# Supplementary material for: Systemic Influences of Mammary Cancer on Monocytes in Mice
Source: MDPI journal article supplement (doi:10.3390/cancers14030833), 2022-02-07

## **Supplementary Figure Legends**

**Supplementary Figure S1:** (A) Flow cytometric gating and cell-sorting strategy for blood monocytes and neutrophils used in Figure 1, 2, 4 and 6. (B) Total number of cells in each monocyte subpopulation in 50µl of blood from mice with ~20mm tumour late-cancer (red dots) versus controls (black dots). \* p value <0.05, \*\* p value <0.01, \*\*\* p value <0.001, multiple t-test. Data is combined from two independent experiments, with n=12 (cancer) and n=13 (control) mice in total.

**Supplementary Figure S2:** Flow cytometric gating strategy for BM monocytes in Figure 1 and Figure 2E.

**Supplementary Figure S3:** Flow cytometric gating strategy for identification and sorting of BM Ly6C<sup>high</sup> monocytes, MDPs and cMoPs in Figure 2A, C and Figure 6.

**Supplementary Figure S4:** Flow cytometric gating strategy for identification and sorting of BM LK in Figure 2A and B.

**Supplementary Figure S5:** Flow cytometric gating strategy for identification of BM myeloid progenitors in Figure 2D.

**Supplementary Figure S6:** Flow cytometric gating strategy for identification of splenic Ly6C<sup>high</sup> monocytes and MDP in Figure 3.

**Supplementary Figure S7:** Identification of BrdU<sup>+</sup> monocytes in the blood (A), BM (B) and spleen (C) in Figure 2D-F and Figure 3F. Example staining taken at 24 (A) or 1 (B-C) hrs post-injection of BrdU.

**Supplementary Figure S8:** Bulk RNA sequencing of Ly6C<sup>high</sup> and Ly6C<sup>low</sup> blood monocytes from C57BL/6 mice with late cancer and littermate controls. (A)

*PCA of all*

*monocytic samples derived from total RNAseq. (B) PCA of Ly6C<sup>low</sup> monocytes derived from total RNAseq.*

Supplementary Figure S1

A

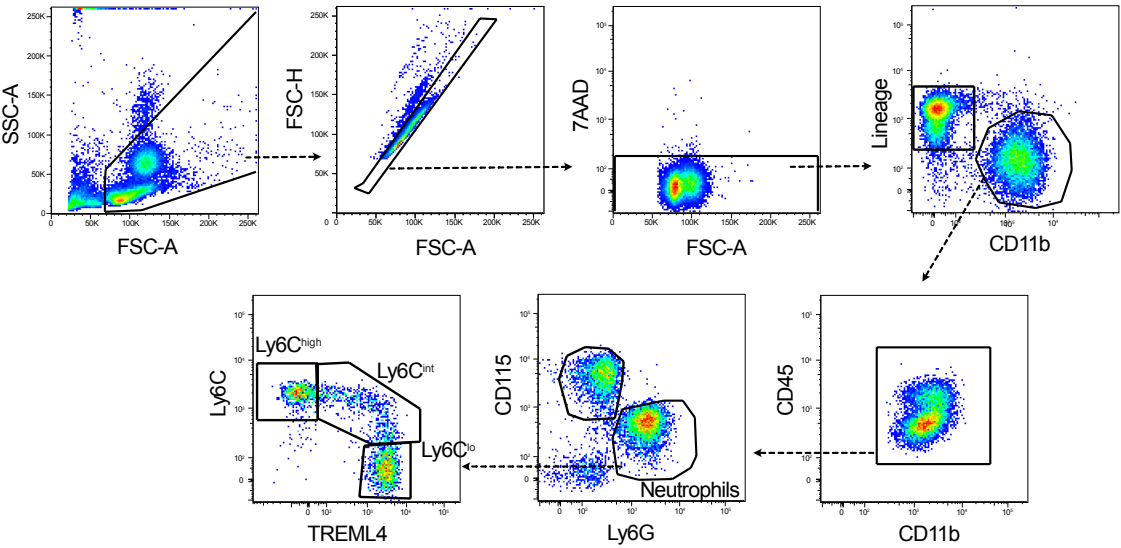

B

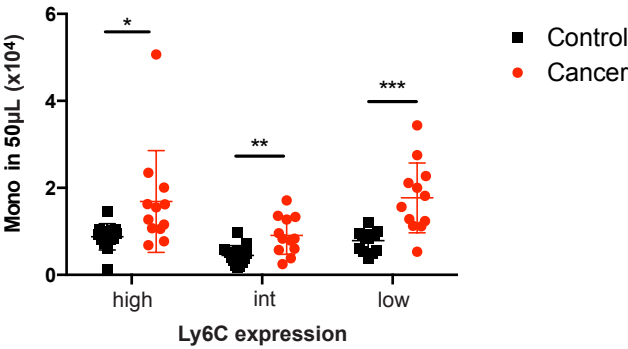

**Supplementary Figure S2**

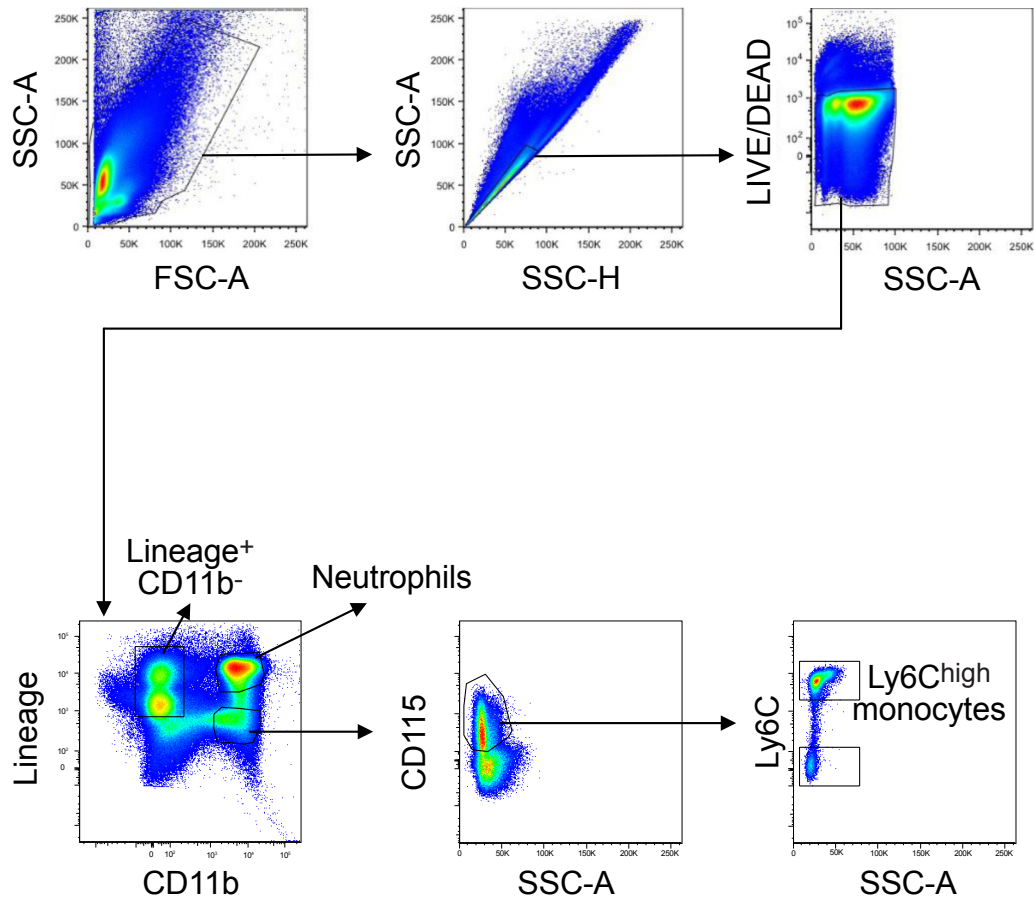

Supplementary Figure S3

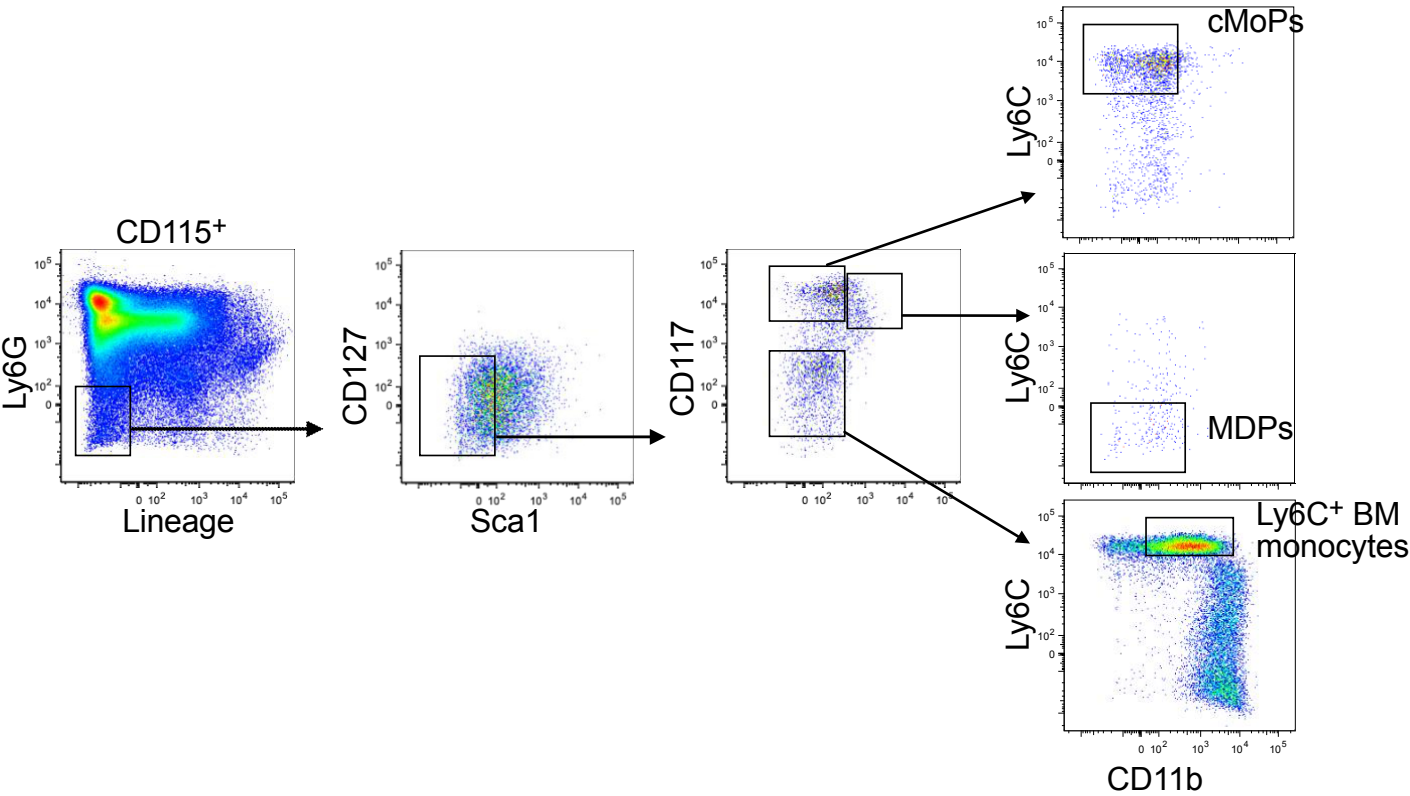

Supplementary Figure S4

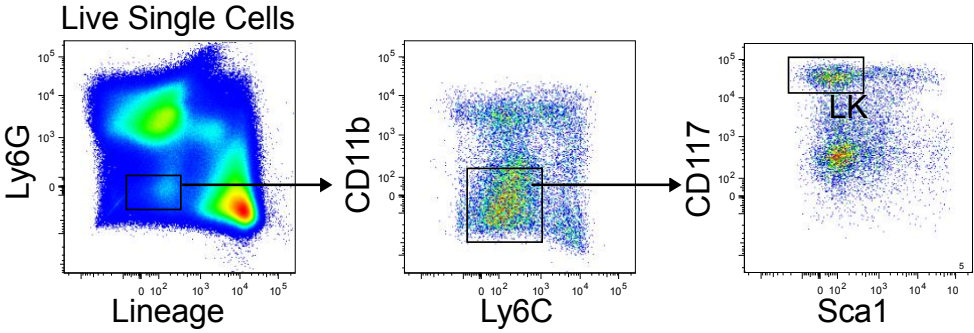

**Supplementary Figure S5**

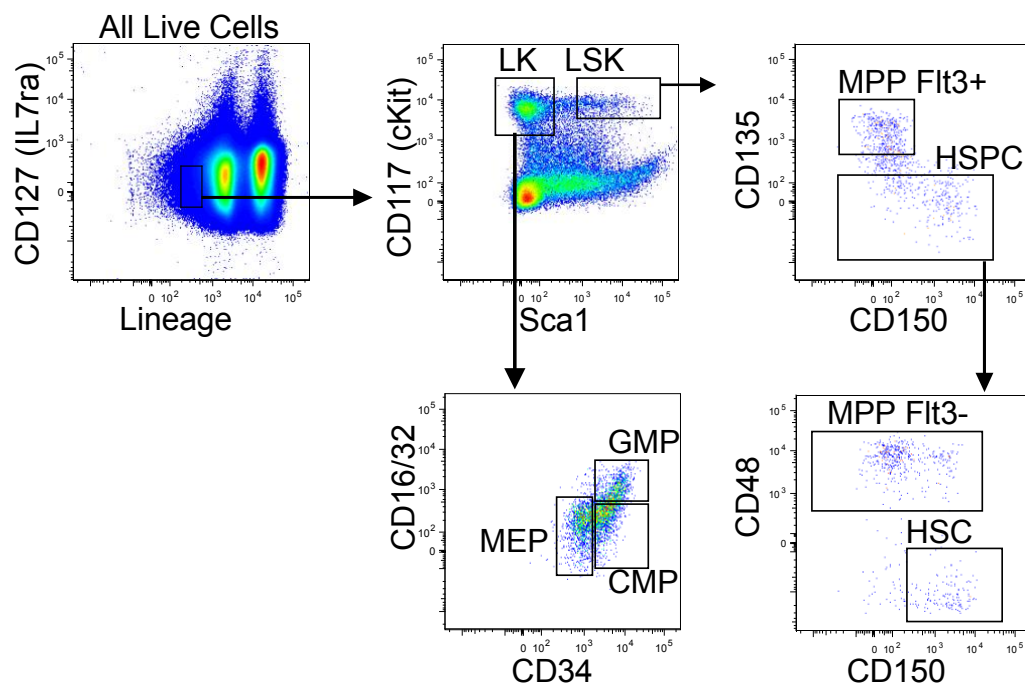

Supplementary Figure S6

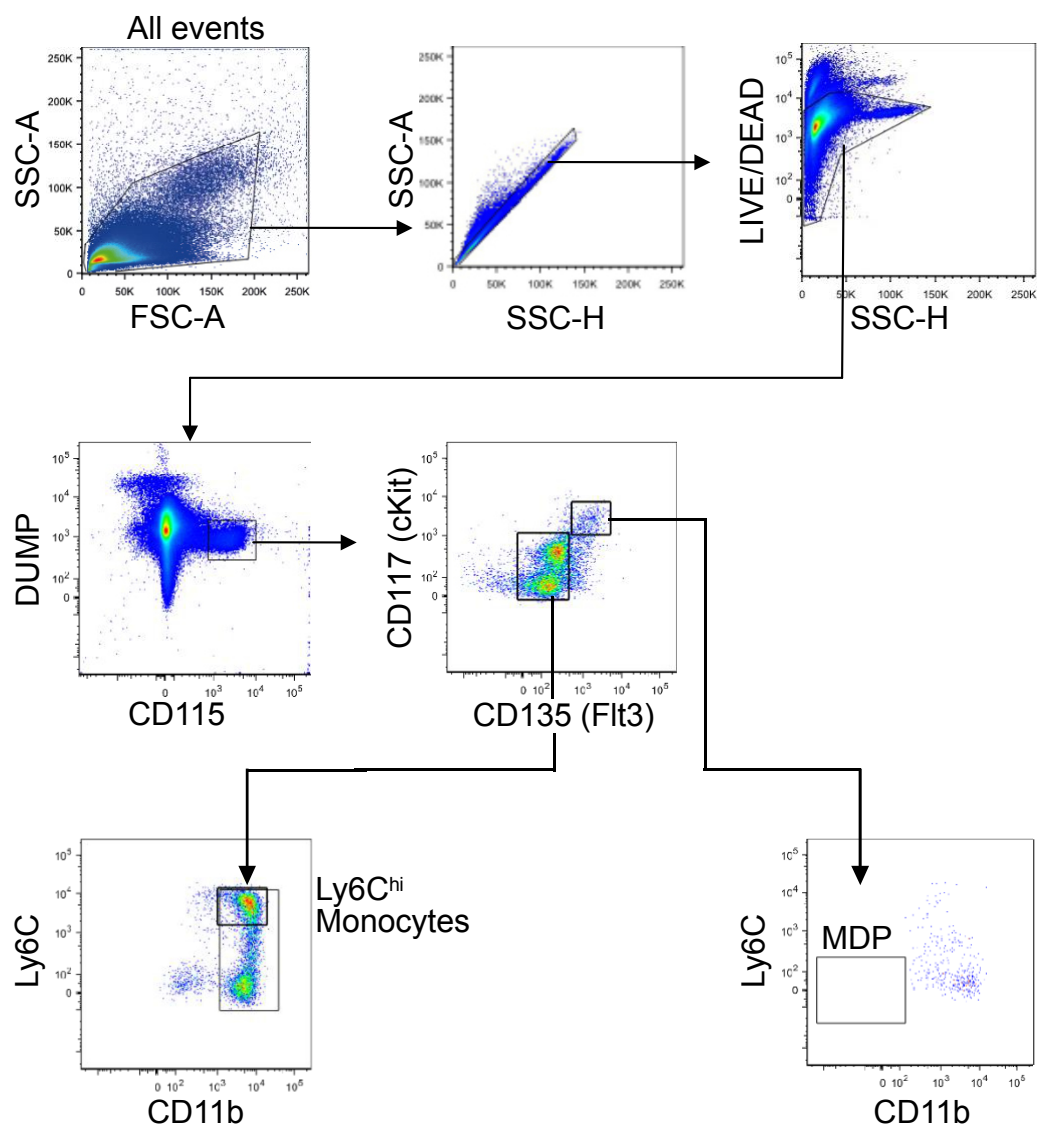



## Supplementary Figure S7

A

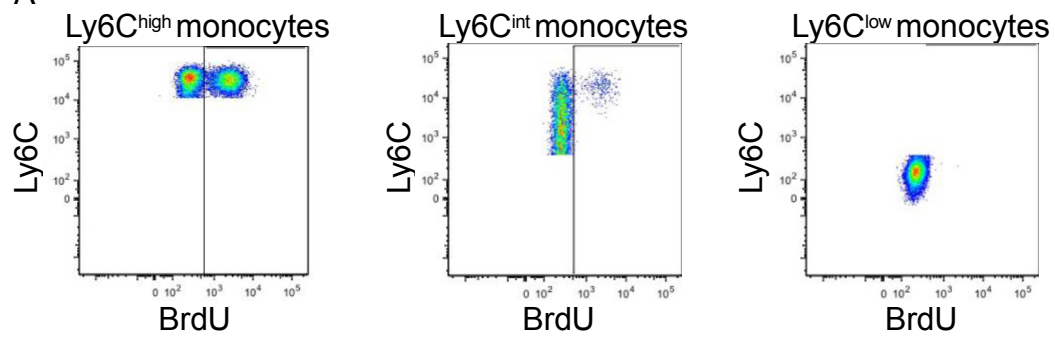

B All CD115<sup>+</sup> monocytes

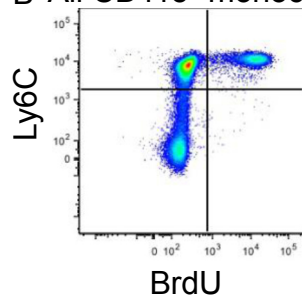

C Ly6C<sup>high</sup> monocytes

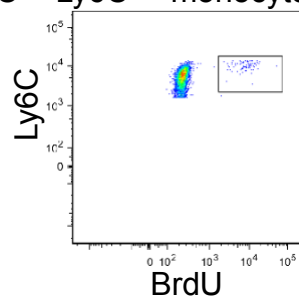

Supplementary Figure S8

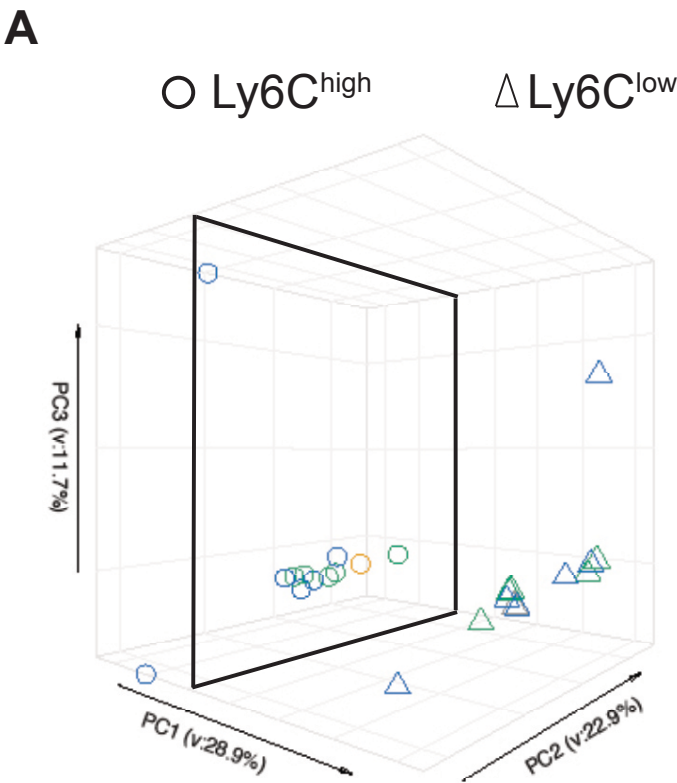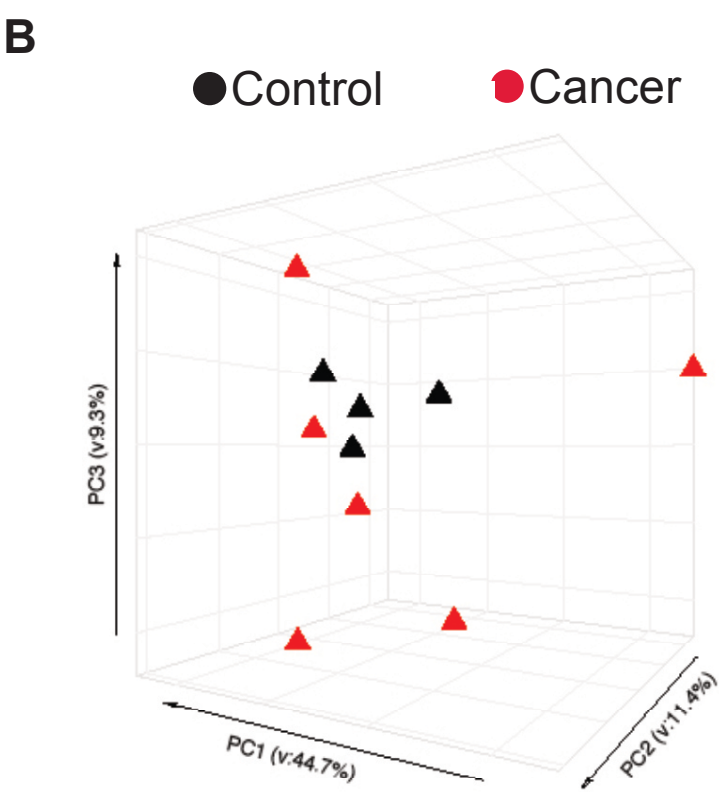

Supplement: s1 [file s1]
