# Supplementary material for: Systemic Influences of Mammary Cancer on Monocytes in Mice
Source: Cancers (Basel). 2022 Feb 7;14(3):833. doi: 10.3390/cancers14030833 (PMC8834227; doi:10.3390/cancers14030833)
Supplement: Supplementary file 1 [file cancers-14-00833-s001.zip]

Archive with 5 entries (5 files):
- Suplementary figures and legends.pdf
- Table S1 C57BL6 mouse blood DEGs.xls
- Table S2 C57BL6 mouse BM DEGs.xls
- Table S3 Bone and blood common DEGs.xlsx
- Table S4 FVB mouse blood DEGs .xls
