# Supplementary material for: Systemic Influences of Mammary Cancer on Monocytes in Mice
Source: Cancers (Basel). 2022 Feb 7;14(3):833. doi: 10.3390/cancers14030833 (PMC8834227; doi:10.3390/cancers14030833)
Supplement: Supplementary file 1 [file cancers-14-00833-s001.zip › Table S1 C57BL6 mouse blood DEGs.xls]

## Sheet: Ly6chigh_DEGs
GENE	baseMean	log2FoldChange	lfcSE	stat	pvalue	padj	contrast
Lpl	7042.02	-1.70108	0.139407	-12.2023	3.02e-34	2.27e-30	CA-CN
Lcn2	303.176	2.53132	0.210411	12.0304	2.46e-33	9.26e-30	CA-CN
Mrc1	1805.83	-1.60126	0.14945	-10.7144	8.71e-27	2.19e-23	CA-CN
Ifit2	5138.08	-1.47345	0.142395	-10.3477	4.29e-25	8.07e-22	CA-CN
Ifit1bl1	1647.43	-1.47948	0.144588	-10.2324	1.42e-24	2.14e-21	CA-CN
Cd300lf	2195.38	0.956979	0.104418	9.1649	4.96e-20	4.71e-17	CA-CN
Klrk1	653.4	-1.6318	0.177825	-9.17641	4.46e-20	4.71e-17	CA-CN
Pbx1	5038.07	1.06636	0.116366	9.16387	5.01e-20	4.71e-17	CA-CN
Aplnr	749.27	-1.6013	0.182637	-8.76767	1.82e-18	1.53e-15	CA-CN
Gcnt2	5376.36	1.35574	0.155395	8.72442	2.68e-18	2.01e-15	CA-CN
Vcan	15441.2	1.20856	0.138752	8.71023	3.03e-18	2.08e-15	CA-CN
Cyp51	1843.45	-0.806506	0.0940294	-8.57717	9.72e-18	6.1e-15	CA-CN
Rsad2	5715	-1.24745	0.146195	-8.53279	1.43e-17	8.27e-15	CA-CN
Ifit3	3427.34	-1.45892	0.174468	-8.3621	6.16e-17	3.31e-14	CA-CN
C1rl	1328.39	1.09907	0.132098	8.32006	8.79e-17	4.41e-14	CA-CN
Ifit3b	685.954	-1.68954	0.210638	-8.02105	1.05e-15	4.93e-13	CA-CN
Slfn9	1341.13	-0.96693	0.121981	-7.92689	2.25e-15	9.95e-13	CA-CN
Hp	42033.6	0.602751	0.0798129	7.55205	4.28e-14	1.79e-11	CA-CN
Tmem268	5794.82	0.719137	0.0957627	7.50957	5.93e-14	2.35e-11	CA-CN
Serpina3g	334.005	-1.84237	0.247741	-7.43667	1.03e-13	3.89e-11	CA-CN
Prtn3	906.429	1.28992	0.17414	7.40737	1.29e-13	4.53e-11	CA-CN
Ifi208	647.015	-1.44467	0.195124	-7.40385	1.32e-13	4.53e-11	CA-CN
Arhgap31	4087.32	-0.700849	0.0960114	-7.29964	2.89e-13	9.45e-11	CA-CN
F10	11678.4	0.750158	0.10412	7.20475	5.82e-13	1.82e-10	CA-CN
Cmpk2	6098.15	-0.689292	0.0965879	-7.13643	9.58e-13	2.77e-10	CA-CN
Ptgfrn	1858.15	0.913055	0.127931	7.1371	9.53e-13	2.77e-10	CA-CN
Slpi	3347	0.897338	0.126639	7.08578	1.38e-12	3.86e-10	CA-CN
Btla	2300.09	-0.820877	0.116535	-7.04406	1.87e-12	5.02e-10	CA-CN
Parp14	24796.8	-0.56861	0.0813606	-6.98877	2.77e-12	7.2e-10	CA-CN
Nab2	757.248	-1.09178	0.156983	-6.95475	3.53e-12	8.86e-10	CA-CN
Parvg	2096.51	0.67122	0.0974889	6.8851	5.77e-12	1.4e-09	CA-CN
Gbp9	4194.33	-0.860042	0.126405	-6.80387	1.02e-11	2.4e-09	CA-CN
Itgb3	1818.11	-0.832359	0.122974	-6.76857	1.3e-11	2.97e-09	CA-CN
Lbp	569.203	1.14967	0.170204	6.75468	1.43e-11	3.17e-09	CA-CN
Slamf7	1807.18	-1.09006	0.162118	-6.72385	1.77e-11	3.81e-09	CA-CN
S100a8	116.082	2.25933	0.338182	6.68082	2.38e-11	4.97e-09	CA-CN
Ccr1	2646.77	1.13857	0.17307	6.57869	4.75e-11	9.66e-09	CA-CN
Ptgr1	942.558	0.903101	0.14017	6.4429	1.17e-10	2.29e-08	CA-CN
Tcf19	411.174	1.13549	0.176291	6.44099	1.19e-10	2.29e-08	CA-CN
Gm5431	2097.61	-0.85058	0.134832	-6.30846	2.82e-10	5.3e-08	CA-CN
Serinc3	69695.2	-0.460464	0.0734863	-6.26598	3.7e-10	6.8e-08	CA-CN
Ifit1	2712.51	-1.00201	0.166013	-6.03576	1.58e-09	2.83e-07	CA-CN
Nlrp1c-ps	736.349	-1.05739	0.175288	-6.03229	1.62e-09	2.83e-07	CA-CN
Mmp8	8258.22	0.76981	0.12795	6.01648	1.78e-09	3.05e-07	CA-CN
Tlr11	561.882	-1.33872	0.223307	-5.99496	2.04e-09	3.41e-07	CA-CN
Ctsl	1833.67	0.597109	0.100184	5.96014	2.52e-09	4.12e-07	CA-CN
Ier3	234.209	1.39318	0.235387	5.91868	3.25e-09	5.02e-07	CA-CN
Cd36	623.971	-1.25742	0.212448	-5.91871	3.24e-09	5.02e-07	CA-CN
Atp11a	5183.52	0.796055	0.134523	5.9176	3.27e-09	5.02e-07	CA-CN
Cfb	2602.39	-0.684017	0.115816	-5.90609	3.5e-09	5.28e-07	CA-CN
Siglece	2075.35	0.660668	0.112681	5.86317	4.54e-09	6.7e-07	CA-CN
Sqle	730.593	-0.777212	0.132916	-5.84741	4.99e-09	7.23e-07	CA-CN
Tarm1	742.746	1.28163	0.220927	5.80116	6.59e-09	9.36e-07	CA-CN
Gbp7	3920.04	-0.67422	0.117049	-5.76014	8.4e-09	1.17e-06	CA-CN
Mthfr	8017.25	-0.529876	0.0922416	-5.74443	9.22e-09	1.24e-06	CA-CN
Ifih1	7249.57	-0.57342	0.0997892	-5.74631	9.12e-09	1.24e-06	CA-CN
Znfx1	17669.5	-0.653277	0.113808	-5.74016	9.46e-09	1.25e-06	CA-CN
Jak3	3005.85	0.636603	0.112742	5.64655	1.64e-08	2.12e-06	CA-CN
Slc46a3	3578.75	-0.696769	0.124168	-5.61153	2.01e-08	2.56e-06	CA-CN
Galnt6	1931.44	0.743579	0.133094	5.58688	2.31e-08	2.9e-06	CA-CN
Zbtb16	1038.85	-0.768532	0.137819	-5.57638	2.46e-08	3.03e-06	CA-CN
Flot1	4117.45	0.69194	0.124458	5.55962	2.7e-08	3.28e-06	CA-CN
Lrg1	233.753	3.14816	0.567877	5.54373	2.96e-08	3.54e-06	CA-CN
Ctdspl	2921.33	0.88455	0.161369	5.48152	4.22e-08	4.96e-06	CA-CN
Akt3	5948.99	-0.518351	0.0946775	-5.47491	4.38e-08	5.07e-06	CA-CN
Il12rb2	581.905	-1.02444	0.187871	-5.45288	4.96e-08	5.65e-06	CA-CN
Zcchc2	5308.48	-0.437458	0.0816435	-5.35815	8.41e-08	9.17e-06	CA-CN
Mtss1	1852.95	-0.757142	0.141274	-5.35938	8.35e-08	9.17e-06	CA-CN
Klf16	937.968	-0.723701	0.13502	-5.35997	8.32e-08	9.17e-06	CA-CN
Slco3a1	1015.42	-0.826931	0.154551	-5.35053	8.77e-08	9.43e-06	CA-CN
Ifi30	32838.1	0.4686	0.0877265	5.3416	9.21e-08	9.63e-06	CA-CN
Ifi207	19946	-0.367687	0.0688342	-5.34163	9.21e-08	9.63e-06	CA-CN
Sema6b	626.11	0.971235	0.182019	5.33589	9.51e-08	9.81e-06	CA-CN
Phf11d	1056.26	-1.12552	0.211406	-5.32399	1.02e-07	1.03e-05	CA-CN
Gramd3	1066.74	-0.858848	0.161891	-5.30512	1.13e-07	1.13e-05	CA-CN
Cyp39a1	1176.39	0.672232	0.12709	5.28943	1.23e-07	1.22e-05	CA-CN
Gm12250	3692.7	-0.821019	0.155466	-5.28104	1.28e-07	1.26e-05	CA-CN
Flot2	6917.47	0.614836	0.116502	5.27749	1.31e-07	1.26e-05	CA-CN
Nt5c3	1844.76	-0.765902	0.145173	-5.2758	1.32e-07	1.26e-05	CA-CN
Tor3a	7843.33	-0.487516	0.0927802	-5.25452	1.48e-07	1.4e-05	CA-CN
Oasl2	17512.2	-0.709079	0.135051	-5.25046	1.52e-07	1.41e-05	CA-CN
Herc6	2619.19	-0.739454	0.142535	-5.18788	2.13e-07	1.95e-05	CA-CN
Stat2	14630.6	-0.557686	0.107788	-5.1739	2.29e-07	2.06e-05	CA-CN
Papd7	2691.66	-0.533121	0.10305	-5.17341	2.3e-07	2.06e-05	CA-CN
Ly9	4894.09	-0.476648	0.0922408	-5.16743	2.37e-07	2.1e-05	CA-CN
Clic4	2901.92	-0.580574	0.113996	-5.09292	3.53e-07	3.09e-05	CA-CN
Etnk1	8269.29	-0.431986	0.0850234	-5.08079	3.76e-07	3.23e-05	CA-CN
Ube2l6	3027.57	-0.661255	0.130162	-5.08024	3.77e-07	3.23e-05	CA-CN
Irgm2	5928.71	-0.793859	0.156546	-5.07109	3.96e-07	3.35e-05	CA-CN
Tef	1704.45	-0.654983	0.129487	-5.05829	4.23e-07	3.54e-05	CA-CN
Dhx40	4435.5	-0.421096	0.0837261	-5.02944	4.92e-07	4.07e-05	CA-CN
Slc16a6	2596.12	0.481186	0.0961323	5.00545	5.57e-07	4.56e-05	CA-CN
H2-T24	9294.29	-0.656239	0.131448	-4.99239	5.96e-07	4.83e-05	CA-CN
Hopx	7289.12	0.434344	0.087136	4.98466	6.21e-07	4.97e-05	CA-CN
Daxx	9182.8	-0.460259	0.0923751	-4.98251	6.28e-07	4.97e-05	CA-CN
Cds1	2111.68	-0.426831	0.085955	-4.96574	6.84e-07	5.36e-05	CA-CN
Nab1	5618.04	-0.392678	0.079105	-4.96401	6.91e-07	5.36e-05	CA-CN
Samd9l	12141.9	-0.716397	0.144946	-4.94252	7.71e-07	5.92e-05	CA-CN
Sfxn5	1103.81	0.609966	0.12354	4.93738	7.92e-07	6.02e-05	CA-CN
Elk4	2936.43	-0.613877	0.124803	-4.91879	8.71e-07	6.53e-05	CA-CN
Crybg1	9198.95	-0.395205	0.0803647	-4.91765	8.76e-07	6.53e-05	CA-CN
Ifi213	1239.24	-0.783155	0.159774	-4.90165	9.5e-07	7.01e-05	CA-CN
Socs1	311.63	-1.22518	0.250289	-4.89505	9.83e-07	7.18e-05	CA-CN
Stard4	1409.45	-0.503158	0.102829	-4.89318	9.92e-07	7.18e-05	CA-CN
Gngt2	6431.95	0.439697	0.090065	4.88199	1.05e-06	7.53e-05	CA-CN
AW011738	837.203	-0.734282	0.150577	-4.87646	1.08e-06	7.67e-05	CA-CN
Gpx3	1043.73	0.525388	0.107795	4.87396	1.09e-06	7.7e-05	CA-CN
Usp18	3230.91	-0.713884	0.146759	-4.86431	1.15e-06	8.01e-05	CA-CN
Fndc3a	8909.45	-0.452185	0.0931783	-4.8529	1.22e-06	8.4e-05	CA-CN
Abca9	14220.8	-0.417471	0.0861213	-4.84747	1.25e-06	8.56e-05	CA-CN
Abca6	2390.48	-0.474428	0.0979583	-4.84316	1.28e-06	8.67e-05	CA-CN
Rtl5	2020.81	-0.597851	0.123546	-4.83909	1.3e-06	8.77e-05	CA-CN
Id1	602.895	0.897932	0.185812	4.83249	1.35e-06	8.98e-05	CA-CN
Fgl2	16491.7	-0.512002	0.106161	-4.82286	1.42e-06	9.35e-05	CA-CN
Mmp19	2887.68	0.662696	0.137528	4.81861	1.45e-06	9.46e-05	CA-CN
Nr1d2	1136.04	-0.611573	0.127404	-4.80025	1.58e-06	0.00010285	CA-CN
Abcb1b	933.148	-0.678039	0.141386	-4.79564	1.62e-06	0.00010435	CA-CN
Camk2d	9096.42	0.484582	0.101183	4.78915	1.67e-06	0.00010687	CA-CN
Mfsd13a	1063.66	0.504829	0.105612	4.78005	1.75e-06	0.00011088	CA-CN
0610040J01Rik	1198.32	0.564372	0.118239	4.77315	1.81e-06	0.00011379	CA-CN
Kctd12	31053.8	-0.417138	0.0874616	-4.76938	1.85e-06	0.00011498	CA-CN
Pla2g7	13561.6	0.622505	0.130634	4.76524	1.89e-06	0.00011641	CA-CN
4930523C07Rik	5005.2	-0.46571	0.0978331	-4.76025	1.93e-06	0.00011836	CA-CN
Rab44	3130.83	0.518133	0.109205	4.74458	2.09e-06	0.00012686	CA-CN
Tpst1	1653.91	-0.50984	0.107504	-4.74253	2.11e-06	0.00012713	CA-CN
Galm	537.552	0.665911	0.140905	4.72595	2.29e-06	0.00013686	CA-CN
Fam13b	2887.64	-0.399721	0.0848086	-4.71321	2.44e-06	0.00014456	CA-CN
Oasl1	1652.54	-0.805519	0.17124	-4.70403	2.55e-06	0.00014773	CA-CN
Serpinb8	1643.36	-0.576136	0.122413	-4.70649	2.52e-06	0.00014773	CA-CN
Bmx	1626.67	0.769114	0.163463	4.70512	2.54e-06	0.00014773	CA-CN
Hmgcs1	2490.84	-0.544022	0.115853	-4.69581	2.66e-06	0.00015262	CA-CN
Cisd1	1252.06	0.481849	0.102709	4.69141	2.71e-06	0.00015476	CA-CN
Isg15	2167.69	-0.761795	0.162964	-4.67463	2.94e-06	0.00016671	CA-CN
Dnmt3a	2520.79	-0.647964	0.139085	-4.65878	3.18e-06	0.00017872	CA-CN
Ddx58	7068.44	-0.601298	0.129377	-4.64764	3.36e-06	0.00018725	CA-CN
Spink2	118.2	1.33819	0.289428	4.62356	3.77e-06	0.00020882	CA-CN
Hmgcr	3817.73	-0.40854	0.0886408	-4.60894	4.05e-06	0.00022242	CA-CN
Irf7	21068	-0.642235	0.139431	-4.60611	4.1e-06	0.00022383	CA-CN
Ifi209	19795.2	-0.534746	0.116352	-4.59593	4.31e-06	0.00023169	CA-CN
Cep192	2689.3	-0.419675	0.0912877	-4.59728	4.28e-06	0.00023169	CA-CN
Tspan32	787.124	0.5634	0.12276	4.58943	4.44e-06	0.00023733	CA-CN
Mov10	1586.86	-0.541466	0.118324	-4.57612	4.74e-06	0.00025115	CA-CN
H1f0	3695.21	0.686898	0.150297	4.57026	4.87e-06	0.00025647	CA-CN
Jun	754.785	-0.893465	0.196297	-4.55159	5.32e-06	0.00027837	CA-CN
Cdk20	403.33	0.773374	0.170354	4.53979	5.63e-06	0.00029239	CA-CN
Dtx3l	16989	-0.419849	0.0926199	-4.53303	5.81e-06	0.00029984	CA-CN
Gda	39679.8	0.430388	0.0950565	4.52771	5.96e-06	0.00030539	CA-CN
Trem3	954.299	0.642987	0.142057	4.52626	6e-06	0.00030542	CA-CN
Kbtbd11	4831.05	-0.599666	0.132564	-4.52361	6.08e-06	0.00030719	CA-CN
F11r	972.402	2.31329	0.511568	4.52196	6.13e-06	0.00030754	CA-CN
Mob1a	10364.6	-0.397018	0.0880043	-4.51134	6.44e-06	0.0003212	CA-CN
Nr3c1	8014.61	-0.390517	0.0866541	-4.50661	6.59e-06	0.00032627	CA-CN
Calcrl	1131.58	-0.443683	0.0990846	-4.47782	7.54e-06	0.00037108	CA-CN
Il15	918.257	-0.644058	0.14424	-4.46518	8e-06	0.00039113	CA-CN
Nme1	1791.14	0.488225	0.109643	4.45285	8.47e-06	0.0004116	CA-CN
Stat1	28994.4	-0.665564	0.149728	-4.44516	8.78e-06	0.00042387	CA-CN
Dyrk2	2078.92	-0.585658	0.132552	-4.41832	9.95e-06	0.00047703	CA-CN
Phactr2	5056.76	-0.381878	0.0865959	-4.40988	1.03e-05	0.00048669	CA-CN
Slc25a22	3179.88	-0.433142	0.0982192	-4.40996	1.03e-05	0.00048669	CA-CN
Trim30d	5668.02	-0.461249	0.104548	-4.41183	1.03e-05	0.00048669	CA-CN
Slc30a1	3626.61	-0.386391	0.0876758	-4.40704	1.05e-05	0.00049005	CA-CN
Frmd4a	6192.89	-0.415136	0.0942593	-4.40419	1.06e-05	0.00049347	CA-CN
Tap1	17062.5	-0.546376	0.124277	-4.39642	1.1e-05	0.00050833	CA-CN
Ccdc50	15473.9	-0.369552	0.0841776	-4.39014	1.13e-05	0.00052003	CA-CN
Ahnak	307512	-0.423394	0.0966504	-4.38067	1.18e-05	0.00053987	CA-CN
Csf2rb2	6864.14	0.392338	0.0897078	4.37352	1.22e-05	0.00055452	CA-CN
Cxcl10	1240.45	-1.62603	0.372816	-4.36149	1.29e-05	0.00058239	CA-CN
Atf7	7273.72	-0.356227	0.0818047	-4.3546	1.33e-05	0.00059039	CA-CN
Nectin1	3896.02	-0.365067	0.0838246	-4.35513	1.33e-05	0.00059039	CA-CN
Myof	8435.43	-0.545697	0.125273	-4.35608	1.32e-05	0.00059039	CA-CN
Ddx60	1220.72	-0.693729	0.159755	-4.34245	1.41e-05	0.00062038	CA-CN
Emilin1	4566.41	0.505477	0.116452	4.34065	1.42e-05	0.00062185	CA-CN
Oas3	15472.2	-0.706421	0.162879	-4.3371	1.44e-05	0.00062833	CA-CN
Ago2	5745.2	-0.560738	0.129525	-4.32917	1.5e-05	0.00064762	CA-CN
C5ar2	723.98	0.927642	0.214376	4.32717	1.51e-05	0.00064981	CA-CN
Gpr15	500.829	0.644073	0.1492	4.31683	1.58e-05	0.00067613	CA-CN
Bcl3	5465.52	0.362979	0.0841027	4.3159	1.59e-05	0.00067613	CA-CN
Parp12	8465.96	-0.470726	0.109437	-4.30133	1.7e-05	0.00071411	CA-CN
Nxpe5	529.801	0.578542	0.134476	4.30219	1.69e-05	0.00071411	CA-CN
Cdk6	2474.51	-0.574801	0.134328	-4.27908	1.88e-05	0.00078498	CA-CN
Ifi211	4121.16	-0.514091	0.120524	-4.26548	1.99e-05	0.00082976	CA-CN
Sdf2l1	2142.18	0.406992	0.0956661	4.2543	2.1e-05	0.00086751	CA-CN
Usp9x	6046.24	-0.4848	0.11413	-4.24778	2.16e-05	0.00088824	CA-CN
Ldha	8730.77	0.379931	0.0895791	4.24129	2.22e-05	0.00090935	CA-CN
Insl3	171.733	0.933175	0.220123	4.23934	2.24e-05	0.00091236	CA-CN
Skint3	3532.39	-0.406687	0.0959658	-4.23783	2.26e-05	0.00091355	CA-CN
Cd2	222.824	1.0542	0.249061	4.23271	2.31e-05	0.0009296	CA-CN
Srebf2	9861.62	-0.472049	0.11156	-4.23133	2.32e-05	0.00093036	CA-CN
Nampt	7220.32	-0.406878	0.0962593	-4.22689	2.37e-05	0.0009389	CA-CN
Gsdme	532.177	0.54642	0.129255	4.22745	2.36e-05	0.0009389	CA-CN
Tlr7	14686	-0.332229	0.0788528	-4.21329	2.52e-05	0.0009921	CA-CN
Cbr3	284.33	0.67414	0.161187	4.18234	2.89e-05	0.00113143	CA-CN
Camkk2	25643.7	-0.339034	0.0812748	-4.17146	3.03e-05	0.00117458	CA-CN
Bbx	3097.76	-0.488071	0.116984	-4.1721	3.02e-05	0.00117458	CA-CN
Rnf214	1679.35	-0.449833	0.108089	-4.16168	3.16e-05	0.00121977	CA-CN
Gsr	52999.2	0.391454	0.0941661	4.15706	3.22e-05	0.00123834	CA-CN
Parp11	2161.03	-0.518128	0.124805	-4.15149	3.3e-05	0.00126239	CA-CN
Irf4	8718.71	-0.504756	0.122103	-4.13386	3.57e-05	0.00135642	CA-CN
Cdkn2d	3587.25	0.635029	0.153664	4.13259	3.59e-05	0.0013571	CA-CN
Aff1	4592.94	-0.389751	0.0943395	-4.13136	3.61e-05	0.00135757	CA-CN
Ppp1r3d	720.509	0.619734	0.150554	4.11637	3.85e-05	0.00143459	CA-CN
Rrad	341.388	-0.732642	0.177975	-4.11655	3.85e-05	0.00143459	CA-CN
Tor1aip2	6194.17	-0.40022	0.0977612	-4.09386	4.24e-05	0.0015506	CA-CN
Setdb2	1793.56	-0.479035	0.116991	-4.09463	4.23e-05	0.0015506	CA-CN
Serpinb1a	980.08	0.708142	0.172919	4.09522	4.22e-05	0.0015506	CA-CN
Msrb1	32051.7	0.344963	0.0842055	4.09667	4.19e-05	0.0015506	CA-CN
Cd164	3862.77	-0.428368	0.105155	-4.07369	4.63e-05	0.00167993	CA-CN
Rab36	2325.2	0.526238	0.129201	4.073	4.64e-05	0.00167993	CA-CN
Dennd1b	3243.67	-0.504841	0.124011	-4.07094	4.68e-05	0.00168681	CA-CN
S100a11	5746.96	0.49799	0.122813	4.05486	5.02e-05	0.0017985	CA-CN
Acp5	814.965	0.653554	0.161415	4.04889	5.15e-05	0.00183185	CA-CN
Fam49a	16067.5	-0.305999	0.0755862	-4.04835	5.16e-05	0.00183185	CA-CN
Med30	913.462	0.542604	0.134417	4.03673	5.42e-05	0.00190696	CA-CN
Nfil3	3601.36	0.452904	0.112179	4.03732	5.41e-05	0.00190696	CA-CN
Atf6	12319.3	-0.338538	0.0840638	-4.02716	5.65e-05	0.00195877	CA-CN
Lcp1	63748.9	0.338213	0.0839783	4.02738	5.64e-05	0.00195877	CA-CN
Sh2d1b1	746.572	0.553942	0.13752	4.02809	5.62e-05	0.00195877	CA-CN
Kmt2a	6548.94	-0.400545	0.0995319	-4.02428	5.71e-05	0.00197374	CA-CN
Pml	6495.96	-0.613561	0.152679	-4.01864	5.85e-05	0.00200326	CA-CN
Slfn8	9847.34	-0.375319	0.0933711	-4.01965	5.83e-05	0.00200326	CA-CN
Id2	3104.83	0.73611	0.18331	4.01566	5.93e-05	0.00201317	CA-CN
Smchd1	8778.97	-0.350826	0.0873715	-4.01534	5.94e-05	0.00201317	CA-CN
Hivep1	4143.28	-0.511417	0.127493	-4.01134	6.04e-05	0.00203844	CA-CN
Lmtk2	1851.79	-0.73463	0.183455	-4.00442	6.22e-05	0.00208036	CA-CN
Lacc1	1336.25	-0.689955	0.172265	-4.0052	6.2e-05	0.00208036	CA-CN
Scp2	3611.18	0.405309	0.101541	3.99156	6.56e-05	0.00217974	CA-CN
Agrn	2562.92	-0.609401	0.152683	-3.99127	6.57e-05	0.00217974	CA-CN
Sppl2a	18080	-0.287844	0.0721463	-3.98973	6.61e-05	0.00218436	CA-CN
Ifi203	18861.4	-0.540044	0.135442	-3.98728	6.68e-05	0.00219743	CA-CN
Tgtp2	793.639	-1.97176	0.49623	-3.97348	7.08e-05	0.00231862	CA-CN
BC005537	32017.8	-0.275339	0.0693444	-3.9706	7.17e-05	0.00232347	CA-CN
Stap1	921.317	-0.494061	0.124484	-3.96887	7.22e-05	0.00232347	CA-CN
Alox5	749.131	-0.545974	0.137504	-3.97059	7.17e-05	0.00232347	CA-CN
Dhrs1	3477.38	0.326127	0.0821508	3.96985	7.19e-05	0.00232347	CA-CN
Nlrc5	8772.34	-0.625049	0.157773	-3.9617	7.44e-05	0.00238421	CA-CN
Smg1	14494.1	-0.409709	0.103582	-3.9554	7.64e-05	0.0024376	CA-CN
Irgm1	9401.1	-0.632868	0.160066	-3.9538	7.69e-05	0.00244359	CA-CN
Apoc2	4602.35	0.397105	0.100841	3.93792	8.22e-05	0.00260012	CA-CN
Trim36	1106.42	-0.462137	0.117545	-3.93158	8.44e-05	0.00265846	CA-CN
Dennd4c	2149.25	-0.476307	0.121297	-3.92678	8.61e-05	0.00270078	CA-CN
Fam26f	1839.17	-0.574538	0.146747	-3.91515	9.03e-05	0.00282257	CA-CN
Aars	2037.93	0.37943	0.0969758	3.91263	9.13e-05	0.00284039	CA-CN
Ppp2cb	6353.84	0.389409	0.0995825	3.91041	9.21e-05	0.00285477	CA-CN
Tcf20	5689.11	-0.361816	0.0927405	-3.90138	9.56e-05	0.00295124	CA-CN
Parp9	7471.31	-0.320384	0.0822053	-3.89736	9.72e-05	0.00298845	CA-CN
Rasa4	9460.36	-0.454213	0.116749	-3.89052	0.00010003	0.00304905	CA-CN
Cep350	9311.05	-0.440631	0.113238	-3.8912	9.98e-05	0.00304905	CA-CN
Rufy3	1900.16	-0.413882	0.106452	-3.88796	0.00010109	0.00306904	CA-CN
Socs6	3001.06	-0.430053	0.110725	-3.88397	0.00010277	0.0031073	CA-CN
H2-K1	65626.7	-0.485534	0.125342	-3.87367	0.00010721	0.0032287	CA-CN
Lrch3	3990.48	-0.334553	0.0863933	-3.87245	0.00010775	0.00323203	CA-CN
Ms4a4a	7228.61	0.440651	0.114064	3.86319	0.00011192	0.00334377	CA-CN
Jaml	1631.36	0.640589	0.166198	3.85437	0.00011603	0.00345285	CA-CN
Atp8b2	4713.1	-0.303436	0.0787657	-3.85239	0.00011697	0.00346718	CA-CN
Gm14005	710.876	0.461274	0.119854	3.84864	0.00011878	0.00350694	CA-CN
Gm45935	1994.12	-0.440557	0.114553	-3.84588	0.00012012	0.0035328	CA-CN
Wnk1	12508.6	-0.356125	0.0927908	-3.83794	0.00012407	0.00363478	CA-CN
Lonp2	2848.24	0.343213	0.0894773	3.83575	0.00012518	0.00365304	CA-CN
Lgals1	6890.11	0.455146	0.118788	3.83159	0.00012732	0.00370111	CA-CN
Pi16	9705.77	0.375439	0.0981327	3.82583	0.00013033	0.0037741	CA-CN
Plxnc1	2772.4	-0.382534	0.100265	-3.81525	0.00013605	0.00391626	CA-CN
Ifi204	18589	-0.38375	0.100595	-3.81482	0.00013628	0.00391626	CA-CN
Dcp2	5743.85	-0.305247	0.0800639	-3.81255	0.00013754	0.00393745	CA-CN
Atf7ip	7163.92	-0.355857	0.0937074	-3.79754	0.00014614	0.00416782	CA-CN
Eif2ak2	8575.31	-0.345521	0.0911241	-3.79176	0.00014958	0.00424979	CA-CN
Isg20	1179.49	-0.599649	0.158493	-3.78343	0.00015468	0.00437814	CA-CN
Cd84	11621.1	-0.293549	0.0776202	-3.78187	0.00015566	0.00438925	CA-CN
Nlrp1b	1936.95	-0.499749	0.132281	-3.77794	0.00015813	0.00442593	CA-CN
Jak2	5654.62	-0.300058	0.0794236	-3.77795	0.00015813	0.00442593	CA-CN
Tgfbi	95641.1	0.323313	0.0860385	3.75777	0.00017143	0.00478043	CA-CN
Ldlr	12345.5	-0.439619	0.11706	-3.75551	0.00017299	0.0048061	CA-CN
Birc6	12326.8	-0.358484	0.0956365	-3.74841	0.00017796	0.00490813	CA-CN
Csf2rb	28061.1	0.298616	0.079665	3.7484	0.00017797	0.00490813	CA-CN
Entpd1	2672.26	-0.387116	0.103312	-3.74706	0.00017892	0.00491627	CA-CN
Met	4593.95	-0.379145	0.101363	-3.74046	0.00018368	0.00502892	CA-CN
Dhcr24	1498.96	-0.484729	0.129712	-3.73695	0.00018627	0.00506289	CA-CN
Cmtm3	5487.43	-0.337978	0.0904251	-3.73766	0.00018574	0.00506289	CA-CN
Lgals3bp	14443	-0.534014	0.143024	-3.73375	0.00018865	0.00510924	CA-CN
Cd302	5133.09	0.490882	0.13151	3.73265	0.00018948	0.00511317	CA-CN
Mndal	9645.32	-0.401181	0.107849	-3.71985	0.00019934	0.00536009	CA-CN
Dock7	2520.98	-0.395435	0.106454	-3.7146	0.00020352	0.00545312	CA-CN
Uqcc2	946.061	0.417582	0.112684	3.70579	0.00021073	0.00562619	CA-CN
Syne3	5377.82	-0.423282	0.114279	-3.70392	0.00021229	0.00564786	CA-CN
Krtcap2	1794.59	0.444548	0.120165	3.69948	0.00021604	0.00572731	CA-CN
Ash1l	4569.03	-0.35356	0.0956199	-3.69755	0.00021769	0.00575077	CA-CN
Olfm1	8778.2	0.454418	0.12298	3.69505	0.00021984	0.00578737	CA-CN
Rasgef1b	499.743	-0.89673	0.242743	-3.69416	0.00022062	0.00578755	CA-CN
Traf3	6004.72	-0.387427	0.104938	-3.69195	0.00022254	0.00579755	CA-CN
D17Wsu92e	13662.7	-0.337897	0.0915007	-3.69283	0.00022177	0.00579755	CA-CN
Mt1	135.048	1.0664	0.289296	3.68619	0.00022763	0.0058895	CA-CN
Vcl	10083.5	-0.344489	0.0934384	-3.6868	0.00022709	0.0058895	CA-CN
Arhgap24	753.919	0.525674	0.142789	3.68147	0.0002319	0.00595884	CA-CN
Gm1966	33531.9	-0.398778	0.108305	-3.682	0.00023141	0.00595884	CA-CN
Phpt1	254.071	0.615011	0.167359	3.67481	0.00023803	0.00608926	CA-CN
Zbp1	10988.2	-0.440223	0.119814	-3.67421	0.00023859	0.00608926	CA-CN
Mx2	1407.97	-0.48123	0.131324	-3.66445	0.00024787	0.00630473	CA-CN
Vcpip1	8139.98	-0.32396	0.0885661	-3.65784	0.00025435	0.00642621	CA-CN
Herc1	8279.99	-0.343784	0.0939643	-3.65867	0.00025353	0.00642621	CA-CN
Mx1	9069.79	-0.513069	0.140654	-3.64775	0.00026455	0.00666157	CA-CN
Dnajb9	1152.11	-0.425841	0.116957	-3.64099	0.00027159	0.00681608	CA-CN
Anxa3	2495.07	-0.527671	0.144999	-3.63914	0.00027355	0.00684241	CA-CN
Rel	2408.35	-0.572016	0.157276	-3.63702	0.00027581	0.00686787	CA-CN
Zfp800	1891.31	-0.423717	0.116519	-3.63648	0.00027639	0.00686787	CA-CN
Zfyve19	691.344	0.457414	0.125973	3.63106	0.00028226	0.00699059	CA-CN
Ino80d	5817.2	-0.381997	0.105234	-3.62999	0.00028343	0.00699665	CA-CN
Sbno2	20383.9	0.327579	0.0903247	3.62668	0.00028708	0.00706359	CA-CN
Sik2	1752.98	-0.361979	0.0999566	-3.62136	0.00029306	0.00718715	CA-CN
Rab24	3187.58	0.359201	0.0993351	3.61605	0.00029913	0.00731211	CA-CN
Stxbp2	8249.9	0.297097	0.082188	3.61485	0.00030052	0.00732244	CA-CN
Tmem198b	1505.8	0.516981	0.143133	3.6119	0.00030396	0.00737048	CA-CN
Ncoa7	3036.43	-0.416447	0.115312	-3.61148	0.00030445	0.00737048	CA-CN
Nod1	11711.9	-0.343739	0.0952109	-3.61029	0.00030586	0.00738072	CA-CN
Insig1	2099.99	-0.526641	0.146322	-3.59919	0.00031921	0.00767141	CA-CN
Rtp4	4047.62	-0.618551	0.171887	-3.5986	0.00031994	0.00767141	CA-CN
9930111J21Rik1	2898.47	-0.661257	0.184186	-3.59016	0.00033048	0.00789893	CA-CN
D17H6S56E-5	2459.31	-0.445513	0.124658	-3.57389	0.00035171	0.00837986	CA-CN
Fcnb	279.819	0.981899	0.27517	3.56833	0.00035926	0.00853266	CA-CN
H2-T23	15321.6	-0.362635	0.101798	-3.5623	0.00036762	0.00867664	CA-CN
Mcemp1	8453.25	0.476225	0.133668	3.56274	0.000367	0.00867664	CA-CN
Epsti1	9594.96	-0.33546	0.0944599	-3.55135	0.00038326	0.00901747	CA-CN
Zc3hav1	12797.7	-0.294906	0.0831226	-3.54784	0.0003884	0.00910979	CA-CN
Mycbp2	28035.9	-0.320311	0.0903353	-3.5458	0.00039143	0.00912253	CA-CN
Rnf144b	1676.94	-0.417353	0.117686	-3.54634	0.00039063	0.00912253	CA-CN
Brpf3	2163.96	-0.368966	0.10408	-3.54503	0.00039258	0.00912253	CA-CN
Gm44805	4014.81	0.380692	0.107652	3.53631	0.00040576	0.00939989	CA-CN
Batf	949.795	0.439642	0.12447	3.5321	0.00041227	0.00946978	CA-CN
Tor1aip1	17938.4	-0.257903	0.0730011	-3.53287	0.00041108	0.00946978	CA-CN
Cdk5rap3	2412.27	0.321809	0.0911144	3.53192	0.00041255	0.00946978	CA-CN
Arsi	736.848	-0.442511	0.125472	-3.52676	0.00042068	0.00962695	CA-CN
Zbed6	2971.85	-0.496205	0.140843	-3.52311	0.00042651	0.00970143	CA-CN
Pycr2	1415.38	0.342936	0.0973371	3.52318	0.0004264	0.00970143	CA-CN
Mga	4206.87	-0.376961	0.107089	-3.52009	0.00043141	0.0097833	CA-CN
Gbp3	5811.79	-0.520394	0.148015	-3.51582	0.0004384	0.00988232	CA-CN
Naa25	1956.95	-0.322852	0.091809	-3.51656	0.00043718	0.00988232	CA-CN
Rassf4	72729.5	-0.271132	0.0771399	-3.5148	0.00044008	0.00989072	CA-CN
Kcnab2	11672.1	0.317212	0.0903355	3.51148	0.00044561	0.00995552	CA-CN
Bach1	25130.2	-0.315956	0.089959	-3.51222	0.00044437	0.00995552	CA-CN
Pik3ap1	4350.44	-0.515609	0.147105	-3.50505	0.00045652	0.0100902	CA-CN
Ppil1	446.245	0.509254	0.145271	3.50554	0.00045569	0.0100902	CA-CN
Kpna4	4821	-0.285898	0.0815738	-3.50477	0.000457	0.0100902	CA-CN
Ptprj	25082.1	-0.478731	0.136572	-3.50532	0.00045605	0.0100902	CA-CN
Cpq	674.706	-0.426733	0.12185	-3.50213	0.00046156	0.010161	CA-CN
Tdrd7	6710.44	-0.300774	0.0859936	-3.49763	0.00046941	0.0103038	CA-CN
B4galt6	2254.54	0.373582	0.106946	3.49319	0.00047728	0.010446	CA-CN
Aatk	1680.58	0.497763	0.142639	3.48968	0.00048361	0.0105539	CA-CN
Gls	6430.07	-0.31799	0.0911807	-3.48747	0.00048761	0.0106105	CA-CN
S100a1	757.781	0.467472	0.134225	3.48275	0.0004963	0.0107684	CA-CN
Ascc3	2952.28	-0.362794	0.10421	-3.48138	0.00049884	0.0107924	CA-CN
Id3	260.695	0.697808	0.200587	3.47883	0.0005036	0.0108023	CA-CN
Sun2	9223.12	-0.329983	0.0948522	-3.47892	0.00050344	0.0108023	CA-CN
Ankhd1	6395.73	-0.305378	0.0877546	-3.47991	0.00050158	0.0108023	CA-CN
Nfe2l1	5003.95	-0.287998	0.082974	-3.47094	0.00051863	0.0110617	CA-CN
4932438A13Rik	4154.49	-0.433472	0.124863	-3.47157	0.00051743	0.0110617	CA-CN
Pgap2	2652.42	-0.401874	0.115858	-3.46867	0.00052305	0.0111244	CA-CN
Macf1	36350	-0.454921	0.131214	-3.46701	0.00052628	0.0111616	CA-CN
Arhgdib	44153	0.298141	0.0861238	3.46177	0.00053664	0.0113493	CA-CN
Lnpep	9335.96	-0.490191	0.141705	-3.45924	0.0005417	0.0114243	CA-CN
Fam102b	13363.2	-0.274195	0.0793069	-3.45739	0.00054543	0.0114708	CA-CN
Xrn1	4658.23	-0.326133	0.0943529	-3.45652	0.00054719	0.0114758	CA-CN
Atg3	3131.19	0.329943	0.095508	3.45461	0.00055109	0.0114936	CA-CN
Pgap1	3459.67	-0.505062	0.146169	-3.45532	0.00054964	0.0114936	CA-CN
Eif2b2	2252.83	0.340441	0.0987839	3.44632	0.00056827	0.011819	CA-CN
Ak8	415.716	0.473467	0.137446	3.44474	0.00057161	0.0118559	CA-CN
Lsr	2721.14	0.385747	0.112137	3.43996	0.00058179	0.0120338	CA-CN
Zcchc11	1906.45	-0.319269	0.0930323	-3.43181	0.00059957	0.0123675	CA-CN
Tle1	893.345	-0.494577	0.144518	-3.42225	0.00062104	0.0127755	CA-CN
Pnkp	4466.23	0.333232	0.0974726	3.41873	0.00062914	0.0129038	CA-CN
Eif4ebp1	3863.02	0.286009	0.0836986	3.41713	0.00063284	0.0129038	CA-CN
Rrp1b	1353.95	0.340972	0.0997994	3.41658	0.00063413	0.0129038	CA-CN
Nfat5	5275.2	-0.353783	0.103511	-3.41784	0.0006312	0.0129038	CA-CN
Adgre4	11785.4	-0.296982	0.0869435	-3.41581	0.00063592	0.0129053	CA-CN
Tnfaip3	2549.05	-0.408475	0.119914	-3.40639	0.00065828	0.0133232	CA-CN
Tns3	10525.8	-0.281789	0.0828924	-3.39945	0.00067521	0.013629	CA-CN
Lyz1	1582.22	-0.649624	0.191411	-3.39387	0.00068913	0.0138631	CA-CN
Ly6a	228.466	-0.844569	0.249104	-3.39042	0.00069785	0.0138631	CA-CN
H2-T22	4414.39	-0.42763	0.126112	-3.39089	0.00069667	0.0138631	CA-CN
Mob1b	1553.46	-0.39578	0.116661	-3.39257	0.0006924	0.0138631	CA-CN
Kat6a	12676.8	-0.337271	0.0994467	-3.39147	0.00069518	0.0138631	CA-CN
Nlrx1	3885.4	0.329457	0.0971223	3.39218	0.00069339	0.0138631	CA-CN
Lpin1	2854.03	-0.542303	0.160035	-3.38866	0.00070235	0.0139158	CA-CN
Synj1	13297.8	-0.267	0.0789607	-3.38143	0.00072109	0.0142495	CA-CN
Vps13b	9013.19	-0.357111	0.105766	-3.37642	0.00073437	0.0144739	CA-CN
Zfp236	4231.62	-0.325815	0.0966333	-3.37166	0.00074716	0.014611	CA-CN
Gapvd1	5733.94	-0.259629	0.0769826	-3.37257	0.0007447	0.014611	CA-CN
Spred1	3012.59	-0.294154	0.0872614	-3.37095	0.00074909	0.014611	CA-CN
Helz2	13273	-0.461476	0.136861	-3.37186	0.00074662	0.014611	CA-CN
Nup98	6060.46	-0.297335	0.0883278	-3.36627	0.00076192	0.014823	CA-CN
Rps6ka3	8166.16	-0.297828	0.088622	-3.36066	0.00077757	0.0150884	CA-CN
Ranbp2	7268.61	-0.410496	0.12221	-3.35893	0.00078244	0.015144	CA-CN
Il4ra	10086.9	0.316404	0.0942546	3.3569	0.00078821	0.0152165	CA-CN
Plek	20362.5	-0.330811	0.098628	-3.35412	0.00079616	0.0153307	CA-CN
Dock10	20487.7	-0.297061	0.0886187	-3.35212	0.00080195	0.0154027	CA-CN
Cndp2	9862.94	0.265458	0.0792294	3.3505	0.00080665	0.0154145	CA-CN
Hmgb2	721.88	0.441723	0.131823	3.35088	0.00080555	0.0154145	CA-CN
Slfn5	57496.5	-0.365354	0.109371	-3.3405	0.00083629	0.0159403	CA-CN
Ifitm1	492.022	0.555525	0.166601	3.33447	0.00085461	0.0162485	CA-CN
Def8	2706.74	0.313286	0.0940004	3.33282	0.00085972	0.0163043	CA-CN
Auh	1360.72	0.385539	0.115757	3.33058	0.00086666	0.0163946	CA-CN
Maf	3750.28	-0.527615	0.158461	-3.32963	0.00086962	0.0164094	CA-CN
Gpr146	3388.62	0.481514	0.144658	3.32863	0.00087274	0.0164271	CA-CN
Mier3	1850.3	-0.378212	0.11372	-3.32583	0.00088156	0.0165518	CA-CN
Usp12	12155.7	-0.299508	0.0901207	-3.32341	0.00088925	0.0166547	CA-CN
Abhd11	1682.43	0.325549	0.0979952	3.32209	0.00089346	0.016692	CA-CN
Taldo1	28448.6	0.264631	0.0797016	3.32027	0.00089931	0.0167597	CA-CN
Trim30a	18968.6	-0.308171	0.0928957	-3.31739	0.00090863	0.0168915	CA-CN
Tomm70a	3811.36	-0.261737	0.0789238	-3.31633	0.00091208	0.016914	CA-CN
Usp6nl	1388.32	-0.368203	0.1112	-3.31117	0.00092907	0.0171867	CA-CN
Trim65	1410.14	-0.360873	0.109205	-3.30455	0.00095129	0.0175546	CA-CN
Marcks	18600.2	-0.265245	0.0805418	-3.29326	0.00099034	0.0182304	CA-CN
Prr14l	4040.62	-0.268546	0.0815758	-3.29198	0.00099486	0.018269	CA-CN
Naaa	22258.8	0.267373	0.0812655	3.29011	0.00100147	0.0183458	CA-CN
Cd69	481.294	-0.751757	0.228584	-3.28875	0.00100633	0.0183899	CA-CN
C5ar1	1566.36	0.602247	0.183291	3.28573	0.00101717	0.0184982	CA-CN
H2-Q6	265.653	-2.29489	0.698399	-3.28592	0.00101648	0.0184982	CA-CN
Rpn1	8549.27	0.258063	0.0786295	3.28202	0.00103067	0.0186986	CA-CN
H2-T9	4241.13	-0.417108	0.127156	-3.2803	0.00103699	0.0187679	CA-CN
Mvb12b	1018.76	0.478093	0.14584	3.27821	0.00104469	0.018862	CA-CN
Hmgcl	3677.27	0.282138	0.0861279	3.2758	0.00105362	0.0189777	CA-CN
Cd24a	567.423	0.692518	0.211472	3.27476	0.00105753	0.0190027	CA-CN
Naglu	1461.03	0.347928	0.106473	3.26775	0.00108405	0.0194328	CA-CN
Poll	717.779	0.408527	0.125141	3.26453	0.00109648	0.019609	CA-CN
Gpcpd1	6609.13	0.288068	0.0883699	3.25979	0.00111494	0.0198919	CA-CN
Alpk1	4631.08	-0.370519	0.113736	-3.25773	0.00112309	0.0198958	CA-CN
Selenom	285.658	0.578135	0.177448	3.25806	0.00112177	0.0198958	CA-CN
Tspo	11250.5	0.256396	0.078692	3.25823	0.00112111	0.0198958	CA-CN
H2-Q8	270.459	-2.29453	0.705157	-3.25392	0.00113823	0.0201168	CA-CN
Kmt2c	8816.96	-0.362097	0.111336	-3.25229	0.00114479	0.0201854	CA-CN
Cnot1	10582.8	-0.303995	0.0935169	-3.25069	0.00115125	0.0202517	CA-CN
Ankrd17	6706.91	-0.265803	0.0818534	-3.2473	0.00116505	0.0203992	CA-CN
5830432E09Rik	797.054	-0.384215	0.118299	-3.24784	0.00116286	0.0203992	CA-CN
Alg1	1830.38	0.289551	0.0892607	3.24388	0.00117912	0.0205976	CA-CN
Tspan17	1401.46	-0.359473	0.111046	-3.23716	0.00120727	0.0210407	CA-CN
Eipr1	1134.98	0.375773	0.116117	3.23616	0.00121149	0.0210654	CA-CN
Tnfrsf11a	1389.34	-0.338611	0.104697	-3.23419	0.00121988	0.0211624	CA-CN
Senp2	4208.2	-0.255938	0.0792368	-3.23004	0.00123775	0.021423	CA-CN
Tceal9	327.409	0.484967	0.15019	3.22903	0.00124211	0.0214493	CA-CN
Eps8	4622.13	0.371964	0.115449	3.22188	0.00127351	0.0218423	CA-CN
Lta4h	3304.05	0.299213	0.0928693	3.22187	0.00127358	0.0218423	CA-CN
Socs7	2505.06	-0.375696	0.116607	-3.22189	0.00127347	0.0218423	CA-CN
Il27	400.957	-0.618032	0.192188	-3.21577	0.00130095	0.0222611	CA-CN
Hip1	11460.3	-0.408559	0.127249	-3.21072	0.00132404	0.0226048	CA-CN
Med13	6973.84	-0.331065	0.103158	-3.20931	0.00133054	0.0226643	CA-CN
Ilf3	972.705	-0.429548	0.134074	-3.20381	0.00135624	0.0230499	CA-CN
Tmem248	4493.65	-0.259988	0.0814156	-3.19334	0.00140637	0.0237801	CA-CN
Ankle2	15335.2	-0.247478	0.0775098	-3.19287	0.00140868	0.0237801	CA-CN
Tet3	13059.6	-0.329268	0.103099	-3.19372	0.00140453	0.0237801	CA-CN
Ampd3	8347.34	0.231854	0.0726604	3.19093	0.00141818	0.0238336	CA-CN
Dennd2d	1073.62	0.433323	0.135791	3.1911	0.00141731	0.0238336	CA-CN
Pirb	33190.1	0.29666	0.0930496	3.18819	0.00143166	0.0240067	CA-CN
Cyld	5716.14	-0.245551	0.0771176	-3.1841	0.00145203	0.024294	CA-CN
Arhgap26	20566.3	0.325515	0.102366	3.17991	0.0014732	0.0245935	CA-CN
Nfxl1	2092.51	-0.311765	0.0980721	-3.17894	0.00147816	0.0246218	CA-CN
Cd3eap	951.898	0.354332	0.111604	3.1749	0.0014989	0.0248069	CA-CN
Sp1	11558.1	-0.281422	0.0886208	-3.17557	0.00149542	0.0248069	CA-CN
Rabggta	2415.62	0.288621	0.0909087	3.17485	0.00149916	0.0248069	CA-CN
Spryd3	2036.09	0.360841	0.113699	3.17365	0.00150536	0.0248549	CA-CN
Tnpo1	4631.73	-0.356911	0.112549	-3.17115	0.00151836	0.0249058	CA-CN
Ptgir	6271.03	-0.309908	0.0977079	-3.17178	0.00151509	0.0249058	CA-CN
Acsf3	595.717	0.396639	0.12506	3.17159	0.00151606	0.0249058	CA-CN
Pbxip1	13264.2	0.257792	0.0813829	3.16764	0.0015368	0.0251311	CA-CN
Gmppa	2303.36	0.296099	0.0935077	3.16657	0.00154249	0.0251311	CA-CN
Hpse	15245.2	-0.237286	0.074948	-3.16601	0.00154545	0.0251311	CA-CN
Zfp652	1679.18	-0.39707	0.125371	-3.16715	0.00153941	0.0251311	CA-CN
Ankib1	2793.67	-0.306479	0.0969784	-3.16028	0.00157615	0.0255751	CA-CN
Nfs1	1567.9	0.293928	0.0930425	3.15907	0.00158273	0.0256267	CA-CN
Abhd10	457.172	0.445472	0.141195	3.15502	0.00160484	0.0259025	CA-CN
Psmb6	3148.11	0.283385	0.0898297	3.1547	0.00160665	0.0259025	CA-CN
Sass6	966.262	-0.409284	0.1299	-3.15075	0.00162852	0.026199	CA-CN
Mpnd	2283.43	0.291025	0.0923858	3.15011	0.0016321	0.0262006	CA-CN
Mb21d1	1563.56	-0.35531	0.113081	-3.14209	0.00167749	0.026872	CA-CN
Aig1	336.648	0.552828	0.176266	3.13633	0.00171074	0.0273464	CA-CN
Cbl	11549.3	-0.455654	0.145372	-3.13441	0.00172201	0.0274682	CA-CN
9330133O14Rik	1110.21	0.432749	0.138362	3.12766	0.00176204	0.0279882	CA-CN
Anxa2	44846.4	0.268406	0.0858126	3.12781	0.00176115	0.0279882	CA-CN
Abhd8	491.738	0.448038	0.143383	3.12476	0.00177948	0.0282057	CA-CN
1110008P14Rik	792.524	0.352468	0.112835	3.12374	0.00178568	0.0282446	CA-CN
Mef2c	4942.3	-0.374265	0.119932	-3.12066	0.00180447	0.0284819	CA-CN
Fam208b	2234.54	-0.316433	0.101431	-3.1197	0.00181036	0.028515	CA-CN
Pltp	2297.08	-0.5325	0.170792	-3.11783	0.00182188	0.0286366	CA-CN
Stard3	5889.24	-0.28937	0.0929712	-3.11248	0.00185525	0.0291004	CA-CN
P2ry12	673.148	0.464291	0.149438	3.10691	0.00189053	0.0295921	CA-CN
Prkx	10495.7	-0.255303	0.0822126	-3.10539	0.00190025	0.0296211	CA-CN
Txn1	4876.49	0.319389	0.10284	3.10568	0.00189843	0.0296211	CA-CN
Pygl	18832.9	0.26967	0.0869397	3.1018	0.00192347	0.0297368	CA-CN
Ctsd	16718.3	0.325402	0.104856	3.10332	0.00191361	0.0297368	CA-CN
Swap70	3354.33	-0.25835	0.0832807	-3.10216	0.00192114	0.0297368	CA-CN
Smcr8	4705.96	-0.294588	0.0949437	-3.10277	0.0019172	0.0297368	CA-CN
Caprin1	11742.3	-0.227115	0.0733008	-3.09841	0.00194565	0.0300181	CA-CN
Hinfp	662.377	-0.438748	0.141652	-3.09736	0.00195256	0.030063	CA-CN
Kmt2d	21623.9	-0.353794	0.114273	-3.09604	0.00196122	0.0301348	CA-CN
Zswim6	5288.3	-0.29798	0.0964434	-3.08969	0.00200363	0.0305843	CA-CN
Mfsd7a	6482.91	0.253031	0.0819005	3.0895	0.00200495	0.0305843	CA-CN
Tpt1	6968.34	-0.321318	0.104012	-3.08923	0.00200673	0.0305843	CA-CN
Rnf114	10033.9	-0.29086	0.0941403	-3.08964	0.00200396	0.0305843	CA-CN
Socs4	1016.91	-0.432621	0.140084	-3.0883	0.00201307	0.0306191	CA-CN
Slc15a4	8103.57	-0.325259	0.105393	-3.08615	0.00202769	0.0306991	CA-CN
Rab27a	5158.1	0.3342	0.108305	3.08572	0.00203057	0.0306991	CA-CN
Nsd1	13883.8	-0.240611	0.0779481	-3.08681	0.00202319	0.0306991	CA-CN
Lrrc8c	3596.92	-0.367491	0.119155	-3.08416	0.00204129	0.0307994	CA-CN
Cep170	7146.57	-0.299277	0.0970823	-3.08271	0.00205125	0.0308878	CA-CN
Bdp1	3117.24	-0.35758	0.116047	-3.08134	0.00206072	0.0309683	CA-CN
Slc29a3	6936.97	-0.370715	0.12052	-3.07597	0.00209822	0.0314691	CA-CN
Nsd3	9895.17	-0.278081	0.0905751	-3.07017	0.00213934	0.032022	CA-CN
Glrx5	1069.12	0.318262	0.103702	3.06899	0.00214781	0.032085	CA-CN
Ifi47	11311.3	-0.840518	0.273962	-3.06801	0.00215488	0.0321183	CA-CN
Gfpt1	4624.59	-0.32211	0.105007	-3.0675	0.00215857	0.0321183	CA-CN
Oas2	11536.7	-0.45357	0.147955	-3.0656	0.00217235	0.0322596	CA-CN
Mtus1	14898.3	0.275483	0.0899139	3.06385	0.00218506	0.0323845	CA-CN
Cdk4	2632.61	0.272685	0.0892005	3.05699	0.00223572	0.0330455	CA-CN
Trim56	1878.32	-0.490039	0.16032	-3.05663	0.00223844	0.0330455	CA-CN
Hipk3	9124.96	-0.302979	0.0991672	-3.05523	0.00224886	0.0331344	CA-CN
Ifi205	2077.12	-1.27626	0.417812	-3.05463	0.00225335	0.0331356	CA-CN
Phka2	4218.76	-0.304183	0.0996194	-3.05345	0.00226223	0.0332014	CA-CN
Phf11a	683.051	-0.688475	0.225744	-3.0498	0.00228995	0.033436	CA-CN
Pak1ip1	2737.02	0.283863	0.0930822	3.04959	0.00229153	0.033436	CA-CN
Clec4e	2328.45	0.518723	0.170036	3.05067	0.00228334	0.033436	CA-CN
H2-D1	112442	-0.321065	0.105305	-3.04891	0.00229677	0.0334475	CA-CN
Dtx3	1299.36	0.395787	0.129893	3.04702	0.0023112	0.0335927	CA-CN
Camk1d	16005.4	-0.23982	0.0789604	-3.03722	0.00238774	0.0345718	CA-CN
Cyp4f18	11552.3	0.349709	0.115135	3.03738	0.00238644	0.0345718	CA-CN
Pym1	889.461	0.348434	0.114751	3.03645	0.00239385	0.0345936	CA-CN
Jund	8898.48	-0.431323	0.1421	-3.03534	0.00240265	0.0346543	CA-CN
Txndc12	1685.37	0.337016	0.111181	3.03125	0.00243546	0.0349935	CA-CN
Plekhf2	8879.93	-0.28431	0.0937844	-3.03153	0.00243319	0.0349935	CA-CN
Cnpy4	896.496	0.362445	0.119613	3.03016	0.00244427	0.0350531	CA-CN
Nrp1	15491.5	-0.336227	0.110995	-3.0292	0.002452	0.0350971	CA-CN
Myo5a	10692.2	-0.316666	0.104593	-3.0276	0.00246505	0.0351827	CA-CN
4931406P16Rik	2111.11	-0.33467	0.110612	-3.02561	0.00248134	0.0351827	CA-CN
Med14	3295.77	-0.27534	0.0909851	-3.0262	0.00247645	0.0351827	CA-CN
Tsc22d1	1442.68	-0.458653	0.15152	-3.02702	0.0024698	0.0351827	CA-CN
Mtif2	1237.18	0.312901	0.103407	3.02592	0.00247882	0.0351827	CA-CN
Fam96a	5732.38	0.358215	0.118507	3.02274	0.00250494	0.0353841	CA-CN
Frmd4b	2265.34	-0.499049	0.16508	-3.02307	0.00250223	0.0353841	CA-CN
Calhm2	6935.34	-0.238979	0.0790866	-3.02173	0.00251333	0.035436	CA-CN
Pdia6	7353.4	0.26771	0.0886208	3.02085	0.00252066	0.035473	CA-CN
Taok1	9894.32	-0.335183	0.111014	-3.01929	0.00253368	0.0355897	CA-CN
Gtf2h5	952.895	0.390504	0.129388	3.01808	0.00254383	0.0356657	CA-CN
Ndufb7	2160.35	0.275413	0.0913756	3.01408	0.00257761	0.0360721	CA-CN
Arsb	2459.22	-0.319568	0.106169	-3.01	0.0026125	0.036425	CA-CN
Btbd7	1910.04	-0.390921	0.129856	-3.01041	0.00260892	0.036425	CA-CN
Kpnb1	7966.35	-0.233812	0.0777431	-3.0075	0.0026341	0.036545	CA-CN
2500002B13Rik	173.121	0.7719	0.256674	3.00731	0.00263567	0.036545	CA-CN
Marcksl1	1453.18	-0.480157	0.159615	-3.00823	0.00262778	0.036545	CA-CN
Chid1	1816.47	0.288893	0.096119	3.00557	0.00265079	0.0366872	CA-CN
Foxred2	3160.22	-0.286723	0.0954736	-3.00317	0.00267186	0.0368877	CA-CN
Ticam1	2124.53	-0.317012	0.105572	-3.0028	0.00267508	0.0368877	CA-CN
Gnptab	6896.1	-0.245765	0.0819124	-3.00034	0.00269682	0.0371194	CA-CN
Plec	41512.7	-0.392425	0.130829	-2.99952	0.00270402	0.0371507	CA-CN
Ubxn8	2214.89	0.299896	0.100028	2.99812	0.00271652	0.0372544	CA-CN
Casp6	1377.01	0.409281	0.136556	2.99716	0.00272505	0.0372764	CA-CN
Acot13	445.614	0.415485	0.138642	2.99683	0.00272802	0.0372764	CA-CN
Prdx2	5206.39	0.259556	0.0866922	2.994	0.00275347	0.037556	CA-CN
Rfx2	6427.19	-0.391588	0.130995	-2.98934	0.00279577	0.0380533	CA-CN
Iqsec2	1885.75	-0.324559	0.108589	-2.98888	0.00280005	0.0380533	CA-CN
BC147527	3551.44	-0.334646	0.112027	-2.98719	0.00281556	0.0381952	CA-CN
Tesk1	2214.88	-0.314817	0.105445	-2.98561	0.00283009	0.0383233	CA-CN
Daam1	2131.21	-0.31504	0.105575	-2.98403	0.00284478	0.0384374	CA-CN
Itpr1	13293.5	-0.311455	0.104389	-2.98361	0.00284873	0.0384374	CA-CN
Plekhg1	3684.81	-0.262325	0.0880677	-2.97867	0.002895	0.0389919	CA-CN
Tlk2	2752.14	-0.280153	0.0941429	-2.97583	0.002922	0.0392852	CA-CN
Galns	4295.3	0.259541	0.0872592	2.97437	0.00293595	0.0394025	CA-CN
Fam160a2	3191.65	0.342156	0.115133	2.97183	0.00296027	0.0396582	CA-CN
Itgav	7501.3	-0.368441	0.124068	-2.96967	0.00298116	0.039867	CA-CN
Isoc1	5589.48	-0.242763	0.081842	-2.96624	0.00301464	0.0401721	CA-CN
Grk3	14480.6	-0.326325	0.109994	-2.96674	0.00300975	0.0401721	CA-CN
Map3k6	1020.31	0.53585	0.180868	2.96266	0.00304993	0.040499	CA-CN
Wasf2	16605.1	-0.279309	0.094265	-2.96302	0.00304636	0.040499	CA-CN
Mfsd14a	5154.2	-0.238837	0.0806507	-2.96138	0.00306265	0.0405964	CA-CN
Ncf4	11774.7	0.306776	0.10363	2.96031	0.00307332	0.0406661	CA-CN
Parp10	4017.51	-0.313274	0.105898	-2.95826	0.00309384	0.0408658	CA-CN
Ncoa1	8790.01	-0.234889	0.07944	-2.95681	0.00310836	0.0409857	CA-CN
Specc1l	4416.86	-0.318291	0.107676	-2.956	0.00311656	0.0410219	CA-CN
Rnf19b	9148.79	-0.394339	0.133434	-2.9553	0.00312362	0.0410432	CA-CN
Vps13d	6813.74	-0.283527	0.0959564	-2.95475	0.00312921	0.041045	CA-CN
Urod	1726.76	0.303099	0.102668	2.95222	0.00315496	0.0413108	CA-CN
Nfkbie	3558.46	-0.404702	0.13757	-2.94178	0.00326332	0.0426554	CA-CN
F13a1	124048	0.290536	0.0988223	2.93998	0.00328232	0.0428294	CA-CN
Rbm45	1155.36	0.28901	0.0984176	2.93657	0.00331869	0.0432291	CA-CN
Rapgef2	2897.69	-0.323199	0.110229	-2.93206	0.00336725	0.043556	CA-CN
Mtg1	474.953	0.427256	0.145757	2.93128	0.00337564	0.043556	CA-CN
Bbc3	1405.86	-0.490277	0.167168	-2.93284	0.00335881	0.043556	CA-CN
Gse1	4507.98	-0.361082	0.123237	-2.92998	0.00338985	0.043556	CA-CN
Ccdc125	2935.78	0.337939	0.115333	2.93013	0.00338825	0.043556	CA-CN
Ap5s1	912.431	0.413205	0.141001	2.93051	0.0033841	0.043556	CA-CN
Sgms1	3862.66	-0.307011	0.104726	-2.93157	0.00337255	0.043556	CA-CN
Sesn1	1840.51	-0.288879	0.098595	-2.92996	0.00339007	0.043556	CA-CN
Dynlrb1	2709.85	0.269382	0.0920638	2.92604	0.00343311	0.0440339	CA-CN
Tbl3	1264.32	0.381957	0.130735	2.92162	0.00348221	0.0445877	CA-CN
Prr5l	4523.19	-0.303781	0.104027	-2.9202	0.00349812	0.0447154	CA-CN
Fam8a1	361.553	-0.550089	0.18861	-2.91654	0.0035394	0.0451216	CA-CN
Got2	2076.13	0.271015	0.0929306	2.91632	0.00354189	0.0451216	CA-CN
Apc	5427.15	-0.324214	0.111196	-2.9157	0.00354895	0.0451352	CA-CN
Pkig	1636.76	-0.297311	0.102293	-2.90646	0.00365547	0.0464116	CA-CN
Rock2	4609	-0.340703	0.117305	-2.90442	0.00367932	0.0466334	CA-CN
Adnp	6155.33	-0.237849	0.0819064	-2.90391	0.00368533	0.0466334	CA-CN
Itsn2	6244.95	-0.302356	0.104156	-2.90293	0.00369685	0.0466389	CA-CN
Elf1	7228.59	-0.240168	0.082736	-2.90282	0.00369815	0.0466389	CA-CN
Ankrd46	1005.12	0.311691	0.107427	2.90141	0.00371483	0.0467709	CA-CN
Ndufb2	1040.65	0.31042	0.107063	2.89943	0.00373844	0.0469896	CA-CN
Rc3h2	4334.4	-0.303024	0.104538	-2.89869	0.00374724	0.0470217	CA-CN
Tcerg1	1950.71	-0.306555	0.105978	-2.89263	0.00382028	0.0478584	CA-CN
Ift20	1028.43	0.33844	0.117108	2.88999	0.0038525	0.0481819	CA-CN
Zfp467	1754.39	-0.371845	0.128711	-2.88899	0.00386487	0.0482564	CA-CN
Card9	8284.35	0.289189	0.100191	2.88638	0.00389699	0.0485769	CA-CN
Ebi3	2318.47	-0.304762	0.105628	-2.88524	0.0039111	0.0486722	CA-CN
Ankfy1	12962.2	-0.250162	0.0867427	-2.88395	0.00392718	0.0487916	CA-CN
Zcchc6	9818.68	-0.247686	0.0859795	-2.88076	0.00396715	0.0492071	CA-CN
Rhou	1948.12	0.373855	0.129868	2.87874	0.00399262	0.0494416	CA-CN
Dennd1a	5329.97	-0.238237	0.0827955	-2.87741	0.00400956	0.0495697	CA-CN
Rpain	629.965	0.417334	0.14512	2.87578	0.00403031	0.0497446	CA-CN
Rpn2	12211.1	0.243897	0.0848393	2.87481	0.00404274	0.0498163	CA-CN

## Sheet: Ly6chigh_padj<0.05
GENE	baseMean	log2FoldChange	lfcSE	stat	pvalue	padj	contrast
Lpl	7042.02	-1.70108	0.139407	-12.2023	3.02144e-34	2.27484e-30	CA-CN
Lcn2	303.176	2.53132	0.210411	12.0304	2.46085e-33	9.26388e-30	CA-CN
Mrc1	1805.83	-1.60126	0.14945	-10.7144	8.7135e-27	2.1868e-23	CA-CN
Ifit2	5138.08	-1.47345	0.142395	-10.3477	4.28879e-25	8.07257e-22	CA-CN
Ifit1bl1	1647.43	-1.47948	0.144588	-10.2324	1.41976e-24	2.13787e-21	CA-CN
Cd300lf	2195.38	0.956979	0.104418	9.1649	4.95948e-20	4.71204e-17	CA-CN
Klrk1	653.4	-1.6318	0.177825	-9.17641	4.45723e-20	4.71204e-17	CA-CN
Pbx1	5038.07	1.06636	0.116366	9.16387	5.00681e-20	4.71204e-17	CA-CN
Aplnr	749.27	-1.6013	0.182637	-8.76767	1.82401e-18	1.52589e-15	CA-CN
Gcnt2	5376.36	1.35574	0.155395	8.72442	2.67545e-18	2.01434e-15	CA-CN
Vcan	15441.2	1.20856	0.138752	8.71023	3.03248e-18	2.0756e-15	CA-CN
Cyp51	1843.45	-0.806506	0.0940294	-8.57717	9.72351e-18	6.10069e-15	CA-CN
Rsad2	5715	-1.24745	0.146195	-8.53279	1.42854e-17	8.27343e-15	CA-CN
Ifit3	3427.34	-1.45892	0.174468	-8.3621	6.16123e-17	3.31342e-14	CA-CN
C1rl	1328.39	1.09907	0.132098	8.32006	8.79173e-17	4.41286e-14	CA-CN
Ifit3b	685.954	-1.68954	0.210638	-8.02105	1.04845e-15	4.93362e-13	CA-CN
Slfn9	1341.13	-0.96693	0.121981	-7.92689	2.24711e-15	9.95205e-13	CA-CN
Hp	42033.6	0.602751	0.0798129	7.55205	4.28451e-14	1.79212e-11	CA-CN
Tmem268	5794.82	0.719137	0.0957627	7.50957	5.93217e-14	2.3507e-11	CA-CN
Serpina3g	334.005	-1.84237	0.247741	-7.43667	1.03252e-13	3.88692e-11	CA-CN
Prtn3	906.429	1.28992	0.17414	7.40737	1.28832e-13	4.52724e-11	CA-CN
Ifi208	647.015	-1.44467	0.195124	-7.40385	1.32287e-13	4.52724e-11	CA-CN
Arhgap31	4087.32	-0.700849	0.0960114	-7.29964	2.88531e-13	9.44501e-11	CA-CN
F10	11678.4	0.750158	0.10412	7.20475	5.81521e-13	1.82428e-10	CA-CN
Cmpk2	6098.15	-0.689293	0.0965879	-7.13643	9.5786e-13	2.77374e-10	CA-CN
Ptgfrn	1858.15	0.913055	0.127931	7.1371	9.53236e-13	2.77374e-10	CA-CN
Slpi	3347	0.897338	0.126639	7.08578	1.38263e-12	3.85549e-10	CA-CN
Btla	2300.09	-0.820877	0.116535	-7.04406	1.86712e-12	5.02054e-10	CA-CN
Parp14	24796.8	-0.56861	0.0813606	-6.98877	2.77315e-12	7.19968e-10	CA-CN
Nab2	757.248	-1.09178	0.156983	-6.95475	3.5319e-12	8.8639e-10	CA-CN
Parvg	2096.51	0.67122	0.0974889	6.8851	5.77489e-12	1.40255e-09	CA-CN
Gbp9	4194.33	-0.860042	0.126405	-6.80387	1.01847e-11	2.39626e-09	CA-CN
Itgb3	1818.11	-0.832358	0.122974	-6.76857	1.30059e-11	2.96732e-09	CA-CN
Lbp	569.203	1.14967	0.170204	6.75468	1.43149e-11	3.1699e-09	CA-CN
Slamf7	1807.18	-1.09006	0.162118	-6.72385	1.76981e-11	3.80712e-09	CA-CN
S100a8	116.082	2.25933	0.338182	6.68082	2.37617e-11	4.96949e-09	CA-CN
Ccr1	2646.77	1.13857	0.17307	6.57869	4.74613e-11	9.65774e-09	CA-CN
Ptgr1	942.558	0.903101	0.14017	6.4429	1.17215e-10	2.2915e-08	CA-CN
Tcf19	411.174	1.13549	0.176291	6.44099	1.18699e-10	2.2915e-08	CA-CN
Gm5431	2097.61	-0.85058	0.134832	-6.30846	2.81823e-10	5.30462e-08	CA-CN
Serinc3	69695.2	-0.460464	0.0734863	-6.26598	3.70481e-10	6.8033e-08	CA-CN
Ifit1	2712.51	-1.00201	0.166013	-6.03576	1.58214e-09	2.83044e-07	CA-CN
Nlrp1c-ps	736.349	-1.05739	0.175288	-6.03229	1.61653e-09	2.83044e-07	CA-CN
Mmp8	8258.22	0.76981	0.12795	6.01648	1.78254e-09	3.05018e-07	CA-CN
Tlr11	561.882	-1.33872	0.223307	-5.99496	2.03537e-09	3.4054e-07	CA-CN
Ctsl	1833.67	0.597109	0.100184	5.96014	2.52021e-09	4.12493e-07	CA-CN
Ier3	234.209	1.39318	0.235387	5.91868	3.24544e-09	5.01955e-07	CA-CN
Cd36	623.971	-1.25742	0.212448	-5.91871	3.24479e-09	5.01955e-07	CA-CN
Atp11a	5183.52	0.796055	0.134523	5.9176	3.26681e-09	5.01955e-07	CA-CN
Cfb	2602.39	-0.684017	0.115816	-5.90609	3.50328e-09	5.27524e-07	CA-CN
Siglece	2075.35	0.660668	0.112681	5.86317	4.54109e-09	6.7039e-07	CA-CN
Sqle	730.593	-0.777212	0.132916	-5.84741	4.99289e-09	7.22913e-07	CA-CN
Tarm1	742.746	1.28163	0.220927	5.80116	6.58597e-09	9.3558e-07	CA-CN
Gbp7	3920.04	-0.67422	0.117049	-5.76014	8.40464e-09	1.17183e-06	CA-CN
Mthfr	8017.25	-0.529876	0.0922416	-5.74443	9.22312e-09	1.24002e-06	CA-CN
Ifih1	7249.57	-0.57342	0.0997892	-5.74631	9.12125e-09	1.24002e-06	CA-CN
Znfx1	17669.5	-0.653277	0.113808	-5.74016	9.45884e-09	1.2494e-06	CA-CN
Jak3	3005.85	0.636603	0.112742	5.64655	1.63698e-08	2.12497e-06	CA-CN
Slc46a3	3578.75	-0.696769	0.124168	-5.61153	2.0055e-08	2.55922e-06	CA-CN
Galnt6	1931.44	0.743579	0.133094	5.58688	2.31184e-08	2.90097e-06	CA-CN
Zbtb16	1038.85	-0.768532	0.137819	-5.57638	2.45576e-08	3.03105e-06	CA-CN
Flot1	4117.45	0.69194	0.124458	5.55962	2.70356e-08	3.28308e-06	CA-CN
Lrg1	233.753	3.14816	0.567877	5.54373	2.96095e-08	3.53858e-06	CA-CN
Ctdspl	2921.33	0.88455	0.16137	5.48152	4.21694e-08	4.96084e-06	CA-CN
Akt3	5948.99	-0.518351	0.0946775	-5.47491	4.37724e-08	5.07019e-06	CA-CN
Il12rb2	581.905	-1.02444	0.187871	-5.45288	4.95605e-08	5.65365e-06	CA-CN
Zcchc2	5308.48	-0.437458	0.0816435	-5.35815	8.40774e-08	9.17418e-06	CA-CN
Mtss1	1852.95	-0.757142	0.141274	-5.35938	8.35099e-08	9.17418e-06	CA-CN
Klf16	937.968	-0.723701	0.13502	-5.35997	8.3235e-08	9.17418e-06	CA-CN
Slco3a1	1015.42	-0.826931	0.154551	-5.35053	8.76982e-08	9.43257e-06	CA-CN
Ifi30	32838.1	0.4686	0.0877265	5.3416	9.2129e-08	9.63388e-06	CA-CN
Ifi207	19946	-0.367687	0.0688342	-5.34163	9.2113e-08	9.63388e-06	CA-CN
Sema6b	626.11	0.971235	0.182019	5.33589	9.5076e-08	9.80585e-06	CA-CN
Phf11d	1056.26	-1.12552	0.211406	-5.32399	1.01515e-07	1.03284e-05	CA-CN
Gramd3	1066.74	-0.858848	0.161891	-5.30512	1.126e-07	1.13035e-05	CA-CN
Cyp39a1	1176.39	0.672232	0.12709	5.28943	1.227e-07	1.21554e-05	CA-CN
Gm12250	3692.7	-0.821019	0.155466	-5.28104	1.28454e-07	1.25601e-05	CA-CN
Flot2	6917.47	0.614836	0.116502	5.27749	1.30965e-07	1.25967e-05	CA-CN
Nt5c3	1844.76	-0.765902	0.145173	-5.2758	1.32175e-07	1.25967e-05	CA-CN
Tor3a	7843.33	-0.487516	0.0927803	-5.25452	1.48411e-07	1.39673e-05	CA-CN
Oasl2	17512.2	-0.70908	0.135051	-5.25046	1.51717e-07	1.41022e-05	CA-CN
Herc6	2619.19	-0.739454	0.142535	-5.18788	2.12702e-07	1.95297e-05	CA-CN
Stat2	14630.6	-0.557686	0.107788	-5.1739	2.29254e-07	2.06026e-05	CA-CN
Papd7	2691.66	-0.533121	0.10305	-5.17341	2.2986e-07	2.06026e-05	CA-CN
Ly9	4894.09	-0.476648	0.0922408	-5.16743	2.37336e-07	2.10224e-05	CA-CN
Clic4	2901.92	-0.580574	0.113996	-5.09292	3.52594e-07	3.08683e-05	CA-CN
Etnk1	8269.29	-0.431986	0.0850234	-5.08079	3.75865e-07	3.22515e-05	CA-CN
Ube2l6	3027.57	-0.661255	0.130162	-5.08024	3.76961e-07	3.22515e-05	CA-CN
Irgm2	5928.71	-0.793859	0.156546	-5.07109	3.95539e-07	3.34608e-05	CA-CN
Tef	1704.45	-0.654983	0.129487	-5.05829	4.23043e-07	3.53899e-05	CA-CN
Dhx40	4435.5	-0.421096	0.0837261	-5.02944	4.9191e-07	4.06988e-05	CA-CN
Slc16a6	2596.12	0.481186	0.0961323	5.00545	5.57306e-07	4.56082e-05	CA-CN
H2-T24	9294.29	-0.656239	0.131448	-4.99239	5.9636e-07	4.82795e-05	CA-CN
Hopx	7289.12	0.434344	0.087136	4.98466	6.20703e-07	4.97157e-05	CA-CN
Daxx	9182.8	-0.460259	0.0923751	-4.98251	6.27662e-07	4.97438e-05	CA-CN
Cds1	2111.68	-0.426831	0.085955	-4.96574	6.84387e-07	5.35964e-05	CA-CN
Nab1	5618.04	-0.392678	0.079105	-4.96401	6.9051e-07	5.35964e-05	CA-CN
Samd9l	12141.9	-0.716397	0.144946	-4.94252	7.71175e-07	5.92467e-05	CA-CN
Sfxn5	1103.81	0.609965	0.12354	4.93738	7.91793e-07	6.02163e-05	CA-CN
Elk4	2936.43	-0.613877	0.124803	-4.91879	8.70825e-07	6.5293e-05	CA-CN
Crybg1	9198.95	-0.395205	0.0803647	-4.91765	8.75893e-07	6.5293e-05	CA-CN
Ifi213	1239.24	-0.783155	0.159774	-4.90165	9.50359e-07	7.01495e-05	CA-CN
Socs1	311.63	-1.22518	0.250289	-4.89505	9.82793e-07	7.18305e-05	CA-CN
Stard4	1409.45	-0.503158	0.102829	-4.89318	9.92212e-07	7.18305e-05	CA-CN
Gngt2	6431.95	0.439697	0.090065	4.88199	1.05019e-06	7.53037e-05	CA-CN
AW011738	837.203	-0.734282	0.150577	-4.87646	1.08009e-06	7.67169e-05	CA-CN
Gpx3	1043.73	0.525388	0.107795	4.87396	1.09384e-06	7.69672e-05	CA-CN
Usp18	3230.91	-0.713884	0.146759	-4.86431	1.14856e-06	8.00696e-05	CA-CN
Fndc3a	8909.45	-0.452185	0.0931783	-4.8529	1.21671e-06	8.40422e-05	CA-CN
Abca9	14220.8	-0.417471	0.0861213	-4.84747	1.25043e-06	8.55862e-05	CA-CN
Abca6	2390.48	-0.474427	0.0979583	-4.84316	1.27792e-06	8.66796e-05	CA-CN
Rtl5	2020.81	-0.597851	0.123546	-4.83909	1.30436e-06	8.76835e-05	CA-CN
Id1	602.895	0.897932	0.185812	4.83249	1.34839e-06	8.98411e-05	CA-CN
Fgl2	16491.7	-0.512002	0.106161	-4.82286	1.41511e-06	9.34594e-05	CA-CN
Mmp19	2887.68	0.662696	0.137528	4.81861	1.4456e-06	9.4643e-05	CA-CN
Nr1d2	1136.04	-0.611573	0.127404	-4.80025	1.58465e-06	0.000102852	CA-CN
Abcb1b	933.148	-0.678039	0.141386	-4.79564	1.62157e-06	0.000104349	CA-CN
Camk2d	9096.42	0.484582	0.101183	4.78915	1.67491e-06	0.000106868	CA-CN
Mfsd13a	1063.66	0.504829	0.105612	4.78005	1.75252e-06	0.00011088	CA-CN
0610040J01Rik	1198.32	0.564372	0.118239	4.77315	1.81368e-06	0.000113793	CA-CN
Kctd12	31053.8	-0.417138	0.0874616	-4.76938	1.84791e-06	0.000114983	CA-CN
Pla2g7	13561.6	0.622505	0.130634	4.76524	1.88624e-06	0.000116406	CA-CN
4930523C07Rik	5005.2	-0.46571	0.0978331	-4.76025	1.93358e-06	0.000118357	CA-CN
Rab44	3130.83	0.518133	0.109205	4.74458	2.08941e-06	0.000126865	CA-CN
Tpst1	1653.91	-0.50984	0.107504	-4.74253	2.11068e-06	0.000127131	CA-CN
Galm	537.552	0.665911	0.140905	4.72595	2.29047e-06	0.000136865	CA-CN
Fam13b	2887.64	-0.399721	0.0848086	-4.71321	2.43841e-06	0.000144557	CA-CN
Oasl1	1652.54	-0.805519	0.17124	-4.70403	2.55072e-06	0.000147726	CA-CN
Serpinb8	1643.36	-0.576136	0.122413	-4.70649	2.52016e-06	0.000147726	CA-CN
Bmx	1626.67	0.769114	0.163463	4.70512	2.5372e-06	0.000147726	CA-CN
Hmgcs1	2490.84	-0.544022	0.115853	-4.69581	2.65556e-06	0.000152624	CA-CN
Cisd1	1252.06	0.481849	0.102709	4.69141	2.71324e-06	0.000154757	CA-CN
Isg15	2167.69	-0.761796	0.162964	-4.67463	2.94488e-06	0.000166707	CA-CN
Dnmt3a	2520.79	-0.647964	0.139085	-4.65878	3.18087e-06	0.000178722	CA-CN
Ddx58	7068.43	-0.601298	0.129377	-4.64764	3.35757e-06	0.000187253	CA-CN
Spink2	118.2	1.33819	0.289428	4.62356	3.77203e-06	0.000208821	CA-CN
Hmgcr	3817.73	-0.40854	0.0886408	-4.60894	4.04727e-06	0.000222423	CA-CN
Irf7	21068	-0.642235	0.139431	-4.60611	4.10267e-06	0.000223833	CA-CN
Ifi209	19795.2	-0.534746	0.116352	-4.59593	4.30818e-06	0.000231688	CA-CN
Cep192	2689.3	-0.419675	0.0912877	-4.59728	4.28042e-06	0.000231688	CA-CN
Tspan32	787.124	0.5634	0.12276	4.58943	4.44459e-06	0.000237328	CA-CN
Mov10	1586.86	-0.541466	0.118324	-4.57612	4.73673e-06	0.000251147	CA-CN
H1f0	3695.21	0.686898	0.150297	4.57026	4.87115e-06	0.000256468	CA-CN
Jun	754.785	-0.893465	0.196297	-4.55159	5.32408e-06	0.000278368	CA-CN
Cdk20	403.33	0.773374	0.170354	4.53979	5.63103e-06	0.000292386	CA-CN
Dtx3l	16989	-0.419849	0.0926198	-4.53303	5.81432e-06	0.000299836	CA-CN
Gda	39679.8	0.430388	0.0950565	4.52771	5.96257e-06	0.000305389	CA-CN
Trem3	954.299	0.642987	0.142057	4.52626	6.00376e-06	0.000305421	CA-CN
Kbtbd11	4831.05	-0.599666	0.132564	-4.52361	6.07937e-06	0.000307192	CA-CN
F11r	972.402	2.31329	0.511568	4.52196	6.12709e-06	0.000307539	CA-CN
Mob1a	10364.6	-0.397017	0.0880043	-4.51134	6.4419e-06	0.000321199	CA-CN
Nr3c1	8014.61	-0.390517	0.0866541	-4.50661	6.58701e-06	0.000326274	CA-CN
Calcrl	1131.58	-0.443683	0.0990846	-4.47782	7.5408e-06	0.000371076	CA-CN
Il15	918.257	-0.644058	0.14424	-4.46518	8.00031e-06	0.000391132	CA-CN
Nme1	1791.14	0.488225	0.109643	4.45285	8.47363e-06	0.0004116	CA-CN
Stat1	28994.4	-0.665564	0.149728	-4.44516	8.78253e-06	0.00042387	CA-CN
Dyrk2	2078.92	-0.585658	0.132552	-4.41832	9.9473e-06	0.000477027	CA-CN
Phactr2	5056.76	-0.381878	0.0865959	-4.40988	1.03428e-05	0.000486691	CA-CN
Slc25a22	3179.88	-0.433142	0.0982192	-4.40996	1.03391e-05	0.000486691	CA-CN
Trim30d	5668.02	-0.461249	0.104548	-4.41183	1.02501e-05	0.000486691	CA-CN
Slc30a1	3626.61	-0.386391	0.0876758	-4.40704	1.04792e-05	0.000490051	CA-CN
Frmd4a	6192.89	-0.415136	0.0942593	-4.40419	1.0618e-05	0.000493474	CA-CN
Tap1	17062.5	-0.546376	0.124277	-4.39642	1.10051e-05	0.000508326	CA-CN
Ccdc50	15473.9	-0.369552	0.0841776	-4.39014	1.13276e-05	0.000520035	CA-CN
Ahnak	307512	-0.423394	0.0966504	-4.38067	1.18313e-05	0.000539866	CA-CN
Csf2rb2	6864.14	0.392338	0.0897078	4.37352	1.22261e-05	0.00055452	CA-CN
Cxcl10	1240.45	-1.62603	0.372816	-4.36149	1.29178e-05	0.000582386	CA-CN
Atf7	7273.72	-0.356227	0.0818047	-4.3546	1.33307e-05	0.000590395	CA-CN
Nectin1	3896.02	-0.365067	0.0838246	-4.35513	1.3299e-05	0.000590395	CA-CN
Myof	8435.43	-0.545697	0.125272	-4.35608	1.32413e-05	0.000590395	CA-CN
Ddx60	1220.72	-0.693729	0.159755	-4.34245	1.40901e-05	0.000620377	CA-CN
Emilin1	4566.41	0.505477	0.116452	4.34065	1.42063e-05	0.000621855	CA-CN
Oas3	15472.2	-0.706421	0.162879	-4.3371	1.44377e-05	0.000628331	CA-CN
Ago2	5745.2	-0.560738	0.129525	-4.32917	1.4967e-05	0.000647623	CA-CN
C5ar2	723.98	0.927642	0.214376	4.32717	1.51039e-05	0.000649813	CA-CN
Gpr15	500.829	0.644073	0.1492	4.31683	1.58284e-05	0.000676125	CA-CN
Bcl3	5465.52	0.362979	0.0841027	4.3159	1.58951e-05	0.000676125	CA-CN
Parp12	8465.96	-0.470726	0.109437	-4.30133	1.69779e-05	0.000714114	CA-CN
Nxpe5	529.801	0.578542	0.134476	4.30219	1.69115e-05	0.000714114	CA-CN
Cdk6	2474.51	-0.574801	0.134328	-4.27908	1.8767e-05	0.000784982	CA-CN
Ifi211	4121.16	-0.514091	0.120524	-4.26548	1.99477e-05	0.000829756	CA-CN
Sdf2l1	2142.18	0.406992	0.0956661	4.2543	2.09705e-05	0.00086751	CA-CN
Usp9x	6046.24	-0.4848	0.11413	-4.24778	2.15895e-05	0.000888238	CA-CN
Ldha	8730.77	0.379931	0.0895791	4.24129	2.22234e-05	0.000909349	CA-CN
Insl3	171.733	0.933175	0.220123	4.23934	2.24181e-05	0.000912358	CA-CN
Skint3	3532.39	-0.406687	0.0959658	-4.23783	2.25688e-05	0.00091355	CA-CN
Cd2	222.824	1.0542	0.249061	4.23271	2.30888e-05	0.000929603	CA-CN
Srebf2	9861.62	-0.472049	0.11156	-4.23133	2.32311e-05	0.000930357	CA-CN
Nampt	7220.32	-0.406878	0.0962593	-4.22689	2.36939e-05	0.000938902	CA-CN
Gsdme	532.177	0.54642	0.129255	4.22745	2.36356e-05	0.000938902	CA-CN
Tlr7	14686	-0.332229	0.0788528	-4.21329	2.51682e-05	0.000992102	CA-CN
Cbr3	284.33	0.67414	0.161187	4.18234	2.8853e-05	0.00113143	CA-CN
Camkk2	25643.7	-0.339034	0.0812748	-4.17146	3.02655e-05	0.00117458	CA-CN
Bbx	3097.76	-0.488071	0.116984	-4.1721	3.01799e-05	0.00117458	CA-CN
Rnf214	1679.35	-0.449833	0.108089	-4.16168	3.15919e-05	0.00121977	CA-CN
Gsr	52999.2	0.391454	0.0941661	4.15706	3.22373e-05	0.00123834	CA-CN
Parp11	2161.03	-0.518128	0.124805	-4.15149	3.30311e-05	0.00126239	CA-CN
Irf4	8718.71	-0.504756	0.122103	-4.13386	3.56715e-05	0.00135642	CA-CN
Cdkn2d	3587.25	0.635029	0.153664	4.13259	3.58698e-05	0.0013571	CA-CN
Aff1	4592.94	-0.389751	0.0943395	-4.13136	3.60623e-05	0.00135757	CA-CN
Ppp1r3d	720.509	0.619734	0.150554	4.11637	3.84893e-05	0.00143459	CA-CN
Rrad	341.388	-0.732642	0.177975	-4.11655	3.84584e-05	0.00143459	CA-CN
Tor1aip2	6194.17	-0.40022	0.0977612	-4.09386	4.24257e-05	0.0015506	CA-CN
Setdb2	1793.56	-0.479035	0.116991	-4.09463	4.2285e-05	0.0015506	CA-CN
Serpinb1a	980.08	0.708142	0.172919	4.09522	4.21776e-05	0.0015506	CA-CN
Msrb1	32051.7	0.344963	0.0842055	4.09667	4.19127e-05	0.0015506	CA-CN
Cd164	3862.77	-0.428368	0.105155	-4.07369	4.6275e-05	0.00167993	CA-CN
Rab36	2325.2	0.526238	0.129201	4.073	4.64106e-05	0.00167993	CA-CN
Dennd1b	3243.67	-0.504841	0.124011	-4.07094	4.68247e-05	0.00168681	CA-CN
S100a11	5746.96	0.49799	0.122813	4.05486	5.0164e-05	0.0017985	CA-CN
Acp5	814.965	0.653554	0.161415	4.04889	5.14609e-05	0.00183185	CA-CN
Fam49a	16067.5	-0.305999	0.0755862	-4.04835	5.15808e-05	0.00183185	CA-CN
Med30	913.462	0.542604	0.134417	4.03673	5.42024e-05	0.00190696	CA-CN
Nfil3	3601.36	0.452904	0.112179	4.03732	5.40643e-05	0.00190696	CA-CN
Atf6	12319.3	-0.338538	0.0840638	-4.02716	5.64555e-05	0.00195877	CA-CN
Lcp1	63748.9	0.338213	0.0839783	4.02738	5.64013e-05	0.00195877	CA-CN
Sh2d1b1	746.572	0.553942	0.13752	4.02809	5.62313e-05	0.00195877	CA-CN
Kmt2a	6548.94	-0.400544	0.0995319	-4.02428	5.71492e-05	0.00197374	CA-CN
Pml	6495.96	-0.613561	0.152679	-4.01864	5.85361e-05	0.00200326	CA-CN
Slfn8	9847.34	-0.375319	0.0933711	-4.01965	5.82858e-05	0.00200326	CA-CN
Id2	3104.83	0.73611	0.18331	4.01566	5.92802e-05	0.00201317	CA-CN
Smchd1	8778.97	-0.350826	0.0873715	-4.01534	5.93603e-05	0.00201317	CA-CN
Hivep1	4143.28	-0.511417	0.127493	-4.01134	6.03761e-05	0.00203844	CA-CN
Lmtk2	1851.79	-0.73463	0.183455	-4.00442	6.21704e-05	0.00208036	CA-CN
Lacc1	1336.25	-0.689955	0.172265	-4.0052	6.19649e-05	0.00208036	CA-CN
Scp2	3611.18	0.405309	0.101541	3.99156	6.5639e-05	0.00217974	CA-CN
Agrn	2562.92	-0.609401	0.152683	-3.99127	6.57194e-05	0.00217974	CA-CN
Sppl2a	18080	-0.287844	0.0721463	-3.98973	6.61489e-05	0.00218436	CA-CN
Ifi203	18861.4	-0.540044	0.135442	-3.98728	6.68363e-05	0.00219743	CA-CN
Tgtp2	793.639	-1.97176	0.49623	-3.97348	7.08304e-05	0.00231862	CA-CN
BC005537	32017.8	-0.275339	0.0693444	-3.9706	7.16922e-05	0.00232347	CA-CN
Stap1	921.317	-0.494061	0.124484	-3.96887	7.2213e-05	0.00232347	CA-CN
Alox5	749.131	-0.545974	0.137504	-3.97059	7.16935e-05	0.00232347	CA-CN
Dhrs1	3477.38	0.326127	0.0821508	3.96985	7.19174e-05	0.00232347	CA-CN
Nlrc5	8772.34	-0.625049	0.157773	-3.9617	7.44176e-05	0.00238421	CA-CN
Smg1	14494.1	-0.409709	0.103582	-3.9554	7.64078e-05	0.0024376	CA-CN
Irgm1	9401.1	-0.632868	0.160066	-3.9538	7.69202e-05	0.00244359	CA-CN
Apoc2	4602.35	0.397105	0.100841	3.93792	8.21926e-05	0.00260012	CA-CN
Trim36	1106.42	-0.462137	0.117545	-3.93158	8.43898e-05	0.00265846	CA-CN
Dennd4c	2149.25	-0.476307	0.121297	-3.92678	8.60919e-05	0.00270078	CA-CN
Fam26f	1839.17	-0.574538	0.146747	-3.91515	9.03492e-05	0.00282257	CA-CN
Aars	2037.93	0.37943	0.0969758	3.91263	9.12968e-05	0.00284039	CA-CN
Ppp2cb	6353.84	0.389409	0.0995825	3.91041	9.21382e-05	0.00285477	CA-CN
Tcf20	5689.11	-0.361816	0.0927405	-3.90138	9.5644e-05	0.00295124	CA-CN
Parp9	7471.31	-0.320384	0.0822053	-3.89736	9.72466e-05	0.00298845	CA-CN
Rasa4	9460.36	-0.454214	0.116749	-3.89052	0.000100028	0.00304905	CA-CN
Cep350	9311.05	-0.440631	0.113238	-3.8912	9.97505e-05	0.00304905	CA-CN
Rufy3	1900.16	-0.413883	0.106452	-3.88796	0.000101092	0.00306904	CA-CN
Socs6	3001.06	-0.430053	0.110725	-3.88397	0.000102765	0.0031073	CA-CN
H2-K1	65626.7	-0.485534	0.125342	-3.87367	0.000107209	0.0032287	CA-CN
Lrch3	3990.48	-0.334553	0.0863933	-3.87245	0.000107749	0.00323203	CA-CN
Ms4a4a	7228.61	0.440651	0.114064	3.86319	0.000111918	0.00334377	CA-CN
Jaml	1631.36	0.640589	0.166198	3.85437	0.000116027	0.00345285	CA-CN
Atp8b2	4713.1	-0.303436	0.0787657	-3.85239	0.000116969	0.00346718	CA-CN
Gm14005	710.876	0.461274	0.119854	3.84864	0.000118777	0.00350694	CA-CN
Gm45935	1994.12	-0.440557	0.114553	-3.84588	0.000120122	0.0035328	CA-CN
Wnk1	12508.6	-0.356125	0.0927908	-3.83794	0.000124072	0.00363478	CA-CN
Lonp2	2848.24	0.343213	0.0894773	3.83575	0.00012518	0.00365304	CA-CN
Lgals1	6890.11	0.455146	0.118788	3.83159	0.000127319	0.00370111	CA-CN
Pi16	9705.77	0.375439	0.0981327	3.82583	0.000130331	0.0037741	CA-CN
Plxnc1	2772.4	-0.382534	0.100265	-3.81525	0.000136045	0.00391626	CA-CN
Ifi204	18589	-0.38375	0.100595	-3.81482	0.000136281	0.00391626	CA-CN
Dcp2	5743.85	-0.305247	0.0800639	-3.81255	0.000137542	0.00393745	CA-CN
Atf7ip	7163.92	-0.355857	0.0937074	-3.79754	0.000146142	0.00416782	CA-CN
Eif2ak2	8575.31	-0.345521	0.0911241	-3.79176	0.000149581	0.00424979	CA-CN
Isg20	1179.49	-0.599649	0.158493	-3.78343	0.00015468	0.00437814	CA-CN
Cd84	11621.1	-0.293549	0.0776202	-3.78187	0.000155656	0.00438925	CA-CN
Nlrp1b	1936.95	-0.499749	0.132281	-3.77794	0.000158132	0.00442593	CA-CN
Jak2	5654.62	-0.300058	0.0794236	-3.77795	0.000158126	0.00442593	CA-CN
Tgfbi	95641.1	0.323313	0.0860385	3.75777	0.000171433	0.00478043	CA-CN
Ldlr	12345.5	-0.439619	0.11706	-3.75551	0.000172991	0.0048061	CA-CN
Birc6	12326.8	-0.358484	0.0956365	-3.74841	0.000177961	0.00490813	CA-CN
Csf2rb	28061.1	0.298616	0.079665	3.7484	0.000177968	0.00490813	CA-CN
Entpd1	2672.26	-0.387116	0.103312	-3.74706	0.000178916	0.00491627	CA-CN
Met	4593.95	-0.379145	0.101363	-3.74046	0.000183683	0.00502892	CA-CN
Dhcr24	1498.96	-0.484728	0.129712	-3.73695	0.000186269	0.00506289	CA-CN
Cmtm3	5487.43	-0.337978	0.0904251	-3.73766	0.00018574	0.00506289	CA-CN
Lgals3bp	14443	-0.534014	0.143024	-3.73375	0.000188653	0.00510924	CA-CN
Cd302	5133.09	0.490882	0.13151	3.73265	0.000189477	0.00511317	CA-CN
Mndal	9645.32	-0.401181	0.107849	-3.71985	0.000199339	0.00536009	CA-CN
Dock7	2520.98	-0.395435	0.106454	-3.7146	0.000203523	0.00545312	CA-CN
Uqcc2	946.061	0.417582	0.112684	3.70579	0.00021073	0.00562619	CA-CN
Syne3	5377.82	-0.423282	0.114279	-3.70392	0.000212292	0.00564786	CA-CN
Krtcap2	1794.59	0.444548	0.120165	3.69948	0.000216039	0.00572731	CA-CN
Ash1l	4569.03	-0.35356	0.0956199	-3.69755	0.000217687	0.00575077	CA-CN
Olfm1	8778.2	0.454418	0.12298	3.69505	0.000219842	0.00578737	CA-CN
Rasgef1b	499.743	-0.89673	0.242743	-3.69416	0.000220617	0.00578755	CA-CN
Traf3	6004.72	-0.387427	0.104938	-3.69195	0.000222538	0.00579755	CA-CN
D17Wsu92e	13662.7	-0.337897	0.0915007	-3.69283	0.000221771	0.00579755	CA-CN
Mt1	135.047	1.0664	0.289296	3.68619	0.000227633	0.0058895	CA-CN
Vcl	10083.5	-0.344489	0.0934384	-3.6868	0.000227088	0.0058895	CA-CN
Arhgap24	753.919	0.525674	0.142789	3.68147	0.000231895	0.00595884	CA-CN
Gm1966	33531.9	-0.398778	0.108305	-3.682	0.000231412	0.00595884	CA-CN
Phpt1	254.071	0.615011	0.167359	3.67481	0.000238031	0.00608926	CA-CN
Zbp1	10988.2	-0.440223	0.119814	-3.67421	0.000238588	0.00608926	CA-CN
Mx2	1407.97	-0.48123	0.131324	-3.66445	0.000247868	0.00630473	CA-CN
Vcpip1	8139.98	-0.323961	0.0885661	-3.65784	0.000254351	0.00642621	CA-CN
Herc1	8279.99	-0.343784	0.0939643	-3.65867	0.000253532	0.00642621	CA-CN
Mx1	9069.79	-0.513069	0.140654	-3.64775	0.000264552	0.00666157	CA-CN
Dnajb9	1152.11	-0.425841	0.116957	-3.64099	0.000271593	0.00681608	CA-CN
Anxa3	2495.07	-0.527671	0.144999	-3.63914	0.000273551	0.00684241	CA-CN
Rel	2408.35	-0.572016	0.157276	-3.63702	0.00027581	0.00686787	CA-CN
Zfp800	1891.31	-0.423717	0.116519	-3.63648	0.000276393	0.00686787	CA-CN
Zfyve19	691.344	0.457414	0.125973	3.63106	0.000282261	0.00699059	CA-CN
Ino80d	5817.2	-0.381997	0.105234	-3.62999	0.000283434	0.00699665	CA-CN
Sbno2	20383.9	0.327579	0.0903247	3.62668	0.000287084	0.00706359	CA-CN
Sik2	1752.98	-0.361979	0.0999566	-3.62136	0.000293061	0.00718715	CA-CN
Rab24	3187.58	0.359201	0.0993351	3.61605	0.000299128	0.00731211	CA-CN
Stxbp2	8249.9	0.297097	0.082188	3.61485	0.000300523	0.00732244	CA-CN
Tmem198b	1505.8	0.516981	0.143133	3.6119	0.00030396	0.00737048	CA-CN
Ncoa7	3036.43	-0.416447	0.115312	-3.61148	0.000304452	0.00737048	CA-CN
Nod1	11711.9	-0.343739	0.0952109	-3.61029	0.000305855	0.00738072	CA-CN
Insig1	2099.99	-0.526641	0.146322	-3.59919	0.000319213	0.00767141	CA-CN
Rtp4	4047.62	-0.618551	0.171887	-3.5986	0.000319939	0.00767141	CA-CN
9930111J21Rik1	2898.47	-0.661257	0.184186	-3.59016	0.000330477	0.00789893	CA-CN
D17H6S56E-5	2459.31	-0.445513	0.124658	-3.57389	0.000351712	0.00837986	CA-CN
Fcnb	279.819	0.981899	0.27517	3.56833	0.000359258	0.00853266	CA-CN
H2-T23	15321.6	-0.362635	0.101798	-3.5623	0.000367625	0.00867664	CA-CN
Mcemp1	8453.25	0.476225	0.133668	3.56274	0.000367002	0.00867664	CA-CN
Epsti1	9594.96	-0.33546	0.0944599	-3.55135	0.000383263	0.00901747	CA-CN
Zc3hav1	12797.7	-0.294906	0.0831226	-3.54784	0.000388397	0.00910979	CA-CN
Mycbp2	28035.9	-0.320311	0.0903354	-3.5458	0.000391429	0.00912253	CA-CN
Rnf144b	1676.94	-0.417353	0.117686	-3.54634	0.000390626	0.00912253	CA-CN
Brpf3	2163.96	-0.368966	0.10408	-3.54503	0.000392576	0.00912253	CA-CN
Gm44805	4014.81	0.380692	0.107652	3.53631	0.00040576	0.00939989	CA-CN
Batf	949.795	0.439642	0.12447	3.5321	0.000412271	0.00946978	CA-CN
Tor1aip1	17938.4	-0.257903	0.0730011	-3.53287	0.000411081	0.00946978	CA-CN
Cdk5rap3	2412.27	0.321809	0.0911144	3.53192	0.00041255	0.00946978	CA-CN
Arsi	736.848	-0.442511	0.125472	-3.52676	0.000420676	0.00962695	CA-CN
Zbed6	2971.85	-0.496205	0.140843	-3.52311	0.000426507	0.00970143	CA-CN
Pycr2	1415.38	0.342936	0.0973371	3.52318	0.000426404	0.00970143	CA-CN
Mga	4206.87	-0.376961	0.107089	-3.52009	0.000431406	0.0097833	CA-CN
Gbp3	5811.79	-0.520394	0.148015	-3.51582	0.000438398	0.00988232	CA-CN
Naa25	1956.95	-0.322852	0.091809	-3.51656	0.00043718	0.00988232	CA-CN
Rassf4	72729.5	-0.271131	0.0771399	-3.5148	0.000440084	0.00989072	CA-CN
Kcnab2	11672.1	0.317212	0.0903355	3.51148	0.000445611	0.00995552	CA-CN
Bach1	25130.2	-0.315956	0.089959	-3.51222	0.000444374	0.00995552	CA-CN
Pik3ap1	4350.44	-0.515609	0.147105	-3.50505	0.000456519	0.0100902	CA-CN
Ppil1	446.245	0.509254	0.145271	3.50554	0.000455685	0.0100902	CA-CN
Kpna4	4821	-0.285898	0.0815738	-3.50477	0.000456999	0.0100902	CA-CN
Ptprj	25082.1	-0.478731	0.136572	-3.50532	0.000456052	0.0100902	CA-CN
Cpq	674.706	-0.426733	0.12185	-3.50213	0.000461558	0.010161	CA-CN
Tdrd7	6710.44	-0.300774	0.0859936	-3.49763	0.000469412	0.0103038	CA-CN
B4galt6	2254.54	0.373582	0.106946	3.49319	0.00047728	0.010446	CA-CN
Aatk	1680.58	0.497763	0.142639	3.48968	0.000483608	0.0105539	CA-CN
Gls	6430.07	-0.31799	0.0911807	-3.48747	0.000487612	0.0106105	CA-CN
S100a1	757.781	0.467472	0.134225	3.48275	0.0004963	0.0107684	CA-CN
Ascc3	2952.28	-0.362794	0.10421	-3.48138	0.00049884	0.0107924	CA-CN
Id3	260.695	0.697808	0.200587	3.47883	0.000503599	0.0108023	CA-CN
Sun2	9223.12	-0.329983	0.0948522	-3.47892	0.000503438	0.0108023	CA-CN
Ankhd1	6395.73	-0.305378	0.0877546	-3.47991	0.000501584	0.0108023	CA-CN
Nfe2l1	5003.95	-0.287998	0.082974	-3.47094	0.000518634	0.0110617	CA-CN
4932438A13Rik	4154.49	-0.433471	0.124863	-3.47157	0.000517429	0.0110617	CA-CN
Pgap2	2652.42	-0.401874	0.115858	-3.46867	0.00052305	0.0111244	CA-CN
Macf1	36350	-0.454921	0.131214	-3.46701	0.000526282	0.0111616	CA-CN
Arhgdib	44153	0.298141	0.0861238	3.46177	0.000536639	0.0113493	CA-CN
Lnpep	9335.96	-0.490191	0.141705	-3.45924	0.000541701	0.0114243	CA-CN
Fam102b	13363.2	-0.274195	0.0793069	-3.45739	0.000545433	0.0114708	CA-CN
Xrn1	4658.23	-0.326133	0.0943529	-3.45652	0.000547191	0.0114758	CA-CN
Atg3	3131.19	0.329943	0.095508	3.45461	0.000551095	0.0114936	CA-CN
Pgap1	3459.67	-0.505062	0.146169	-3.45532	0.000549636	0.0114936	CA-CN
Eif2b2	2252.83	0.340441	0.0987838	3.44632	0.000568268	0.011819	CA-CN
Ak8	415.716	0.473467	0.137446	3.44474	0.000571615	0.0118559	CA-CN
Lsr	2721.14	0.385747	0.112137	3.43996	0.000581791	0.0120338	CA-CN
Zcchc11	1906.45	-0.319269	0.0930323	-3.43181	0.000599568	0.0123675	CA-CN
Tle1	893.345	-0.494577	0.144518	-3.42225	0.000621044	0.0127755	CA-CN
Pnkp	4466.23	0.333232	0.0974726	3.41873	0.000629142	0.0129038	CA-CN
Eif4ebp1	3863.02	0.286009	0.0836987	3.41713	0.000632844	0.0129038	CA-CN
Rrp1b	1353.95	0.340972	0.0997994	3.41658	0.000634133	0.0129038	CA-CN
Nfat5	5275.2	-0.353783	0.103511	-3.41784	0.000631205	0.0129038	CA-CN
Adgre4	11785.4	-0.296982	0.0869434	-3.41581	0.000635921	0.0129053	CA-CN
Tnfaip3	2549.05	-0.408475	0.119914	-3.40639	0.000658284	0.0133232	CA-CN
Tns3	10525.8	-0.281789	0.0828924	-3.39945	0.000675205	0.013629	CA-CN
Lyz1	1582.22	-0.649624	0.191411	-3.39387	0.000689133	0.0138631	CA-CN
Ly6a	228.466	-0.844569	0.249104	-3.39042	0.000697848	0.0138631	CA-CN
H2-T22	4414.39	-0.42763	0.126112	-3.39089	0.00069667	0.0138631	CA-CN
Mob1b	1553.46	-0.39578	0.116661	-3.39257	0.000692396	0.0138631	CA-CN
Kat6a	12676.8	-0.337271	0.0994467	-3.39147	0.000695182	0.0138631	CA-CN
Nlrx1	3885.4	0.329457	0.0971223	3.39218	0.000693385	0.0138631	CA-CN
Lpin1	2854.03	-0.542303	0.160035	-3.38866	0.000702352	0.0139158	CA-CN
Synj1	13297.8	-0.267	0.0789607	-3.38143	0.000721088	0.0142495	CA-CN
Vps13b	9013.19	-0.357111	0.105766	-3.37642	0.000734366	0.0144739	CA-CN
Zfp236	4231.62	-0.325815	0.0966333	-3.37166	0.000747158	0.014611	CA-CN
Gapvd1	5733.94	-0.259629	0.0769826	-3.37257	0.000744702	0.014611	CA-CN
Spred1	3012.59	-0.294154	0.0872614	-3.37095	0.000749085	0.014611	CA-CN
Helz2	13273	-0.461476	0.136861	-3.37186	0.000746621	0.014611	CA-CN
Nup98	6060.46	-0.297335	0.0883278	-3.36627	0.000761918	0.014823	CA-CN
Rps6ka3	8166.16	-0.297828	0.088622	-3.36066	0.000777569	0.0150884	CA-CN
Ranbp2	7268.61	-0.410496	0.12221	-3.35893	0.000782445	0.015144	CA-CN
Il4ra	10086.9	0.316404	0.0942546	3.3569	0.000788212	0.0152165	CA-CN
Plek	20362.5	-0.33081	0.098628	-3.35412	0.000796164	0.0153307	CA-CN
Dock10	20487.7	-0.297061	0.0886187	-3.35212	0.000801948	0.0154027	CA-CN
Cndp2	9862.94	0.265458	0.0792294	3.3505	0.000806654	0.0154145	CA-CN
Hmgb2	721.88	0.441723	0.131823	3.35088	0.00080555	0.0154145	CA-CN
Slfn5	57496.5	-0.365354	0.109371	-3.3405	0.000836288	0.0159403	CA-CN
Ifitm1	492.022	0.555525	0.166601	3.33447	0.000854614	0.0162485	CA-CN
Def8	2706.74	0.313286	0.0940004	3.33282	0.000859719	0.0163044	CA-CN
Auh	1360.72	0.385539	0.115758	3.33058	0.000866656	0.0163946	CA-CN
Maf	3750.28	-0.527615	0.158461	-3.32963	0.000869616	0.0164094	CA-CN
Gpr146	3388.62	0.481514	0.144658	3.32863	0.000872738	0.0164271	CA-CN
Mier3	1850.3	-0.378212	0.11372	-3.32583	0.00088156	0.0165518	CA-CN
Usp12	12155.7	-0.299508	0.0901208	-3.32341	0.000889253	0.0166547	CA-CN
Abhd11	1682.43	0.325549	0.0979952	3.32209	0.000893462	0.016692	CA-CN
Taldo1	28448.6	0.264631	0.0797016	3.32027	0.000899314	0.0167597	CA-CN
Trim30a	18968.6	-0.308171	0.0928957	-3.31739	0.00090863	0.0168915	CA-CN
Tomm70a	3811.36	-0.261737	0.0789238	-3.31633	0.000912083	0.016914	CA-CN
Usp6nl	1388.32	-0.368203	0.1112	-3.31117	0.000929072	0.0171867	CA-CN
Trim65	1410.14	-0.360873	0.109205	-3.30455	0.000951292	0.0175546	CA-CN
Marcks	18600.2	-0.265245	0.0805418	-3.29326	0.000990336	0.0182304	CA-CN
Prr14l	4040.62	-0.268546	0.0815758	-3.29198	0.000994859	0.018269	CA-CN
Naaa	22258.8	0.267373	0.0812655	3.29011	0.00100147	0.0183458	CA-CN
Cd69	481.294	-0.751757	0.228584	-3.28875	0.00100633	0.0183899	CA-CN
C5ar1	1566.36	0.602247	0.183291	3.28573	0.00101717	0.0184982	CA-CN
H2-Q6	265.653	-2.29489	0.698399	-3.28592	0.00101648	0.0184982	CA-CN
Rpn1	8549.27	0.258063	0.0786295	3.28202	0.00103067	0.0186986	CA-CN
H2-T9	4241.13	-0.417108	0.127156	-3.2803	0.00103699	0.0187679	CA-CN
Mvb12b	1018.76	0.478093	0.14584	3.27821	0.00104469	0.018862	CA-CN
Hmgcl	3677.27	0.282138	0.0861279	3.2758	0.00105362	0.0189777	CA-CN
Cd24a	567.423	0.692518	0.211471	3.27476	0.00105753	0.0190027	CA-CN
Naglu	1461.03	0.347928	0.106473	3.26775	0.00108405	0.0194328	CA-CN
Poll	717.779	0.408527	0.125141	3.26453	0.00109648	0.019609	CA-CN
Gpcpd1	6609.13	0.288068	0.0883699	3.25979	0.00111494	0.0198919	CA-CN
Alpk1	4631.08	-0.370519	0.113736	-3.25773	0.00112309	0.0198958	CA-CN
Selenom	285.658	0.578135	0.177448	3.25806	0.00112177	0.0198958	CA-CN
Tspo	11250.5	0.256396	0.078692	3.25823	0.00112111	0.0198958	CA-CN
H2-Q8	270.459	-2.29453	0.705157	-3.25392	0.00113823	0.0201168	CA-CN
Kmt2c	8816.96	-0.362097	0.111336	-3.25229	0.00114479	0.0201854	CA-CN
Cnot1	10582.8	-0.303995	0.0935169	-3.25069	0.00115125	0.0202517	CA-CN
Ankrd17	6706.91	-0.265803	0.0818534	-3.2473	0.00116505	0.0203992	CA-CN
5830432E09Rik	797.054	-0.384215	0.118299	-3.24784	0.00116286	0.0203992	CA-CN
Alg1	1830.38	0.289551	0.0892607	3.24388	0.00117912	0.0205976	CA-CN
Tspan17	1401.46	-0.359473	0.111046	-3.23716	0.00120727	0.0210407	CA-CN
Eipr1	1134.98	0.375773	0.116117	3.23616	0.00121149	0.0210654	CA-CN
Tnfrsf11a	1389.34	-0.338611	0.104697	-3.23419	0.00121988	0.0211624	CA-CN
Senp2	4208.2	-0.255938	0.0792368	-3.23004	0.00123775	0.021423	CA-CN
Tceal9	327.409	0.484967	0.15019	3.22903	0.00124211	0.0214493	CA-CN
Eps8	4622.13	0.371964	0.115449	3.22188	0.00127351	0.0218423	CA-CN
Lta4h	3304.05	0.299213	0.0928693	3.22187	0.00127358	0.0218423	CA-CN
Socs7	2505.06	-0.375696	0.116607	-3.22189	0.00127347	0.0218423	CA-CN
Il27	400.957	-0.618032	0.192188	-3.21577	0.00130095	0.0222611	CA-CN
Hip1	11460.3	-0.408559	0.127249	-3.21072	0.00132404	0.0226048	CA-CN
Med13	6973.84	-0.331065	0.103158	-3.20931	0.00133054	0.0226643	CA-CN
Ilf3	972.705	-0.429548	0.134074	-3.20381	0.00135624	0.0230499	CA-CN
Tmem248	4493.65	-0.259988	0.0814156	-3.19334	0.00140637	0.0237801	CA-CN
Ankle2	15335.2	-0.247478	0.0775098	-3.19287	0.00140868	0.0237801	CA-CN
Tet3	13059.6	-0.329268	0.103099	-3.19372	0.00140453	0.0237801	CA-CN
Ampd3	8347.34	0.231854	0.0726604	3.19093	0.00141818	0.0238336	CA-CN
Dennd2d	1073.62	0.433323	0.135791	3.1911	0.00141731	0.0238336	CA-CN
Pirb	33190.1	0.29666	0.0930496	3.18819	0.00143166	0.0240067	CA-CN
Cyld	5716.14	-0.245551	0.0771176	-3.1841	0.00145203	0.024294	CA-CN
Arhgap26	20566.3	0.325515	0.102366	3.17991	0.0014732	0.0245936	CA-CN
Nfxl1	2092.51	-0.311765	0.0980721	-3.17894	0.00147816	0.0246218	CA-CN
Cd3eap	951.898	0.354332	0.111604	3.1749	0.0014989	0.0248069	CA-CN
Sp1	11558.1	-0.281422	0.0886208	-3.17557	0.00149542	0.0248069	CA-CN
Rabggta	2415.62	0.288621	0.0909087	3.17485	0.00149916	0.0248069	CA-CN
Spryd3	2036.09	0.360841	0.113699	3.17365	0.00150536	0.0248549	CA-CN
Tnpo1	4631.73	-0.356911	0.112549	-3.17115	0.00151836	0.0249058	CA-CN
Ptgir	6271.03	-0.309908	0.0977079	-3.17178	0.00151509	0.0249058	CA-CN
Acsf3	595.717	0.396639	0.12506	3.17159	0.00151606	0.0249058	CA-CN
Pbxip1	13264.2	0.257792	0.0813829	3.16764	0.0015368	0.0251311	CA-CN
Gmppa	2303.36	0.296099	0.0935077	3.16657	0.00154249	0.0251311	CA-CN
Hpse	15245.2	-0.237286	0.074948	-3.16601	0.00154545	0.0251311	CA-CN
Zfp652	1679.18	-0.39707	0.125371	-3.16715	0.00153941	0.0251311	CA-CN
Ankib1	2793.67	-0.306479	0.0969784	-3.16028	0.00157615	0.0255751	CA-CN
Nfs1	1567.9	0.293928	0.0930425	3.15907	0.00158273	0.0256267	CA-CN
Abhd10	457.172	0.445472	0.141195	3.15502	0.00160484	0.0259025	CA-CN
Psmb6	3148.11	0.283385	0.0898297	3.1547	0.00160665	0.0259025	CA-CN
Sass6	966.262	-0.409284	0.1299	-3.15075	0.00162852	0.026199	CA-CN
Mpnd	2283.43	0.291025	0.0923858	3.15011	0.0016321	0.0262006	CA-CN
Mb21d1	1563.56	-0.35531	0.113081	-3.14209	0.00167749	0.026872	CA-CN
Aig1	336.648	0.552828	0.176266	3.13633	0.00171074	0.0273464	CA-CN
Cbl	11549.3	-0.455654	0.145372	-3.13441	0.00172201	0.0274682	CA-CN
9330133O14Rik	1110.21	0.432749	0.138362	3.12766	0.00176204	0.0279883	CA-CN
Anxa2	44846.4	0.268406	0.0858126	3.12781	0.00176115	0.0279883	CA-CN
Abhd8	491.738	0.448038	0.143383	3.12476	0.00177948	0.0282057	CA-CN
1110008P14Rik	792.524	0.352468	0.112835	3.12374	0.00178568	0.0282446	CA-CN
Mef2c	4942.3	-0.374265	0.119932	-3.12066	0.00180447	0.0284819	CA-CN
Fam208b	2234.54	-0.316434	0.101431	-3.1197	0.00181036	0.028515	CA-CN
Pltp	2297.08	-0.5325	0.170792	-3.11783	0.00182188	0.0286366	CA-CN
Stard3	5889.24	-0.28937	0.0929712	-3.11248	0.00185525	0.0291004	CA-CN
P2ry12	673.148	0.464291	0.149438	3.10691	0.00189053	0.0295921	CA-CN
Prkx	10495.7	-0.255303	0.0822126	-3.10539	0.00190025	0.0296211	CA-CN
Txn1	4876.49	0.319389	0.10284	3.10568	0.00189843	0.0296211	CA-CN
Pygl	18832.9	0.26967	0.0869397	3.1018	0.00192347	0.0297368	CA-CN
Ctsd	16718.3	0.325402	0.104856	3.10332	0.00191361	0.0297368	CA-CN
Swap70	3354.33	-0.25835	0.0832807	-3.10216	0.00192114	0.0297368	CA-CN
Smcr8	4705.96	-0.294588	0.0949437	-3.10277	0.0019172	0.0297368	CA-CN
Caprin1	11742.3	-0.227115	0.0733008	-3.09841	0.00194565	0.0300181	CA-CN
Hinfp	662.377	-0.438748	0.141652	-3.09736	0.00195256	0.030063	CA-CN
Kmt2d	21623.9	-0.353794	0.114273	-3.09604	0.00196122	0.0301348	CA-CN
Zswim6	5288.3	-0.297981	0.0964434	-3.08969	0.00200363	0.0305843	CA-CN
Mfsd7a	6482.91	0.253031	0.0819005	3.0895	0.00200495	0.0305843	CA-CN
Tpt1	6968.34	-0.321318	0.104012	-3.08923	0.00200673	0.0305843	CA-CN
Rnf114	10033.9	-0.29086	0.0941403	-3.08964	0.00200396	0.0305843	CA-CN
Socs4	1016.91	-0.432621	0.140084	-3.0883	0.00201307	0.0306191	CA-CN
Slc15a4	8103.57	-0.325259	0.105393	-3.08615	0.00202769	0.0306991	CA-CN
Rab27a	5158.1	0.3342	0.108305	3.08572	0.00203057	0.0306991	CA-CN
Nsd1	13883.8	-0.240611	0.0779481	-3.08681	0.00202319	0.0306991	CA-CN
Lrrc8c	3596.92	-0.367491	0.119155	-3.08416	0.00204129	0.0307994	CA-CN
Cep170	7146.57	-0.299277	0.0970823	-3.08271	0.00205125	0.0308878	CA-CN
Bdp1	3117.24	-0.35758	0.116047	-3.08134	0.00206072	0.0309684	CA-CN
Slc29a3	6936.97	-0.370715	0.12052	-3.07597	0.00209822	0.0314691	CA-CN
Nsd3	9895.17	-0.278081	0.0905751	-3.07017	0.00213934	0.032022	CA-CN
Glrx5	1069.12	0.318262	0.103702	3.06899	0.00214781	0.032085	CA-CN
Ifi47	11311.3	-0.840518	0.273962	-3.06801	0.00215488	0.0321183	CA-CN
Gfpt1	4624.59	-0.32211	0.105007	-3.0675	0.00215857	0.0321183	CA-CN
Oas2	11536.7	-0.453569	0.147955	-3.0656	0.00217235	0.0322596	CA-CN
Mtus1	14898.3	0.275483	0.0899139	3.06385	0.00218506	0.0323845	CA-CN
Cdk4	2632.61	0.272685	0.0892005	3.05699	0.00223572	0.0330455	CA-CN
Trim56	1878.32	-0.490039	0.16032	-3.05663	0.00223844	0.0330455	CA-CN
Hipk3	9124.96	-0.302979	0.0991672	-3.05523	0.00224886	0.0331344	CA-CN
Ifi205	2077.12	-1.27626	0.417812	-3.05463	0.00225335	0.0331356	CA-CN
Phka2	4218.76	-0.304183	0.0996194	-3.05345	0.00226223	0.0332014	CA-CN
Phf11a	683.051	-0.688475	0.225744	-3.0498	0.00228995	0.033436	CA-CN
Pak1ip1	2737.02	0.283863	0.0930822	3.04959	0.00229153	0.033436	CA-CN
Clec4e	2328.45	0.518723	0.170036	3.05067	0.00228334	0.033436	CA-CN
H2-D1	112442	-0.321065	0.105305	-3.04891	0.00229677	0.0334475	CA-CN
Dtx3	1299.36	0.395787	0.129893	3.04702	0.0023112	0.0335927	CA-CN
Camk1d	16005.4	-0.23982	0.0789604	-3.03722	0.00238774	0.0345718	CA-CN
Cyp4f18	11552.3	0.349709	0.115135	3.03738	0.00238644	0.0345718	CA-CN
Pym1	889.461	0.348434	0.114751	3.03645	0.00239385	0.0345936	CA-CN
Jund	8898.48	-0.431323	0.1421	-3.03534	0.00240265	0.0346543	CA-CN
Txndc12	1685.37	0.337016	0.111181	3.03125	0.00243546	0.0349935	CA-CN
Plekhf2	8879.93	-0.28431	0.0937844	-3.03153	0.00243319	0.0349935	CA-CN
Cnpy4	896.496	0.362445	0.119613	3.03016	0.00244427	0.0350531	CA-CN
Nrp1	15491.5	-0.336227	0.110995	-3.0292	0.002452	0.0350971	CA-CN
Myo5a	10692.2	-0.316666	0.104593	-3.0276	0.00246505	0.0351827	CA-CN
4931406P16Rik	2111.11	-0.33467	0.110612	-3.02561	0.00248134	0.0351827	CA-CN
Med14	3295.77	-0.27534	0.0909851	-3.0262	0.00247645	0.0351827	CA-CN
Tsc22d1	1442.68	-0.458652	0.15152	-3.02702	0.0024698	0.0351827	CA-CN
Mtif2	1237.18	0.312901	0.103407	3.02592	0.00247882	0.0351827	CA-CN
Fam96a	5732.38	0.358215	0.118507	3.02274	0.00250494	0.0353841	CA-CN
Frmd4b	2265.34	-0.499049	0.16508	-3.02307	0.00250223	0.0353841	CA-CN
Calhm2	6935.34	-0.238979	0.0790866	-3.02173	0.00251333	0.035436	CA-CN
Pdia6	7353.4	0.26771	0.0886208	3.02085	0.00252066	0.035473	CA-CN
Taok1	9894.32	-0.335183	0.111014	-3.01929	0.00253368	0.0355897	CA-CN
Gtf2h5	952.895	0.390504	0.129388	3.01808	0.00254383	0.0356657	CA-CN
Ndufb7	2160.35	0.275413	0.0913756	3.01408	0.00257761	0.0360721	CA-CN
Arsb	2459.22	-0.319568	0.106169	-3.01	0.0026125	0.036425	CA-CN
Btbd7	1910.04	-0.390921	0.129856	-3.01041	0.00260892	0.036425	CA-CN
Kpnb1	7966.35	-0.233812	0.0777431	-3.0075	0.0026341	0.036545	CA-CN
2500002B13Rik	173.121	0.7719	0.256674	3.00731	0.00263567	0.036545	CA-CN
Marcksl1	1453.18	-0.480157	0.159615	-3.00823	0.00262778	0.036545	CA-CN
Chid1	1816.47	0.288893	0.096119	3.00557	0.00265079	0.0366872	CA-CN
Foxred2	3160.22	-0.286723	0.0954736	-3.00317	0.00267186	0.0368877	CA-CN
Ticam1	2124.53	-0.317012	0.105572	-3.0028	0.00267508	0.0368877	CA-CN
Gnptab	6896.1	-0.245765	0.0819124	-3.00034	0.00269682	0.0371195	CA-CN
Plec	41512.7	-0.392425	0.130829	-2.99952	0.00270402	0.0371507	CA-CN
Ubxn8	2214.89	0.299896	0.100028	2.99812	0.00271652	0.0372544	CA-CN
Casp6	1377.01	0.409281	0.136556	2.99716	0.00272505	0.0372764	CA-CN
Acot13	445.614	0.415485	0.138642	2.99683	0.00272802	0.0372764	CA-CN
Prdx2	5206.39	0.259556	0.0866922	2.994	0.00275347	0.037556	CA-CN
Rfx2	6427.19	-0.391588	0.130995	-2.98934	0.00279577	0.0380533	CA-CN
Iqsec2	1885.75	-0.324559	0.108589	-2.98888	0.00280005	0.0380533	CA-CN
BC147527	3551.44	-0.334646	0.112027	-2.98719	0.00281556	0.0381952	CA-CN
Tesk1	2214.88	-0.314817	0.105445	-2.98561	0.00283009	0.0383233	CA-CN
Daam1	2131.21	-0.31504	0.105575	-2.98403	0.00284478	0.0384374	CA-CN
Itpr1	13293.5	-0.311455	0.104389	-2.98361	0.00284873	0.0384374	CA-CN
Plekhg1	3684.81	-0.262325	0.0880677	-2.97867	0.002895	0.0389919	CA-CN
Tlk2	2752.14	-0.280153	0.0941429	-2.97583	0.002922	0.0392852	CA-CN
Galns	4295.3	0.259541	0.0872592	2.97437	0.00293595	0.0394025	CA-CN
Fam160a2	3191.65	0.342156	0.115133	2.97183	0.00296027	0.0396582	CA-CN
Itgav	7501.3	-0.368441	0.124068	-2.96967	0.00298116	0.039867	CA-CN
Isoc1	5589.48	-0.242763	0.081842	-2.96624	0.00301464	0.0401721	CA-CN
Grk3	14480.6	-0.326325	0.109994	-2.96674	0.00300975	0.0401721	CA-CN
Map3k6	1020.31	0.53585	0.180868	2.96266	0.00304993	0.040499	CA-CN
Wasf2	16605.1	-0.279309	0.094265	-2.96302	0.00304636	0.040499	CA-CN
Mfsd14a	5154.2	-0.238837	0.0806507	-2.96138	0.00306265	0.0405964	CA-CN
Ncf4	11774.7	0.306776	0.10363	2.96031	0.00307332	0.0406661	CA-CN
Parp10	4017.51	-0.313274	0.105898	-2.95826	0.00309384	0.0408658	CA-CN
Ncoa1	8790.01	-0.234889	0.07944	-2.95681	0.00310836	0.0409857	CA-CN
Specc1l	4416.86	-0.318291	0.107676	-2.956	0.00311656	0.0410219	CA-CN
Rnf19b	9148.79	-0.394339	0.133434	-2.9553	0.00312362	0.0410432	CA-CN
Vps13d	6813.74	-0.283527	0.0959564	-2.95475	0.00312921	0.0410451	CA-CN
Urod	1726.76	0.303099	0.102668	2.95222	0.00315496	0.0413108	CA-CN
Nfkbie	3558.46	-0.404702	0.13757	-2.94178	0.00326332	0.0426554	CA-CN
F13a1	124048	0.290536	0.0988223	2.93998	0.00328232	0.0428294	CA-CN
Rbm45	1155.36	0.28901	0.0984176	2.93657	0.00331869	0.0432291	CA-CN
Rapgef2	2897.69	-0.323199	0.110229	-2.93206	0.00336725	0.043556	CA-CN
Mtg1	474.953	0.427256	0.145757	2.93128	0.00337564	0.043556	CA-CN
Bbc3	1405.86	-0.490276	0.167168	-2.93284	0.00335881	0.043556	CA-CN
Gse1	4507.98	-0.361082	0.123237	-2.92998	0.00338985	0.043556	CA-CN
Ccdc125	2935.78	0.337939	0.115333	2.93013	0.00338825	0.043556	CA-CN
Ap5s1	912.431	0.413205	0.141001	2.93051	0.0033841	0.043556	CA-CN
Sgms1	3862.66	-0.307011	0.104726	-2.93157	0.00337255	0.043556	CA-CN
Sesn1	1840.51	-0.288879	0.098595	-2.92996	0.00339007	0.043556	CA-CN
Dynlrb1	2709.85	0.269382	0.0920638	2.92604	0.00343311	0.0440339	CA-CN
Tbl3	1264.32	0.381957	0.130735	2.92162	0.00348221	0.0445877	CA-CN
Prr5l	4523.19	-0.30378	0.104027	-2.9202	0.00349812	0.0447154	CA-CN
Fam8a1	361.553	-0.550089	0.18861	-2.91654	0.0035394	0.0451216	CA-CN
Got2	2076.13	0.271015	0.0929306	2.91632	0.00354189	0.0451216	CA-CN
Apc	5427.15	-0.324214	0.111196	-2.9157	0.00354895	0.0451352	CA-CN
Pkig	1636.76	-0.297311	0.102293	-2.90646	0.00365547	0.0464116	CA-CN
Rock2	4609	-0.340703	0.117305	-2.90442	0.00367932	0.0466334	CA-CN
Adnp	6155.33	-0.237849	0.0819064	-2.90391	0.00368533	0.0466334	CA-CN
Itsn2	6244.95	-0.302357	0.104156	-2.90293	0.00369685	0.0466388	CA-CN
Elf1	7228.59	-0.240168	0.082736	-2.90282	0.00369815	0.0466388	CA-CN
Ankrd46	1005.12	0.311691	0.107427	2.90141	0.00371483	0.0467708	CA-CN
Ndufb2	1040.65	0.31042	0.107063	2.89943	0.00373844	0.0469896	CA-CN
Rc3h2	4334.4	-0.303024	0.104538	-2.89869	0.00374724	0.0470217	CA-CN
Tcerg1	1950.71	-0.306555	0.105978	-2.89263	0.00382028	0.0478584	CA-CN
Ift20	1028.43	0.33844	0.117108	2.88999	0.0038525	0.0481819	CA-CN
Zfp467	1754.39	-0.371845	0.128711	-2.88899	0.00386487	0.0482564	CA-CN
Card9	8284.35	0.289189	0.100191	2.88638	0.00389699	0.0485769	CA-CN
Ebi3	2318.47	-0.304762	0.105628	-2.88524	0.0039111	0.0486722	CA-CN
Ankfy1	12962.2	-0.250162	0.0867427	-2.88395	0.00392718	0.0487916	CA-CN
Zcchc6	9818.68	-0.247686	0.0859795	-2.88076	0.00396715	0.0492071	CA-CN
Rhou	1948.12	0.373855	0.129868	2.87874	0.00399262	0.0494416	CA-CN
Dennd1a	5329.97	-0.238237	0.0827955	-2.87741	0.00400956	0.0495697	CA-CN
Rpain	629.965	0.417334	0.14512	2.87578	0.00403031	0.0497446	CA-CN
Rpn2	12211.1	0.243897	0.0848393	2.87481	0.00404274	0.0498163	CA-CN

## Sheet: Ly6chigh_FC>2
GENE	baseMean	log2FoldChange	lfcSE	stat	pvalue	padj	contrast
Lpl	7042.02	-1.70108	0.139407	-12.2023	3.02144e-34	2.27484e-30	CA-CN
Lcn2	303.176	2.53132	0.210411	12.0304	2.46085e-33	9.26388e-30	CA-CN
Mrc1	1805.83	-1.60126	0.14945	-10.7144	8.7135e-27	2.1868e-23	CA-CN
Ifit2	5138.08	-1.47345	0.142395	-10.3477	4.28879e-25	8.07257e-22	CA-CN
Ifit1bl1	1647.43	-1.47948	0.144588	-10.2324	1.41976e-24	2.13787e-21	CA-CN
Klrk1	653.4	-1.6318	0.177825	-9.17641	4.45723e-20	4.71204e-17	CA-CN
Pbx1	5038.07	1.06636	0.116366	9.16387	5.00681e-20	4.71204e-17	CA-CN
Aplnr	749.27	-1.6013	0.182637	-8.76767	1.82401e-18	1.52589e-15	CA-CN
Gcnt2	5376.36	1.35574	0.155395	8.72442	2.67545e-18	2.01434e-15	CA-CN
Vcan	15441.2	1.20856	0.138752	8.71023	3.03248e-18	2.0756e-15	CA-CN
Rsad2	5715	-1.24745	0.146195	-8.53279	1.42854e-17	8.27343e-15	CA-CN
Ifit3	3427.34	-1.45892	0.174468	-8.3621	6.16123e-17	3.31342e-14	CA-CN
C1rl	1328.39	1.09907	0.132098	8.32006	8.79173e-17	4.41286e-14	CA-CN
Ifit3b	685.954	-1.68954	0.210638	-8.02105	1.04845e-15	4.93362e-13	CA-CN
Serpina3g	334.005	-1.84237	0.247741	-7.43667	1.03252e-13	3.88692e-11	CA-CN
Prtn3	906.429	1.28992	0.17414	7.40737	1.28832e-13	4.52724e-11	CA-CN
Ifi208	647.015	-1.44467	0.195124	-7.40385	1.32287e-13	4.52724e-11	CA-CN
Nab2	757.248	-1.09178	0.156983	-6.95475	3.5319e-12	8.8639e-10	CA-CN
Lbp	569.203	1.14967	0.170204	6.75468	1.43149e-11	3.1699e-09	CA-CN
Slamf7	1807.18	-1.09006	0.162118	-6.72385	1.76981e-11	3.80712e-09	CA-CN
S100a8	116.082	2.25933	0.338182	6.68082	2.37617e-11	4.96949e-09	CA-CN
Ccr1	2646.77	1.13857	0.17307	6.57869	4.74613e-11	9.65774e-09	CA-CN
Tcf19	411.174	1.13549	0.176291	6.44099	1.18699e-10	2.2915e-08	CA-CN
Ifit1	2712.51	-1.00201	0.166013	-6.03576	1.58214e-09	2.83044e-07	CA-CN
Nlrp1c-ps	736.349	-1.05739	0.175288	-6.03229	1.61653e-09	2.83044e-07	CA-CN
Tlr11	561.882	-1.33872	0.223307	-5.99496	2.03537e-09	3.4054e-07	CA-CN
Cd36	623.971	-1.25742	0.212448	-5.91871	3.24479e-09	5.01955e-07	CA-CN
Ier3	234.209	1.39318	0.235387	5.91868	3.24544e-09	5.01955e-07	CA-CN
Tarm1	742.746	1.28163	0.220927	5.80116	6.58597e-09	9.3558e-07	CA-CN
Lrg1	233.753	3.14816	0.567877	5.54373	2.96095e-08	3.53858e-06	CA-CN
Il12rb2	581.905	-1.02444	0.187871	-5.45288	4.95605e-08	5.65365e-06	CA-CN
Phf11d	1056.26	-1.12552	0.211406	-5.32399	1.01515e-07	1.03284e-05	CA-CN
Socs1	311.63	-1.22518	0.250289	-4.89505	9.82793e-07	7.18305e-05	CA-CN
Spink2	118.2	1.33819	0.289428	4.62356	3.77203e-06	0.000208821	CA-CN
F11r	972.402	2.31329	0.511568	4.52196	6.12709e-06	0.000307539	CA-CN
Cxcl10	1240.45	-1.62603	0.372816	-4.36149	1.29178e-05	0.000582386	CA-CN
Cd2	222.824	1.0542	0.249061	4.23271	2.30888e-05	0.000929603	CA-CN
Tgtp2	793.639	-1.97176	0.49623	-3.97348	7.08304e-05	0.00231862	CA-CN
Mt1	135.047	1.0664	0.289296	3.68619	0.000227633	0.0058895	CA-CN
H2-Q6	265.653	-2.29489	0.698399	-3.28592	0.00101648	0.0184982	CA-CN
H2-Q8	270.459	-2.29453	0.705157	-3.25392	0.00113823	0.0201168	CA-CN
Ifi205	2077.12	-1.27626	0.417812	-3.05463	0.00225335	0.0331356	CA-CN
H2-Q9	806.581	-1.55488	0.546556	-2.84488	0.00444287	0.052595	CA-CN
H2-Q7	804.499	-1.54657	0.545895	-2.83309	0.00461004	0.0538124	CA-CN
Flt1	2614.28	-1.25301	0.446015	-2.80936	0.00496405	0.0564567	CA-CN
Gbp2	5894.13	-1.15697	0.428096	-2.7026	0.00687998	0.0698105	CA-CN
Siglec1	6812.39	-1.26125	0.51616	-2.44353	0.0145444	0.111313	CA-CN
H2-Q5	383.131	-1.16763	0.507578	-2.30039	0.0214263	0.141986	CA-CN
Fosb	487.897	-1.38353	0.761806	-1.81612	0.0693521	0.282244	CA-CN
H2-Aa	12735.4	-1.01418	0.656585	-1.54463	0.122435	0.389368	CA-CN
H2-Eb1	5063.36	-1.06489	0.784172	-1.35798	0.174469	0.458679	CA-CN
Ppbp	135.839	-1.24902	0.959087	-1.3023	0.192815	0.482031	CA-CN
Egr1	1439.35	1.14707	1.16571	0.984013	0.325109	0.620332	CA-CN

## Sheet: Ly6clow_DEGs
GENE	baseMean	log2FoldChange	lfcSE	stat	pvalue	padj	contrast
Arhgap31	221.963	-1.00585	0.150875	-6.66677	2.615e-11	2.56845e-07	CA-CN
Hp	1079.54	1.00407	0.15866	6.32842	2.47687e-10	1.21639e-06	CA-CN
Rmrp	27.1408	1.03665	0.194163	5.33904	9.34376e-08	0.000305915	CA-CN
Pltp	1428.65	0.746012	0.142448	5.23709	1.63126e-07	0.000327792	CA-CN
Pbx1	386.854	0.837063	0.159961	5.23291	1.66866e-07	0.000327792	CA-CN
F11r	43.6584	0.870835	0.182805	4.76374	1.90034e-06	0.00311086	CA-CN
Naip5	1307.13	-0.473375	0.107639	-4.3978	1.09351e-05	0.0153435	CA-CN
Phka1	50.5393	-0.696687	0.173076	-4.02532	5.6899e-05	0.0698578	CA-CN
Apoe	11172.6	0.600586	0.158036	3.80031	0.000144515	0.141943	CA-CN
Fam208b	196.961	-0.65933	0.17329	-3.80478	0.000141931	0.141943	CA-CN
Sdhaf1	63.8265	0.645842	0.17405	3.71066	0.000206719	0.184581	CA-CN
Mef2d	1520.09	-0.350586	0.0992105	-3.53376	0.000409692	0.236706	CA-CN
Tgtp2	50.4047	-0.67673	0.189167	-3.57742	0.000347003	0.236706	CA-CN
Nlrp1b	67.1466	-0.646418	0.180952	-3.57233	0.000353821	0.236706	CA-CN
Ccnd2	263.034	-0.667879	0.188801	-3.53748	0.000403961	0.236706	CA-CN
Fgd4	828.97	-0.589081	0.165821	-3.55251	0.000381576	0.236706	CA-CN
Fanca	154.082	-0.521489	0.146205	-3.56683	0.000361325	0.236706	CA-CN
Ash1l	406.435	-0.596217	0.169801	-3.51126	0.000445981	0.243357	CA-CN
Naip6	817.44	-0.636589	0.18383	-3.46292	0.000534341	0.276226	CA-CN
Itgb5	836.737	0.40724	0.121751	3.34487	0.000823207	0.30828	CA-CN
Gsr	3535.96	0.336817	0.100561	3.34938	0.000809936	0.30828	CA-CN
Cirbp	329.107	0.486152	0.142547	3.41046	0.000648535	0.30828	CA-CN
Notch1	167.02	-0.561049	0.166144	-3.37688	0.000733118	0.30828	CA-CN
Adgrl3	32.5104	0.640856	0.190365	3.36645	0.000761424	0.30828	CA-CN
Cep295	103.424	-0.573509	0.170977	-3.3543	0.000795666	0.30828	CA-CN
Zfp710	1636.83	-0.348752	0.104516	-3.33682	0.000847441	0.30828	CA-CN
Matk	107.752	0.571143	0.16809	3.39783	0.000679219	0.30828	CA-CN
Gm1966	1375.72	-0.608536	0.183221	-3.32133	0.000895898	0.314268	CA-CN
C5ar2	78.1326	0.511258	0.155704	3.28353	0.00102514	0.335631	CA-CN
Mtss1	286.266	-0.561714	0.170997	-3.28493	0.00102007	0.335631	CA-CN
Brwd3	48.4106	-0.62479	0.194183	-3.21754	0.00129295	0.348863	CA-CN
Havcr2	859.17	-0.481535	0.150029	-3.20962	0.00132909	0.348863	CA-CN
Gbp3	85.292	-0.624105	0.192676	-3.23914	0.00119892	0.348863	CA-CN
Cd79b	93.8161	0.511273	0.159887	3.19771	0.00138522	0.348863	CA-CN
Trim13	21.5333	-0.623034	0.194164	-3.20881	0.00133288	0.348863	CA-CN
Ier2	973.065	0.403118	0.12403	3.25017	0.00115335	0.348863	CA-CN
0610040J01Rik	37.2489	0.59897	0.185296	3.23251	0.00122709	0.348863	CA-CN
Hspa1a	14.4734	-0.557079	0.171375	-3.25065	0.00115142	0.348863	CA-CN
9930111J21Rik1	94.0117	-0.622318	0.194184	-3.20479	0.00135163	0.348863	CA-CN
Ccl9	1006.82	0.392046	0.124114	3.15876	0.00158441	0.354638	CA-CN
Oaz1-ps	118.804	0.472381	0.149584	3.15798	0.00158869	0.354638	CA-CN
Parp4	472.618	-0.450301	0.141617	-3.17972	0.00147418	0.354638	CA-CN
Bdp1	273.547	-0.538328	0.169717	-3.17191	0.00151438	0.354638	CA-CN
Oaz1	121.499	0.469639	0.148139	3.17026	0.00152304	0.354638	CA-CN
Slc46a3	891.069	-0.326615	0.103761	-3.14778	0.00164517	0.359085	CA-CN
Ddx54	416.723	0.380241	0.124004	3.06636	0.00216685	0.361009	CA-CN
Ckap5	203.007	-0.464403	0.153211	-3.03113	0.00243641	0.361009	CA-CN
Ptar1	25.1473	-0.593906	0.193534	-3.06875	0.00214958	0.361009	CA-CN
Macf1	2533.07	-0.564229	0.184618	-3.05619	0.00224166	0.361009	CA-CN
Hdac9	86.7741	-0.557159	0.181841	-3.06399	0.00218407	0.361009	CA-CN
Uba6	86.7469	-0.578322	0.187079	-3.09132	0.0019927	0.361009	CA-CN
Ccrl2	65.6191	-0.561503	0.184564	-3.04233	0.00234757	0.361009	CA-CN
Zdhhc21	195.716	-0.573515	0.184035	-3.11634	0.00183114	0.361009	CA-CN
Il12rb2	71.3861	-0.602146	0.193986	-3.10407	0.00190881	0.361009	CA-CN
Cyp51	189.271	-0.501606	0.16035	-3.1282	0.00175881	0.361009	CA-CN
Kif23	81.4236	-0.494439	0.163002	-3.03333	0.00241867	0.361009	CA-CN
Gm4956	44.9847	0.540195	0.175604	3.0762	0.00209655	0.361009	CA-CN
Foxd4	15.3824	0.589919	0.188656	3.12696	0.00176622	0.361009	CA-CN
Prkab2	333.406	-0.464352	0.152342	-3.04808	0.0023031	0.361009	CA-CN
Rps18	50.9243	0.561016	0.185282	3.0279	0.0024626	0.361009	CA-CN
Prr33	257.204	-0.399403	0.131851	-3.0292	0.00245204	0.361009	CA-CN
Nlrc5	634.578	-0.530264	0.174158	-3.04474	0.00232885	0.361009	CA-CN
Tor2a	103.776	0.493321	0.161055	3.06306	0.00219087	0.361009	CA-CN
Ssu72	262.767	0.468951	0.149812	3.13026	0.00174651	0.361009	CA-CN
Ankhd1	590.352	-0.449721	0.144786	-3.1061	0.0018957	0.361009	CA-CN
Vps13a	87.3234	-0.572148	0.186768	-3.06342	0.0021882	0.361009	CA-CN
Dhcr24	45.1169	-0.556179	0.180924	-3.0741	0.00211136	0.361009	CA-CN
Selenom	36.8692	0.584084	0.193252	3.02239	0.0025079	0.362244	CA-CN
Kctd2	150.544	0.438463	0.145812	3.00705	0.00263798	0.364933	CA-CN
Zfp160	105.749	-0.508013	0.16881	-3.00938	0.00261779	0.364933	CA-CN
Cdkn2c	29.4882	0.570361	0.189152	3.01536	0.00256673	0.364933	CA-CN
Irgm2	492.168	-0.556149	0.185832	-2.99276	0.0027647	0.369845	CA-CN
Samd9l	431.671	-0.4864	0.162656	-2.99036	0.00278645	0.369845	CA-CN
Ergic3	270.536	0.42131	0.140568	2.9972	0.00272474	0.369845	CA-CN
Nlrp1c-ps	18.2321	-0.540025	0.181935	-2.96823	0.00299518	0.392249	CA-CN
Slc7a8	53.7128	-0.534362	0.180796	-2.95561	0.00312053	0.392825	CA-CN
Ppp2cb	502.605	0.368792	0.125014	2.95	0.00317769	0.392825	CA-CN
Gm4070	62.14	-0.549369	0.187128	-2.93579	0.00332695	0.392825	CA-CN
Sqle	93.6284	-0.503107	0.169832	-2.96238	0.00305271	0.392825	CA-CN
Nktr	503.65	-0.407475	0.137958	-2.95361	0.0031408	0.392825	CA-CN
Ttc14	422.35	-0.519608	0.176617	-2.942	0.00326103	0.392825	CA-CN
Gvin1	62.14	-0.549369	0.187128	-2.93579	0.00332695	0.392825	CA-CN
Slamf7	22.7037	-0.569182	0.194077	-2.93277	0.00335953	0.392825	CA-CN
Nfat5	912.786	-0.539754	0.183442	-2.94237	0.00325706	0.392825	CA-CN
Nufip2	1229.95	-0.48187	0.164899	-2.9222	0.00347564	0.40162	CA-CN
Lilrb4a	453.039	-0.397596	0.136704	-2.90844	0.00363234	0.402438	CA-CN
Nudt22	54.5441	0.499488	0.17181	2.90722	0.00364661	0.402438	CA-CN
Smg1	1075.95	-0.545449	0.187199	-2.91374	0.00357122	0.402438	CA-CN
Filip1l	1710.77	-0.368268	0.126643	-2.90793	0.00363828	0.402438	CA-CN
Mga	340.423	-0.496086	0.173699	-2.85601	0.00428999	0.419797	CA-CN
Tbc1d8b	80.8963	-0.510215	0.177005	-2.88249	0.00394546	0.419797	CA-CN
Apoc4-apoc2	1069.92	0.476516	0.166686	2.85876	0.00425306	0.419797	CA-CN
Gclc	134.749	-0.415251	0.145681	-2.85041	0.00436632	0.419797	CA-CN
Slfn9	20.128	-0.532547	0.186322	-2.85821	0.00426037	0.419797	CA-CN
Apoc2	1207.98	0.461887	0.161137	2.86643	0.00415131	0.419797	CA-CN
Eef1g	85.0353	0.504972	0.17732	2.8478	0.00440227	0.419797	CA-CN
Ifi27l2a	526.734	0.500357	0.174549	2.86657	0.00414943	0.419797	CA-CN
Enpp4	45.7998	-0.533512	0.184879	-2.88574	0.003905	0.419797	CA-CN
Lyar	54.4061	0.523721	0.18348	2.85438	0.00431205	0.419797	CA-CN
Ogt	1359.98	-0.438147	0.151963	-2.88324	0.00393609	0.419797	CA-CN
Ndc1	24.5083	-0.550689	0.191501	-2.87564	0.00403204	0.419797	CA-CN
Xylt1	158.106	-0.518574	0.182078	-2.84808	0.00439834	0.419797	CA-CN
Acod1	14.6306	-0.536398	0.186388	-2.87785	0.00400395	0.419797	CA-CN
Pot1b	1735.29	-0.380944	0.134621	-2.82974	0.00465857	0.436275	CA-CN
Tns3	196.874	-0.472943	0.167155	-2.82938	0.0046639	0.436275	CA-CN
Slc25a37	432.385	-0.372713	0.131888	-2.82598	0.00471355	0.436759	CA-CN
Lss	43.4923	-0.515148	0.182652	-2.82038	0.00479672	0.440312	CA-CN
Mdn1	117.073	-0.533894	0.189996	-2.81003	0.00495373	0.450515	CA-CN
Cd36	3274.35	-0.393663	0.142216	-2.76806	0.00563902	0.452672	CA-CN
Sc5d	87.8668	-0.444587	0.158761	-2.80036	0.00510458	0.452672	CA-CN
Ints6	79.3865	-0.491166	0.177162	-2.77241	0.00556421	0.452672	CA-CN
Ccdc86	58.3817	0.482618	0.172811	2.79275	0.00522615	0.452672	CA-CN
Bace1	52.3486	-0.533966	0.191538	-2.78779	0.00530694	0.452672	CA-CN
Rpl13a	853.183	0.437288	0.156406	2.79585	0.0051764	0.452672	CA-CN
Ceacam19	12.625	-0.530946	0.190621	-2.78535	0.00534697	0.452672	CA-CN
Rgag4	19.3679	-0.533851	0.192461	-2.77382	0.0055403	0.452672	CA-CN
Dhrs3	96.6318	0.490372	0.177533	2.76214	0.0057424	0.452672	CA-CN
Smarcad1	112.358	-0.450986	0.163522	-2.75796	0.00581638	0.452672	CA-CN
Zfp994	40.2199	-0.519614	0.18808	-2.76273	0.00573195	0.452672	CA-CN
Itsn2	500.73	-0.492854	0.176686	-2.78944	0.0052799	0.452672	CA-CN
Zfx	189.659	-0.386593	0.139422	-2.77282	0.00555726	0.452672	CA-CN
Stard4	163.196	-0.42397	0.153743	-2.75766	0.00582176	0.452672	CA-CN
Zc3h7a	706.025	-0.332431	0.119619	-2.77909	0.00545111	0.452672	CA-CN
Ahnak	3571.76	-0.505221	0.183237	-2.7572	0.00582988	0.452672	CA-CN
Cdk9	367.275	0.3488	0.125862	2.7713	0.00558335	0.452672	CA-CN
Hsh2d	14.7087	0.53776	0.194012	2.77179	0.00557494	0.452672	CA-CN
Stat2	426.244	-0.43627	0.158304	-2.7559	0.00585312	0.452672	CA-CN
Fcgrt	626.604	0.459103	0.166772	2.75288	0.00590736	0.453297	CA-CN
Kti12	85.3214	0.430123	0.156425	2.74971	0.00596478	0.454156	CA-CN
Mesdc2	143.974	0.388835	0.142186	2.7347	0.00624374	0.457654	CA-CN
Hip1	2790.51	-0.375293	0.137833	-2.72281	0.00647298	0.457654	CA-CN
Ranbp1	141.762	0.420465	0.154943	2.71369	0.00665391	0.457654	CA-CN
Fabp4	536.196	0.440009	0.161589	2.72301	0.00646909	0.457654	CA-CN
F13a1	93.5032	-0.354191	0.129535	-2.73433	0.00625075	0.457654	CA-CN
Sf3b5	189.237	0.415182	0.152986	2.71386	0.00665039	0.457654	CA-CN
R3hdm1	212.686	-0.399	0.147057	-2.71323	0.00666305	0.457654	CA-CN
2010016I18Rik	61.9579	-0.496617	0.181951	-2.7294	0.00634506	0.457654	CA-CN
Htt	338.563	-0.436215	0.15988	-2.72839	0.00636435	0.457654	CA-CN
Batf2	37.8189	-0.52945	0.194025	-2.72878	0.00635696	0.457654	CA-CN
Bbx	236.441	-0.463838	0.169497	-2.73655	0.00620869	0.457654	CA-CN
Zfp119a	71.6008	-0.495007	0.182087	-2.71852	0.00655745	0.457654	CA-CN
Hps5	368.72	-0.356095	0.130114	-2.73678	0.00620433	0.457654	CA-CN
Fn1	350.599	-0.382389	0.140467	-2.72227	0.00648346	0.457654	CA-CN
Trf	961.045	0.412263	0.152792	2.6982	0.0069716	0.465817	CA-CN
Ramp1	203.277	0.46058	0.170578	2.70011	0.00693159	0.465817	CA-CN
Scaf4	304.947	-0.408956	0.151555	-2.6984	0.00696731	0.465817	CA-CN
Rps15	1146.47	0.440928	0.163369	2.69897	0.0069554	0.465817	CA-CN
H2-Q5	126.402	-0.47707	0.177347	-2.69003	0.00714457	0.466486	CA-CN
Arl6ip4	98.6527	0.480969	0.178641	2.69237	0.00709466	0.466486	CA-CN
Piezo1	1211.22	-0.327334	0.121628	-2.69128	0.00711784	0.466486	CA-CN
Cp	86.4289	-0.45652	0.169927	-2.68657	0.00721909	0.466486	CA-CN
Xrn1	267.226	-0.471862	0.175622	-2.6868	0.00721402	0.466486	CA-CN
H3f3a	297.077	0.393844	0.146857	2.68182	0.00732218	0.469527	CA-CN
S100a11	271.974	0.448139	0.167215	2.68002	0.00736175	0.469527	CA-CN
Lilr4b	59.2177	-0.491934	0.183822	-2.67613	0.00744769	0.471943	CA-CN
Klra2	985.491	-0.406188	0.151958	-2.67303	0.00751703	0.473211	CA-CN
Gm31938	8.43137	-0.489259	0.183601	-2.66479	0.00770369	0.473211	CA-CN
2810474O19Rik	528.8	-0.383699	0.144	-2.66457	0.00770858	0.473211	CA-CN
Tsg101	114.625	0.421675	0.158007	2.6687	0.00761447	0.473211	CA-CN
Igsf9	73.4664	-0.500509	0.187421	-2.6705	0.00757373	0.473211	CA-CN
Snhg3	30.4073	0.50747	0.190682	2.66135	0.00778288	0.474804	CA-CN
4932438A13Rik	291.582	-0.508988	0.192036	-2.65049	0.00803763	0.487318	CA-CN
Prkar2b	15.8736	-0.504591	0.193619	-2.60611	0.00915779	0.493372	CA-CN
Mki67	129.277	-0.507269	0.192847	-2.63042	0.00852784	0.493372	CA-CN
BC035044	220.937	-0.40077	0.152599	-2.6263	0.00863186	0.493372	CA-CN
Pgap1	112.365	-0.504934	0.193585	-2.60833	0.00909842	0.493372	CA-CN
C920006O11Rik	7.61945	0.459716	0.174409	2.63585	0.00839258	0.493372	CA-CN
Tmcc3	49.8335	-0.481223	0.184831	-2.60358	0.00922544	0.493372	CA-CN
Usp15	373.793	-0.317298	0.12064	-2.63013	0.00853529	0.493372	CA-CN
Mrpl13	67.9799	0.466402	0.178374	2.61475	0.0089293	0.493372	CA-CN
Kmt2e	1186.79	-0.314442	0.120809	-2.60281	0.00924634	0.493372	CA-CN
Jkamp	90.4057	0.402021	0.153669	2.61616	0.00889254	0.493372	CA-CN
Atrx	446.788	-0.478718	0.182346	-2.62533	0.0086566	0.493372	CA-CN
Spire1	30.8796	0.499436	0.188957	2.64312	0.00821464	0.493372	CA-CN
Snrnp27	74.6274	0.42095	0.159466	2.63975	0.00829664	0.493372	CA-CN
Dock11	702.471	-0.398952	0.15197	-2.6252	0.0086598	0.493372	CA-CN
Rpl13	58.113	0.501714	0.192948	2.60025	0.00931565	0.493372	CA-CN
Pmm1	48.669	0.464929	0.178328	2.60716	0.00912962	0.493372	CA-CN
Klhdc9	14.8279	0.508749	0.193993	2.62251	0.00872839	0.493372	CA-CN
Gbp7	59.4608	-0.501354	0.19045	-2.63247	0.00847656	0.493372	CA-CN
Fam49a	2566.58	-0.357946	0.13644	-2.62347	0.00870397	0.493372	CA-CN
Bphl	35.4251	0.472016	0.181598	2.59924	0.00934302	0.493372	CA-CN
Kmt2a	705.794	-0.423537	0.16231	-2.60943	0.0090694	0.493372	CA-CN
Stat1	2048.24	-0.472778	0.18046	-2.61985	0.00879694	0.493372	CA-CN
Gna15	81.8171	-0.451229	0.172772	-2.6117	0.00900922	0.493372	CA-CN
Ino80d	762.136	-0.463755	0.177901	-2.60681	0.00913894	0.493372	CA-CN
Syne3	280.369	-0.468823	0.180541	-2.59677	0.00941047	0.494276	CA-CN
Rsbn1	230.915	-0.433577	0.167175	-2.59355	0.00949913	0.496279	CA-CN
Birc6	1608.69	-0.467193	0.180408	-2.58964	0.00960763	0.497722	CA-CN
Camkk2	1317.86	-0.241604	0.0933821	-2.58726	0.00967422	0.497722	CA-CN
Mdm4	806.836	-0.406633	0.157177	-2.5871	0.00967877	0.497722	CA-CN
Setd2	557.256	-0.415435	0.160735	-2.58459	0.00974938	0.498742	CA-CN
Ndst1	186.062	-0.488918	0.189493	-2.58015	0.00987587	0.500004	CA-CN
Ms4a8a	17.6607	-0.473505	0.183511	-2.58025	0.0098728	0.500004	CA-CN
C5ar1	570.302	0.348078	0.135101	2.57643	0.00998252	0.500246	CA-CN
Rbm15	106.315	-0.449814	0.174584	-2.57649	0.009981	0.500246	CA-CN
Etaa1	57.4121	-0.454059	0.176571	-2.57153	0.010125	0.504812	CA-CN
Zmym1	63.1253	-0.443404	0.173167	-2.56055	0.0104507	0.50903	CA-CN
Sh3bp5	321.743	-0.368248	0.143899	-2.55908	0.010495	0.50903	CA-CN
Stx17	193.433	-0.38039	0.14855	-2.56069	0.0104465	0.50903	CA-CN
Golgb1	275.486	-0.372811	0.14573	-2.55823	0.0105206	0.50903	CA-CN
Fnbp4	599.985	-0.276608	0.108039	-2.56025	0.0104596	0.50903	CA-CN
Ldlr	853.557	-0.313648	0.122448	-2.56147	0.010423	0.50903	CA-CN
Arhgap5	29.1829	-0.486249	0.19055	-2.55182	0.0107161	0.510939	CA-CN
Zfp318	63.5732	-0.465977	0.18255	-2.5526	0.0106921	0.510939	CA-CN
Vapb	436.659	0.269068	0.105313	2.55494	0.0106206	0.510939	CA-CN
Bclaf1	375.955	-0.365241	0.143972	-2.53689	0.0111843	0.511014	CA-CN
Lilra6	14.8092	-0.47929	0.189553	-2.52853	0.0114543	0.511014	CA-CN
Entpd1	325.748	-0.344255	0.135197	-2.54633	0.0108863	0.511014	CA-CN
Wwp1	149.862	-0.424636	0.167716	-2.53188	0.0113453	0.511014	CA-CN
Lpin2	332.22	-0.427703	0.169249	-2.52706	0.0115022	0.511014	CA-CN
Syt11	98.9858	0.403464	0.160057	2.52076	0.0117103	0.511014	CA-CN
Tnfrsf14	103.899	-0.490986	0.194182	-2.52848	0.0114557	0.511014	CA-CN
Ccdc88a	400.652	-0.485078	0.190393	-2.54777	0.0108414	0.511014	CA-CN
Zfhx3	386.462	-0.357593	0.14071	-2.54135	0.0110425	0.511014	CA-CN
Tnrc6b	552.157	-0.390732	0.154359	-2.53132	0.0113633	0.511014	CA-CN
Nsmce4a	264.085	0.337398	0.133273	2.53163	0.0113533	0.511014	CA-CN
Far1os	8.00546	-0.42916	0.168968	-2.53989	0.0110889	0.511014	CA-CN
Grk3	4698.25	-0.341869	0.135762	-2.51816	0.0117971	0.511014	CA-CN
Psme2b	413.062	-0.326604	0.13001	-2.51215	0.0119998	0.511014	CA-CN
Alg5	147.051	0.377629	0.150005	2.51745	0.0118209	0.511014	CA-CN
Cldn15	35.3997	0.463097	0.182408	2.5388	0.0111235	0.511014	CA-CN
Fastkd1	30.7867	-0.477205	0.189639	-2.51639	0.0118565	0.511014	CA-CN
Bcor	432.565	-0.346224	0.137768	-2.5131	0.0119676	0.511014	CA-CN
St3gal1	2111.81	-0.31431	0.123462	-2.54581	0.0109023	0.511014	CA-CN
Ctsa	3993.98	0.304799	0.120533	2.52875	0.0114469	0.511014	CA-CN
Hook3	400.454	-0.467326	0.185141	-2.52417	0.0115973	0.511014	CA-CN
Klhl28	51.6706	-0.491097	0.193381	-2.53954	0.0110999	0.511014	CA-CN
Thoc2	471.106	-0.376294	0.149705	-2.51357	0.0119515	0.511014	CA-CN
Srsf9	281.492	0.338904	0.13449	2.51992	0.0117382	0.511014	CA-CN
BC005624	93.4238	0.414965	0.165219	2.51161	0.0120183	0.511014	CA-CN
Cactin	169.208	0.354391	0.142147	2.49313	0.0126623	0.521111	CA-CN
Kctd12b	161.11	-0.396301	0.158373	-2.50232	0.0123382	0.521111	CA-CN
Zc3h11a	495.918	-0.335452	0.134583	-2.49253	0.0126836	0.521111	CA-CN
Ceacam16	7.47965	-0.453378	0.181806	-2.49374	0.0126404	0.521111	CA-CN
Irgm1	428.845	-0.47441	0.190076	-2.49589	0.0125641	0.521111	CA-CN
Mcat	28.2943	0.462719	0.185245	2.49788	0.012494	0.521111	CA-CN
Gan	12.2885	-0.456122	0.183098	-2.49114	0.0127333	0.521111	CA-CN
Vasn	36.3901	-0.475256	0.190613	-2.49331	0.0126559	0.521111	CA-CN
AW549877	443.031	-0.401423	0.160995	-2.49339	0.0126529	0.521111	CA-CN
Mapk13	17.8639	0.482847	0.194185	2.48653	0.0128996	0.523552	CA-CN
L1cam	1998.97	-0.333817	0.134206	-2.48734	0.0128703	0.523552	CA-CN
Hspa1b	39.3977	-0.464763	0.193803	-2.39812	0.0164795	0.532083	CA-CN
Ncoa2	531.882	-0.406107	0.166329	-2.44158	0.014623	0.532083	CA-CN
Zfp871	802.936	-0.442215	0.183375	-2.41154	0.0158854	0.532083	CA-CN
Dusp11	753.877	-0.33388	0.136005	-2.45491	0.0140918	0.532083	CA-CN
Akt1	2122.52	0.236137	0.0995017	2.37319	0.017635	0.532083	CA-CN
Hltf	248.169	-0.371668	0.150349	-2.47203	0.0134347	0.532083	CA-CN
Kmt2c	732.402	-0.441297	0.180335	-2.44709	0.0144014	0.532083	CA-CN
Leng8	1912.85	-0.322235	0.133766	-2.40895	0.0159984	0.532083	CA-CN
Arid1a	1412.68	-0.320856	0.133097	-2.41068	0.0159227	0.532083	CA-CN
Fam135a	39.5236	-0.465749	0.189132	-2.46255	0.0137952	0.532083	CA-CN
Scd2	404.094	-0.441141	0.184533	-2.39059	0.0168214	0.532083	CA-CN
Zfp54	18.2791	-0.461214	0.19412	-2.37593	0.0175049	0.532083	CA-CN
Rbm4b	54.038	-0.423033	0.171629	-2.46482	0.0137082	0.532083	CA-CN
Pmf1	44.5265	0.454622	0.185608	2.44936	0.0143108	0.532083	CA-CN
Chd1	365.417	-0.389131	0.161123	-2.41511	0.0157305	0.532083	CA-CN
Dgkh	124.961	-0.441809	0.185414	-2.38283	0.0171803	0.532083	CA-CN
Adck5	21.8901	0.464494	0.19417	2.39221	0.0167474	0.532083	CA-CN
Npat	74.7176	-0.431794	0.181336	-2.38119	0.0172569	0.532083	CA-CN
Neurl2	36.259	0.445292	0.18785	2.37047	0.0177654	0.532083	CA-CN
Nab1	942.06	-0.301139	0.124179	-2.42503	0.015307	0.532083	CA-CN
Bmpr2	538.075	-0.443059	0.180501	-2.4546	0.0141042	0.532083	CA-CN
Akap9	154.368	-0.438811	0.185633	-2.36386	0.0180856	0.532083	CA-CN
Mccc1	23.5044	-0.465489	0.192555	-2.41744	0.0156302	0.532083	CA-CN
Bcl2	925.764	-0.421523	0.178097	-2.36681	0.017942	0.532083	CA-CN
S100a1	16.7334	0.470729	0.193962	2.42691	0.015228	0.532083	CA-CN
Rab43	916.282	-0.309698	0.129716	-2.38752	0.0169627	0.532083	CA-CN
Flot2	267.676	0.312803	0.129803	2.40984	0.0159596	0.532083	CA-CN
Tapbpl	365.765	-0.347281	0.140215	-2.47678	0.0132574	0.532083	CA-CN
Nipbl	811.355	-0.404579	0.170993	-2.36605	0.0179788	0.532083	CA-CN
Rbm41	81.531	-0.422173	0.178607	-2.3637	0.0180936	0.532083	CA-CN
Mrps21	76.4146	0.439683	0.181468	2.42293	0.015396	0.532083	CA-CN
Slc36a4	24.7119	-0.466018	0.193859	-2.4039	0.0162214	0.532083	CA-CN
Gtf3c5	83.5165	0.392537	0.163316	2.40354	0.0162374	0.532083	CA-CN
Brpf3	230.573	-0.310121	0.129132	-2.40158	0.0163245	0.532083	CA-CN
Kmt2d	1508.36	-0.430039	0.177147	-2.42758	0.0152	0.532083	CA-CN
Lgmn	926.211	0.288146	0.121903	2.36372	0.0180925	0.532083	CA-CN
Map3k20	149.605	-0.416266	0.173718	-2.39621	0.0165655	0.532083	CA-CN
Zfp445	488.419	-0.408284	0.171905	-2.37506	0.0175462	0.532083	CA-CN
Utp20	106.929	-0.425891	0.17537	-2.42853	0.01516	0.532083	CA-CN
Cmah	84.6946	-0.46337	0.192766	-2.4038	0.0162258	0.532083	CA-CN
Uqcr11	58.9596	0.444365	0.185293	2.39817	0.0164771	0.532083	CA-CN
Ly9	296.669	-0.404288	0.163592	-2.47133	0.0134613	0.532083	CA-CN
Mad1l1	124.07	0.380413	0.157274	2.41879	0.015572	0.532083	CA-CN
Atp7a	648.333	-0.424083	0.175925	-2.4106	0.0159264	0.532083	CA-CN
Utrn	489.533	-0.404308	0.169879	-2.37997	0.0173139	0.532083	CA-CN
Alpk1	342.755	-0.425504	0.179093	-2.37589	0.0175067	0.532083	CA-CN
Cpeb4	247.443	-0.452231	0.184343	-2.4532	0.0141591	0.532083	CA-CN
Gm16023	13.0198	-0.467303	0.188571	-2.47813	0.0132073	0.532083	CA-CN
Dmxl1	159.748	-0.451925	0.190994	-2.36617	0.017973	0.532083	CA-CN
Dnajc9	55.7832	0.399423	0.168174	2.37506	0.017546	0.532083	CA-CN
Haus4	56.1857	0.412559	0.173377	2.37955	0.0173339	0.532083	CA-CN
Fam207a	178.07	0.337509	0.141436	2.38629	0.0170192	0.532083	CA-CN
Fnbp1	511.749	-0.35077	0.143502	-2.44435	0.0145112	0.532083	CA-CN
Morf4l1	92.1629	0.391457	0.161687	2.42108	0.0154743	0.532083	CA-CN
Adora2b	81.3301	0.379084	0.153853	2.46394	0.013742	0.532083	CA-CN
A330069E16Rik	3.70523	0.365769	0.153989	2.3753	0.0175348	0.532083	CA-CN
Bod1l	531.48	-0.344505	0.14562	-2.36578	0.0179919	0.532083	CA-CN
5530601H04Rik	81.7379	-0.424646	0.17914	-2.37046	0.0177658	0.532083	CA-CN
Ralgps2	73.6809	-0.429549	0.181356	-2.36854	0.0178584	0.532083	CA-CN
Ralgapa1	278.9	-0.420446	0.176644	-2.38019	0.0173036	0.532083	CA-CN
Ly75	22.6852	-0.45724	0.190656	-2.39824	0.0164739	0.532083	CA-CN
Zfp800	119.444	-0.433632	0.179786	-2.41193	0.0158683	0.532083	CA-CN
Aim2	445.351	-0.304275	0.126437	-2.40654	0.0161045	0.532083	CA-CN
Gne	122.494	0.381866	0.15575	2.45179	0.0142147	0.532083	CA-CN
Spag11b	14.145	0.452512	0.190137	2.37992	0.0173163	0.532083	CA-CN
Lncpint	11.6326	-0.467893	0.190411	-2.45728	0.0139992	0.532083	CA-CN
Sstr4	91.7512	-0.462199	0.193897	-2.38373	0.0171383	0.532083	CA-CN
Jak3	247.525	0.351752	0.143127	2.45762	0.0139861	0.532083	CA-CN
Ttc17	329.902	-0.329844	0.138062	-2.3891	0.0168895	0.532083	CA-CN
Bmx	176.312	0.37016	0.155134	2.38607	0.0170296	0.532083	CA-CN
Prrc2c	904.91	-0.44438	0.1799	-2.47015	0.0135058	0.532083	CA-CN
Aarsd1	43.6218	0.434996	0.17667	2.46219	0.0138092	0.532083	CA-CN
Lysmd3	85.0278	-0.461802	0.193735	-2.38367	0.0171409	0.532083	CA-CN
Fyco1	261.126	-0.410123	0.17163	-2.38958	0.0168679	0.532083	CA-CN
Zeb1	32.6344	-0.460691	0.191936	-2.40023	0.0163849	0.532083	CA-CN
1700034P13Rik	18.6472	-0.439452	0.178037	-2.46832	0.0135749	0.532083	CA-CN
Nr3c1	750.355	-0.411004	0.168341	-2.4415	0.0146265	0.532083	CA-CN
Cd2ap	444.698	-0.398294	0.162291	-2.45419	0.0141202	0.532083	CA-CN
Irf1	1197.88	-0.424783	0.175571	-2.41944	0.0155444	0.532083	CA-CN
Habp4	67.334	0.395891	0.163656	2.41905	0.0155612	0.532083	CA-CN
Il1b	859.997	0.452985	0.18438	2.45681	0.0140178	0.532083	CA-CN
Lpl	119.911	-0.465677	0.188279	-2.47333	0.013386	0.532083	CA-CN
Pla2g15	301.1	0.356925	0.144617	2.46806	0.0135848	0.532083	CA-CN
Akt3	367.08	-0.375183	0.156059	-2.4041	0.0162123	0.532083	CA-CN
Ufm1	141.996	0.331107	0.137568	2.40685	0.0160906	0.532083	CA-CN
Abtb2	61.7927	-0.427579	0.179323	-2.3844	0.0171069	0.532083	CA-CN
Tlr1	122.527	-0.408366	0.170305	-2.39784	0.016492	0.532083	CA-CN
Guk1	90.5732	0.409376	0.171728	2.38387	0.0171317	0.532083	CA-CN
Psme4	407.972	-0.298195	0.123894	-2.40685	0.0160909	0.532083	CA-CN
Ccnt2	263.917	-0.410107	0.16893	-2.42767	0.015196	0.532083	CA-CN
Lcmt2	58.1642	0.413609	0.169621	2.43844	0.014751	0.532083	CA-CN
Rc3h2	358.179	-0.439513	0.182543	-2.40772	0.0160527	0.532083	CA-CN
Atraid	184.566	0.385383	0.163134	2.36237	0.0181586	0.532398	CA-CN
Ficd	41.077	0.43821	0.185743	2.35923	0.0183128	0.535321	CA-CN
Psmd10	94.578	0.353748	0.150204	2.35512	0.0185169	0.538233	CA-CN
Adcy7	3323.18	-0.321189	0.136385	-2.35502	0.018522	0.538233	CA-CN
Phip	545.022	-0.364973	0.155142	-2.35251	0.0186474	0.540279	CA-CN
Aacs	141.606	-0.359073	0.152746	-2.35079	0.0187337	0.540945	CA-CN
Srrm2	3125.4	-0.4047	0.172223	-2.34986	0.0187805	0.540945	CA-CN
Axl	31.9337	-0.454666	0.193594	-2.34856	0.0188464	0.541256	CA-CN
Fbxl17	150.981	-0.353018	0.150402	-2.34717	0.0189167	0.541282	CA-CN
Casp8ap2	117.169	-0.408438	0.174233	-2.3442	0.0190678	0.541282	CA-CN
Cyfip2	2981.71	-0.386746	0.164979	-2.34422	0.0190671	0.541282	CA-CN
Rab11fip1	448.693	-0.351521	0.149927	-2.34461	0.0190468	0.541282	CA-CN
Kctd12	1063.27	-0.400315	0.170932	-2.34195	0.0191835	0.542406	CA-CN
Fam96a	342.12	0.309223	0.132075	2.34128	0.0192178	0.542406	CA-CN
Gcnt1	192.358	-0.412493	0.176414	-2.33821	0.0193764	0.543539	CA-CN
Jarid2	730.315	-0.312735	0.133781	-2.33767	0.0194043	0.543539	CA-CN
Fam178a	247.647	-0.401269	0.171681	-2.33729	0.019424	0.543539	CA-CN
Pla2g7	1413.71	0.339088	0.145379	2.33244	0.0196776	0.547515	CA-CN
Tlr4	271.949	-0.388233	0.166443	-2.33253	0.019673	0.547515	CA-CN
B4galt6	43.8652	0.44377	0.190743	2.32653	0.0199903	0.554647	CA-CN
Rps6ka3	532.869	-0.399603	0.171949	-2.32397	0.0201272	0.555178	CA-CN
Med13	509.74	-0.433193	0.186478	-2.32303	0.0201776	0.555178	CA-CN
Vopp1	138.771	0.382048	0.164538	2.32195	0.0202356	0.555178	CA-CN
Impa1	222.98	0.311359	0.134073	2.3223	0.0202166	0.555178	CA-CN
Dnm1l	187.146	-0.324017	0.139735	-2.31879	0.0204063	0.558304	CA-CN
Atxn7	247.257	-0.378948	0.163545	-2.31708	0.0204992	0.558984	CA-CN
Eid1	114.118	0.384605	0.166047	2.31624	0.020545	0.558984	CA-CN
Gm5547	72.3	0.393634	0.170245	2.31215	0.0207693	0.560608	CA-CN
Megf9	211.509	-0.430162	0.186253	-2.30956	0.0209123	0.560608	CA-CN
Ino80	296.654	-0.316747	0.137305	-2.30688	0.0210613	0.560608	CA-CN
Gm5643	30.2239	-0.446877	0.193559	-2.30873	0.0209585	0.560608	CA-CN
Epb41l1	51.1042	-0.419063	0.181499	-2.3089	0.0209492	0.560608	CA-CN
Socs4	87.7092	-0.447142	0.193653	-2.30898	0.0209444	0.560608	CA-CN
Far1	645.334	-0.37678	0.163091	-2.31024	0.0208747	0.560608	CA-CN
Huwe1	980.754	-0.399675	0.173243	-2.30702	0.0210537	0.560608	CA-CN
Zfp397	212.002	-0.37992	0.164937	-2.30342	0.0212553	0.561324	CA-CN
Myo9a	103.905	-0.397506	0.172531	-2.30396	0.0212249	0.561324	CA-CN
Tsen34	51.9374	0.414986	0.180167	2.30334	0.0212597	0.561324	CA-CN
Calm3	546.701	0.236074	0.102903	2.29414	0.0217823	0.564502	CA-CN
Ear12	2497.61	0.255545	0.111218	2.29769	0.0215797	0.564502	CA-CN
Itga4	6704.02	-0.405769	0.176641	-2.29714	0.0216107	0.564502	CA-CN
H3f3b	893.422	0.29252	0.127278	2.29828	0.021546	0.564502	CA-CN
Zfp948	21.911	-0.441317	0.192366	-2.29415	0.0217817	0.564502	CA-CN
Rpl35a	82.4383	0.440195	0.191799	2.29508	0.0217285	0.564502	CA-CN
Bcl9	96.2412	-0.360277	0.156629	-2.30018	0.0214378	0.564502	CA-CN
Ear3	2499.21	0.255232	0.111303	2.29312	0.021841	0.564531	CA-CN
Vcpip1	481.131	-0.390803	0.170631	-2.29034	0.0220015	0.564899	CA-CN
Ranbp2	497.131	-0.412126	0.179827	-2.2918	0.0219174	0.564899	CA-CN
Jmjd1c	399.463	-0.415339	0.18138	-2.28989	0.0220277	0.564899	CA-CN
Naa38	55.3484	0.407773	0.17824	2.28777	0.0221509	0.566579	CA-CN
Nampt	289.076	-0.354328	0.154974	-2.28638	0.0222322	0.567182	CA-CN
Arv1	11.0501	-0.429334	0.188079	-2.28273	0.0224462	0.568213	CA-CN
Smpd2	78.6124	0.379772	0.166246	2.2844	0.022348	0.568213	CA-CN
Mtch1	307.51	0.297564	0.130339	2.28301	0.0224299	0.568213	CA-CN
Naip7	584.053	-0.435098	0.190691	-2.28169	0.0225076	0.568302	CA-CN
Nfil3	164.779	0.429441	0.18894	2.2729	0.0230322	0.568327	CA-CN
Tab1	96.766	0.392753	0.172867	2.27199	0.0230872	0.568327	CA-CN
Grap2	147.598	-0.373296	0.163911	-2.27743	0.0227603	0.568327	CA-CN
Cd84	234.233	-0.384606	0.169211	-2.27294	0.0230296	0.568327	CA-CN
Btla	33.2909	-0.441837	0.194144	-2.27582	0.022857	0.568327	CA-CN
Timm17a	49.1703	0.390383	0.171382	2.27785	0.0227355	0.568327	CA-CN
Fryl	427.908	-0.399283	0.175598	-2.27385	0.0229748	0.568327	CA-CN
Ctsl	89.0707	0.367984	0.161944	2.27229	0.0230692	0.568327	CA-CN
Pdlim2	132.917	0.318276	0.140082	2.27207	0.023082	0.568327	CA-CN
Tmem106b	234.148	-0.363353	0.159484	-2.2783	0.0227088	0.568327	CA-CN
Ppip5k2	238.942	-0.388967	0.17139	-2.26949	0.0232387	0.570625	CA-CN
Tsfm	33.992	0.418836	0.184746	2.2671	0.0233844	0.571114	CA-CN
Naa10	70.5261	0.376883	0.166263	2.26678	0.0234034	0.571114	CA-CN
Setd1b	701.333	-0.332138	0.146555	-2.2663	0.023433	0.571114	CA-CN
Rps21	365.877	0.388132	0.171379	2.26476	0.0235274	0.571996	CA-CN
Fam20a	86.7617	0.405342	0.179288	2.26084	0.0237689	0.572266	CA-CN
Krit1	185.275	-0.328663	0.145298	-2.26199	0.0236983	0.572266	CA-CN
Phf23	213.987	0.307897	0.136139	2.26164	0.0237196	0.572266	CA-CN
Ubn2	419.522	-0.354949	0.157001	-2.2608	0.0237716	0.572266	CA-CN
Ptma	514.571	0.34587	0.154037	2.24537	0.0247446	0.574108	CA-CN
Relb	229.514	0.318671	0.142127	2.24216	0.0249511	0.574108	CA-CN
Abt1	62.8703	0.387801	0.171999	2.25467	0.0241541	0.574108	CA-CN
Dgcr14	111.485	0.336	0.148823	2.25772	0.023963	0.574108	CA-CN
Atp8b4	442.2	-0.360733	0.160576	-2.24649	0.0246727	0.574108	CA-CN
Bcl2l1	83.7453	0.363543	0.162213	2.24114	0.0250171	0.574108	CA-CN
Rps9	1345.83	0.340656	0.151288	2.25171	0.0243404	0.574108	CA-CN
Cisd1	65.3258	0.391548	0.173597	2.2555	0.0241021	0.574108	CA-CN
Nckap1l	3251.91	-0.314669	0.139807	-2.25073	0.0244028	0.574108	CA-CN
Mul1	110.123	0.324326	0.144658	2.24202	0.0249598	0.574108	CA-CN
Insl3	14.0241	0.422613	0.188523	2.24171	0.0249804	0.574108	CA-CN
Cox11	33.0312	-0.417674	0.185695	-2.24925	0.0244963	0.574108	CA-CN
Plekha6	100.612	0.348884	0.155422	2.24475	0.0247843	0.574108	CA-CN
Nrp1	601.376	-0.34482	0.153783	-2.24225	0.0249454	0.574108	CA-CN
Ubac2	375.492	0.258724	0.115422	2.24154	0.0249908	0.574108	CA-CN
Cep350	487.332	-0.410795	0.182596	-2.24975	0.0244646	0.574108	CA-CN
Acap2	767.186	-0.369833	0.16449	-2.24837	0.0245526	0.574108	CA-CN
Psma2	285.835	0.285389	0.12667	2.25301	0.0242587	0.574108	CA-CN
1700099I09Rik	3.3914	-0.287613	0.127467	-2.25638	0.0240471	0.574108	CA-CN
Tnfaip2	519.226	-0.381543	0.169969	-2.24477	0.0247827	0.574108	CA-CN
Slfn2	1714.48	0.256144	0.114556	2.23598	0.025353	0.575096	CA-CN
Ipo7	268.385	-0.424351	0.189529	-2.23898	0.0251573	0.575096	CA-CN
Srek1	116.664	-0.320331	0.143177	-2.2373	0.0252666	0.575096	CA-CN
Bloc1s4	57.2584	0.381485	0.170551	2.23678	0.0253009	0.575096	CA-CN
Ifi47	262.723	-0.432376	0.193331	-2.23646	0.0253219	0.575096	CA-CN
Kcna3	18.207	-0.374513	0.168356	-2.22453	0.0261126	0.576854	CA-CN
Pde6d	98.5616	0.353713	0.15842	2.23276	0.0255649	0.576854	CA-CN
Gm12250	140.933	-0.423949	0.189797	-2.2337	0.0255028	0.576854	CA-CN
Xbp1	1812.08	0.212132	0.0953654	2.22441	0.0261208	0.576854	CA-CN
Pcm1	205.79	-0.389202	0.175062	-2.22322	0.026201	0.576854	CA-CN
Chml	56.0896	-0.427887	0.192425	-2.22365	0.0261719	0.576854	CA-CN
Zfp809	66.4873	-0.391206	0.175508	-2.22899	0.0258143	0.576854	CA-CN
Prkx	405.245	-0.309386	0.138823	-2.22863	0.0258383	0.576854	CA-CN
Ndufs6	69.932	0.398688	0.179349	2.22297	0.0262177	0.576854	CA-CN
Nav1	773.067	-0.287258	0.128905	-2.22844	0.0258509	0.576854	CA-CN
Emc7	223.157	0.325076	0.146099	2.22505	0.0260781	0.576854	CA-CN
Gcc2	92.9649	-0.408853	0.183964	-2.22245	0.0262527	0.576854	CA-CN
Zfp638	388.667	-0.368711	0.165473	-2.22823	0.0258654	0.576854	CA-CN
Capg	30.3074	-0.423625	0.190046	-2.22906	0.0258097	0.576854	CA-CN
Cdk6	263.16	-0.388908	0.175304	-2.21848	0.0265222	0.57789	CA-CN
Gpr141	865.524	-0.361196	0.162932	-2.21685	0.0266336	0.57789	CA-CN
Rpp25l	55.509	0.410591	0.185008	2.21931	0.0264654	0.57789	CA-CN
Zfp790	81.5316	-0.364602	0.164456	-2.21702	0.026622	0.57789	CA-CN
Phf20l1	453.467	-0.292194	0.131925	-2.21485	0.0267705	0.57789	CA-CN
Mmgt2	108.066	0.356873	0.160787	2.21954	0.0264501	0.57789	CA-CN
Xist	2658.04	-0.427943	0.19319	-2.21514	0.0267506	0.57789	CA-CN
Uvssa	97.9473	-0.399536	0.180376	-2.21502	0.0267586	0.57789	CA-CN
Rap1gap2	3775.86	-0.327404	0.147906	-2.2136	0.0268563	0.578471	CA-CN
Bcl3	236.8	0.3528	0.159513	2.21174	0.0269849	0.579969	CA-CN
Gphn	51.6021	-0.385261	0.174351	-2.20969	0.027127	0.58175	CA-CN
Atxn2l	1223.99	-0.27566	0.124801	-2.20879	0.027189	0.581809	CA-CN
Snrpd1	41.2082	0.415675	0.189024	2.19906	0.0278737	0.582993	CA-CN
Dnajc15	74.315	0.401274	0.182307	2.20109	0.0277299	0.582993	CA-CN
Vegfc	193.437	0.368112	0.167191	2.20175	0.0276833	0.582993	CA-CN
Mov10	62.8784	-0.355836	0.1618	-2.19923	0.0278612	0.582993	CA-CN
Cdc42ep2	399.032	0.265022	0.120238	2.20415	0.0275141	0.582993	CA-CN
Zfp329	100.008	-0.408588	0.185829	-2.19873	0.0278972	0.582993	CA-CN
Gbp5	117.273	-0.427151	0.193919	-2.20273	0.0276138	0.582993	CA-CN
C1qbp	71.7298	0.359401	0.162913	2.2061	0.0273772	0.582993	CA-CN
Hspa8	594.073	-0.33794	0.15354	-2.20099	0.0277366	0.582993	CA-CN
Rpl41	142.619	0.362557	0.16488	2.19892	0.0278838	0.582993	CA-CN
Chd9	358.402	-0.405151	0.183738	-2.20505	0.0274507	0.582993	CA-CN
Ptges2	43.5093	0.413856	0.188423	2.19642	0.0280617	0.585184	CA-CN
Hspa4l	37.7432	-0.422731	0.192556	-2.19537	0.0281371	0.585514	CA-CN
Nepro	59.7904	-0.378817	0.172962	-2.19017	0.0285119	0.586655	CA-CN
Lsr	45.9331	0.422241	0.192655	2.19169	0.0284017	0.586655	CA-CN
Zfp276	314.065	-0.259794	0.118666	-2.18928	0.0285763	0.586655	CA-CN
Vps13b	530.778	-0.386872	0.176623	-2.19038	0.0284969	0.586655	CA-CN
Myo5a	325.243	-0.387941	0.17717	-2.18965	0.0285493	0.586655	CA-CN
Pfkfb2	79.654	-0.405328	0.185181	-2.18882	0.02861	0.586655	CA-CN
Dffb	50.0722	-0.395175	0.180292	-2.19186	0.0283896	0.586655	CA-CN
Tcf12	112.359	-0.325651	0.148934	-2.18655	0.0287756	0.58882	CA-CN
Cox4i1	674.766	0.343836	0.157556	2.18231	0.0290869	0.589005	CA-CN
Mrpl52	98.2974	0.402635	0.184436	2.18306	0.0290314	0.589005	CA-CN
Abhd12	1837.92	0.286918	0.131424	2.18316	0.0290244	0.589005	CA-CN
Pde4b	611.624	-0.330392	0.151304	-2.18363	0.0289897	0.589005	CA-CN
Mrps26	86.565	0.398847	0.182846	2.18133	0.0291591	0.589005	CA-CN
Twf2	424.539	0.302253	0.138321	2.18516	0.0288769	0.589005	CA-CN
Tet2	963.037	-0.402009	0.184347	-2.18072	0.0292044	0.589005	CA-CN
B3galt6	15.7284	0.417734	0.192043	2.17521	0.0296144	0.59038	CA-CN
Eea1	109.147	-0.405649	0.186559	-2.17437	0.0296772	0.59038	CA-CN
Mysm1	258.007	-0.413349	0.189752	-2.17836	0.0293791	0.59038	CA-CN
Stxbp6	28.465	-0.421066	0.193516	-2.17588	0.0295644	0.59038	CA-CN
Rp9	119.791	0.368943	0.169639	2.17487	0.02964	0.59038	CA-CN
Zbp1	932.355	-0.33293	0.153154	-2.17382	0.0297185	0.59038	CA-CN
Rasgef1b	44.8691	-0.41071	0.188927	-2.17391	0.029712	0.59038	CA-CN
Akna	2239.75	-0.295089	0.135776	-2.17336	0.0297534	0.59038	CA-CN
Acp5	426.681	0.319973	0.147754	2.16558	0.0303434	0.591611	CA-CN
2310015A10Rik	159.13	-0.338108	0.156142	-2.16539	0.0303576	0.591611	CA-CN
Selenok	214.029	0.323993	0.14944	2.16805	0.0301548	0.591611	CA-CN
Ndufaf8	27.7465	0.405005	0.18702	2.16558	0.0303434	0.591611	CA-CN
Tcf19	13.5915	0.411163	0.189532	2.16936	0.0300554	0.591611	CA-CN
Srgap2	305.7	-0.281407	0.12959	-2.17151	0.0298927	0.591611	CA-CN
Gm16675	52.863	-0.409251	0.188869	-2.16685	0.0302465	0.591611	CA-CN
Fndc9	28.3626	-0.412229	0.190052	-2.16903	0.0300801	0.591611	CA-CN
Ammecr1	20.6695	-0.41611	0.191997	-2.16727	0.0302141	0.591611	CA-CN
Zfp658	21.9467	-0.419913	0.194013	-2.16436	0.0304368	0.591982	CA-CN
Fyb	4259.6	-0.258304	0.119419	-2.16302	0.0305399	0.592422	CA-CN
Plekhm3	997.083	-0.327051	0.151238	-2.16249	0.0305801	0.592422	CA-CN
Mars2	22.9317	-0.416317	0.193537	-2.1511	0.0314686	0.592865	CA-CN
Uqcc3	54.1854	0.398637	0.184826	2.15682	0.0310196	0.592865	CA-CN
Strap	323.024	0.244681	0.113967	2.14694	0.0317978	0.592865	CA-CN
Cdk12	263.394	-0.390787	0.181123	-2.15758	0.0309603	0.592865	CA-CN
Zfp935	45.4402	-0.409205	0.189352	-2.16108	0.0306895	0.592865	CA-CN
Syvn1	264.491	-0.264582	0.123278	-2.14622	0.0318553	0.592865	CA-CN
Cebpb	4428.78	0.342845	0.159515	2.1493	0.0316108	0.592865	CA-CN
Ubr1	202.332	-0.345465	0.16025	-2.15579	0.0311004	0.592865	CA-CN
Hivep1	340.137	-0.392621	0.182656	-2.14951	0.031594	0.592865	CA-CN
Slamf8	157.955	-0.390101	0.181557	-2.14865	0.0316625	0.592865	CA-CN
Sf3b4	62.62	0.386009	0.179864	2.14611	0.031864	0.592865	CA-CN
4930426L09Rik	10.6594	0.407741	0.189503	2.15164	0.0314259	0.592865	CA-CN
Pfdn2	60.646	0.39566	0.183303	2.1585	0.0308893	0.592865	CA-CN
Fam63b	411.441	-0.329389	0.153488	-2.14603	0.0318705	0.592865	CA-CN
Commd8	247.866	-0.274869	0.127691	-2.15261	0.0313495	0.592865	CA-CN
Atp5j	146.109	0.341992	0.158793	2.15369	0.0312642	0.592865	CA-CN
Pbxip1	3510.19	0.280839	0.130863	2.14605	0.0318689	0.592865	CA-CN
Sos1	162.542	-0.385669	0.179128	-2.15304	0.0313156	0.592865	CA-CN
Rnf169	341.744	-0.303733	0.140685	-2.15896	0.0308534	0.592865	CA-CN
Gm16982	29.1684	-0.409648	0.190852	-2.14641	0.0318401	0.592865	CA-CN
Dstyk	545.059	-0.336921	0.156672	-2.15049	0.0315163	0.592865	CA-CN
Xiap	873.805	-0.381426	0.177905	-2.14399	0.0320334	0.594767	CA-CN
Fam212a	7.56091	-0.378494	0.177978	-2.12664	0.0334503	0.595488	CA-CN
Ankib1	218.262	-0.367565	0.171628	-2.14164	0.0322223	0.595488	CA-CN
Gramd1b	65.574	-0.40201	0.190221	-2.11338	0.0345683	0.595488	CA-CN
Cbx5	272.385	-0.359822	0.16926	-2.12585	0.0335154	0.595488	CA-CN
Anapc1	421.393	-0.302377	0.143225	-2.11121	0.0347543	0.595488	CA-CN
Chmp4b	667.706	0.300077	0.141965	2.11374	0.0345378	0.595488	CA-CN
Gm10052	19.6521	-0.410241	0.193877	-2.11599	0.0343458	0.595488	CA-CN
Ciita	35.2014	-0.409399	0.191617	-2.13655	0.0326348	0.595488	CA-CN
Gdap2	192.014	-0.306585	0.144054	-2.12827	0.0333144	0.595488	CA-CN
Ifi30	713.511	0.354092	0.166791	2.12297	0.0337565	0.595488	CA-CN
F10	376.933	0.282436	0.133355	2.11792	0.0341818	0.595488	CA-CN
Mrpl2	72.7606	0.37994	0.179289	2.11915	0.0340778	0.595488	CA-CN
Snrpe	88.4369	0.356225	0.167526	2.12639	0.0334711	0.595488	CA-CN
Kcnrg	29.8782	-0.411344	0.192664	-2.13503	0.0327586	0.595488	CA-CN
1700029I15Rik	3.42205	0.228282	0.108119	2.11139	0.034739	0.595488	CA-CN
Itm2a	15.2379	0.409481	0.192951	2.12221	0.0338202	0.595488	CA-CN
Cmklr1	57.8008	-0.393433	0.185553	-2.12033	0.0339784	0.595488	CA-CN
Tmem141	40.5836	0.377812	0.177029	2.13418	0.0328277	0.595488	CA-CN
Prpf40a	349.436	-0.358449	0.168033	-2.1332	0.0329084	0.595488	CA-CN
Slc26a2	129.61	-0.411965	0.19329	-2.13133	0.033062	0.595488	CA-CN
Zfp768	31.9913	0.409702	0.193472	2.11763	0.0342063	0.595488	CA-CN
Cracr2a	6.64857	-0.37926	0.177352	-2.13846	0.0324797	0.595488	CA-CN
Mbnl3	116.29	-0.396198	0.185344	-2.13764	0.0325464	0.595488	CA-CN
Ddx56	100.964	0.327622	0.154278	2.12358	0.0337052	0.595488	CA-CN
Skil	548.289	-0.351426	0.165837	-2.11911	0.0340815	0.595488	CA-CN
Agps	556.082	-0.283097	0.132307	-2.13969	0.0323798	0.595488	CA-CN
Anp32b	180.925	0.310541	0.146848	2.11471	0.0344543	0.595488	CA-CN
Cd27	12.453	-0.403614	0.188647	-2.13953	0.032393	0.595488	CA-CN
Dopey1	181.807	-0.32823	0.155442	-2.11159	0.034722	0.595488	CA-CN
Ccng1	447.911	-0.276368	0.130569	-2.11665	0.03429	0.595488	CA-CN
Etfb	166.619	0.343488	0.161719	2.12398	0.0336717	0.595488	CA-CN
Palld	33.3397	0.411939	0.193035	2.13401	0.0328422	0.595488	CA-CN
Lats1	257.241	-0.369386	0.175013	-2.11063	0.0348045	0.595488	CA-CN
Mlxip	599.885	-0.350874	0.166304	-2.10983	0.0348728	0.595488	CA-CN
Ifitm5	14.5882	0.406365	0.192378	2.11233	0.0346586	0.595488	CA-CN
Zfp330	63.9213	0.364007	0.172218	2.11364	0.0345457	0.595488	CA-CN
Chd6	185.468	-0.361617	0.16998	-2.12741	0.0333859	0.595488	CA-CN
BC003965	87.808	0.373704	0.177172	2.10927	0.0349217	0.595488	CA-CN
Wdfy3	448.366	-0.377613	0.177772	-2.12414	0.0336584	0.595488	CA-CN
Aurkb	9.19039	-0.379609	0.177424	-2.13956	0.0323907	0.595488	CA-CN
Rpl8	2013.35	0.33332	0.157337	2.11852	0.0341314	0.595488	CA-CN
Uhrf2	212.782	-0.288642	0.135743	-2.12638	0.0334713	0.595488	CA-CN
4921511I17Rik	50.4542	-0.412276	0.194141	-2.12359	0.0337043	0.595488	CA-CN
2810403A07Rik	399.875	-0.235742	0.111471	-2.11483	0.0344446	0.595488	CA-CN
Cntrl	480.882	-0.332146	0.155044	-2.14227	0.0321721	0.595488	CA-CN
Ear2	2851.66	0.249154	0.117219	2.12554	0.0335414	0.595488	CA-CN
Fopnl	112.392	0.309312	0.146133	2.11665	0.0342899	0.595488	CA-CN
Tet3	439.302	-0.366101	0.173645	-2.10832	0.035003	0.595726	CA-CN
Zfp930	33.5304	-0.384836	0.182586	-2.1077	0.035057	0.595726	CA-CN
Armc7	225.574	-0.302794	0.143805	-2.10558	0.0352405	0.595753	CA-CN
Hus1	47.3131	-0.37498	0.178086	-2.10561	0.0352379	0.595753	CA-CN
Rasa1	187.513	-0.344425	0.163488	-2.10673	0.0351407	0.595753	CA-CN
Ifi207	681.018	-0.343607	0.163334	-2.1037	0.0354044	0.59647	CA-CN
Slc25a38	190.198	-0.288893	0.137284	-2.10434	0.0353485	0.59647	CA-CN
Ggcx	69.4702	-0.344971	0.164067	-2.10263	0.0354983	0.597027	CA-CN
Trim65	109.905	-0.375264	0.178548	-2.10175	0.0355754	0.597302	CA-CN
Ndufa12	26.1381	0.406428	0.193603	2.09928	0.0357919	0.598982	CA-CN
Alg10b	77.318	-0.407388	0.194084	-2.09903	0.0358143	0.598982	CA-CN
Vti1b	141.863	0.32898	0.156767	2.09853	0.0358584	0.598982	CA-CN
Primpol	147.592	-0.296838	0.141615	-2.09608	0.0360748	0.600553	CA-CN
Zfp207	678.25	-0.278895	0.133047	-2.09622	0.0360627	0.600553	CA-CN
Ddit4	713.253	0.309024	0.147509	2.09495	0.0361759	0.601217	CA-CN
Inpp4a	534.886	-0.296392	0.142747	-2.07635	0.0378619	0.601694	CA-CN
Tbrg1	160.375	0.335924	0.16107	2.08558	0.0370171	0.601694	CA-CN
Polr2a	1790.62	-0.295981	0.143014	-2.06959	0.0384906	0.601694	CA-CN
Fam216a	13.774	0.402671	0.194029	2.07531	0.0379578	0.601694	CA-CN
Hmbox1	167.424	-0.288529	0.13906	-2.07484	0.038001	0.601694	CA-CN
Ep300	1117.34	-0.367408	0.177214	-2.07324	0.0381501	0.601694	CA-CN
Dusp10	38.5719	-0.390574	0.188249	-2.07477	0.0380078	0.601694	CA-CN
Ccdc82	170.364	-0.289313	0.138937	-2.08232	0.0373128	0.601694	CA-CN
Galk1	20.2646	0.400244	0.193254	2.07108	0.0383511	0.601694	CA-CN
Lrrk2	430.521	-0.386764	0.186052	-2.0788	0.0376361	0.601694	CA-CN
Rapgef6	329.94	-0.349326	0.166857	-2.09357	0.0362984	0.601694	CA-CN
Lair1	1767.03	-0.21607	0.104409	-2.06947	0.0385023	0.601694	CA-CN
Trip11	105.407	-0.40423	0.193997	-2.08369	0.0371884	0.601694	CA-CN
Ppt1	1027.06	0.210358	0.100855	2.08575	0.037001	0.601694	CA-CN
Sppl2b	113.999	0.320359	0.153253	2.09039	0.0365831	0.601694	CA-CN
Clpb	45.0719	0.357275	0.172354	2.07292	0.0381798	0.601694	CA-CN
Arpp19	214.445	0.281228	0.135582	2.07422	0.0380588	0.601694	CA-CN
Atpaf2	81.4609	0.352805	0.170234	2.07247	0.0382212	0.601694	CA-CN
Tgfbr1	1628.25	-0.336025	0.162398	-2.06915	0.0385324	0.601694	CA-CN
Srcap	869.483	-0.3295	0.158648	-2.07693	0.0378081	0.601694	CA-CN
Spcs2	367.583	0.282346	0.136377	2.07033	0.038421	0.601694	CA-CN
Rdm1	41.8478	0.383139	0.183227	2.09106	0.0365227	0.601694	CA-CN
Dstn	283.627	0.269035	0.12883	2.08829	0.0367718	0.601694	CA-CN
Cryl1	85.1846	0.32348	0.155615	2.07872	0.0376427	0.601694	CA-CN
Tfb1m	25.7019	-0.402021	0.194159	-2.07057	0.038399	0.601694	CA-CN
1700018L02Rik	8.35876	-0.38598	0.184809	-2.08853	0.0367498	0.601694	CA-CN
Esco1	124.384	-0.381565	0.183662	-2.07754	0.0377514	0.601694	CA-CN
Serpina3g	32.8023	-0.384655	0.184248	-2.08771	0.0368243	0.601694	CA-CN
Aff4	321.414	-0.365717	0.174876	-2.09129	0.0365022	0.601694	CA-CN
Zfp566	11.6122	-0.393005	0.189577	-2.07306	0.0381665	0.601694	CA-CN
Dzip3	27.5427	-0.399923	0.19279	-2.07439	0.0380428	0.601694	CA-CN
Rc3h1	526.901	-0.371537	0.179538	-2.0694	0.0385084	0.601694	CA-CN
Edem2	272.066	0.261049	0.126023	2.07143	0.0383183	0.601694	CA-CN
Csnk1g2	453.79	0.227694	0.109702	2.07557	0.0379342	0.601694	CA-CN
Zfp182	119.542	-0.364829	0.17579	-2.07537	0.0379525	0.601694	CA-CN
Ampd3	467.163	-0.282259	0.135335	-2.08563	0.0370118	0.601694	CA-CN
Lpp	162.243	-0.389272	0.187845	-2.0723	0.0382372	0.601694	CA-CN
Cdt1	89.3088	0.318996	0.153184	2.08244	0.037302	0.601694	CA-CN
Pfdn4	52.4827	0.363418	0.175714	2.06824	0.0386178	0.602071	CA-CN
Maf	34.2645	-0.378254	0.187227	-2.02029	0.0433533	0.60556	CA-CN
Fam208a	371.468	-0.354145	0.173334	-2.04314	0.0410385	0.60556	CA-CN
Ankrd52	413.444	-0.365555	0.179521	-2.03628	0.0417219	0.60556	CA-CN
Zfp619	37.2568	-0.395828	0.193949	-2.04089	0.0412618	0.60556	CA-CN
Nhp2	73.5181	0.36397	0.180305	2.01863	0.0435252	0.60556	CA-CN
Snx5	563.273	0.265272	0.129813	2.04349	0.0410044	0.60556	CA-CN
Pank3	394.668	-0.349294	0.173087	-2.01802	0.043589	0.60556	CA-CN
Clec2g	16.801	-0.38727	0.189406	-2.04466	0.0408886	0.60556	CA-CN
Vps13d	498.937	-0.357823	0.174933	-2.04548	0.0408076	0.60556	CA-CN
Ankfy1	840.595	-0.333774	0.164547	-2.02845	0.0425147	0.60556	CA-CN
Nup43	28.9709	0.389085	0.191825	2.02833	0.0425269	0.60556	CA-CN
Rbm6	255.633	-0.272829	0.135183	-2.01822	0.043568	0.60556	CA-CN
Traf3	706.46	-0.279538	0.138279	-2.02155	0.0432227	0.60556	CA-CN
Pdp1	27.0828	-0.393184	0.191931	-2.04857	0.0405041	0.60556	CA-CN
Taf1	211.917	-0.36989	0.181588	-2.03697	0.0416528	0.60556	CA-CN
Ago3	62.8396	-0.387713	0.191569	-2.02388	0.0429826	0.60556	CA-CN
Mef2a	1689.66	-0.308299	0.150783	-2.04465	0.0408895	0.60556	CA-CN
Braf	277.843	-0.360073	0.178215	-2.02044	0.0433376	0.60556	CA-CN
Msantd2	67.5433	-0.332055	0.16231	-2.04581	0.0407753	0.60556	CA-CN
2210016L21Rik	64.5122	0.362189	0.179366	2.01927	0.0434595	0.60556	CA-CN
Rtp4	174.168	0.376229	0.184384	2.04047	0.0413034	0.60556	CA-CN
Rictor	238.747	-0.377251	0.183198	-2.05926	0.0394697	0.60556	CA-CN
Tmem170b	278.366	-0.373881	0.183377	-2.03887	0.0414628	0.60556	CA-CN
Herc2	474.79	-0.340499	0.166017	-2.05099	0.040268	0.60556	CA-CN
Slc39a6	88.5699	-0.339655	0.167332	-2.02982	0.0423746	0.60556	CA-CN
Ccdc94	33.1382	0.379678	0.186298	2.03801	0.0415486	0.60556	CA-CN
Azin2	66.2032	0.370361	0.183125	2.02245	0.0431297	0.60556	CA-CN
Dpm3	43.2287	0.389732	0.189501	2.05662	0.0397226	0.60556	CA-CN
Thap6	102.057	-0.314559	0.153362	-2.05109	0.0402582	0.60556	CA-CN
Pdia4	172.327	0.289461	0.142536	2.0308	0.0422757	0.60556	CA-CN
Coasy	75.3579	0.322741	0.156488	2.0624	0.0391696	0.60556	CA-CN
A230020J21Rik	23.0794	-0.393628	0.192085	-2.04923	0.0404391	0.60556	CA-CN
C920009B18Rik	70.6822	-0.394264	0.193871	-2.03365	0.0419873	0.60556	CA-CN
Cramp1l	234.711	-0.320519	0.157202	-2.03891	0.0414595	0.60556	CA-CN
Gadd45b	58.1658	0.340857	0.166546	2.04662	0.0406949	0.60556	CA-CN
Xkr8	71.7263	-0.375996	0.183098	-2.05352	0.0400221	0.60556	CA-CN
Baz2b	362.353	-0.332345	0.163149	-2.03706	0.0416442	0.60556	CA-CN
Ubr4	1176.71	-0.325533	0.161099	-2.0207	0.0433108	0.60556	CA-CN
Ikzf3	495.849	-0.253942	0.124333	-2.04244	0.0411081	0.60556	CA-CN
Card14	100.494	0.318717	0.154488	2.06306	0.0391073	0.60556	CA-CN
Nlrc4	217.595	-0.333666	0.164178	-2.03235	0.0421183	0.60556	CA-CN
Hnrnpa0	541.481	0.274238	0.134695	2.03598	0.0417519	0.60556	CA-CN
Tap1	1247.15	-0.330225	0.161038	-2.05061	0.0403053	0.60556	CA-CN
Isoc1	302.153	-0.321653	0.156847	-2.05074	0.0402922	0.60556	CA-CN
Spen	864.561	-0.330293	0.162557	-2.03185	0.0421686	0.60556	CA-CN
Slc6a12	51.5248	-0.386155	0.190573	-2.02628	0.0427358	0.60556	CA-CN
Spop	968.884	0.202117	0.099067	2.0402	0.0413302	0.60556	CA-CN
Cd93	58.3524	-0.381723	0.18902	-2.01948	0.0434374	0.60556	CA-CN
Mospd1	39.0708	-0.376591	0.183518	-2.05206	0.0401637	0.60556	CA-CN
Ddx41	265.486	0.270411	0.131389	2.0581	0.0395808	0.60556	CA-CN
Cd300ld	3353.47	-0.251583	0.124604	-2.01906	0.0434815	0.60556	CA-CN
Btbd2	135.586	0.282847	0.139284	2.03073	0.0422829	0.60556	CA-CN
Poc1b	73.1641	0.328362	0.161921	2.02791	0.0425691	0.60556	CA-CN
Spred2	150.765	-0.381873	0.18827	-2.02833	0.0425264	0.60556	CA-CN
Dnajc28	18.0858	-0.383441	0.188151	-2.03794	0.0415561	0.60556	CA-CN
Impact	156.045	-0.317001	0.154352	-2.05375	0.0399996	0.60556	CA-CN
Dnajc13	397.858	-0.338892	0.164199	-2.06392	0.0390257	0.60556	CA-CN
Snapc2	45.775	0.378084	0.183801	2.05702	0.0396838	0.60556	CA-CN
Pou2f1	172.508	-0.354906	0.173619	-2.04417	0.0409372	0.60556	CA-CN
LOC105246506	92.4566	0.380285	0.184311	2.06328	0.039086	0.60556	CA-CN
Dock7	208.856	-0.316927	0.154871	-2.0464	0.0407175	0.60556	CA-CN
Iscu	143.283	0.296242	0.146222	2.02598	0.0427673	0.60556	CA-CN
Dnajc18	56.9296	-0.369103	0.17981	-2.05274	0.0400978	0.60556	CA-CN
Mier3	132.751	-0.31879	0.157734	-2.02106	0.0432733	0.60556	CA-CN
Mycbp2	1352.49	-0.227281	0.112123	-2.02706	0.042656	0.60556	CA-CN
Mvb12a	97.9059	0.340221	0.167876	2.02662	0.042701	0.60556	CA-CN
Tmem160	70.1608	0.379541	0.186004	2.0405	0.0413001	0.60556	CA-CN
Ctsb	16985.9	0.222164	0.109652	2.02609	0.0427557	0.60556	CA-CN
Arid5b	62.7662	-0.396149	0.193662	-2.04557	0.0407987	0.60556	CA-CN
Ptprj	3121.84	-0.372729	0.182514	-2.04219	0.0411324	0.60556	CA-CN
Zfp760	72.956	-0.386306	0.18803	-2.05449	0.0399287	0.60556	CA-CN
Isca1	47.2388	0.357821	0.175472	2.03919	0.0414308	0.60556	CA-CN
Bola2	94.0825	0.363071	0.178108	2.03849	0.0415013	0.60556	CA-CN
Churc1	35.7927	0.37117	0.183913	2.01818	0.0435722	0.60556	CA-CN
Ctbp1	659.024	0.216736	0.105399	2.05633	0.0397508	0.60556	CA-CN
Ifrd2	42.9287	0.358993	0.176896	2.0294	0.0424177	0.60556	CA-CN
Nufip1	75.959	0.339279	0.164732	2.05958	0.0394389	0.60556	CA-CN
Hnrnpf	225.108	0.286623	0.142779	2.00746	0.0447011	0.608464	CA-CN
Ttll4	63.4871	-0.390528	0.194004	-2.01299	0.044116	0.608464	CA-CN
Rab4b	226.227	0.29115	0.145175	2.00551	0.044909	0.608464	CA-CN
Sil1	55.9236	0.351595	0.175027	2.0088	0.0445584	0.608464	CA-CN
Strn	116.426	-0.390012	0.194017	-2.01019	0.0444106	0.608464	CA-CN
Kctd21	75.1675	-0.326977	0.162382	-2.01363	0.0440479	0.608464	CA-CN
Psmd9	78.5059	0.310062	0.154515	2.00668	0.0447843	0.608464	CA-CN
Bivm	40.3126	-0.360284	0.179327	-2.00909	0.0445276	0.608464	CA-CN
Mrps15	100.851	0.364837	0.181837	2.00639	0.0448142	0.608464	CA-CN
Mrpl39	57.0002	0.343631	0.170788	2.01203	0.0442164	0.608464	CA-CN
Acsl4	337.914	-0.338484	0.168666	-2.00682	0.0447685	0.608464	CA-CN
Ppfibp1	56.1153	-0.364749	0.18164	-2.00808	0.0446344	0.608464	CA-CN
Tiparp	185.814	-0.322012	0.160567	-2.00547	0.0449131	0.608464	CA-CN
Rogdi	157.551	0.358008	0.178497	2.00568	0.0448907	0.608464	CA-CN
Mfsd7a	14.291	-0.38604	0.191595	-2.01488	0.0439175	0.608464	CA-CN
Aars2	40.2647	0.370747	0.184475	2.00974	0.0444587	0.608464	CA-CN
Sumo3	296.018	0.26776	0.133088	2.0119	0.0442307	0.608464	CA-CN
Tas2r135	3.07178	-0.286504	0.142263	-2.01389	0.0440206	0.608464	CA-CN
Rps14	1007.39	0.315686	0.15752	2.00411	0.0450587	0.609596	CA-CN
Tnrc6a	953.204	-0.240896	0.12028	-2.0028	0.0451987	0.60981	CA-CN
Prmt1	180.761	0.327203	0.163363	2.00292	0.0451857	0.60981	CA-CN
Zbtb44	247.092	-0.351041	0.175503	-2.0002	0.0454785	0.612744	CA-CN
5430437J10Rik	170.518	-0.303259	0.151745	-1.99848	0.0456649	0.614412	CA-CN
Rhbdl1	6.34856	-0.353398	0.176953	-1.99713	0.0458109	0.615533	CA-CN
Ralgapb	450.747	-0.336077	0.168362	-1.99616	0.0459169	0.616115	CA-CN
Nop10	148.092	0.291571	0.146186	1.99451	0.046096	0.617674	CA-CN
Bnip1	46.7472	0.37767	0.189553	1.99242	0.0463248	0.617963	CA-CN
Rplp0	1140.77	0.273875	0.137486	1.99202	0.0463692	0.617963	CA-CN
Zfyve9	1486.66	-0.293844	0.147432	-1.99309	0.0462515	0.617963	CA-CN
Zfc3h1	444.289	-0.313542	0.157354	-1.99259	0.046306	0.617963	CA-CN
Yod1	46.7676	-0.386673	0.194172	-1.99139	0.0464383	0.618045	CA-CN
Fancg	82.5841	-0.310438	0.15594	-1.99075	0.0465082	0.618137	CA-CN
Cebpd	131.809	0.361711	0.181967	1.98778	0.0468359	0.619804	CA-CN
Rps3	1718.65	0.274662	0.138564	1.9822	0.0474566	0.619804	CA-CN
Fkbpl	43.92	0.368273	0.185625	1.98396	0.0472599	0.619804	CA-CN
Coq10b	120.616	-0.293359	0.14803	-1.98175	0.0475068	0.619804	CA-CN
Txndc12	219.788	0.25578	0.128982	1.98306	0.0473606	0.619804	CA-CN
Slc20a2	83.5806	-0.316439	0.159519	-1.98371	0.0472887	0.619804	CA-CN
Lcor	24.0196	-0.362551	0.182339	-1.98834	0.0467743	0.619804	CA-CN
Mkl2	63.4893	-0.37	0.186712	-1.98166	0.047517	0.619804	CA-CN
Kif21b	1793.75	-0.270556	0.136066	-1.98842	0.0467657	0.619804	CA-CN
Pcf11	333.367	-0.2797	0.141087	-1.98247	0.0474264	0.619804	CA-CN
Taok1	828.889	-0.360721	0.181974	-1.98226	0.0474502	0.619804	CA-CN
Rnf214	79.8655	-0.356089	0.179594	-1.98275	0.0473959	0.619804	CA-CN
Pikfyve	357.564	-0.331931	0.16736	-1.98333	0.0473304	0.619804	CA-CN
Apc	272.083	-0.373069	0.187803	-1.9865	0.046978	0.619804	CA-CN
Syf2	416.143	0.287901	0.145351	1.98073	0.0476212	0.620338	CA-CN
Trmt1l	187.804	-0.295657	0.151388	-1.95298	0.0508222	0.624088	CA-CN
Ptprc	8719.05	-0.292242	0.148167	-1.97239	0.0485655	0.624088	CA-CN
Asb14	15.7994	-0.378162	0.193439	-1.95495	0.0505893	0.624088	CA-CN
Aqp9	67.9704	-0.320824	0.163055	-1.96758	0.0491165	0.624088	CA-CN
Phkb	79.9682	-0.305277	0.155482	-1.96342	0.0495971	0.624088	CA-CN
1700020I14Rik	129.942	-0.354943	0.181562	-1.95494	0.0505903	0.624088	CA-CN
Gapvd1	333.688	-0.298663	0.152606	-1.95709	0.050337	0.624088	CA-CN
Nfkbiz	1168.46	-0.247794	0.1269	-1.95268	0.050858	0.624088	CA-CN
Cd300ld3	2.88064	-0.284532	0.144024	-1.97558	0.0482019	0.624088	CA-CN
Letm2	24.6599	0.375187	0.19086	1.96577	0.0493249	0.624088	CA-CN
Lyst	511.763	-0.366551	0.187413	-1.95584	0.0504837	0.624088	CA-CN
Ireb2	323.549	-0.311784	0.158425	-1.96803	0.049065	0.624088	CA-CN
Noc2l	215.659	0.291428	0.147863	1.97093	0.0487322	0.624088	CA-CN
Atp2b4	237.152	-0.340468	0.174232	-1.95411	0.0506887	0.624088	CA-CN
Ncor2	1708.88	-0.282449	0.143439	-1.96913	0.0489386	0.624088	CA-CN
Ssfa2	350.852	-0.304558	0.154154	-1.97567	0.0481922	0.624088	CA-CN
Parp14	1147.95	-0.331766	0.169152	-1.96135	0.0498381	0.624088	CA-CN
Atp6v1d	178.381	0.276343	0.140802	1.96263	0.0496891	0.624088	CA-CN
Cox7a2l	350.434	0.314206	0.160887	1.95296	0.0508241	0.624088	CA-CN
Spag9	694.354	-0.327543	0.167183	-1.95919	0.0500903	0.624088	CA-CN
Acvr2a	56.3986	-0.3505	0.177787	-1.97146	0.0486712	0.624088	CA-CN
Hras	74.0899	0.340944	0.174699	1.95161	0.0509847	0.624088	CA-CN
Csf1	26.5716	-0.379821	0.194124	-1.9566	0.050395	0.624088	CA-CN
Scai	49.6044	-0.379099	0.194103	-1.95308	0.0508103	0.624088	CA-CN
Lrrc8a	104.367	-0.306843	0.156309	-1.96305	0.0496398	0.624088	CA-CN
Zmiz1	2207.82	-0.299264	0.152379	-1.96394	0.0495368	0.624088	CA-CN
Otud4	422.985	-0.325427	0.165899	-1.9616	0.049809	0.624088	CA-CN
Rpl18a	62.3995	0.372058	0.190501	1.95305	0.0508135	0.624088	CA-CN
Abhd2	189.59	-0.378937	0.193784	-1.95546	0.0505285	0.624088	CA-CN
Fam210a	93.9441	-0.364238	0.185062	-1.9682	0.0490451	0.624088	CA-CN
Vcl	547.729	-0.318571	0.162092	-1.96537	0.0493716	0.624088	CA-CN
Pelp1	101.904	0.299861	0.153322	1.95577	0.0504925	0.624088	CA-CN
2810428I15Rik	71.0999	0.356644	0.181862	1.96107	0.0498707	0.624088	CA-CN
Spryd3	179.516	0.287034	0.145907	1.96723	0.0491564	0.624088	CA-CN
Gm15787	34.3898	0.359079	0.183535	1.95646	0.0504115	0.624088	CA-CN
Rfc4	30.3554	0.377084	0.193202	1.95176	0.050967	0.624088	CA-CN
Ocrl	118.418	-0.316275	0.160383	-1.972	0.0486099	0.624088	CA-CN
Atp11c	227.455	-0.345231	0.17506	-1.97207	0.0486017	0.624088	CA-CN
Phax	108.219	0.29555	0.151168	1.95511	0.0505702	0.624088	CA-CN
Hmgcs1	203.648	-0.294565	0.149252	-1.97361	0.0484259	0.624088	CA-CN
Gpn3	53.0109	0.351157	0.177922	1.97366	0.0484208	0.624088	CA-CN
3300002I08Rik	2.61158	-0.230154	0.116509	-1.97542	0.0482211	0.624088	CA-CN
Rbm3	95.4586	-0.347431	0.178052	-1.95129	0.0510225	0.624088	CA-CN
D330041H03Rik	237.144	0.335032	0.171382	1.95488	0.050597	0.624088	CA-CN
Tpr	1004.62	-0.332429	0.169898	-1.95664	0.0503893	0.624088	CA-CN
C230091D08Rik	92.9524	-0.382722	0.194143	-1.97134	0.0486847	0.624088	CA-CN
Zfp169	63.8509	-0.378707	0.193775	-1.95437	0.0506578	0.624088	CA-CN
Rpl14-ps1	356.388	0.313989	0.158926	1.97569	0.0481898	0.624088	CA-CN
Minos1	129.378	0.342066	0.174562	1.95957	0.0500459	0.624088	CA-CN
Dnal4	58.657	0.325985	0.167185	1.94985	0.0511941	0.625409	CA-CN
Atp5l	3.44721	0.283218	0.145483	1.94675	0.051565	0.629157	CA-CN
Plxnc1	212.656	-0.341328	0.175562	-1.94421	0.0518707	0.629201	CA-CN
Cenpb	255.717	0.302586	0.155664	1.94384	0.0519149	0.629201	CA-CN
Mpc2	160.08	0.316158	0.162731	1.94283	0.0520372	0.629201	CA-CN
Rttn	49.5871	-0.341548	0.175789	-1.94295	0.0520227	0.629201	CA-CN
Themis2	2404.12	-0.256877	0.132131	-1.94411	0.0518826	0.629201	CA-CN
Zfp788	38.7684	-0.363805	0.187251	-1.94287	0.0520314	0.629201	CA-CN
Atf3	121.358	-0.340752	0.175423	-1.94246	0.0520811	0.629201	CA-CN
Lrrfip1	1699.46	-0.271754	0.139759	-1.94445	0.0518415	0.629201	CA-CN
Chek2	45.4579	-0.373546	0.192433	-1.94117	0.0522372	0.62995	CA-CN
Atf7	473.348	-0.351913	0.181315	-1.94089	0.0522713	0.62995	CA-CN
Creb1	413.118	-0.288436	0.148658	-1.94026	0.0523482	0.630103	CA-CN
Ankrd12	170.623	-0.358801	0.184986	-1.93961	0.0524271	0.63028	CA-CN
Ndufb7	193.978	0.345469	0.178199	1.93867	0.0525415	0.630289	CA-CN
Park7	180.853	0.302602	0.156116	1.93831	0.0525854	0.630289	CA-CN
Junb	764.417	0.289386	0.149323	1.93799	0.0526242	0.630289	CA-CN
Zbtb16	339.444	-0.357494	0.184513	-1.9375	0.0526845	0.630289	CA-CN
Adrb1	160.473	0.266061	0.137373	1.93677	0.0527733	0.630583	CA-CN
Hacd3	101.956	0.330793	0.170852	1.93613	0.0528513	0.630747	CA-CN
Znhit2	65.0206	0.349503	0.180604	1.93519	0.0529665	0.630775	CA-CN
Srp9	110.344	0.331853	0.171494	1.93507	0.052982	0.630775	CA-CN
Notch2	4403.19	-0.319202	0.16505	-1.93397	0.0531169	0.631615	CA-CN
Tmem50a	894.831	0.241902	0.125549	1.92675	0.0540109	0.632264	CA-CN
Tmem184c	112.727	-0.280173	0.145393	-1.927	0.0539795	0.632264	CA-CN
Rpl34	312.371	0.346013	0.179097	1.93199	0.0533611	0.632264	CA-CN
Slc30a7	362.627	-0.303656	0.15718	-1.9319	0.0533714	0.632264	CA-CN
Rif1	93.7697	-0.362701	0.187893	-1.93036	0.0535627	0.632264	CA-CN
Pira6	298.154	-0.341558	0.176868	-1.93115	0.0534651	0.632264	CA-CN
Ccdc39	49.5644	-0.373767	0.194055	-1.92609	0.0540933	0.632264	CA-CN
Tysnd1	99.0904	0.342678	0.177748	1.92788	0.0538697	0.632264	CA-CN
Evi5	182.358	-0.281447	0.14608	-1.92666	0.0540218	0.632264	CA-CN
Atp5e	354.045	0.359396	0.186345	1.92865	0.0537738	0.632264	CA-CN
Tbc1d7	9.82874	0.35403	0.18381	1.92606	0.0540968	0.632264	CA-CN
Rasa2	90.1744	-0.352446	0.183019	-1.92574	0.0541371	0.632264	CA-CN
Gatad2b	116.28	-0.354309	0.183953	-1.92609	0.0540937	0.632264	CA-CN
Hpse	312.757	-0.249159	0.129202	-1.92844	0.0538005	0.632264	CA-CN
Cks2	26.932	-0.363858	0.188542	-1.92985	0.0536249	0.632264	CA-CN
Mfsd5	419.288	0.272974	0.141833	1.92462	0.0542764	0.633138	CA-CN
Shprh	160.65	-0.349859	0.181878	-1.92359	0.0544062	0.6339	CA-CN
Il31ra	250.826	-0.336991	0.175333	-1.92201	0.0546049	0.634228	CA-CN
Inpp5d	1816.35	-0.212015	0.11032	-1.92182	0.054628	0.634228	CA-CN
Nbr1	363.405	-0.287082	0.149337	-1.92238	0.0545584	0.634228	CA-CN
Ganc	180.967	-0.301528	0.156995	-1.92063	0.054779	0.635229	CA-CN
Cic	1566.18	-0.249223	0.129812	-1.91988	0.0548728	0.635567	CA-CN
Luc7l	226.223	-0.27829	0.14519	-1.91673	0.0552718	0.636281	CA-CN
Sdc1	26.4393	0.370869	0.193461	1.91702	0.0552354	0.636281	CA-CN
Xntrpc	34.3497	-0.36897	0.19241	-1.91762	0.0551586	0.636281	CA-CN
Zbtb37	25.1432	-0.350629	0.182937	-1.91667	0.0552802	0.636281	CA-CN
Gm21948	46.9843	0.358193	0.186916	1.91633	0.0553232	0.636281	CA-CN
9330175E14Rik	20.4261	-0.367492	0.191688	-1.91713	0.0552213	0.636281	CA-CN
Ormdl3	67.9777	0.3018	0.157626	1.91466	0.0555355	0.637231	CA-CN
Gpat4	230.887	0.233334	0.121853	1.91487	0.0555086	0.637231	CA-CN
Srf	373.538	0.270292	0.141699	1.9075	0.0564555	0.637824	CA-CN
4632428C04Rik	78.7442	-0.309904	0.162026	-1.91268	0.0557889	0.637824	CA-CN
Tsga10	18.2366	-0.36687	0.192112	-1.90967	0.0561754	0.637824	CA-CN
Atp6v0e	633.376	0.270572	0.141849	1.90747	0.0564599	0.637824	CA-CN
Tmem140	93.4807	-0.334343	0.175287	-1.90741	0.0564677	0.637824	CA-CN
Mllt11	42.6977	-0.347372	0.181901	-1.90967	0.0561751	0.637824	CA-CN
Rpl6	306.257	0.307282	0.160976	1.90887	0.0562791	0.637824	CA-CN
Cnn2	1983.38	0.238646	0.125163	1.90669	0.0565612	0.637824	CA-CN
Pds5a	262.45	-0.368711	0.192999	-1.91043	0.0560784	0.637824	CA-CN
Atf7ip	423.939	-0.337483	0.176797	-1.90887	0.0562786	0.637824	CA-CN
Smc2	56.3982	-0.342938	0.1798	-1.90732	0.0564787	0.637824	CA-CN
Dgat2	101.592	0.329591	0.172455	1.91117	0.0559824	0.637824	CA-CN
Scand1	253.838	0.352893	0.185077	1.90673	0.0565551	0.637824	CA-CN
Tmem109	519.319	0.224993	0.1178	1.90995	0.0561399	0.637824	CA-CN
Rp2	542.202	-0.278933	0.145757	-1.91369	0.05566	0.637824	CA-CN
Zfp518a	114.536	-0.352416	0.185126	-1.90365	0.0569552	0.639306	CA-CN
Msr1	91.9564	-0.324135	0.170206	-1.90437	0.0568626	0.639306	CA-CN
Plin3	160.515	0.272526	0.143161	1.90364	0.0569569	0.639306	CA-CN
Pim3	45.3976	0.343555	0.180517	1.90317	0.0570181	0.639306	CA-CN
Coro7	372.725	-0.248751	0.130605	-1.90461	0.0568303	0.639306	CA-CN
BC051226	19.0681	0.358236	0.188716	1.89828	0.0576586	0.639699	CA-CN
Ranbp6	113.007	-0.30775	0.162247	-1.8968	0.0578547	0.639699	CA-CN
Camk1d	807.795	-0.333243	0.175719	-1.89646	0.0578998	0.639699	CA-CN
Gpx1	8178.51	0.322942	0.170087	1.89868	0.0576062	0.639699	CA-CN
Zfp607a	50.128	-0.359474	0.189176	-1.90021	0.057406	0.639699	CA-CN
Zbtb11	126.68	-0.339972	0.179079	-1.89845	0.0576369	0.639699	CA-CN
Egln2	213.693	0.256186	0.135032	1.89723	0.0577982	0.639699	CA-CN
B9d2	110.528	0.316558	0.166827	1.89752	0.057759	0.639699	CA-CN
Dennd4b	892.403	-0.199209	0.1049	-1.89904	0.0575589	0.639699	CA-CN
Srebf2	1294.15	-0.249611	0.131512	-1.898	0.0576955	0.639699	CA-CN
Krcc1	180.964	-0.292825	0.154381	-1.89677	0.0578584	0.639699	CA-CN
Rpl34-ps1	307.185	0.342134	0.180307	1.89751	0.0577609	0.639699	CA-CN
Tnrc18	827.184	-0.278191	0.146593	-1.89771	0.0577349	0.639699	CA-CN
Igtp	291.262	-0.363321	0.191796	-1.89431	0.0581844	0.642121	CA-CN
Ap5s1	38.2837	0.352648	0.186538	1.89049	0.0586926	0.645187	CA-CN
Diaph2	404.559	-0.329718	0.174558	-1.88887	0.058909	0.645187	CA-CN
Prr14l	277.236	-0.326566	0.172871	-1.88908	0.0588815	0.645187	CA-CN
Tnf	258.024	-0.298205	0.157896	-1.88862	0.0589429	0.645187	CA-CN
Rexo2	122.189	0.313903	0.166015	1.89081	0.0586497	0.645187	CA-CN
Suco	156.417	-0.303283	0.160613	-1.88828	0.0589878	0.645187	CA-CN
Eif4a3	260.721	0.268335	0.142077	1.88866	0.0589377	0.645187	CA-CN
Tpst2	307.64	0.253596	0.134176	1.89002	0.0587551	0.645187	CA-CN
Alas1	137.286	0.278717	0.147733	1.88663	0.0592099	0.646177	CA-CN
Polr2e	286.964	0.302712	0.160422	1.88698	0.0591634	0.646177	CA-CN
Dctn3	154.957	0.298654	0.158436	1.88501	0.0594282	0.646405	CA-CN
Pofut1	331.532	-0.269365	0.142837	-1.88582	0.0593193	0.646405	CA-CN
Tmem67	32.9046	-0.350135	0.18574	-1.88508	0.0594196	0.646405	CA-CN
Uprt	8.22666	-0.298621	0.15856	-1.88333	0.059656	0.648165	CA-CN
Eif4a1	280.965	0.295805	0.15721	1.88159	0.0598912	0.648896	CA-CN
Myd88	850.037	0.194845	0.103565	1.88137	0.0599214	0.648896	CA-CN
Mbnl1	1767.8	-0.291723	0.155019	-1.88186	0.0598556	0.648896	CA-CN
Sod1	195.36	0.334922	0.178343	1.87796	0.0603861	0.651057	CA-CN
Zfp687	153.437	-0.31329	0.166807	-1.87816	0.0603593	0.651057	CA-CN
Trp53bp1	227.181	-0.23548	0.125389	-1.87801	0.0603804	0.651057	CA-CN
LOC106740	14.4376	-0.361864	0.192556	-1.87927	0.060208	0.651057	CA-CN
Ccdc186	36.3209	-0.359189	0.191751	-1.8732	0.0610402	0.656537	CA-CN
Lrwd1	200.755	0.245388	0.131022	1.87288	0.0610852	0.656537	CA-CN
Rab8a	926.831	0.221637	0.118345	1.87281	0.0610949	0.656537	CA-CN
Mob3b	335.134	-0.256739	0.137191	-1.8714	0.0612897	0.657909	CA-CN
Tcea3	96.6368	0.315571	0.168768	1.86986	0.0615035	0.658765	CA-CN
Hira	148.516	0.255687	0.136718	1.87018	0.0614585	0.658765	CA-CN
Elf4	2088.96	-0.255736	0.136869	-1.86848	0.0616957	0.659486	CA-CN
Amdhd2	49.6332	0.331793	0.177581	1.86841	0.0617051	0.659486	CA-CN
Zfp61	28.2722	0.362559	0.194108	1.86783	0.0617864	0.659637	CA-CN
Dennd1b	136.517	-0.336106	0.180027	-1.86698	0.0619047	0.660182	CA-CN
Xpo4	49.0101	-0.355719	0.190745	-1.86489	0.0621962	0.660218	CA-CN
H2afj	266.249	0.294292	0.158411	1.85777	0.0632011	0.660218	CA-CN
Ncor1	1577.34	-0.2106	0.1133	-1.85879	0.0630574	0.660218	CA-CN
Aftph	668.141	-0.193111	0.103652	-1.86307	0.062452	0.660218	CA-CN
Zgpat	123.271	-0.335938	0.180756	-1.85851	0.0630968	0.660218	CA-CN
Srm	33.931	0.347421	0.187016	1.8577	0.0632113	0.660218	CA-CN
Cep104	49.3097	-0.352142	0.189227	-1.86095	0.0627508	0.660218	CA-CN
Ccdc6	146.51	-0.278603	0.14958	-1.86257	0.0625233	0.660218	CA-CN
Tmed2	108.204	0.303524	0.163382	1.85775	0.0632042	0.660218	CA-CN
Tmem110	118.013	0.265195	0.142255	1.86422	0.0622901	0.660218	CA-CN
Sppl2a	1317	-0.292613	0.156886	-1.86513	0.0621632	0.660218	CA-CN
Usp12	409.53	-0.340844	0.182903	-1.86352	0.0623889	0.660218	CA-CN
Klf3	653.756	-0.350818	0.188768	-1.85846	0.063104	0.660218	CA-CN
Nap1l4	443.526	0.20187	0.108353	1.86307	0.062452	0.660218	CA-CN
Lmo2	329.721	0.226681	0.121979	1.85836	0.063118	0.660218	CA-CN
Fasn	194.845	-0.244723	0.13149	-1.86115	0.0627225	0.660218	CA-CN
Txlng	44.9206	-0.358725	0.192422	-1.86426	0.0622855	0.660218	CA-CN
Il3ra	69.6755	0.34326	0.184805	1.85741	0.0632524	0.660218	CA-CN
Rprd1a	29.5104	-0.360511	0.193195	-1.86605	0.0620349	0.660218	CA-CN
Gtf2f2	84.5417	0.290165	0.1562	1.85765	0.0632187	0.660218	CA-CN
Pnpo	128.974	0.263336	0.141827	1.85675	0.0633472	0.660506	CA-CN
Rpph1	18.8152	0.23746	0.127946	1.85593	0.063463	0.660523	CA-CN
Osgep	84.9712	0.293048	0.15791	1.85579	0.0634834	0.660523	CA-CN
Plekhg3	623.068	-0.194705	0.104965	-1.85494	0.0636047	0.661085	CA-CN
Ube2j2	110.082	0.302821	0.163909	1.84749	0.0646755	0.663422	CA-CN
9030404E10Rik	19.0911	-0.356783	0.192666	-1.85182	0.0640518	0.663422	CA-CN
Cul5	122.884	-0.27671	0.149532	-1.85051	0.0642406	0.663422	CA-CN
Csnk2a2	118.564	-0.275504	0.149027	-1.84868	0.0645035	0.663422	CA-CN
Polr3gl	44.9869	0.338916	0.183325	1.84871	0.0644995	0.663422	CA-CN
Tnfsf10	24.5361	-0.359594	0.194152	-1.85213	0.0640076	0.663422	CA-CN
Cd244	1127.31	-0.312985	0.169346	-1.8482	0.0645735	0.663422	CA-CN
Aff1	288.239	-0.34279	0.185523	-1.84769	0.0646466	0.663422	CA-CN
Tug1	572.736	-0.318748	0.17235	-1.84943	0.0643963	0.663422	CA-CN
Kidins220	493.216	-0.284449	0.153524	-1.8528	0.063911	0.663422	CA-CN
Pbrm1	450.515	-0.268587	0.145355	-1.8478	0.0646317	0.663422	CA-CN
2610507B11Rik	864.597	-0.309791	0.167511	-1.84938	0.0644035	0.663422	CA-CN
Pla2g16	40.1728	-0.353764	0.191506	-1.84727	0.0647076	0.663422	CA-CN
Sf3b2	1087.4	0.205103	0.111209	1.84431	0.0651386	0.663703	CA-CN
Itgal	17892.6	-0.246118	0.133462	-1.8441	0.0651682	0.663703	CA-CN
Arhgap11a	247.672	-0.284889	0.154346	-1.84578	0.0649237	0.663703	CA-CN
Med12	510.508	-0.305694	0.165905	-1.84258	0.0653904	0.663703	CA-CN
Trim23	30.7083	-0.356577	0.193284	-1.84484	0.0650614	0.663703	CA-CN
Cep192	146.502	-0.333495	0.181046	-1.84204	0.0654694	0.663703	CA-CN
Mrpl33	217.957	0.314208	0.170515	1.84271	0.0653721	0.663703	CA-CN
2001-03-01	694.393	-0.278964	0.151136	-1.84579	0.064923	0.663703	CA-CN
Hnrnpab	827.278	0.20873	0.113151	1.8447	0.0650811	0.663703	CA-CN
Parl	302.54	0.283853	0.154056	1.84253	0.065397	0.663703	CA-CN
Trem2	46.3876	0.357573	0.194125	1.84198	0.0654784	0.663703	CA-CN
Nfkbia	1607.1	0.266958	0.144986	1.84126	0.0655835	0.664052	CA-CN
Adamts10	316.736	-0.233958	0.127095	-1.84082	0.0656479	0.664052	CA-CN
Esyt2	235.525	-0.325798	0.177058	-1.84007	0.0657583	0.664484	CA-CN
Ermp1	272.85	-0.258756	0.140667	-1.8395	0.0658424	0.664649	CA-CN
Ifit2	54.7447	-0.356529	0.193894	-1.83878	0.0659475	0.665027	CA-CN
Tmem14c	399.5	0.255032	0.138836	1.83693	0.0662204	0.665048	CA-CN
Ythdf3	854.725	-0.287787	0.156637	-1.83729	0.066167	0.665048	CA-CN
Adam1a	12.7403	-0.349586	0.190309	-1.83694	0.0662185	0.665048	CA-CN
Ier5	1059.18	0.21803	0.118659	1.83746	0.0661427	0.665048	CA-CN
Agap3	137.126	0.264291	0.144546	1.82842	0.0674869	0.665068	CA-CN
Ddx39	305.83	0.229491	0.12527	1.83197	0.0669564	0.665068	CA-CN
Gpatch8	293.922	-0.284875	0.155736	-1.82922	0.0673665	0.665068	CA-CN
Mbnl2	606.736	-0.283639	0.155442	-1.82473	0.0680417	0.665068	CA-CN
Ascc1	86.3768	0.316793	0.173579	1.82506	0.0679914	0.665068	CA-CN
Zfp157	50.0582	-0.344097	0.187827	-1.83199	0.0669528	0.665068	CA-CN
Dph7	41.3646	0.317799	0.174211	1.82422	0.0681183	0.665068	CA-CN
Tbc1d25	34.0058	-0.345619	0.188863	-1.83	0.0672494	0.665068	CA-CN
BC031181	151.085	0.275123	0.150375	1.82958	0.0673128	0.665068	CA-CN
Ice1	287.132	-0.317576	0.174083	-1.82428	0.0681094	0.665068	CA-CN
Nsd1	898.565	-0.31861	0.173978	-1.83133	0.0670513	0.665068	CA-CN
Rbm8a	144.643	0.294819	0.160778	1.83371	0.0666976	0.665068	CA-CN
Clec4n	46.303	-0.334435	0.183041	-1.82711	0.0676836	0.665068	CA-CN
Gm15800	290.676	-0.319281	0.174341	-1.83136	0.0670462	0.665068	CA-CN
Soat2	24.2528	0.355223	0.193606	1.83478	0.0665388	0.665068	CA-CN
Trim30d	143.901	-0.323635	0.177196	-1.82642	0.0677868	0.665068	CA-CN
Mvd	81.7584	-0.312999	0.170955	-1.83089	0.0671177	0.665068	CA-CN
Zfp62	174.678	-0.325577	0.178321	-1.82579	0.0678814	0.665068	CA-CN
Zfp738	40.1779	-0.353757	0.193396	-1.82918	0.0673719	0.665068	CA-CN
Nelfcd	208.985	0.263504	0.143758	1.83297	0.0668068	0.665068	CA-CN
Ociad1	511.748	0.215388	0.11794	1.82625	0.067813	0.665068	CA-CN
Tecpr2	87.8333	-0.308654	0.168113	-1.836	0.066358	0.665068	CA-CN
Gpank1	82.2024	0.319129	0.174797	1.82571	0.067894	0.665068	CA-CN
Usf3	801.5	-0.3462	0.189612	-1.82583	0.0678752	0.665068	CA-CN
Dubr	26.5422	-0.354129	0.194024	-1.82518	0.0679739	0.665068	CA-CN
1700030K09Rik	18.1496	0.354375	0.193992	1.82675	0.0677375	0.665068	CA-CN
Dgkg	243.51	-0.236168	0.12904	-1.83019	0.0672208	0.665068	CA-CN
Psma6	393.917	0.281613	0.15397	1.82902	0.0673968	0.665068	CA-CN
Cpeb2	84.9182	-0.32058	0.176306	-1.81832	0.0690159	0.665158	CA-CN
Atad2	139.082	-0.31905	0.176037	-1.8124	0.0699245	0.665158	CA-CN
Rbfa	157.286	0.271706	0.149581	1.81644	0.0693025	0.665158	CA-CN
H2-Q6	285.604	-0.310741	0.17133	-1.8137	0.0697235	0.665158	CA-CN
Ubxn6	167.239	0.275294	0.151968	1.81152	0.0700605	0.665158	CA-CN
Rabl6	252.513	0.262038	0.143799	1.82225	0.0684173	0.665158	CA-CN
Jmjd7	10.4418	0.341958	0.188305	1.81598	0.0693733	0.665158	CA-CN
Keap1	207.299	0.243255	0.134417	1.80971	0.0703407	0.665158	CA-CN
Myl9	6.86466	-0.301273	0.166261	-1.81205	0.0699783	0.665158	CA-CN
Ptpmt1	56.0662	0.320827	0.176954	1.81305	0.0698241	0.665158	CA-CN
Lat2	218.658	-0.281082	0.154975	-1.81373	0.0697198	0.665158	CA-CN
Slc35a5	144.369	-0.270183	0.149231	-1.8105	0.0702177	0.665158	CA-CN
Nadk2	62.9703	-0.307088	0.168834	-1.81887	0.0689306	0.665158	CA-CN
Coro1a	10577.4	0.257496	0.142293	1.80962	0.0703553	0.665158	CA-CN
Spata5l1	26.1167	-0.353016	0.193912	-1.82049	0.0686844	0.665158	CA-CN
Trip12	1095.91	-0.257585	0.141618	-1.81887	0.0689309	0.665158	CA-CN
Gclm	30.6458	-0.337579	0.185466	-1.82016	0.0687342	0.665158	CA-CN
Ate1	179.688	-0.264831	0.145411	-1.82126	0.068567	0.665158	CA-CN
Gabpb2	887.654	-0.311749	0.172139	-1.81104	0.0701353	0.665158	CA-CN
Cep85l	53.9156	-0.305291	0.168709	-1.80957	0.0703624	0.665158	CA-CN
Ppie	69.5757	0.325188	0.178678	1.81997	0.0687639	0.665158	CA-CN
Exoc4	109.244	-0.338951	0.187153	-1.81109	0.0701269	0.665158	CA-CN
Smchd1	479.558	-0.318546	0.175357	-1.81656	0.0692844	0.665158	CA-CN
Gm5801	127.707	0.254863	0.14052	1.81371	0.0697223	0.665158	CA-CN
9130401M01Rik	103.062	0.269589	0.148315	1.81768	0.0691134	0.665158	CA-CN
Nbas	161.866	-0.324785	0.17859	-1.81861	0.0689708	0.665158	CA-CN
Snx30	168.689	-0.315271	0.172978	-1.8226	0.0683637	0.665158	CA-CN
Etnk1	514.506	-0.286131	0.157273	-1.81933	0.0688611	0.665158	CA-CN
Tpgs1	104.041	0.286213	0.157915	1.81245	0.0699173	0.665158	CA-CN
Fadd	86.2237	0.305766	0.168363	1.81611	0.0693534	0.665158	CA-CN
Gm16576	33.5132	-0.352728	0.194115	-1.8171	0.0692013	0.665158	CA-CN
Ifi205	8.3114	-0.30244	0.166193	-1.81982	0.068787	0.665158	CA-CN
Sar1a	542.327	0.22659	0.125174	1.8102	0.070265	0.665158	CA-CN
Trpm2	338.861	-0.304985	0.169917	-1.79491	0.0726681	0.665589	CA-CN
Btf3l4	38.1071	0.34346	0.191918	1.78961	0.0735159	0.665589	CA-CN
Evi2b	1475.42	-0.237674	0.133951	-1.77433	0.0760081	0.665589	CA-CN
Pop5	62.5512	0.331806	0.189196	1.75377	0.0794699	0.665589	CA-CN
Ubxn7	321.858	-0.334622	0.185878	-1.80023	0.071825	0.665589	CA-CN
Ssna1	195.743	0.294917	0.166826	1.76781	0.0770921	0.665589	CA-CN
Oaz2	189.09	0.27484	0.155624	1.76605	0.0773868	0.665589	CA-CN
Plekhj1	239.619	0.270384	0.154095	1.75466	0.0793177	0.665589	CA-CN
Med8	210.065	0.245348	0.139682	1.75648	0.0790071	0.665589	CA-CN
Gm16845	14.3927	0.343056	0.19306	1.77694	0.0755782	0.665589	CA-CN
P2rx7	311.167	-0.260062	0.145101	-1.79228	0.0730876	0.665589	CA-CN
Ddx60	46.4923	-0.332518	0.189667	-1.75316	0.0795738	0.665589	CA-CN
Pdp2	39.4222	-0.340228	0.192665	-1.76591	0.0774115	0.665589	CA-CN
Trim27	232.974	0.232136	0.129458	1.79313	0.0729515	0.665589	CA-CN
Coil	36.1021	-0.336917	0.190413	-1.7694	0.0768266	0.665589	CA-CN
BC005537	1175.33	-0.266891	0.151864	-1.75744	0.0788434	0.665589	CA-CN
Arrb2	498.028	0.234797	0.133712	1.756	0.0790889	0.665589	CA-CN
Zfp568	91.3715	-0.314825	0.178482	-1.7639	0.0777484	0.665589	CA-CN
Fam199x	49.2297	-0.343187	0.191421	-1.79284	0.0729978	0.665589	CA-CN
Cyp20a1	63.5966	-0.298034	0.169766	-1.75556	0.0791642	0.665589	CA-CN
Mst1r	30	-0.340217	0.190819	-1.78293	0.074598	0.665589	CA-CN
Arl16	34.072	0.326033	0.18503	1.76206	0.0780595	0.665589	CA-CN
4930402H24Rik	32.2278	-0.33874	0.191482	-1.76904	0.0768868	0.665589	CA-CN
2810025M15Rik	20.8097	0.343676	0.193891	1.77252	0.0763086	0.665589	CA-CN
Csnk1g1	256.421	-0.293795	0.165974	-1.77013	0.0767062	0.665589	CA-CN
Dnajb13	12.5358	-0.346038	0.19213	-1.80106	0.071694	0.665589	CA-CN
1810011H11Rik	13.4226	0.340709	0.189749	1.79558	0.072561	0.665589	CA-CN
2510039O18Rik	505.936	0.197331	0.111357	1.77206	0.0763854	0.665589	CA-CN
Rnf7	60.2507	0.319695	0.177332	1.80281	0.0714185	0.665589	CA-CN
Baz2a	1085.69	-0.300766	0.167562	-1.79495	0.072661	0.665589	CA-CN
Zfp131	148.023	-0.2423	0.138103	-1.75448	0.0793476	0.665589	CA-CN
Cdc14b	68.9891	-0.309902	0.176729	-1.75354	0.079509	0.665589	CA-CN
Mtmr10	102.226	-0.307822	0.174145	-1.76762	0.0771246	0.665589	CA-CN
Nelfe	70.9262	0.32825	0.184445	1.77966	0.0751316	0.665589	CA-CN
Atp10d	240.401	-0.26709	0.148704	-1.79612	0.0724759	0.665589	CA-CN
Rpl14	314.784	0.301116	0.170823	1.76274	0.0779448	0.665589	CA-CN
Foxo3	154.484	-0.341295	0.193545	-1.76339	0.0778354	0.665589	CA-CN
Zscan26	341.495	-0.266174	0.148797	-1.78884	0.0736413	0.665589	CA-CN
Dtwd1	13.1376	0.346819	0.192986	1.79712	0.0723163	0.665589	CA-CN
Fam111a	1023.49	-0.202676	0.115441	-1.75567	0.0791454	0.665589	CA-CN
Gm21975	1579.65	-0.237981	0.135103	-1.76148	0.0781574	0.665589	CA-CN
Ptpre	1619.91	-0.219157	0.122562	-1.78813	0.0737544	0.665589	CA-CN
Pik3r1	329.093	-0.288879	0.163805	-1.76356	0.0778067	0.665589	CA-CN
Gng10	312.58	0.250229	0.139988	1.7875	0.0738565	0.665589	CA-CN
Nln	151.755	-0.293916	0.164668	-1.7849	0.0742767	0.665589	CA-CN
Cd300lb	1495.1	-0.194189	0.109507	-1.7733	0.0761796	0.665589	CA-CN
H2-Q8	291.273	-0.305172	0.172068	-1.77356	0.0761366	0.665589	CA-CN
Gpx4	27.4309	0.337091	0.191867	1.75689	0.0789357	0.665589	CA-CN
Mrpl20	142.808	0.28151	0.160568	1.75322	0.079565	0.665589	CA-CN
Ap2s1	379.245	0.293214	0.166399	1.76212	0.0780498	0.665589	CA-CN
Slc7a6	87.9287	-0.279272	0.158725	-1.75947	0.0784979	0.665589	CA-CN
Gamt	13.9491	0.338118	0.192653	1.75507	0.0792482	0.665589	CA-CN
Dapk3	92.5124	0.313146	0.178262	1.75666	0.0789761	0.665589	CA-CN
Lonp1	167.092	0.26464	0.14717	1.7982	0.0721453	0.665589	CA-CN
Abcb7	377.778	-0.305585	0.172076	-1.77588	0.0757531	0.665589	CA-CN
2310009A05Rik	42.2117	0.336991	0.188743	1.78545	0.0741877	0.665589	CA-CN
Casp8	312.453	0.232604	0.130451	1.78308	0.0745739	0.665589	CA-CN
Trim21	169.059	-0.280505	0.157263	-1.78366	0.0744783	0.665589	CA-CN
Cep170	560.534	-0.319787	0.180923	-1.76753	0.0771401	0.665589	CA-CN
Lyz2	30982.1	0.176623	0.0998799	1.76835	0.0770021	0.665589	CA-CN
1810044D09Rik	7.43705	0.310719	0.176996	1.75552	0.079171	0.665589	CA-CN
Leng9	208.13	0.324242	0.181728	1.78421	0.0743891	0.665589	CA-CN
5730480H06Rik	6.78909	-0.313603	0.178018	-1.76164	0.0781308	0.665589	CA-CN
1110038F14Rik	77.2084	0.296726	0.164946	1.79893	0.0720303	0.665589	CA-CN
Alkbh1	57.0429	0.298369	0.167912	1.77694	0.0755788	0.665589	CA-CN
Ecd	128.548	0.267699	0.151354	1.76869	0.0769457	0.665589	CA-CN
Zfp771	13.9042	0.336992	0.192039	1.75481	0.0792921	0.665589	CA-CN
Poll	68.179	0.304697	0.169133	1.80152	0.0716203	0.665589	CA-CN
Il4i1	41.9842	0.339272	0.189314	1.79211	0.0731146	0.665589	CA-CN
Atad2b	245.605	-0.306423	0.172354	-1.77787	0.0754251	0.665589	CA-CN
Zcchc6	614.781	-0.267328	0.149689	-1.78589	0.0741173	0.665589	CA-CN
Ifi203	202.482	-0.282259	0.157309	-1.79429	0.0727664	0.665589	CA-CN
Rps26	179.538	0.313508	0.177305	1.76819	0.0770298	0.665589	CA-CN
Gse1	183.395	-0.270333	0.153819	-1.75747	0.0788377	0.665589	CA-CN
Tcp11l1	23.9926	-0.33944	0.193648	-1.75287	0.079624	0.665589	CA-CN
Sesn3	26.6312	-0.346576	0.19361	-1.79007	0.0734429	0.665589	CA-CN
Abhd8	33.8436	0.344156	0.192611	1.78679	0.0739717	0.665589	CA-CN
Ep400	823.541	-0.264446	0.148448	-1.7814	0.0748468	0.665589	CA-CN
Tbcb	145.502	0.313948	0.177589	1.76783	0.0770893	0.665589	CA-CN
Marf1	653.176	-0.292808	0.16271	-1.79957	0.0719283	0.665589	CA-CN
Gm15441	399.399	-0.314464	0.176547	-1.78119	0.0748811	0.665589	CA-CN
Zmynd11	228.203	-0.241821	0.13707	-1.76421	0.0776964	0.665589	CA-CN
Slc25a22	123.508	-0.261641	0.149234	-1.75323	0.0795623	0.665589	CA-CN
Pigp	8.47772	-0.316798	0.179331	-1.76656	0.0773026	0.665589	CA-CN
Mpv17	132.259	0.271994	0.150727	1.80455	0.0711454	0.665589	CA-CN
Hfe	3375.24	0.21103	0.11695	1.80444	0.0711621	0.665589	CA-CN
Rab20	26.6591	0.34283	0.192412	1.78175	0.0747905	0.665589	CA-CN
Klhl18	272.371	-0.212984	0.121446	-1.75373	0.0794761	0.665589	CA-CN
Atp8a1	259.643	-0.286203	0.15937	-1.79584	0.07252	0.665589	CA-CN
Cbx4	473.441	0.192974	0.10984	1.75686	0.0789412	0.665589	CA-CN
Abl2	179.817	-0.327414	0.184256	-1.77695	0.0755763	0.665589	CA-CN
G2e3	76.1407	-0.341434	0.190874	-1.78879	0.0736485	0.665589	CA-CN
Prr5l	519.665	0.269684	0.151153	1.78418	0.0743945	0.665589	CA-CN
Zbed6	150.897	-0.293461	0.162553	-1.80533	0.0710233	0.665589	CA-CN
Runx2	651.919	-0.268849	0.150763	-1.78325	0.0745449	0.665589	CA-CN
Ccdc9	309.869	0.271062	0.150955	1.79564	0.0725512	0.665589	CA-CN
Zfp41	19.6498	-0.341227	0.194118	-1.75783	0.0787762	0.665589	CA-CN
Lsm6	81.3882	0.295323	0.166497	1.77374	0.0761063	0.665589	CA-CN
Plin2	1165.84	0.242159	0.136871	1.76925	0.076852	0.665589	CA-CN
Gpr155	153.327	-0.313979	0.176925	-1.77465	0.0759558	0.665589	CA-CN
Ifngr1	4906.55	0.178492	0.0996045	1.79201	0.0731317	0.665589	CA-CN
Irak2	399.801	-0.278664	0.158495	-1.75819	0.0787147	0.665589	CA-CN
Pisd-ps1	733.796	-0.234266	0.13227	-1.77112	0.0765414	0.665589	CA-CN
Fbxo11	291.883	-0.249988	0.140507	-1.77919	0.0752093	0.665589	CA-CN
Ncoa7	95.5178	-0.322587	0.179516	-1.79698	0.0723391	0.665589	CA-CN
Lman2l	128.785	-0.281844	0.158213	-1.78142	0.0748439	0.665589	CA-CN
Ceacam1	2509.21	-0.284776	0.16132	-1.76529	0.0775146	0.665589	CA-CN
S100a4	975.164	0.318276	0.179399	1.77413	0.0760417	0.665589	CA-CN
Ube2h	174.673	0.250194	0.139047	1.79935	0.0719638	0.665589	CA-CN
Agtpbp1	110.492	-0.282787	0.158814	-1.78062	0.0749749	0.665589	CA-CN
Gaa	282.933	0.216515	0.121298	1.78499	0.0742633	0.665589	CA-CN
Nxn	33.5457	-0.339011	0.18889	-1.79475	0.0726933	0.665589	CA-CN
1600002H07Rik	30.9926	0.335438	0.18761	1.78795	0.0737837	0.665589	CA-CN
Ttc9c	280.311	-0.249874	0.141073	-1.77123	0.0765219	0.665589	CA-CN
Cdh1	25.1152	0.348206	0.193685	1.7978	0.0722092	0.665589	CA-CN
Psmb6	254.271	0.263335	0.146673	1.79539	0.0725914	0.665589	CA-CN
Flot1	153.877	0.265622	0.149427	1.7776	0.0754689	0.665589	CA-CN
Whsc1l1	762.774	-0.292231	0.163041	-1.79238	0.0730725	0.665589	CA-CN
Vdac3	62.3311	0.309545	0.172818	1.79116	0.0732669	0.665589	CA-CN
Igsf8	77.7326	0.304576	0.171058	1.78055	0.074986	0.665589	CA-CN
Setd7	400.766	-0.308752	0.17592	-1.75507	0.0792478	0.665589	CA-CN
Nme1	93.4194	0.316102	0.179061	1.76533	0.0775082	0.665589	CA-CN
Fancf	22.5962	0.339536	0.192958	1.75964	0.0784695	0.665589	CA-CN
Myadm	1725.27	-0.218058	0.124173	-1.75608	0.079074	0.665589	CA-CN
Casp1	539.696	-0.240454	0.135751	-1.77128	0.0765137	0.665589	CA-CN
Cox14	144.33	0.26132	0.144755	1.80526	0.0710338	0.665589	CA-CN
Zfp942	68.0777	-0.313672	0.177883	-1.76336	0.0778392	0.665589	CA-CN
Zfp949	40.3559	-0.329838	0.185795	-1.77527	0.0758525	0.665589	CA-CN
AW011738	46.7001	-0.346788	0.192745	-1.79921	0.0719852	0.665589	CA-CN
Dclre1c	127.478	-0.283557	0.161689	-1.75371	0.0794798	0.665589	CA-CN
Uevld	33.1763	0.346696	0.194153	1.78569	0.0741499	0.665589	CA-CN
Nfxl1	75.3502	-0.282076	0.158814	-1.77614	0.0757098	0.665589	CA-CN
Rsf1	197.666	-0.308193	0.173352	-1.77784	0.0754295	0.665589	CA-CN
Lpgat1	108.977	-0.312657	0.174676	-1.78993	0.0734659	0.665589	CA-CN
Zfyve16	114.523	-0.31653	0.180441	-1.75421	0.0793951	0.665589	CA-CN
Cnbp	989.285	0.218826	0.122371	1.78822	0.073741	0.665589	CA-CN
Amz1	207.159	-0.292753	0.1671	-1.75196	0.07978	0.66576	CA-CN
Abca7	1695.45	-0.189616	0.108223	-1.75209	0.0797589	0.66576	CA-CN
Atg2a	385.505	-0.231104	0.132277	-1.74713	0.0806155	0.665962	CA-CN
Mast2	113.188	-0.261169	0.149468	-1.74732	0.0805819	0.665962	CA-CN
Akap11	117.419	-0.31864	0.182206	-1.74879	0.0803269	0.665962	CA-CN
Zfp653	67.1471	0.298953	0.170824	1.75006	0.0801075	0.665962	CA-CN
Timm21	40.8594	0.319008	0.182796	1.74516	0.0809568	0.665962	CA-CN
Nucb1	628.9	0.195611	0.111848	1.74891	0.0803067	0.665962	CA-CN
Eral1	112.7	0.274298	0.15684	1.74891	0.0803071	0.665962	CA-CN
Pex1	56.8927	-0.325088	0.185966	-1.7481	0.0804465	0.665962	CA-CN
Derl1	639.317	0.193807	0.110904	1.74752	0.0805474	0.665962	CA-CN
Atp1b3	969.555	0.214717	0.12276	1.74908	0.0802765	0.665962	CA-CN
Id1	41.1251	0.31281	0.179062	1.74693	0.0806487	0.665962	CA-CN
Tmppe	284.88	-0.237613	0.136141	-1.74534	0.0809263	0.665962	CA-CN
Nt5c2	131.337	-0.286396	0.163983	-1.7465	0.0807247	0.665962	CA-CN
Zfp12	51.4702	-0.30521	0.174794	-1.74611	0.0807915	0.665962	CA-CN
Rab3gap2	271.213	-0.235152	0.134461	-1.74885	0.0803166	0.665962	CA-CN
Zfp292	204.321	-0.315578	0.180804	-1.74542	0.0809121	0.665962	CA-CN
Cdk13	460.914	-0.264068	0.151226	-1.74618	0.0807798	0.665962	CA-CN
Mfge8	43.986	0.322176	0.184652	1.74477	0.0810247	0.665962	CA-CN
Gins2	15.6806	0.335881	0.192585	1.74407	0.081147	0.66641	CA-CN
Kdm3a	212.728	-0.277754	0.159292	-1.74368	0.0812153	0.666413	CA-CN
Nod2	216.45	-0.313549	0.180156	-1.74042	0.0817846	0.669628	CA-CN
Tmem259	771.387	0.226703	0.130269	1.74027	0.0818116	0.669628	CA-CN
Ptafr	63.4444	-0.335447	0.192738	-1.74043	0.0817836	0.669628	CA-CN
Zfp148	293.177	-0.278419	0.160142	-1.73857	0.0821105	0.670319	CA-CN
Top2a	45.039	-0.33624	0.19409	-1.7324	0.0832031	0.670319	CA-CN
Map4k2	949.15	-0.232112	0.133997	-1.73222	0.0832343	0.670319	CA-CN
Tm2d1	43.124	0.329553	0.190253	1.73219	0.0832401	0.670319	CA-CN
Cecr5	246.931	-0.237308	0.136605	-1.73718	0.0823551	0.670319	CA-CN
Kynu	21.1177	0.336866	0.193876	1.73753	0.0822937	0.670319	CA-CN
Eno1b	722.513	0.230835	0.13275	1.73887	0.0820575	0.670319	CA-CN
Blm	37.3616	-0.331119	0.191212	-1.73169	0.0833292	0.670319	CA-CN
Relt	415.931	0.184108	0.106102	1.7352	0.0827057	0.670319	CA-CN
Rpl32	449.411	0.292476	0.168883	1.73183	0.083304	0.670319	CA-CN
Nans	116.755	0.273919	0.157928	1.73445	0.082838	0.670319	CA-CN
Sgms1	525.47	-0.245443	0.14144	-1.73532	0.0826848	0.670319	CA-CN
Sec16a	655.024	-0.259249	0.149665	-1.73219	0.0832391	0.670319	CA-CN
Map3k2	345.309	-0.321489	0.185275	-1.7352	0.0827059	0.670319	CA-CN
Gtf2h3	81.1515	0.276191	0.159414	1.73254	0.0831767	0.670319	CA-CN
Eif5a	1474.09	0.205024	0.118006	1.73741	0.0823152	0.670319	CA-CN
Mrps17	138.778	0.274576	0.158122	1.73648	0.0824792	0.670319	CA-CN
Heg1	636.506	-0.31543	0.181773	-1.7353	0.0826876	0.670319	CA-CN
Pus10	63.2259	-0.300006	0.173083	-1.7333	0.0830423	0.670319	CA-CN
Fam192a	259.715	0.238795	0.137332	1.73881	0.0820674	0.670319	CA-CN
Ndufaf7	147.909	0.261981	0.151113	1.73368	0.0829758	0.670319	CA-CN
Hsp90aa1	136.049	-0.31208	0.180355	-1.73037	0.0835647	0.670389	CA-CN
4930581F22Rik	75.287	-0.312249	0.181055	-1.72461	0.0845987	0.670389	CA-CN
Gtf3a	158.326	0.283043	0.164212	1.72365	0.0847713	0.670389	CA-CN
Ubox5	45.4708	0.310423	0.179539	1.72901	0.083808	0.670389	CA-CN
Sart1	317.285	0.250274	0.145011	1.72589	0.0843665	0.670389	CA-CN
Igsf6	1496.94	-0.19132	0.110535	-1.73085	0.0834777	0.670389	CA-CN
Clcn6	66.1998	-0.299456	0.17363	-1.72468	0.084585	0.670389	CA-CN
Fkbp8	596.689	0.247917	0.14348	1.72788	0.084009	0.670389	CA-CN
Fyttd1	110.21	-0.268759	0.155438	-1.72904	0.0838019	0.670389	CA-CN
Suz12	278.624	-0.247601	0.143411	-1.72651	0.0842554	0.670389	CA-CN
Rab11b	427.786	0.190822	0.110354	1.72918	0.0837773	0.670389	CA-CN
Grcc10	232.588	0.297987	0.172661	1.72585	0.0843742	0.670389	CA-CN
Man1a	418.229	-0.325471	0.188387	-1.72768	0.0840462	0.670389	CA-CN
Dhx38	436.672	0.211097	0.122436	1.72413	0.0846838	0.670389	CA-CN
Ppa1	15.0085	0.325785	0.188861	1.725	0.0845272	0.670389	CA-CN
Efcab9	14.0941	-0.334606	0.194086	-1.72401	0.0847059	0.670389	CA-CN
Stat4	30.8318	0.334335	0.19335	1.72917	0.0837786	0.670389	CA-CN
Aktip	73.5946	0.306348	0.177724	1.72372	0.0847577	0.670389	CA-CN
Wdr44	89.9619	-0.318879	0.184938	-1.72425	0.0846629	0.670389	CA-CN
Wdr45	98.1663	0.301624	0.174858	1.72497	0.0845327	0.670389	CA-CN
Phf5a	112.407	0.288357	0.167247	1.72414	0.0846823	0.670389	CA-CN
Map3k8	388.71	-0.229207	0.133073	-1.72241	0.0849947	0.671075	CA-CN
1110004E09Rik	9.86017	0.310758	0.180384	1.72276	0.0849325	0.671075	CA-CN
Nrip1	69.4739	-0.293257	0.170505	-1.71994	0.0854441	0.673001	CA-CN
Zhx1	306.96	-0.266738	0.155073	-1.72007	0.0854189	0.673001	CA-CN
Lyl1	1392.88	0.232917	0.135403	1.72018	0.0854002	0.673001	CA-CN
Zfp369	21.4808	-0.307286	0.179147	-1.71527	0.086295	0.673017	CA-CN
Pnkp	325.37	0.274252	0.160246	1.71144	0.0869992	0.673017	CA-CN
Brcc3	73.3144	-0.296978	0.173486	-1.71183	0.0869284	0.673017	CA-CN
Phka2	301.025	-0.242495	0.141278	-1.71644	0.086081	0.673017	CA-CN
Tbl1x	60.386	-0.301648	0.176202	-1.71194	0.0869069	0.673017	CA-CN
Lrrc47	227.932	0.22966	0.133868	1.71557	0.0862402	0.673017	CA-CN
Svbp	48.1114	0.323125	0.188563	1.71361	0.0865996	0.673017	CA-CN
Aamdc	16.028	0.331078	0.19332	1.71259	0.0867884	0.673017	CA-CN
Metrn	25.8972	0.333279	0.193988	1.71804	0.0857889	0.673017	CA-CN
Arhgef6	463.992	-0.282209	0.16428	-1.71786	0.085823	0.673017	CA-CN
Herc1	636.115	-0.295643	0.172832	-1.71058	0.0871591	0.673017	CA-CN
Urb1	101.849	-0.279148	0.16297	-1.71287	0.0867356	0.673017	CA-CN
Mapk6	109.194	-0.290965	0.169748	-1.7141	0.086511	0.673017	CA-CN
Fen1	114.484	0.271223	0.15842	1.71206	0.0868864	0.673017	CA-CN
B3gat3	223.95	0.284573	0.165841	1.71594	0.0861739	0.673017	CA-CN
Dcp2	336.429	-0.283439	0.164954	-1.71829	0.0857439	0.673017	CA-CN
Map3k9	89.4936	-0.296862	0.173263	-1.71337	0.0866451	0.673017	CA-CN
Gas2	12.6393	0.331418	0.193304	1.71449	0.0864388	0.673017	CA-CN
Slc35e3	95.3954	-0.26566	0.155291	-1.71073	0.0871318	0.673017	CA-CN
Ammecr1l	228.386	-0.217076	0.126831	-1.71154	0.0869816	0.673017	CA-CN
1700047A11Rik	2.72988	-0.205866	0.119965	-1.71606	0.0861515	0.673017	CA-CN
Megf8	103.837	-0.267785	0.156536	-1.71069	0.087138	0.673017	CA-CN
Fdxr	42.6934	0.31991	0.1861	1.71903	0.0856094	0.673017	CA-CN
Mtor	228.194	-0.264745	0.15397	-1.71946	0.085531	0.673017	CA-CN
Zfp946	18.3364	-0.332397	0.193785	-1.71529	0.0862924	0.673017	CA-CN
G3bp1	324.835	0.228769	0.133773	1.71013	0.0872416	0.673124	CA-CN
Synj1	954.413	-0.253821	0.148542	-1.70875	0.0874975	0.673127	CA-CN
Pkp3	41.5545	0.307279	0.17991	1.70796	0.0876445	0.673127	CA-CN
Ubap2l	523.748	-0.240734	0.140918	-1.70833	0.0875758	0.673127	CA-CN
Cd300lf	110.788	0.301558	0.176495	1.70859	0.0875265	0.673127	CA-CN
Ddx51	103.009	-0.260488	0.152518	-1.70791	0.0876531	0.673127	CA-CN
Clta	543.867	0.251274	0.147041	1.70887	0.0874744	0.673127	CA-CN
Hes1	534.435	0.241103	0.141254	1.70688	0.087845	0.67375	CA-CN
Ccnd1	22.3416	-0.329128	0.192841	-1.70673	0.0878714	0.67375	CA-CN
Tspo	251.399	0.293297	0.171928	1.70594	0.08802	0.674363	CA-CN
Avl9	204.073	-0.303863	0.17819	-1.70527	0.0881435	0.674782	CA-CN
Eif3a	687.859	-0.236426	0.138764	-1.7038	0.0884182	0.675106	CA-CN
Phc3	412.856	-0.309888	0.181904	-1.70357	0.0884608	0.675106	CA-CN
Zfp142	103.873	-0.280099	0.164336	-1.70444	0.0882997	0.675106	CA-CN
Map4	601.949	-0.21148	0.124104	-1.70406	0.0883705	0.675106	CA-CN
Klhl17	40.941	0.310693	0.182486	1.70256	0.0886502	0.675388	CA-CN
Usp34	547.326	-0.217378	0.127741	-1.70171	0.0888093	0.675388	CA-CN
Osbpl8	692.129	-0.296967	0.174528	-1.70154	0.0888407	0.675388	CA-CN
Pcgf3	69.1055	-0.32215	0.189329	-1.70154	0.0888415	0.675388	CA-CN
Chpf2	268.099	0.223393	0.131254	1.70199	0.0887568	0.675388	CA-CN
Gabpb1	100.251	0.274129	0.161278	1.69972	0.0891829	0.677459	CA-CN
Dnaaf3	33.5355	-0.320143	0.18887	-1.69504	0.0900679	0.679524	CA-CN
Chst12	437.289	0.256954	0.151636	1.69454	0.0901625	0.679524	CA-CN
Ptpn18	227.189	0.286952	0.169374	1.69419	0.0902287	0.679524	CA-CN
Trip10	22.4564	0.322956	0.190693	1.69359	0.0903428	0.679524	CA-CN
Pfkm	15.0277	0.325893	0.192434	1.69353	0.0903541	0.679524	CA-CN
Mt1	9.22947	0.310049	0.182658	1.69743	0.0896157	0.679524	CA-CN
Cmc2	16.2458	0.329013	0.194159	1.69455	0.09016	0.679524	CA-CN
Brwd1	121.179	-0.325171	0.191974	-1.69382	0.0902988	0.679524	CA-CN
Heatr5a	381.964	-0.31476	0.185523	-1.69661	0.0897711	0.679524	CA-CN
Mrpl14	132.95	0.298879	0.176083	1.69737	0.0896268	0.679524	CA-CN
Appl1	135.198	-0.282712	0.166708	-1.69585	0.0899139	0.679524	CA-CN
Phactr2	335.252	-0.283551	0.167183	-1.69605	0.089876	0.679524	CA-CN
Ifitm2	1906.75	0.268405	0.158157	1.69708	0.0896809	0.679524	CA-CN
Pde1b	382.876	-0.240564	0.142151	-1.69232	0.0905852	0.679941	CA-CN
Gm12338	13.9945	-0.319049	0.188627	-1.69142	0.0907557	0.679941	CA-CN
Oas1g	43.7951	0.328066	0.193931	1.69167	0.0907099	0.679941	CA-CN
Nol8	92.4947	-0.280723	0.165963	-1.69148	0.0907461	0.679941	CA-CN
Arfgef1	563.253	-0.288383	0.170368	-1.69271	0.0905103	0.679941	CA-CN
N4bp1	1177.71	-0.240913	0.142503	-1.69058	0.0909176	0.680635	CA-CN
Coq9	85.9479	0.263804	0.156085	1.69013	0.0910023	0.68075	CA-CN
Auh	56.3725	0.308049	0.182345	1.68938	0.0911468	0.681312	CA-CN
Cox6b2	7.75714	0.271179	0.161743	1.67661	0.0936193	0.681755	CA-CN
Fcgr2b	570.114	0.251033	0.149544	1.67866	0.0932184	0.681755	CA-CN
Dvl3	183.59	-0.208231	0.125099	-1.66453	0.0960062	0.681755	CA-CN
Atp11b	335.071	-0.277765	0.16599	-1.67339	0.094251	0.681755	CA-CN
Cdc27	140.178	-0.276918	0.164054	-1.68797	0.0914175	0.681755	CA-CN
Cst3	9613.29	0.261972	0.155855	1.68087	0.0927876	0.681755	CA-CN
Cpsf7	437.239	-0.226487	0.135312	-1.67381	0.0941685	0.681755	CA-CN
Ccser2	62.6714	-0.316029	0.188154	-1.67963	0.0930294	0.681755	CA-CN
Vps13c	475.714	-0.305842	0.182674	-1.67425	0.0940816	0.681755	CA-CN
Zyg11b	188.566	-0.290709	0.174128	-1.66951	0.0950163	0.681755	CA-CN
Mrps16	61.1418	0.302916	0.181255	1.67122	0.0946787	0.681755	CA-CN
Wrn	192.597	-0.290778	0.1733	-1.67788	0.09337	0.681755	CA-CN
Nup205	219.194	-0.281363	0.16715	-1.6833	0.0923173	0.681755	CA-CN
Msmp	28.0085	-0.322856	0.193601	-1.66763	0.0953885	0.681755	CA-CN
Arpc4	1947.32	0.241509	0.145066	1.66482	0.0959478	0.681755	CA-CN
Fam65b	430.625	-0.301012	0.18093	-1.6637	0.0961731	0.681755	CA-CN
Flt1	254.059	-0.318315	0.189644	-1.67848	0.0932531	0.681755	CA-CN
Acaa1a	190.203	0.257744	0.153085	1.68367	0.0922462	0.681755	CA-CN
Kif19a	19.9518	0.325739	0.193994	1.67912	0.093129	0.681755	CA-CN
Rin3	1258.13	-0.231715	0.13923	-1.66426	0.0960605	0.681755	CA-CN
Btaf1	401.14	-0.269668	0.160291	-1.68237	0.0924975	0.681755	CA-CN
Phb2	317.309	0.276154	0.165114	1.6725	0.0944253	0.681755	CA-CN
Mphosph6	24.6793	0.318882	0.190822	1.6711	0.0947026	0.681755	CA-CN
Myof	120.635	-0.32414	0.193316	-1.67673	0.0935949	0.681755	CA-CN
Naip2	946.617	-0.21494	0.128426	-1.67365	0.0941995	0.681755	CA-CN
Nin	1088.78	-0.286871	0.171421	-1.67349	0.0942317	0.681755	CA-CN
Eno1	709.832	0.218875	0.13123	1.66787	0.0953415	0.681755	CA-CN
Hes6	97.4028	0.283009	0.169936	1.66539	0.0958359	0.681755	CA-CN
Prpf19	309.231	0.195235	0.117193	1.66593	0.0957267	0.681755	CA-CN
Smg7	515.236	-0.207133	0.124299	-1.66641	0.095632	0.681755	CA-CN
Adssl1	969.636	0.206872	0.124296	1.66435	0.0960423	0.681755	CA-CN
Scarf1	56.1843	-0.291374	0.172975	-1.68449	0.0920871	0.681755	CA-CN
Ftl1	2918.55	0.254719	0.152467	1.67065	0.0947911	0.681755	CA-CN
Cox16	114.567	0.267263	0.160723	1.66287	0.0963375	0.681755	CA-CN
Tor1a	324.977	0.211932	0.126261	1.67853	0.0932438	0.681755	CA-CN
Pdlim5	652.308	-0.215394	0.129284	-1.66605	0.0957034	0.681755	CA-CN
Zfp280d	54.0234	-0.314981	0.187237	-1.68226	0.0925193	0.681755	CA-CN
Crebrf	383.767	-0.293435	0.176345	-1.66399	0.0961151	0.681755	CA-CN
Pitrm1	117.596	-0.256306	0.152172	-1.68432	0.0921194	0.681755	CA-CN
Kdm5a	539.068	-0.231981	0.137841	-1.68295	0.092384	0.681755	CA-CN
Tyw1	90.0738	0.255839	0.152108	1.68195	0.0925778	0.681755	CA-CN
Cxxc1	283.707	0.212782	0.127736	1.66579	0.0957543	0.681755	CA-CN
Commd9	32.7871	0.324463	0.192413	1.68628	0.0917414	0.681755	CA-CN
Secisbp2l	460.621	-0.30089	0.1798	-1.67347	0.094235	0.681755	CA-CN
Rad9b	8.58214	-0.317226	0.187908	-1.6882	0.0913736	0.681755	CA-CN
Foxk1	1035.18	-0.282738	0.168821	-1.67479	0.0939764	0.681755	CA-CN
Tbcc	44.1423	0.301281	0.181184	1.66285	0.0963426	0.681755	CA-CN
Creld1	18.4191	0.326214	0.194176	1.67999	0.0929586	0.681755	CA-CN
Gls	447.228	-0.266308	0.160054	-1.66386	0.0961398	0.681755	CA-CN
Map2k6	9.50374	0.310747	0.185459	1.67556	0.0938251	0.681755	CA-CN
Epm2aip1	124.375	-0.316021	0.188237	-1.67885	0.0931818	0.681755	CA-CN
Slk	1109.37	-0.25458	0.152553	-1.6688	0.0951566	0.681755	CA-CN
Tmem120a	99.7841	0.296816	0.175796	1.68841	0.0913323	0.681755	CA-CN
Rgl1	23.3757	-0.324658	0.193963	-1.67382	0.0941666	0.681755	CA-CN
Ubxn1	289.197	0.295855	0.176056	1.68046	0.0928681	0.681755	CA-CN
Casp4	218.881	-0.28229	0.168143	-1.67887	0.0931783	0.681755	CA-CN
Capn7	244.583	-0.237058	0.141783	-1.67197	0.0945296	0.681755	CA-CN
Dpep2	788.626	0.267728	0.160961	1.66331	0.0962501	0.681755	CA-CN
Ube4a	431.608	-0.241893	0.14481	-1.67042	0.0948365	0.681755	CA-CN
Eps15	620.255	-0.215852	0.128695	-1.67723	0.0934966	0.681755	CA-CN
Ube2r2	416.247	0.280391	0.166769	1.68131	0.0927023	0.681755	CA-CN
Slc9a2	20.9823	0.315219	0.18881	1.6695	0.0950182	0.681755	CA-CN
Ppp1r12a	608.568	-0.235517	0.140784	-1.6729	0.0943471	0.681755	CA-CN
Ptbp3	2386.58	-0.270269	0.161413	-1.6744	0.0940524	0.681755	CA-CN
Atf2	267.792	-0.239986	0.143015	-1.67805	0.0933372	0.681755	CA-CN
Dmtf1	328.005	-0.234425	0.13942	-1.68143	0.0926785	0.681755	CA-CN
Idua	209.491	-0.215493	0.129351	-1.66596	0.0957208	0.681755	CA-CN
Setmar	19.9688	0.324418	0.193552	1.67613	0.0937127	0.681755	CA-CN
Usp9x	421.604	-0.313419	0.186567	-1.67993	0.0929715	0.681755	CA-CN
Ssh1	186.533	-0.319627	0.190401	-1.6787	0.09321	0.681755	CA-CN
Idh2	59.6653	0.296058	0.176498	1.6774	0.093464	0.681755	CA-CN
9130008F23Rik	46.3654	-0.314995	0.18899	-1.66673	0.0955687	0.681755	CA-CN
Rcan1	447.641	0.200182	0.120303	1.66398	0.0961159	0.681755	CA-CN
Clns1a	205.205	0.23488	0.140978	1.66608	0.0956977	0.681755	CA-CN
Mapk9	239.351	-0.234642	0.141285	-1.66077	0.0967599	0.681791	CA-CN
S100a6	503.194	0.294214	0.17706	1.66166	0.096581	0.681791	CA-CN
Mettl2	95.7613	0.251945	0.151613	1.66176	0.096561	0.681791	CA-CN
Rtca	58.451	0.274602	0.165292	1.66132	0.0966496	0.681791	CA-CN
Gbp2	330.131	-0.313349	0.188546	-1.66192	0.096529	0.681791	CA-CN
Rab39	51.3701	-0.311892	0.187802	-1.66075	0.0967641	0.681791	CA-CN
Rbx1	149.675	0.242744	0.150181	1.61635	0.106019	0.682798	CA-CN
Maml2	126.596	-0.244373	0.149528	-1.63429	0.102197	0.682798	CA-CN
Helz	160.975	-0.278518	0.17233	-1.61619	0.106053	0.682798	CA-CN
Bptf	735.315	-0.175835	0.109716	-1.60264	0.109015	0.682798	CA-CN
Sf3b1	3319.4	-0.210435	0.127296	-1.65312	0.0983059	0.682798	CA-CN
Pars2	27.7143	0.31712	0.191397	1.65687	0.0975453	0.682798	CA-CN
Zfyve27	264.463	-0.208696	0.130395	-1.60049	0.10949	0.682798	CA-CN
Trappc2	14.4617	0.309701	0.190367	1.62686	0.103767	0.682798	CA-CN
Lypla2	558.408	0.23888	0.147832	1.61589	0.106118	0.682798	CA-CN
Prpf4b	369.99	-0.300638	0.183117	-1.64178	0.100635	0.682798	CA-CN
1700096K18Rik	14.7177	0.311101	0.193715	1.60598	0.108279	0.682798	CA-CN
Nr2f6	76.2001	0.28099	0.173014	1.62409	0.104358	0.682798	CA-CN
Nol12	81.0661	0.286972	0.178317	1.60934	0.107543	0.682798	CA-CN
Gdf3	95.7606	0.246805	0.153863	1.60406	0.108702	0.682798	CA-CN
Gm5086	97.8971	0.280647	0.172405	1.62783	0.103561	0.682798	CA-CN
Ggct	78.8632	0.274116	0.165476	1.65652	0.0976156	0.682798	CA-CN
Rgcc	3.87974	-0.23301	0.144632	-1.61106	0.107167	0.682798	CA-CN
Parp11	197.252	-0.241363	0.14967	-1.61264	0.106823	0.682798	CA-CN
Cltc	1562.92	-0.262555	0.160819	-1.63261	0.102551	0.682798	CA-CN
Hcfc2	61.964	-0.305172	0.185419	-1.64585	0.0997947	0.682798	CA-CN
Iqgap2	115.668	-0.270274	0.164874	-1.63927	0.101157	0.682798	CA-CN
Gprasp1	63.2095	-0.295642	0.184702	-1.60065	0.109455	0.682798	CA-CN
Pin1	98.3303	0.280789	0.172823	1.62472	0.104222	0.682798	CA-CN
Tmco6	80.4428	0.265418	0.162913	1.62921	0.103269	0.682798	CA-CN
Tomm7	137.994	0.256565	0.159934	1.60419	0.108671	0.682798	CA-CN
St6galnac6	201.118	0.225445	0.139018	1.6217	0.104868	0.682798	CA-CN
Tctex1d4	5.22491	0.275116	0.170806	1.61069	0.107246	0.682798	CA-CN
Nhsl2	666.628	-0.270955	0.163663	-1.65556	0.0978105	0.682798	CA-CN
Mrpl48	28.0441	0.304014	0.18814	1.6159	0.106117	0.682798	CA-CN
Sap130	231.41	-0.207127	0.128345	-1.61383	0.106564	0.682798	CA-CN
Slc19a2	28.4858	0.310421	0.19162	1.61999	0.105235	0.682798	CA-CN
Prkcd	4261.86	-0.163347	0.101374	-1.61133	0.107108	0.682798	CA-CN
Apool	41.3652	-0.313606	0.190543	-1.64586	0.0997934	0.682798	CA-CN
Kmt2b	674.941	-0.193547	0.120379	-1.60781	0.107876	0.682798	CA-CN
Ugt1a10	482.019	0.216042	0.132407	1.63164	0.102755	0.682798	CA-CN
Slc25a27	27.9419	-0.313016	0.192416	-1.62676	0.103787	0.682798	CA-CN
4931406P16Rik	122.68	-0.270013	0.166553	-1.62119	0.104978	0.682798	CA-CN
Ercc5	109.198	-0.248485	0.152478	-1.62965	0.103176	0.682798	CA-CN
Ubald1	174.32	0.245973	0.149836	1.64161	0.10067	0.682798	CA-CN
Abcb1b	45.3948	-0.293914	0.181684	-1.61772	0.105722	0.682798	CA-CN
Taf1d	60.4012	0.301942	0.184406	1.63737	0.101553	0.682798	CA-CN
Pet100	94.0424	0.300779	0.185522	1.62126	0.104962	0.682798	CA-CN
Mkl1	996.846	-0.202724	0.124446	-1.62901	0.103312	0.682798	CA-CN
Nop2	94.7402	0.248862	0.152132	1.63582	0.101876	0.682798	CA-CN
Dazap1	231.715	0.242221	0.146424	1.65424	0.0980786	0.682798	CA-CN
Uqcrc1	704.044	0.229514	0.142709	1.60827	0.107777	0.682798	CA-CN
Hddc2	11.2067	0.304916	0.185969	1.63961	0.101087	0.682798	CA-CN
Parp1	213.038	0.22378	0.136819	1.6356	0.101924	0.682798	CA-CN
Tsix	102.516	-0.244571	0.152027	-1.60873	0.107675	0.682798	CA-CN
Eif2s3x	30.4214	-0.308943	0.186321	-1.65812	0.0972923	0.682798	CA-CN
Erbin	687.671	-0.304643	0.184417	-1.65193	0.0985493	0.682798	CA-CN
Ugt1a1	483.919	0.21371	0.131272	1.62799	0.103526	0.682798	CA-CN
Atg5	167.14	0.217954	0.135372	1.61004	0.107388	0.682798	CA-CN
Cuedc2	186.62	0.266988	0.161351	1.6547	0.0979844	0.682798	CA-CN
Stxbp5	71.0476	-0.279192	0.172955	-1.61424	0.106474	0.682798	CA-CN
Snx13	147.43	-0.29679	0.184752	-1.60642	0.108181	0.682798	CA-CN
Ahctf1	203.687	-0.257475	0.157651	-1.63319	0.102428	0.682798	CA-CN
1700001J03Rik	2.91927	0.205441	0.126427	1.62498	0.104167	0.682798	CA-CN
Ccdc85b	56.5293	0.289933	0.177404	1.63431	0.102194	0.682798	CA-CN
Ugt1a5	483.013	0.212544	0.132267	1.60693	0.108069	0.682798	CA-CN
Cep85	69.0079	-0.284659	0.174401	-1.6322	0.102636	0.682798	CA-CN
Arhgap21	81.8239	-0.296846	0.1827	-1.62477	0.104211	0.682798	CA-CN
Sass6	47.1457	-0.290025	0.178589	-1.62398	0.104381	0.682798	CA-CN
Ei24	285.989	0.188692	0.117888	1.6006	0.109465	0.682798	CA-CN
Ogfod1	126.169	-0.27855	0.168052	-1.65752	0.097414	0.682798	CA-CN
Plekhm1	735.222	-0.196977	0.122179	-1.6122	0.106918	0.682798	CA-CN
Dhx58	204.905	0.219596	0.137108	1.60163	0.109237	0.682798	CA-CN
Stk35	221.976	-0.270691	0.166564	-1.62515	0.104131	0.682798	CA-CN
Aim1	530.902	-0.219545	0.135052	-1.62563	0.104028	0.682798	CA-CN
Heca	322.089	-0.300611	0.183761	-1.63588	0.101864	0.682798	CA-CN
Ugt1a2	482.92	0.213789	0.132977	1.60772	0.107897	0.682798	CA-CN
Slc41a1	239.037	-0.262897	0.159533	-1.64791	0.0993702	0.682798	CA-CN
Pik3c2a	203.536	-0.308296	0.187492	-1.64431	0.100111	0.682798	CA-CN
BC030336	99.9079	-0.280513	0.173969	-1.61243	0.106868	0.682798	CA-CN
Rabac1	384.817	0.29193	0.176459	1.65438	0.0980505	0.682798	CA-CN
Ercc6	104.459	-0.281633	0.171001	-1.64696	0.0995653	0.682798	CA-CN
Coq6	41.0093	0.302497	0.186242	1.62422	0.10433	0.682798	CA-CN
Ugt1a9	482.019	0.216042	0.132407	1.63164	0.102755	0.682798	CA-CN
Gm12191	197.351	0.269211	0.166529	1.6166	0.105965	0.682798	CA-CN
Mcph1	20.2278	-0.316203	0.193496	-1.63416	0.102226	0.682798	CA-CN
Rreb1	400.723	-0.28167	0.175465	-1.60527	0.108434	0.682798	CA-CN
Smim7	332.745	0.20235	0.125128	1.61714	0.105848	0.682798	CA-CN
Dis3	37.4589	-0.301134	0.184229	-1.63457	0.10214	0.682798	CA-CN
Zbtb17	128.88	0.247384	0.154371	1.60253	0.109039	0.682798	CA-CN
Insig1	164.177	-0.25074	0.153509	-1.63339	0.102386	0.682798	CA-CN
Spata45	2.82536	-0.21869	0.13486	-1.62161	0.104888	0.682798	CA-CN
Fance	43.9925	0.298022	0.186125	1.60119	0.109335	0.682798	CA-CN
Mboat1	71.4072	-0.278809	0.170909	-1.63133	0.102821	0.682798	CA-CN
Myg1	113.207	0.287556	0.174316	1.64963	0.0990195	0.682798	CA-CN
Prkdc	117.323	-0.299994	0.184709	-1.62414	0.104346	0.682798	CA-CN
Setbp1	177.302	-0.290937	0.179673	-1.61926	0.105391	0.682798	CA-CN
Slc29a3	90.1589	-0.295048	0.179848	-1.64054	0.100892	0.682798	CA-CN
Zfp866	169.857	-0.248568	0.15258	-1.6291	0.103291	0.682798	CA-CN
H2-Oa	9.77615	0.272711	0.170356	1.60083	0.109415	0.682798	CA-CN
Asxl2	203.355	-0.283865	0.176848	-1.60514	0.108464	0.682798	CA-CN
Nmnat3	20.6984	0.314155	0.193839	1.6207	0.105083	0.682798	CA-CN
Atp5s	8.68811	0.29691	0.179735	1.65193	0.0985484	0.682798	CA-CN
Chd2	380.703	-0.244309	0.1485	-1.64518	0.0999326	0.682798	CA-CN
Shtn1	98.3671	0.287624	0.176596	1.62871	0.103375	0.682798	CA-CN
Atxn7l1	149.899	-0.304979	0.187316	-1.62815	0.103492	0.682798	CA-CN
Myl12b	1872.89	0.225007	0.136848	1.64421	0.100134	0.682798	CA-CN
Washc1	119.267	0.260419	0.159194	1.63586	0.101868	0.682798	CA-CN
Hip1r	167.072	-0.24452	0.152051	-1.60815	0.107802	0.682798	CA-CN
Prdm2	499.709	-0.255065	0.15764	-1.61802	0.105658	0.682798	CA-CN
Ttll3	603.331	0.284405	0.176971	1.60707	0.108039	0.682798	CA-CN
Lrrcc1	40.5858	-0.313715	0.193571	-1.62067	0.105089	0.682798	CA-CN
Uap1l1	61.9489	0.272193	0.168387	1.61647	0.105993	0.682798	CA-CN
Fbxo42	162.023	-0.240376	0.149307	-1.60995	0.10741	0.682798	CA-CN
Lcmt1	40.8208	0.306418	0.185738	1.64973	0.0989987	0.682798	CA-CN
Armcx2	25.7938	0.311084	0.192798	1.61353	0.10663	0.682798	CA-CN
Pfkl	296.893	0.226683	0.139958	1.61965	0.105307	0.682798	CA-CN
Fnip1	158.414	-0.281013	0.173291	-1.62163	0.104884	0.682798	CA-CN
Thrap3	280.564	-0.232955	0.14091	-1.65321	0.0982873	0.682798	CA-CN
Crebbp	749.268	-0.314054	0.191063	-1.64372	0.100233	0.682798	CA-CN
Arpc1a	320.576	0.212371	0.128171	1.65693	0.0975334	0.682798	CA-CN
Stag2	790.292	-0.267759	0.165794	-1.61501	0.106309	0.682798	CA-CN
Tmed3	164.004	0.256824	0.157021	1.63561	0.101922	0.682798	CA-CN
1110008F13Rik	460.176	0.232031	0.141731	1.63713	0.101604	0.682798	CA-CN
BC068281	22.8765	-0.311175	0.192993	-1.61236	0.106883	0.682798	CA-CN
Pgls	162.532	0.277294	0.170536	1.62601	0.103946	0.682798	CA-CN
Herc6	125.206	-0.259303	0.160774	-1.61285	0.106778	0.682798	CA-CN
Nup107	258.772	0.220518	0.137575	1.60289	0.108959	0.682798	CA-CN
Mbd6	553.778	-0.208328	0.12829	-1.62388	0.1044	0.682798	CA-CN
Mgat5	48.7738	-0.315056	0.193985	-1.62412	0.10435	0.682798	CA-CN
Pkd1	392.564	-0.268943	0.167755	-1.6032	0.108892	0.682798	CA-CN
Bcl2a1a	97.5619	0.265133	0.163305	1.62354	0.104473	0.682798	CA-CN
Sec13	237.444	0.207289	0.129069	1.60603	0.108268	0.682798	CA-CN
Ddx31	44.6217	0.284476	0.174914	1.62638	0.10387	0.682798	CA-CN
Zfyve26	257.776	-0.265122	0.163449	-1.62205	0.104793	0.682798	CA-CN
Tmf1	206.193	-0.272206	0.165824	-1.64154	0.100686	0.682798	CA-CN
Dennd2d	144.909	-0.241461	0.150366	-1.60582	0.108313	0.682798	CA-CN
Rbm33	558.608	-0.254011	0.15685	-1.61945	0.105351	0.682798	CA-CN
1700020D05Rik	5.30288	-0.26724	0.166142	-1.60851	0.107724	0.682798	CA-CN
Chrac1	200.907	0.249735	0.1533	1.62906	0.1033	0.682798	CA-CN
Tep1	572.924	-0.171908	0.105457	-1.63013	0.103074	0.682798	CA-CN
Atp6v0b	781.548	0.25412	0.158751	1.60075	0.109433	0.682798	CA-CN
Mrpl3	92.2225	0.263318	0.161851	1.62692	0.103754	0.682798	CA-CN
Drap1	262.715	0.260313	0.158367	1.64373	0.100232	0.682798	CA-CN
Spr	88.0714	0.265257	0.162276	1.63461	0.102131	0.682798	CA-CN
Mrfap1	255.119	0.223112	0.137682	1.62049	0.105127	0.682798	CA-CN
Cnot1	720.728	-0.302651	0.186978	-1.61864	0.105524	0.682798	CA-CN
Gm16287	18.6411	-0.310675	0.19292	-1.61039	0.107313	0.682798	CA-CN
Cyp4f18	2299.56	0.218083	0.134906	1.61656	0.105973	0.682798	CA-CN
Thoc5	183.446	0.231359	0.140641	1.64503	0.0999627	0.682798	CA-CN
Rbm27	272.157	-0.244578	0.148858	-1.64302	0.100378	0.682798	CA-CN
Lipo3	24.7202	-0.310491	0.191124	-1.62455	0.104258	0.682798	CA-CN
Cntln	33.7413	-0.30254	0.1852	-1.63359	0.102346	0.682798	CA-CN
Dtx3l	944.803	-0.282704	0.172544	-1.63845	0.101328	0.682798	CA-CN
Setd5	513.945	-0.247808	0.150152	-1.65038	0.0988652	0.682798	CA-CN
Bckdha	234.661	0.257966	0.159485	1.6175	0.10577	0.682798	CA-CN
Cbarp	25.6286	0.308425	0.191232	1.61283	0.106781	0.682798	CA-CN
Chsy1	240.776	0.247932	0.149784	1.65526	0.0978719	0.682798	CA-CN
Grpel1	152.564	0.264596	0.160808	1.64541	0.0998852	0.682798	CA-CN
Terf2	98.422	0.253651	0.1543	1.64388	0.1002	0.682798	CA-CN
Ostf1	1240.26	0.202235	0.124265	1.62744	0.103643	0.682798	CA-CN
Rab24	101.022	0.295237	0.179792	1.6421	0.100569	0.682798	CA-CN
Rpl30	202.104	0.274014	0.167482	1.63609	0.101821	0.682798	CA-CN
Mthfsl	41.3318	0.287114	0.177221	1.62009	0.105213	0.682798	CA-CN
Trak2	292.812	-0.251352	0.152298	-1.65039	0.0988626	0.682798	CA-CN
Pan2	249.726	-0.224106	0.137763	-1.62675	0.103789	0.682798	CA-CN
Pink1	317.127	0.25265	0.153291	1.64818	0.0993166	0.682798	CA-CN
Mrpl9	131.897	0.252244	0.155279	1.62445	0.10428	0.682798	CA-CN
C330027C09Rik	19.9708	-0.312978	0.191418	-1.63505	0.102039	0.682798	CA-CN
Hipk2	99.4953	-0.302846	0.185665	-1.63114	0.102861	0.682798	CA-CN
Mtcp1	14.6246	-0.321274	0.193941	-1.65656	0.0976081	0.682798	CA-CN
Cebpg	487.537	-0.218038	0.134673	-1.61902	0.105443	0.682798	CA-CN
Cib2	7.29939	0.282357	0.172885	1.63321	0.102425	0.682798	CA-CN
Aida	146.96	-0.241094	0.148137	-1.62751	0.103628	0.682798	CA-CN
Rprd2	471.727	-0.258807	0.160225	-1.61527	0.106252	0.682798	CA-CN
Csnk2b	433.154	0.245313	0.153177	1.6015	0.109266	0.682798	CA-CN
Renbp	48.926	0.303289	0.185465	1.63529	0.101987	0.682798	CA-CN
Fndc3a	796.428	-0.270661	0.165481	-1.63559	0.101924	0.682798	CA-CN
Ppm1g	434.566	0.189483	0.117685	1.61009	0.107379	0.682798	CA-CN
Eps15l1	389.128	-0.237889	0.144155	-1.65023	0.0988956	0.682798	CA-CN
Dock10	900.198	-0.29703	0.179359	-1.65606	0.0977098	0.682798	CA-CN
Eml6	112.294	-0.286577	0.1736	-1.65079	0.0987823	0.682798	CA-CN
Ccdc61	60.9203	0.274879	0.168759	1.62883	0.10335	0.682798	CA-CN
Rbm17	136.936	0.258697	0.161615	1.6007	0.109443	0.682798	CA-CN
Scaf8	267.078	-0.243391	0.151437	-1.60721	0.108008	0.682798	CA-CN
Kat6a	902.648	-0.293781	0.181326	-1.62018	0.105193	0.682798	CA-CN
Zfp101	35.1283	-0.305355	0.186772	-1.6349	0.102069	0.682798	CA-CN
Chmp1a	407.98	0.213961	0.133785	1.59929	0.109756	0.683161	CA-CN
Kif9	16.6429	0.309372	0.193438	1.59933	0.109747	0.683161	CA-CN
Stk19	36.1921	0.29205	0.182581	1.59956	0.109695	0.683161	CA-CN
Nectin4	39.5294	0.291164	0.182445	1.5959	0.110511	0.683871	CA-CN
Grhpr	8.38237	0.290923	0.182136	1.59729	0.110202	0.683871	CA-CN
Calr	2407.58	0.198379	0.124377	1.59498	0.110716	0.683871	CA-CN
Zfp780b	46.6926	-0.296334	0.185727	-1.59554	0.110592	0.683871	CA-CN
Gfpt1	691.656	-0.264556	0.165974	-1.59396	0.110945	0.683871	CA-CN
Ncoa1	600.572	-0.224036	0.140533	-1.59419	0.110894	0.683871	CA-CN
Srek1ip1	68.9748	0.284077	0.178082	1.5952	0.110667	0.683871	CA-CN
Irs2	52.0853	-0.309153	0.194018	-1.59343	0.111064	0.683871	CA-CN
Kif1b	140.016	-0.282941	0.177587	-1.59326	0.111102	0.683871	CA-CN
Dtx3	82.2453	0.272286	0.170362	1.59828	0.109981	0.683871	CA-CN
R3hdm2	441.987	-0.201582	0.126231	-1.59693	0.110281	0.683871	CA-CN
Clvs1	87.8988	0.251494	0.157889	1.59285	0.111193	0.683871	CA-CN
Timm22	65.7044	0.263679	0.165521	1.59302	0.111155	0.683871	CA-CN
Ahcyl2	218.759	-0.266551	0.167216	-1.59405	0.110925	0.683871	CA-CN
Arhgap9	1248.36	0.21335	0.133595	1.59698	0.110269	0.683871	CA-CN
4833420G17Rik	361.815	-0.208448	0.13073	-1.59449	0.110827	0.683871	CA-CN
Ccdc59	60.652	0.268903	0.168543	1.59545	0.110611	0.683871	CA-CN
Stap1	736.122	-0.234595	0.14725	-1.59318	0.11112	0.683871	CA-CN
Irf3	342.606	0.225634	0.141284	1.59702	0.110261	0.683871	CA-CN
Rnf19a	104.053	-0.23265	0.146505	-1.588	0.112287	0.685574	CA-CN
Magoh	106.609	0.286347	0.18033	1.5879	0.112308	0.685574	CA-CN
Hdhd2	54.3132	0.266689	0.167806	1.58927	0.111999	0.685574	CA-CN
Bst2	133.138	0.264592	0.16652	1.58895	0.112071	0.685574	CA-CN
Vps72	133.89	0.254159	0.160041	1.58809	0.112267	0.685574	CA-CN
Xpnpep3	100.197	-0.272411	0.171412	-1.58921	0.112013	0.685574	CA-CN
Zbtb14	76.0772	-0.284464	0.179068	-1.58858	0.112155	0.685574	CA-CN
Gsap	999.594	-0.208043	0.13083	-1.59018	0.111795	0.685574	CA-CN
Nsun5	122.177	0.252579	0.158783	1.59072	0.111673	0.685574	CA-CN
H2-Q4	836.204	-0.21743	0.136844	-1.58889	0.112086	0.685574	CA-CN
Arhgap27os3	123.891	-0.273132	0.171804	-1.58979	0.111883	0.685574	CA-CN
Wnk1	1092.91	-0.276561	0.174114	-1.58839	0.112199	0.685574	CA-CN
Rpl9	6.296	0.272197	0.172812	1.5751	0.115233	0.687028	CA-CN
Slc25a39	239.704	0.245524	0.155827	1.57562	0.115114	0.687028	CA-CN
Fam132a	13.2059	0.301613	0.191945	1.57136	0.1161	0.687028	CA-CN
Inafm1	92.1912	0.292933	0.185549	1.57873	0.114397	0.687028	CA-CN
Smu1	353.249	0.182673	0.116246	1.57143	0.116083	0.687028	CA-CN
Xab2	395.716	0.182766	0.116062	1.57474	0.115317	0.687028	CA-CN
Sdccag3	394.271	0.173649	0.11047	1.57191	0.115972	0.687028	CA-CN
Sptbn1	733.753	-0.291265	0.1847	-1.57696	0.114805	0.687028	CA-CN
Slc25a11	486.215	0.235977	0.148921	1.58458	0.113063	0.687028	CA-CN
Cdc37l1	155.149	-0.272344	0.173146	-1.57292	0.115737	0.687028	CA-CN
Pde8a	92.25	-0.297796	0.189076	-1.57501	0.115255	0.687028	CA-CN
Ugt1a6b	479.705	0.205542	0.129795	1.58358	0.113288	0.687028	CA-CN
Tsr2	45.7076	0.282111	0.178015	1.58475	0.113022	0.687028	CA-CN
Dopey2	240.645	-0.23409	0.148578	-1.57553	0.115133	0.687028	CA-CN
Fut4	258.869	0.257488	0.163047	1.57923	0.114284	0.687028	CA-CN
Acadm	90.458	0.260653	0.165837	1.57175	0.116009	0.687028	CA-CN
Hcfc1	771.28	-0.261247	0.166492	-1.56913	0.116618	0.687028	CA-CN
Lrpap1	252.068	0.202372	0.128544	1.57435	0.115407	0.687028	CA-CN
H60b	6.26291	0.276859	0.176501	1.5686	0.116742	0.687028	CA-CN
Pomgnt1	87.6069	0.241159	0.152725	1.57904	0.114327	0.687028	CA-CN
Mrpl46	46.0245	0.285767	0.181222	1.57689	0.11482	0.687028	CA-CN
Taf11	73.2704	0.27063	0.171004	1.5826	0.113514	0.687028	CA-CN
Ugt1a6a	484.032	0.209035	0.132365	1.57923	0.114282	0.687028	CA-CN
Cby1	13.7608	0.304546	0.194003	1.5698	0.116462	0.687028	CA-CN
Tomm6os	83.2495	0.289753	0.184685	1.5689	0.11667	0.687028	CA-CN
Chst15	219.911	-0.264405	0.168231	-1.57168	0.116026	0.687028	CA-CN
Vmp1	757.59	0.245971	0.156679	1.5699	0.116439	0.687028	CA-CN
Idh3a	115.604	0.246909	0.155967	1.58309	0.1134	0.687028	CA-CN
Gss	174.764	0.259804	0.164297	1.58131	0.113808	0.687028	CA-CN
Pgam2	20.6683	-0.302751	0.192791	-1.57036	0.116332	0.687028	CA-CN
Eif4h	1153.8	0.170438	0.107844	1.58042	0.114011	0.687028	CA-CN
Zmym2	204.068	-0.221772	0.141132	-1.57138	0.116094	0.687028	CA-CN
B230354K17Rik	35.5929	-0.300764	0.190262	-1.58079	0.113927	0.687028	CA-CN
Stx6	241.094	0.211397	0.134325	1.57377	0.11554	0.687028	CA-CN
Rps6ka4	355.036	0.211015	0.133956	1.57526	0.115197	0.687028	CA-CN
Atf6b	523.435	0.194942	0.124203	1.56954	0.116522	0.687028	CA-CN
Lmbrd2	36.0118	-0.233391	0.148437	-1.57232	0.115876	0.687028	CA-CN
Zfp593	40.5882	0.297621	0.188786	1.5765	0.114911	0.687028	CA-CN
Ahdc1	76.7657	0.275917	0.175979	1.5679	0.116905	0.687028	CA-CN
Ccdc124	155.55	0.260945	0.166154	1.5705	0.116299	0.687028	CA-CN
Zbtb38	59.642	-0.305944	0.194107	-1.57617	0.114987	0.687028	CA-CN
Mier2	43.7319	-0.287174	0.182805	-1.57093	0.116199	0.687028	CA-CN
Fgl2	87.6644	-0.303209	0.191172	-1.58606	0.112726	0.687028	CA-CN
Rel	220.256	-0.279876	0.176968	-1.58151	0.113761	0.687028	CA-CN
Cast	409.427	-0.266343	0.169836	-1.56824	0.116825	0.687028	CA-CN
Mirt1	247.491	-0.27424	0.174178	-1.57449	0.115375	0.687028	CA-CN
Larp1b	35.2193	0.300878	0.189659	1.58642	0.112645	0.687028	CA-CN
Ddx28	107.181	0.269551	0.170106	1.58461	0.113055	0.687028	CA-CN
Cdk4	186.661	0.210988	0.134478	1.56895	0.11666	0.687028	CA-CN
Gtf2h1	128.166	0.214266	0.136215	1.573	0.115719	0.687028	CA-CN
Mllt10	277.433	-0.242064	0.153303	-1.57899	0.114338	0.687028	CA-CN
Vars2	47.9912	0.287719	0.182044	1.5805	0.113993	0.687028	CA-CN
1700037H04Rik	35.3686	0.295292	0.187042	1.57875	0.114394	0.687028	CA-CN
Klhl24	588.906	-0.295968	0.188728	-1.56822	0.116829	0.687028	CA-CN
Itpripl2	443.85	-0.257157	0.163128	-1.57642	0.11493	0.687028	CA-CN
Eef2kmt	119.623	0.254724	0.160872	1.5834	0.113331	0.687028	CA-CN
Wdr26	1725.23	-0.231129	0.145959	-1.58352	0.113304	0.687028	CA-CN
Srsf5	449.822	0.22962	0.145058	1.58295	0.113432	0.687028	CA-CN
Adk	20.6128	0.30365	0.193193	1.57175	0.116009	0.687028	CA-CN
Kdm6a	324.403	-0.289557	0.183363	-1.57914	0.114303	0.687028	CA-CN
Pdzd8	340.562	-0.277044	0.176721	-1.56769	0.116953	0.687028	CA-CN
Pigf	127.351	-0.236255	0.149008	-1.58552	0.112849	0.687028	CA-CN
Rps6kb1	158.047	-0.221087	0.139913	-1.58018	0.114065	0.687028	CA-CN
Pnpla6	134.157	-0.248572	0.158653	-1.56676	0.117171	0.687897	CA-CN
S1pr2	92.5453	0.285757	0.182547	1.56539	0.117492	0.688545	CA-CN
Sik2	96.5907	-0.303668	0.194063	-1.56479	0.117632	0.688545	CA-CN
Zkscan3	132.245	-0.214532	0.13702	-1.5657	0.117418	0.688545	CA-CN
Zdhhc6	445.74	0.167469	0.107015	1.5649	0.117605	0.688545	CA-CN
Ints8	124.912	-0.241036	0.154033	-1.56484	0.117621	0.688545	CA-CN
Vps26b	379.263	-0.221018	0.141356	-1.56356	0.117921	0.689419	CA-CN
Cenpj	33.8703	-0.290369	0.1857	-1.56365	0.1179	0.689419	CA-CN
Pik3r6	186.906	-0.195791	0.125304	-1.56253	0.118164	0.690011	CA-CN
1700120C14Rik	7.61915	0.269993	0.173155	1.55926	0.118936	0.690011	CA-CN
Rev3l	78.3283	-0.296554	0.190023	-1.56063	0.118612	0.690011	CA-CN
Cfh	340.387	-0.225368	0.144349	-1.56128	0.118458	0.690011	CA-CN
Zfp322a	88.1363	-0.267615	0.171507	-1.56037	0.118672	0.690011	CA-CN
Cox5b	68.9995	0.27686	0.177507	1.55971	0.118828	0.690011	CA-CN
Zmpste24	149.91	-0.249739	0.16012	-1.5597	0.118832	0.690011	CA-CN
Zc3h8	24.9244	0.298646	0.191148	1.56238	0.118199	0.690011	CA-CN
Atp13a3	402.703	-0.283708	0.181705	-1.56137	0.118437	0.690011	CA-CN
Gm13498	18.6247	-0.30228	0.193846	-1.55938	0.118906	0.690011	CA-CN
Gm17745	3.53713	-0.241991	0.15499	-1.56133	0.118446	0.690011	CA-CN
Lmbrd1	489.004	-0.185794	0.119116	-1.55977	0.118814	0.690011	CA-CN
Gm21057	7.34636	-0.256917	0.164712	-1.5598	0.118808	0.690011	CA-CN
Actr10	215.86	0.229605	0.14731	1.55865	0.119079	0.690434	CA-CN
Snx4	158.947	0.202648	0.130064	1.55806	0.11922	0.690843	CA-CN
Mroh2a	115.577	0.252893	0.162544	1.55584	0.119745	0.691231	CA-CN
Dync1h1	1762.16	-0.232999	0.14977	-1.55571	0.119777	0.691231	CA-CN
Pip4k2b	258.854	-0.220952	0.141911	-1.55697	0.119477	0.691231	CA-CN
Wdr53	36.5917	0.295843	0.189962	1.55738	0.119381	0.691231	CA-CN
Dctn2	477.536	0.203709	0.130919	1.556	0.119709	0.691231	CA-CN
Rnf111	484.826	-0.239598	0.154013	-1.5557	0.11978	0.691231	CA-CN
Qser1	193.114	-0.277133	0.178102	-1.55603	0.119701	0.691231	CA-CN
Asb13	80.8478	-0.252441	0.16232	-1.55521	0.119897	0.691501	CA-CN
Nab2	64.1429	-0.295581	0.190163	-1.55436	0.120099	0.691977	CA-CN
Mmp19	20.0478	0.300464	0.193352	1.55397	0.120191	0.691977	CA-CN
Npepl1	325.962	0.220906	0.142153	1.554	0.120185	0.691977	CA-CN
Ppat	86.4203	-0.27349	0.176062	-1.55337	0.120334	0.69211	CA-CN
Kpna4	1149.8	-0.197474	0.127133	-1.55329	0.120355	0.69211	CA-CN
Rbm26	154.65	-0.262059	0.168886	-1.5517	0.120735	0.692165	CA-CN
Trappc2l	81.4255	0.276778	0.178378	1.55164	0.120749	0.692165	CA-CN
Gpatch4	12.4918	0.294707	0.189988	1.55118	0.120858	0.692165	CA-CN
Scaf11	530.311	-0.236113	0.152198	-1.55135	0.120817	0.692165	CA-CN
Snrnp35	18.3644	-0.30129	0.194181	-1.55159	0.12076	0.692165	CA-CN
Trnau1ap	119.195	0.25336	0.16328	1.55169	0.120736	0.692165	CA-CN
Apba3	92.2221	0.243353	0.156863	1.55138	0.120811	0.692165	CA-CN
Arid4b	145.457	-0.284881	0.184029	-1.54802	0.121617	0.692639	CA-CN
Rsl24d1	110.292	0.249009	0.160893	1.54767	0.121701	0.692639	CA-CN
Phf8	284.545	-0.267356	0.172461	-1.55024	0.121085	0.692639	CA-CN
Plrg1	174.407	0.232427	0.150084	1.54865	0.121466	0.692639	CA-CN
D8Ertd738e	321.675	0.25764	0.166313	1.54913	0.12135	0.692639	CA-CN
Rpl27a	56.9231	0.261279	0.168891	1.54703	0.121857	0.692639	CA-CN
4930503L19Rik	24.916	-0.299527	0.193301	-1.54953	0.121253	0.692639	CA-CN
Mylip	212.039	-0.219626	0.141942	-1.54729	0.121793	0.692639	CA-CN
Smim1	127.21	0.275501	0.177715	1.55025	0.121083	0.692639	CA-CN
Dad1	377.586	0.246907	0.159476	1.54824	0.121564	0.692639	CA-CN
Cdc34	141.708	0.269198	0.173989	1.54722	0.121811	0.692639	CA-CN
Mfap3	562.975	-0.235367	0.152119	-1.54726	0.121801	0.692639	CA-CN
Nup98	560.147	-0.251111	0.162156	-1.54857	0.121484	0.692639	CA-CN
Dock4	76.0373	-0.299178	0.193972	-1.54238	0.122982	0.694614	CA-CN
Wdfy2	72.4183	-0.298154	0.193079	-1.54421	0.122537	0.694614	CA-CN
Lman2	983.108	0.151968	0.0984163	1.54413	0.122556	0.694614	CA-CN
Rock2	320.587	-0.264027	0.171175	-1.54244	0.122967	0.694614	CA-CN
Itpr3	159.551	-0.253222	0.164009	-1.54396	0.122599	0.694614	CA-CN
Chm	128.218	-0.274728	0.177959	-1.54377	0.122644	0.694614	CA-CN
Gm20300	33.6531	-0.288458	0.186723	-1.54485	0.122383	0.694614	CA-CN
Ankrd17	561.977	-0.164578	0.106631	-1.54343	0.122726	0.694614	CA-CN
Anxa1	569.054	-0.25705	0.166607	-1.54286	0.122866	0.694614	CA-CN
Mrpl57	82.8643	0.238574	0.154658	1.5426	0.122929	0.694614	CA-CN
Kctd1	14.9569	0.299067	0.193678	1.54415	0.122553	0.694614	CA-CN
Zc3h6	38.0407	0.293869	0.190701	1.541	0.123318	0.695707	CA-CN
Zscan29	150.383	-0.21276	0.138051	-1.54117	0.123275	0.695707	CA-CN
Fcgr1	305.95	0.256086	0.166313	1.53978	0.123613	0.696393	CA-CN
1700020L24Rik	9.47898	0.271943	0.176629	1.53962	0.123652	0.696393	CA-CN
Fuca1	433.413	0.198959	0.129201	1.53992	0.123579	0.696393	CA-CN
Cdc42se1	1662.69	0.168229	0.109304	1.5391	0.12378	0.696716	CA-CN
Oat	284.081	0.205171	0.13339	1.53813	0.124017	0.697497	CA-CN
Cmtr1	456.742	-0.186582	0.121342	-1.53766	0.124132	0.697497	CA-CN
Fundc2	50.429	0.289928	0.188544	1.53772	0.124117	0.697497	CA-CN
Il1rn	77.6692	0.273676	0.178086	1.53677	0.124351	0.698326	CA-CN
Zfp1	23.5961	-0.295919	0.192999	-1.53327	0.125211	0.699494	CA-CN
2008-09-01	26.7871	-0.296679	0.193398	-1.53403	0.125023	0.699494	CA-CN
Kdm2a	756.718	-0.22481	0.146708	-1.53237	0.125432	0.699494	CA-CN
Cradd	35.2602	0.280607	0.18306	1.53287	0.125309	0.699494	CA-CN
Rlf	177.789	-0.246118	0.16038	-1.5346	0.124883	0.699494	CA-CN
2610001J05Rik	163.054	0.227328	0.148371	1.53216	0.125483	0.699494	CA-CN
Trim56	115.96	-0.278509	0.181757	-1.53232	0.125444	0.699494	CA-CN
Dpy19l4	32.4779	-0.294092	0.191743	-1.53379	0.125082	0.699494	CA-CN
Clasp1	146.991	-0.255468	0.166623	-1.53321	0.125224	0.699494	CA-CN
Tacc3	75.1459	-0.255555	0.166795	-1.53215	0.125485	0.699494	CA-CN
Abhd17a	209.211	0.24051	0.157005	1.53187	0.125556	0.699494	CA-CN
Chil3	162.244	-0.225966	0.147343	-1.5336	0.125127	0.699494	CA-CN
Ankrd46	96.4785	0.225972	0.147291	1.53419	0.124984	0.699494	CA-CN
Fcho2	821.67	-0.277329	0.18079	-1.53399	0.125033	0.699494	CA-CN
Lpar5	93.7831	-0.275828	0.180198	-1.5307	0.125845	0.699517	CA-CN
0610039K10Rik	135.314	-0.285617	0.186542	-1.53111	0.125741	0.699517	CA-CN
Fam209	3.23992	0.211845	0.138324	1.53151	0.125645	0.699517	CA-CN
Timm50	98.1324	0.262743	0.171629	1.53088	0.125799	0.699517	CA-CN
Ifi35	233.406	0.244143	0.159613	1.52959	0.126119	0.699721	CA-CN
Rps5	1822.39	0.220585	0.144195	1.52978	0.126072	0.699721	CA-CN
L3mbtl2	159.259	0.216833	0.141777	1.5294	0.126166	0.699721	CA-CN
Cd9	1292.73	-0.214836	0.140467	-1.52943	0.126157	0.699721	CA-CN
Cfap45	7.76987	-0.274666	0.179733	-1.52819	0.126465	0.699798	CA-CN
Dennd2c	30.4908	-0.290372	0.189906	-1.52903	0.126256	0.699798	CA-CN
Hist1h1c	42.0595	0.285005	0.186445	1.52862	0.126358	0.699798	CA-CN
St3gal6	26.8189	-0.294122	0.192447	-1.52833	0.126432	0.699798	CA-CN
Fkbp7	7.19941	0.268689	0.17596	1.52699	0.126764	0.701056	CA-CN
Fdft1	502.311	0.246199	0.161268	1.52664	0.12685	0.701139	CA-CN
Cmpk2	172.596	-0.243378	0.159496	-1.52592	0.127029	0.70143	CA-CN
Zfp729a	64.3148	-0.273408	0.179184	-1.52586	0.127046	0.70143	CA-CN
Atxn3	274.907	-0.252997	0.166266	-1.52164	0.128099	0.702026	CA-CN
Dyrk1b	26.3629	-0.289919	0.190497	-1.52191	0.128033	0.702026	CA-CN
Arid3a	652.577	-0.207948	0.136365	-1.52494	0.127275	0.702026	CA-CN
Rsbn1l	346.56	-0.226533	0.148682	-1.5236	0.127608	0.702026	CA-CN
Foxp1	1045.48	0.210463	0.138332	1.52143	0.128151	0.702026	CA-CN
BC004004	232.89	0.229437	0.15071	1.52238	0.127914	0.702026	CA-CN
Rfc1	213.649	-0.229476	0.150509	-1.52467	0.127342	0.702026	CA-CN
Hnrnph2	160.332	-0.215247	0.141371	-1.52257	0.127867	0.702026	CA-CN
Dram2	516.629	-0.185098	0.121654	-1.52151	0.128132	0.702026	CA-CN
Fibp	185.82	0.249988	0.164013	1.5242	0.12746	0.702026	CA-CN
Phf7	62.2381	0.256421	0.168541	1.52142	0.128154	0.702026	CA-CN
Azi2	295.438	-0.200298	0.131432	-1.52397	0.127517	0.702026	CA-CN
Yme1l1	428.862	-0.205167	0.134771	-1.52234	0.127925	0.702026	CA-CN
Spice1	74.0469	-0.270294	0.177495	-1.52283	0.127802	0.702026	CA-CN
Zfp180	172.755	-0.214779	0.141278	-1.52025	0.128447	0.702028	CA-CN
Xpo1	498.393	-0.21854	0.143683	-1.52099	0.128263	0.702028	CA-CN
Zfp65	51.1109	-0.282346	0.185696	-1.52048	0.128391	0.702028	CA-CN
Zfp260	102.729	-0.239583	0.157709	-1.51914	0.128727	0.702028	CA-CN
E130112N10Rik	22.458	-0.289128	0.190221	-1.51996	0.128521	0.702028	CA-CN
Kctd13	101.468	0.229218	0.150882	1.51919	0.128716	0.702028	CA-CN
Sertad1	83.978	0.254392	0.167397	1.5197	0.128587	0.702028	CA-CN
Myo9b	1306.81	-0.193732	0.127445	-1.52011	0.128482	0.702028	CA-CN
Ctnnbl1	143.925	0.225633	0.14985	1.50572	0.132139	0.702658	CA-CN
Elk3	738.394	0.171855	0.113508	1.51404	0.130017	0.702658	CA-CN
Etv5	20.7685	-0.290732	0.193352	-1.50364	0.132675	0.702658	CA-CN
Unkl	25.341	-0.290825	0.191687	-1.51719	0.129219	0.702658	CA-CN
Ston2	107.196	-0.285847	0.18969	-1.50692	0.131832	0.702658	CA-CN
Usp32	665.755	-0.250825	0.166071	-1.51034	0.130956	0.702658	CA-CN
Clec4e	485.405	-0.232595	0.154824	-1.50232	0.133014	0.702658	CA-CN
Tbck	155.434	-0.2297	0.152508	-1.50615	0.132028	0.702658	CA-CN
Psip1	136.966	-0.237471	0.158011	-1.50287	0.132871	0.702658	CA-CN
Rfx7	194.848	-0.276466	0.183103	-1.5099	0.13107	0.702658	CA-CN
Acat2	46.1644	-0.286245	0.190605	-1.50177	0.133158	0.702658	CA-CN
Txnl4b	50.2092	0.282025	0.186174	1.51485	0.129811	0.702658	CA-CN
5730408K05Rik	5.48185	0.259331	0.172773	1.501	0.133356	0.702658	CA-CN
Acadvl	196.014	0.220864	0.146191	1.51079	0.130841	0.702658	CA-CN
Fam219a	71.0147	-0.248722	0.164502	-1.51197	0.130541	0.702658	CA-CN
Mon2	334.437	-0.254974	0.168619	-1.51213	0.130501	0.702658	CA-CN
Nemf	181.5	-0.232639	0.154424	-1.50649	0.131941	0.702658	CA-CN
Zswim8	461.709	-0.22154	0.146839	-1.50872	0.131369	0.702658	CA-CN
Atp6v1g1	62.7668	0.259046	0.171936	1.50664	0.131902	0.702658	CA-CN
Ctsz	1771.28	0.205699	0.13708	1.50058	0.133465	0.702658	CA-CN
Limd2	2492.43	0.20489	0.135478	1.51235	0.130445	0.702658	CA-CN
Thoc1	172.765	-0.230885	0.153499	-1.50415	0.132543	0.702658	CA-CN
Gtpbp3	60.4796	0.247168	0.164544	1.50214	0.133061	0.702658	CA-CN
Nabp1	1760.46	-0.190289	0.125617	-1.51484	0.129813	0.702658	CA-CN
Cd86	134.381	-0.238591	0.158263	-1.50755	0.131669	0.702658	CA-CN
Nrm	248.937	0.209062	0.138963	1.50444	0.132468	0.702658	CA-CN
Lonrf1	142.364	-0.237414	0.157605	-1.50638	0.131969	0.702658	CA-CN
Thap12	118.157	-0.254219	0.167734	-1.51561	0.129617	0.702658	CA-CN
Sertad3	60.8515	0.270446	0.178547	1.5147	0.129848	0.702658	CA-CN
Plcb2	338.221	-0.212161	0.141169	-1.50288	0.13287	0.702658	CA-CN
Anxa4	134.667	0.227659	0.151431	1.50339	0.132739	0.702658	CA-CN
Rfx3	60.8676	-0.269488	0.177647	-1.51698	0.12927	0.702658	CA-CN
Wasf2	1159.12	-0.272188	0.181352	-1.50088	0.133387	0.702658	CA-CN
Sfpq	798.122	-0.176149	0.116018	-1.51829	0.128941	0.702658	CA-CN
Mxd1	96.5132	-0.281565	0.185928	-1.51438	0.12993	0.702658	CA-CN
Tmem179b	368.24	0.222114	0.147946	1.50132	0.133274	0.702658	CA-CN
Sntb2	66.2589	-0.28706	0.190441	-1.50734	0.131724	0.702658	CA-CN
Disp1	55.6665	-0.264496	0.176011	-1.50272	0.132911	0.702658	CA-CN
Pdf	83.2432	0.244357	0.162665	1.50222	0.133041	0.702658	CA-CN
C130050O18Rik	587.043	0.231386	0.152728	1.51502	0.129768	0.702658	CA-CN
9130011E15Rik	68.1068	0.243947	0.161701	1.50863	0.131393	0.702658	CA-CN
Psma7	491.656	0.234264	0.154481	1.51646	0.129403	0.702658	CA-CN
Kctd17	42.2554	0.285844	0.190503	1.50047	0.133492	0.702658	CA-CN
Ubr3	335.303	-0.261597	0.172866	-1.5133	0.130204	0.702658	CA-CN
Gadd45gip1	193.652	0.244716	0.162928	1.50199	0.133099	0.702658	CA-CN
Zbtb22	211.453	0.199962	0.132029	1.51453	0.129893	0.702658	CA-CN
Efcab14	226.268	-0.230812	0.153121	-1.50739	0.131712	0.702658	CA-CN
Naa15	240.619	-0.191402	0.12754	-1.50072	0.133428	0.702658	CA-CN
Dmap1	64.7062	0.261574	0.174036	1.50299	0.132842	0.702658	CA-CN
Gdap10	13.0666	-0.255098	0.168413	-1.51472	0.129843	0.702658	CA-CN
Dyrk1a	380.885	-0.201654	0.133681	-1.50848	0.131432	0.702658	CA-CN
Spc25	8.72144	-0.271404	0.180687	-1.50207	0.133079	0.702658	CA-CN
Fam173a	92.4044	0.266744	0.176745	1.5092	0.131247	0.702658	CA-CN
Trp53inp1	178.268	-0.286874	0.189683	-1.51239	0.130436	0.702658	CA-CN
Slc39a7	457.738	0.1972	0.130789	1.50777	0.131613	0.702658	CA-CN
Tmem9b	289.045	0.216677	0.143173	1.5134	0.130179	0.702658	CA-CN
Ddx24	490.037	0.187399	0.124445	1.50588	0.132098	0.702658	CA-CN
Fpgt	83.5773	-0.276602	0.184	-1.50327	0.13277	0.702658	CA-CN
Napg	518.141	-0.194635	0.128368	-1.51622	0.129463	0.702658	CA-CN
Yrdc	80.282	0.235412	0.156139	1.5077	0.131631	0.702658	CA-CN
Gm19557	16.3577	-0.290792	0.193103	-1.50589	0.132094	0.702658	CA-CN
Socs5	130.556	-0.233283	0.154625	-1.5087	0.131375	0.702658	CA-CN
Fam35a	48.167	-0.272243	0.180298	-1.50996	0.131053	0.702658	CA-CN
Yipf6	147.434	-0.220096	0.146662	-1.5007	0.133433	0.702658	CA-CN
Atp5g3	343.533	0.242298	0.160428	1.51033	0.13096	0.702658	CA-CN
Nxt1	84.4065	0.26614	0.177461	1.49971	0.13369	0.70332	CA-CN
Edrf1	113.121	-0.245925	0.166478	-1.47723	0.139615	0.70336	CA-CN
Timm8a1	6.32707	0.251484	0.169918	1.48003	0.138865	0.70336	CA-CN
Pkn2	213.1	-0.229508	0.157582	-1.45643	0.145273	0.70336	CA-CN
Mtif3	201.426	0.245345	0.16459	1.49064	0.136055	0.70336	CA-CN
Zmat5	91.0439	0.263142	0.180635	1.45676	0.145182	0.70336	CA-CN
Pggt1b	49.0716	-0.285846	0.193371	-1.47822	0.139348	0.70336	CA-CN
Pds5b	145.171	-0.246476	0.16634	-1.48176	0.138405	0.70336	CA-CN
Snhg1	29.3903	0.281702	0.191872	1.46818	0.142056	0.70336	CA-CN
Il18bp	24.4371	-0.281575	0.193834	-1.45266	0.146318	0.70336	CA-CN
L3mbtl3	161.736	0.198233	0.133648	1.48324	0.13801	0.70336	CA-CN
Pias3	167.968	-0.203063	0.140435	-1.44596	0.14819	0.70336	CA-CN
Cltb	111.566	0.226681	0.156803	1.44564	0.148277	0.70336	CA-CN
Cep44	41.364	-0.267547	0.18217	-1.46867	0.141922	0.70336	CA-CN
Slc25a10	61.6445	0.259817	0.175546	1.48005	0.138861	0.70336	CA-CN
D16Ertd472e	68.7639	-0.279372	0.186692	-1.49643	0.13454	0.70336	CA-CN
Ssc4d	13.6801	0.283325	0.191947	1.47606	0.139927	0.70336	CA-CN
Snx1	668.092	0.166993	0.114876	1.45368	0.146036	0.70336	CA-CN
Xdh	2664.01	-0.213481	0.1464	-1.4582	0.144785	0.70336	CA-CN
Birc2	159.251	-0.207312	0.139137	-1.48999	0.136227	0.70336	CA-CN
Tmem8	212.988	0.193265	0.133598	1.44662	0.148003	0.70336	CA-CN
Trim35	186.216	0.218737	0.148132	1.47664	0.139773	0.70336	CA-CN
Hmg20b	164.457	0.244482	0.166682	1.46675	0.142443	0.70336	CA-CN
Ndufs2	421.049	0.172345	0.119136	1.44662	0.148004	0.70336	CA-CN
Suds3	286.281	0.19323	0.133169	1.45101	0.146777	0.70336	CA-CN
Cd2bp2	335.398	0.179395	0.121998	1.47048	0.141433	0.70336	CA-CN
Usp8	620.034	-0.201653	0.138127	-1.45991	0.144314	0.70336	CA-CN
D030056L22Rik	49.3762	0.265847	0.183166	1.4514	0.146669	0.70336	CA-CN
Wfs1	68.3901	0.230181	0.158762	1.44985	0.1471	0.70336	CA-CN
Gjb2	136.723	-0.227405	0.152583	-1.49037	0.136126	0.70336	CA-CN
Adam10	703.168	-0.229802	0.153413	-1.49793	0.134152	0.70336	CA-CN
Fbxo22	199.06	0.196522	0.132051	1.48822	0.136692	0.70336	CA-CN
Ndufa7	191.254	0.236441	0.158107	1.49545	0.134798	0.70336	CA-CN
Rps16	6.93848	0.261079	0.176186	1.48184	0.138383	0.70336	CA-CN
Rela	786.083	0.172813	0.116789	1.4797	0.138954	0.70336	CA-CN
Arl3	16.9939	0.283677	0.19418	1.4609	0.144043	0.70336	CA-CN
Asb6	143.781	0.224542	0.150388	1.49308	0.135416	0.70336	CA-CN
Skint3	779.284	-0.206923	0.138356	-1.49558	0.134762	0.70336	CA-CN
Rnasel	116.102	-0.247341	0.166901	-1.48196	0.138351	0.70336	CA-CN
Tmem11	81.0894	0.246652	0.168477	1.46401	0.143191	0.70336	CA-CN
Rassf4	2831.07	-0.241138	0.162261	-1.48611	0.137249	0.70336	CA-CN
Dock5	1727.44	-0.214499	0.144583	-1.48357	0.137923	0.70336	CA-CN
0610010K14Rik	91.8138	0.266684	0.181521	1.46916	0.14179	0.70336	CA-CN
Trappc8	367.692	-0.255997	0.172793	-1.48152	0.138468	0.70336	CA-CN
Ryr1	235.107	0.212503	0.14619	1.45361	0.146055	0.70336	CA-CN
Sfi1	357.555	-0.191682	0.131094	-1.46218	0.143693	0.70336	CA-CN
Ppp1r11	108.774	0.238084	0.163862	1.45295	0.146237	0.70336	CA-CN
Kri1	359.864	0.22581	0.151707	1.48846	0.13663	0.70336	CA-CN
Clip2	88.5236	-0.243133	0.167875	-1.4483	0.147534	0.70336	CA-CN
Naa16	93.6756	-0.241113	0.163857	-1.47148	0.141161	0.70336	CA-CN
Adgre4	7245.99	-0.1943	0.13169	-1.47543	0.140096	0.70336	CA-CN
Slc35c1	447.38	-0.199213	0.136591	-1.45846	0.144714	0.70336	CA-CN
Cyb5d1	3.80085	0.228166	0.153838	1.48315	0.138034	0.70336	CA-CN
Rbm12b2	75.5604	-0.229748	0.15665	-1.46663	0.142477	0.70336	CA-CN
Rita1	21.0495	0.287597	0.193994	1.48251	0.138205	0.70336	CA-CN
Rtfdc1	425.576	0.192822	0.130036	1.48283	0.13812	0.70336	CA-CN
Grb2	1041.58	0.163697	0.110126	1.48646	0.137157	0.70336	CA-CN
Polr2b	324.179	-0.196572	0.132971	-1.4783	0.139326	0.70336	CA-CN
Zbtb11os1	16.2892	-0.284771	0.19373	-1.46994	0.141578	0.70336	CA-CN
Hbp1	432.39	-0.19956	0.133617	-1.49353	0.135299	0.70336	CA-CN
Il6ra	1941.93	-0.188841	0.126081	-1.49777	0.134193	0.70336	CA-CN
Sap18	98.428	0.235499	0.162182	1.45206	0.146484	0.70336	CA-CN
Nudt1	28.9035	0.27545	0.190169	1.44845	0.147492	0.70336	CA-CN
Tmtc3	30.1717	-0.282998	0.193806	-1.46021	0.144231	0.70336	CA-CN
Ypel5	438.176	0.205148	0.139943	1.46594	0.142664	0.70336	CA-CN
Dexi	26.3795	-0.278351	0.190483	-1.46129	0.143936	0.70336	CA-CN
Sla2	345.962	0.234643	0.156984	1.4947	0.134994	0.70336	CA-CN
Mocs3	28.7634	0.281945	0.192168	1.46718	0.142326	0.70336	CA-CN
Usp24	447.057	-0.244683	0.167132	-1.46401	0.143191	0.70336	CA-CN
Sssca1	35.6304	0.268866	0.182414	1.47393	0.1405	0.70336	CA-CN
Grap	20.494	0.283235	0.192832	1.46881	0.141883	0.70336	CA-CN
Ext1	252.001	0.207085	0.138597	1.49415	0.135136	0.70336	CA-CN
Qk	700.296	-0.260909	0.177705	-1.46821	0.142047	0.70336	CA-CN
Glcci1	45.6637	-0.286957	0.19147	-1.49871	0.133949	0.70336	CA-CN
Rab9	48.9141	0.258277	0.175042	1.47552	0.140074	0.70336	CA-CN
Dlg3	20.66	0.285735	0.193437	1.47714	0.139637	0.70336	CA-CN
Hcst	109.173	0.269045	0.185172	1.45295	0.146239	0.70336	CA-CN
Nfu1	85.0957	0.259685	0.175171	1.48246	0.138217	0.70336	CA-CN
Psen2	116.27	0.224784	0.154866	1.45148	0.146648	0.70336	CA-CN
Itgav	1258.68	-0.248898	0.168123	-1.48045	0.138752	0.70336	CA-CN
Pih1d1	152.805	0.223713	0.154548	1.44753	0.147749	0.70336	CA-CN
Fam102b	172.365	-0.26355	0.176237	-1.49543	0.134801	0.70336	CA-CN
Cited2	226.33	0.211365	0.145894	1.44876	0.147406	0.70336	CA-CN
Ago2	333.746	-0.252117	0.173177	-1.45583	0.145439	0.70336	CA-CN
D17H6S56E-5	290.857	-0.235792	0.162276	-1.45303	0.146215	0.70336	CA-CN
Ugt1a7c	683.669	0.17391	0.119631	1.45373	0.146022	0.70336	CA-CN
Cabin1	413.129	-0.184903	0.127356	-1.45186	0.146541	0.70336	CA-CN
5830428M24Rik	26.4828	-0.281975	0.19417	-1.45221	0.146443	0.70336	CA-CN
Gm15987	340.234	0.190442	0.129295	1.47293	0.140769	0.70336	CA-CN
Tmem255a	36.8944	0.286451	0.192776	1.48592	0.137299	0.70336	CA-CN
Rps20	331.051	0.269962	0.180475	1.49584	0.134695	0.70336	CA-CN
Mrs2	64.9703	-0.285792	0.194187	-1.47173	0.141093	0.70336	CA-CN
Zfp358	36.6794	0.289448	0.193674	1.49451	0.135042	0.70336	CA-CN
Zfp36l1	648.961	-0.233426	0.158349	-1.47412	0.140448	0.70336	CA-CN
Zfp609	182.449	-0.247664	0.17091	-1.44909	0.147313	0.70336	CA-CN
Neu1	286.136	0.195736	0.131744	1.48574	0.137349	0.70336	CA-CN
2011-09-01	339.386	-0.196494	0.131476	-1.49453	0.135037	0.70336	CA-CN
Elovl6	37.9199	-0.279763	0.191503	-1.46088	0.144048	0.70336	CA-CN
Sike1	154.001	-0.221306	0.152118	-1.45483	0.145717	0.70336	CA-CN
Arl4d	8.9556	-0.268893	0.185913	-1.44634	0.148081	0.70336	CA-CN
Haghl	77.7927	0.250025	0.167282	1.49463	0.13501	0.70336	CA-CN
Zhx2	157.185	0.213246	0.14717	1.44898	0.147343	0.70336	CA-CN
Pum1	366.629	-0.225806	0.153043	-1.47544	0.140094	0.70336	CA-CN
Prdm1	45.8977	-0.287481	0.194147	-1.48074	0.138677	0.70336	CA-CN
Rbm14	198.187	-0.188981	0.130672	-1.44622	0.148116	0.70336	CA-CN
Clcn4	586.855	0.168297	0.115075	1.46249	0.143606	0.70336	CA-CN
Zfr	369.961	-0.224873	0.15123	-1.48696	0.137025	0.70336	CA-CN
Agmo	32.7523	-0.280625	0.192603	-1.45701	0.145114	0.70336	CA-CN
Mvk	18.5441	-0.28902	0.194169	-1.4885	0.13662	0.70336	CA-CN
Rgs18	45.6001	-0.274652	0.185057	-1.48415	0.137769	0.70336	CA-CN
Cfap97	87.0119	-0.243316	0.16776	-1.45038	0.146953	0.70336	CA-CN
Aqr	488.246	-0.23947	0.159832	-1.49827	0.134064	0.70336	CA-CN
Aes	1001.55	0.208955	0.143416	1.45698	0.145122	0.70336	CA-CN
Cotl1	3029.36	0.209889	0.141633	1.48192	0.138361	0.70336	CA-CN
Arhgef37	203.44	-0.275191	0.187658	-1.46645	0.142527	0.70336	CA-CN
R3hcc1	24.2453	0.278385	0.192401	1.4469	0.147924	0.70336	CA-CN
Uqcrh	280.395	0.270555	0.181331	1.49206	0.135684	0.70336	CA-CN
H2afx	73.9974	0.266785	0.183641	1.45275	0.146293	0.70336	CA-CN
S100a13	100.325	0.277599	0.189776	1.46277	0.14353	0.70336	CA-CN
Smim11	46.0012	0.282673	0.191097	1.47922	0.139082	0.70336	CA-CN
Uxs1	45.4691	0.262791	0.181413	1.44858	0.147454	0.70336	CA-CN
Ubl7	269.496	0.230241	0.157503	1.46182	0.14379	0.70336	CA-CN
Stag1	345.748	-0.235482	0.158362	-1.48699	0.137019	0.70336	CA-CN
Luzp1	129.033	-0.246939	0.166201	-1.48578	0.137336	0.70336	CA-CN
Yif1b	74.3224	0.273033	0.186553	1.46356	0.143313	0.70336	CA-CN
Dyrk2	104.87	-0.283885	0.191022	-1.48613	0.137244	0.70336	CA-CN
9930021J03Rik	142.571	-0.231451	0.155871	-1.48489	0.137574	0.70336	CA-CN
Capn15	224.338	-0.212874	0.143306	-1.48545	0.137425	0.70336	CA-CN
Zmynd8	370.127	-0.230545	0.158915	-1.45075	0.14685	0.70336	CA-CN
Cdc73	131.08	-0.249783	0.170176	-1.4678	0.142159	0.70336	CA-CN
Ndufb11	184.253	0.254351	0.173266	1.46797	0.142111	0.70336	CA-CN
Arrdc4	60.5497	-0.276858	0.190786	-1.45114	0.14674	0.70336	CA-CN
St13	225.533	-0.216312	0.146793	-1.47358	0.140594	0.70336	CA-CN
[truncated: 7,826 more rows]

## Sheet: Ly6clow_pad<0.05
GENE	baseMean	log2FoldChange	lfcSE	stat	pvalue	padj	contrast
Arhgap31	221.963	-1.00585	0.150875	-6.66677	2.615e-11	2.56845e-07	CA-CN
Hp	1079.54	1.00407	0.15866	6.32842	2.47687e-10	1.21639e-06	CA-CN
Rmrp	27.1408	1.03665	0.194163	5.33904	9.34376e-08	0.000305915	CA-CN
Pltp	1428.65	0.746012	0.142448	5.23709	1.63126e-07	0.000327792	CA-CN
Pbx1	386.854	0.837063	0.159961	5.23291	1.66866e-07	0.000327792	CA-CN
F11r	43.6584	0.870835	0.182805	4.76374	1.90034e-06	0.00311086	CA-CN
Naip5	1307.13	-0.473375	0.107639	-4.3978	1.09351e-05	0.0153435	CA-CN

## Sheet: Ly6clow_FC>2
GENE	baseMean	log2FoldChange	lfcSE	stat	pvalue	padj	contrast
Arhgap31	221.963	-1.00585	0.150875	-6.66677	2.615e-11	2.56845e-07	CA-CN
Hp	1079.54	1.00407	0.15866	6.32842	2.47687e-10	1.21639e-06	CA-CN
Rmrp	27.1408	1.03665	0.194163	5.33904	9.34376e-08	0.000305915	CA-CN
