# Supplementary material for: Systemic Influences of Mammary Cancer on Monocytes in Mice
Source: Cancers (Basel). 2022 Feb 7;14(3):833. doi: 10.3390/cancers14030833 (PMC8834227; doi:10.3390/cancers14030833)
Supplement: Supplementary file 1 [file cancers-14-00833-s001.zip › Table S2 C57BL6 mouse BM DEGs.xls]

## Sheet: DEseq2
GENE	baseMean	log2FoldChange	lfcSE	stat	pvalue	padj	contrast
Gcnt2	321.951	1.35569	0.132672	10.2183	1.64118e-24	1.85666e-20	CA-CN
Socs3	172.461	1.22176	0.15423	7.92166	2.34353e-15	8.83747e-12	CA-CN
Pbx1	587.864	0.989281	0.119699	8.26477	1.39965e-16	7.9171e-13	CA-CN
Cd244	597.859	0.919402	0.129595	7.09443	1.29887e-12	2.44901e-09	CA-CN
Lamc1	85.0365	0.874637	0.155653	5.61914	1.91914e-08	1.44742e-05	CA-CN
Galnt6	144.464	0.833288	0.146557	5.68578	1.30221e-08	1.05228e-05	CA-CN
F11r	45.8529	0.824931	0.150275	5.48947	4.03136e-08	2.68275e-05	CA-CN
Lrg1	31.7964	0.8214	0.140099	5.86299	4.54607e-09	4.2858e-06	CA-CN
Irf2bpl	207.97	0.788453	0.146513	5.38146	7.38842e-08	3.98025e-05	CA-CN
Tppp3	295.56	0.753704	0.146031	5.16127	2.45286e-07	0.000108288	CA-CN
Vcan	3241.01	0.732368	0.109742	6.67352	2.49736e-11	4.03609e-08	CA-CN
Shtn1	260.947	0.731099	0.141726	5.15855	2.48871e-07	0.000108288	CA-CN
Phospho1	111.67	0.710796	0.154894	4.58892	4.45555e-06	0.00129245	CA-CN
Rfx2	120.58	0.693023	0.152668	4.53941	5.64119e-06	0.00155656	CA-CN
A730081D07Rik	56.637	0.648264	0.155797	4.16096	3.1691e-05	0.00607661	CA-CN
Lcn2	305.781	0.6449	0.137985	4.67369	2.95842e-06	0.000929684	CA-CN
Il18rap	70.315	0.636994	0.155977	4.08389	4.42878e-05	0.00747802	CA-CN
Jak3	325.723	0.636858	0.143673	4.43269	9.30652e-06	0.00206441	CA-CN
Havcr2	118.978	0.634138	0.152151	4.16781	3.07541e-05	0.00599863	CA-CN
Slc12a7	174.18	0.624716	0.140293	4.45295	8.46975e-06	0.0019522	CA-CN
Aig1	66.6542	0.593391	0.15594	3.80526	0.000141658	0.0180064	CA-CN
Atp11a	1277.01	0.587932	0.123172	4.77327	1.81256e-06	0.00061417	CA-CN
Retreg1	204.537	0.579058	0.137114	4.22317	2.40886e-05	0.00478095	CA-CN
Eps8	697.363	0.575256	0.125252	4.59281	4.37327e-06	0.00129245	CA-CN
Sema6b	163.069	0.573637	0.152752	3.75535	0.000173102	0.0208674	CA-CN
Cttnbp2nl	56.7383	0.571472	0.154966	3.68773	0.000226268	0.0243788	CA-CN
Abi3	733.021	0.570168	0.128157	4.44897	8.62812e-06	0.0019522	CA-CN
Abca13	108.894	0.56539	0.153607	3.68075	0.000232548	0.024819	CA-CN
Treml4	198.525	0.563738	0.155741	3.61971	0.000294928	0.029141	CA-CN
Ahr	410.605	0.559801	0.12221	4.58064	4.63558e-06	0.00131106	CA-CN
C1rl	356.334	0.547755	0.13505	4.05595	4.99309e-05	0.00830688	CA-CN
Ptgfrn	155.425	0.543216	0.15589	3.48461	0.00049285	0.0409971	CA-CN
Sh2d1b1	172.95	0.538274	0.153827	3.49922	0.000466626	0.0396912	CA-CN
Sfxn5	197.782	0.538194	0.136034	3.95631	7.61171e-05	0.0111833	CA-CN
Ier3	63.9882	0.536476	0.155623	3.44728	0.000566268	0.0429753	CA-CN
Fads1	118.037	0.535646	0.154286	3.47178	0.000517021	0.0413272	CA-CN
Gcat	91.9816	0.534066	0.154901	3.4478	0.000565175	0.0429753	CA-CN
Pam	153.47	0.533033	0.153572	3.47089	0.000518736	0.0413272	CA-CN
B4galt6	513.204	0.532051	0.13806	3.85376	0.00011632	0.0156657	CA-CN
Camk2d	1047.72	0.527574	0.105961	4.97893	6.39383e-07	0.000241111	CA-CN
Tmem132a	117.048	0.524928	0.151561	3.46348	0.000533235	0.0418923	CA-CN
Acpp	86.7576	0.524597	0.155819	3.36671	0.000760709	0.0520127	CA-CN
Nrg1	242.891	0.523367	0.146772	3.56585	0.000362676	0.0336347	CA-CN
C4b	36.2078	0.514834	0.149488	3.44397	0.000573233	0.0429753	CA-CN
Selp	31.3923	0.506775	0.145899	3.47347	0.000513769	0.0413272	CA-CN
Il1b	75.2509	0.503582	0.155104	3.24673	0.00116737	0.0717191	CA-CN
Cmklr1	52.0079	0.501127	0.152941	3.27661	0.00105063	0.0677755	CA-CN
Gas2l1	72.9703	0.500226	0.155366	3.21967	0.0012834	0.0768209	CA-CN
Gm20544	76.1754	0.499274	0.154926	3.22266	0.00127005	0.0768209	CA-CN
Slc52a3	36.5632	0.496653	0.142239	3.49168	0.000479996	0.0403881	CA-CN
Arl3	61.3555	0.492724	0.155789	3.16276	0.00156282	0.0875366	CA-CN
Soat2	18.919	0.490069	0.133813	3.66235	0.000249913	0.0259382	CA-CN
Cbwd1	55.1134	0.486311	0.155419	3.12903	0.00175386	0.0917	CA-CN
Fmn1	61.3146	0.485455	0.155752	3.11686	0.00182791	0.0948586	CA-CN
1700071M16Rik	119.54	0.483261	0.148202	3.26082	0.00111089	0.0694336	CA-CN
Bcl2	116.129	0.482694	0.152755	3.15993	0.0015781	0.0879459	CA-CN
Kdm6b	700.646	0.476978	0.129798	3.67478	0.000238056	0.0249363	CA-CN
Slc16a1	167.046	0.473728	0.146038	3.24388	0.00117915	0.0717191	CA-CN
Rps6ka2	29.1532	0.470145	0.146971	3.19889	0.00137957	0.0808654	CA-CN
Zfp36l1	130.807	0.466903	0.154944	3.01336	0.00258374	0.119306	CA-CN
Dmkn	42.7704	0.466195	0.153794	3.0313	0.00243505	0.114306	CA-CN
Cd300lf	303.699	0.460943	0.129704	3.55381	0.00037969	0.0346405	CA-CN
Nxn	159.78	0.459647	0.14993	3.06576	0.00217121	0.105874	CA-CN
Tssk6	41.3168	0.45962	0.152926	3.0055	0.00265142	0.120621	CA-CN
Dgat2	99.7138	0.459429	0.153033	3.00216	0.0026807	0.121307	CA-CN
Clec4e	435.495	0.455056	0.149172	3.05055	0.0022842	0.109034	CA-CN
Pla2g7	721.875	0.450714	0.116867	3.85663	0.000114961	0.0156657	CA-CN
Slc39a8	27.9408	0.449388	0.145738	3.08352	0.00204565	0.101502	CA-CN
Gatm	292.121	0.447373	0.136818	3.26984	0.00107607	0.0687775	CA-CN
Lrp8	99.9348	0.444477	0.152976	2.90553	0.00366627	0.149196	CA-CN
Vdr	48.2731	0.443248	0.153549	2.88669	0.00389312	0.155629	CA-CN
Mmab	73.6805	0.442067	0.155891	2.83574	0.00457201	0.171269	CA-CN
Trip10	94.9899	0.439211	0.153568	2.86004	0.00423584	0.162779	CA-CN
Itgax	28.8173	0.439144	0.14801	2.96699	0.00300732	0.130087	CA-CN
Icam1	380.511	0.433356	0.130843	3.31204	0.000926179	0.0609606	CA-CN
Cd101	29.7788	0.432811	0.148432	2.91588	0.00354685	0.146443	CA-CN
Mrps26	171.226	0.432618	0.141723	3.05256	0.00226895	0.108766	CA-CN
Ino80b	198.08	0.423009	0.141274	2.99424	0.00275131	0.121564	CA-CN
Jmjd4	60.7312	0.42213	0.156052	2.70505	0.00682941	0.215212	CA-CN
Prune2	72.243	0.421116	0.155781	2.70326	0.00686628	0.215773	CA-CN
Pcyt2	183.745	0.418714	0.138748	3.01781	0.00254609	0.118049	CA-CN
Camk2g	404.281	0.414391	0.13154	3.15031	0.00163097	0.0891601	CA-CN
St6gal1	110.983	0.414267	0.155821	2.65861	0.00784626	0.22702	CA-CN
Plppr3	559.714	0.41382	0.129835	3.18727	0.00143622	0.082062	CA-CN
Cchcr1	97.6257	0.413526	0.15434	2.67933	0.00737704	0.221244	CA-CN
Lsr	237.181	0.411023	0.142622	2.88191	0.00395268	0.156249	CA-CN
Rbm4b	106.652	0.409247	0.150869	2.71259	0.00667591	0.213595	CA-CN
Amotl2	78.1647	0.40574	0.155894	2.60266	0.00925034	0.248384	CA-CN
Pick1	51.6229	0.405135	0.155677	2.60241	0.00925721	0.248384	CA-CN
Med9	156.031	0.403333	0.152874	2.63834	0.00833131	0.234458	CA-CN
Flot1	543.327	0.403262	0.126501	3.18782	0.0014335	0.082062	CA-CN
Aldh5a1	45.1717	0.402327	0.153212	2.62595	0.00864082	0.239006	CA-CN
C5ar1	124.813	0.401733	0.15205	2.6421	0.00823935	0.233815	CA-CN
Pim1	795.196	0.401441	0.12293	3.26561	0.00109229	0.068949	CA-CN
Cd38	21.3658	0.401288	0.123635	3.24574	0.00117145	0.0717191	CA-CN
Ift22	68.922	0.401059	0.155886	2.57277	0.0100887	0.259394	CA-CN
Usp49	164.99	0.398184	0.143751	2.76996	0.00560629	0.1932	CA-CN
Rrp12	152.064	0.397493	0.153652	2.58697	0.00968242	0.254147	CA-CN
Nek2	307.828	0.397365	0.143835	2.76264	0.00573361	0.195374	CA-CN
Pif1	285.647	0.397032	0.139008	2.85617	0.00428783	0.162779	CA-CN
Mrnip	30.8556	0.396544	0.144596	2.74243	0.00609869	0.20233	CA-CN
4933408J17Rik	18.6999	0.393989	0.131402	2.99835	0.0027145	0.121564	CA-CN
Dpep2	229.513	0.39156	0.140705	2.78284	0.0053885	0.189634	CA-CN
Magi3	133.203	0.391421	0.153216	2.55469	0.0106281	0.264836	CA-CN
Adora3	80.2493	0.391296	0.155074	2.52329	0.0116262	0.276658	CA-CN
Tmem107	49.1178	0.388649	0.155225	2.50377	0.0122877	0.280519	CA-CN
P2ry12	131.006	0.387539	0.155909	2.48568	0.0129303	0.288521	CA-CN
Pag1	794.805	0.38657	0.133617	2.89312	0.00381438	0.154004	CA-CN
Myof	635.138	0.386059	0.137512	2.80746	0.00499342	0.182228	CA-CN
1810055G02Rik	49.6778	0.385912	0.153352	2.51651	0.0118524	0.276658	CA-CN
C5ar2	89.9941	0.385081	0.156053	2.46762	0.0136014	0.296478	CA-CN
Paqr8	29.8628	0.383152	0.14219	2.69465	0.00704635	0.216648	CA-CN
Sbno2	1796.34	0.382947	0.118038	3.24427	0.00117754	0.0717191	CA-CN
Abcb8	192.642	0.381813	0.148716	2.56739	0.0102467	0.260744	CA-CN
Gpr146	462.34	0.381646	0.135611	2.81426	0.00488897	0.180159	CA-CN
Il1f9	17.1692	0.379984	0.126321	3.00809	0.00262895	0.12041	CA-CN
Jaml	192.616	0.377335	0.149059	2.53144	0.0113594	0.272542	CA-CN
Ercc2	234.611	0.376829	0.134093	2.81021	0.00495084	0.181259	CA-CN
Cenpf	1257.56	0.376107	0.106067	3.54593	0.000391233	0.0354081	CA-CN
Ifitm5	22.0543	0.376053	0.133315	2.82079	0.00479051	0.177484	CA-CN
Pigyl	95.3849	0.371577	0.153046	2.42788	0.0151872	0.317255	CA-CN
Tcp11l1	91.0707	0.371429	0.155051	2.39553	0.0165965	0.334087	CA-CN
Troap	236.487	0.371328	0.135091	2.74873	0.00598272	0.200589	CA-CN
Pmm1	51.4755	0.370865	0.155437	2.38595	0.0170351	0.339293	CA-CN
Plk3	43.4795	0.37049	0.147989	2.5035	0.012297	0.280519	CA-CN
Mns1	58.9603	0.369387	0.155833	2.37041	0.0177685	0.341573	CA-CN
3110056K07Rik	72.5064	0.369156	0.15605	2.36562	0.0179999	0.342107	CA-CN
Mocs3	80.1093	0.368906	0.155943	2.36565	0.0179983	0.342107	CA-CN
Ubxn8	365.627	0.368596	0.128984	2.85769	0.00426737	0.162779	CA-CN
Tnfrsf26	46.799	0.367222	0.155333	2.3641	0.0180741	0.342107	CA-CN
1700021F05Rik	59.0538	0.366743	0.155594	2.35705	0.0184206	0.345592	CA-CN
Cdc25c	173.762	0.366281	0.142875	2.56364	0.010358	0.262148	CA-CN
Ntpcr	196.671	0.365464	0.135467	2.69781	0.00697981	0.216451	CA-CN
Wfdc21	11.6801	0.364894	0.107833	3.38389	0.000714678	0.0502183	CA-CN
Sssca1	85.0499	0.364268	0.15602	2.33475	0.0195566	0.351229	CA-CN
Gmds	59.1253	0.363553	0.155173	2.34289	0.0191352	0.34949	CA-CN
Noct	106.36	0.362176	0.15229	2.3782	0.0173973	0.339669	CA-CN
Dtnb	47.337	0.362164	0.155331	2.33156	0.0197236	0.353389	CA-CN
Gngt2	306.375	0.361712	0.136181	2.65612	0.00790462	0.227621	CA-CN
Slc27a1	37.5341	0.36127	0.15251	2.36884	0.0178441	0.341573	CA-CN
Tgm1	55.6942	0.36031	0.153647	2.34505	0.0190244	0.348821	CA-CN
Aars	520.181	0.360228	0.140887	2.55685	0.0105624	0.264049	CA-CN
Tmem186	154.311	0.360013	0.144684	2.48827	0.0128367	0.287567	CA-CN
1500004A13Rik	41.9842	0.358472	0.150956	2.37467	0.0175644	0.339669	CA-CN
Il4ra	931.347	0.358432	0.107877	3.32259	0.000891871	0.0597026	CA-CN
Rhobtb2	120.479	0.358384	0.154301	2.32263	0.0201992	0.358068	CA-CN
Cd3eap	133.576	0.358006	0.152379	2.34944	0.0188019	0.346991	CA-CN
A230103J11Rik	92.7188	0.357485	0.156041	2.29097	0.0219653	0.371996	CA-CN
Gm6377	35.9756	0.357483	0.14734	2.42625	0.0152556	0.317255	CA-CN
Nfkbil1	124.422	0.357416	0.149071	2.39763	0.0165015	0.33336	CA-CN
Wwc2	140.018	0.357273	0.154562	2.31152	0.0208044	0.361484	CA-CN
Psmc3ip	42.5131	0.35546	0.148824	2.38845	0.0169197	0.338184	CA-CN
Mmachc	55.0489	0.355033	0.155182	2.28785	0.0221461	0.373357	CA-CN
Lss	58.8265	0.353291	0.155996	2.26474	0.0235287	0.384654	CA-CN
Ccr5	207.486	0.352938	0.137308	2.57041	0.0101578	0.260577	CA-CN
Rcl1	92.6147	0.352212	0.152318	2.31234	0.0207588	0.361484	CA-CN
Stxbp3-ps	47.9484	0.351567	0.155715	2.25775	0.023961	0.387798	CA-CN
Tmem129	236.091	0.351031	0.139603	2.51449	0.0119205	0.276913	CA-CN
Taf4b	41.6253	0.350792	0.151932	2.30888	0.0209503	0.361484	CA-CN
Kif14	595.805	0.350108	0.131365	2.66516	0.00769512	0.225244	CA-CN
Tfrc	193.499	0.349671	0.147032	2.37819	0.0173979	0.339669	CA-CN
Map3k6	250.027	0.349216	0.15175	2.30127	0.0213766	0.36586	CA-CN
Vars2	138.556	0.349021	0.152749	2.28492	0.0223173	0.374038	CA-CN
Il31ra	67.6824	0.349007	0.155902	2.23863	0.0251797	0.394819	CA-CN
Mphosph9	356.147	0.34898	0.131448	2.65489	0.00793347	0.227621	CA-CN
Dhfr	282.045	0.348871	0.136419	2.55734	0.0105476	0.264049	CA-CN
Ovgp1	47.3973	0.348683	0.15554	2.24175	0.0249772	0.394819	CA-CN
Yrdc	199.234	0.348526	0.139365	2.50082	0.0123907	0.280879	CA-CN
Exo1	154.197	0.348455	0.146702	2.37526	0.0175368	0.339669	CA-CN
Mboat1	270.619	0.348215	0.144205	2.41472	0.0157474	0.323444	CA-CN
Hypk	122.199	0.348173	0.148726	2.34104	0.0192301	0.34976	CA-CN
Rhof	50.2683	0.348067	0.153981	2.26046	0.0237928	0.385627	CA-CN
Nme7	72.1473	0.347847	0.155175	2.24165	0.0249841	0.394819	CA-CN
Gpsm2	561.297	0.347109	0.112792	3.07743	0.00208791	0.102253	CA-CN
Wipi1	110.896	0.346869	0.151653	2.28726	0.0221807	0.373357	CA-CN
Pmaip1	162.46	0.346281	0.152822	2.26591	0.0234569	0.384654	CA-CN
Setx	1160.79	0.346176	0.110391	3.1359	0.00171331	0.0908154	CA-CN
6430562O15Rik	21.167	0.345918	0.129814	2.66472	0.00770523	0.225244	CA-CN
Fnip2	466.678	0.344233	0.127738	2.69483	0.00704241	0.216648	CA-CN
E130218I03Rik	32.2968	0.343903	0.144355	2.38233	0.0172032	0.339444	CA-CN
Zdhhc1	33.5824	0.343264	0.150682	2.27807	0.0227226	0.376922	CA-CN
2010016I18Rik	59.6232	0.343241	0.155463	2.20786	0.027254	0.407298	CA-CN
Aarsd1	128.431	0.342769	0.147109	2.33003	0.0198045	0.353389	CA-CN
Cactin	309.028	0.342379	0.128705	2.66019	0.00780966	0.22702	CA-CN
Ints5	252.231	0.342268	0.145036	2.35988	0.018281	0.343543	CA-CN
Siglece	353.914	0.342158	0.131764	2.59674	0.00941134	0.249505	CA-CN
Mgat4a	112.439	0.341852	0.153649	2.22488	0.026089	0.40114	CA-CN
Serpinb8	108.008	0.341349	0.155996	2.1882	0.0286554	0.415307	CA-CN
Spdl1	205.371	0.34134	0.147058	2.32112	0.0202801	0.358483	CA-CN
Dbr1	205.443	0.341224	0.14027	2.43262	0.0149901	0.314625	CA-CN
Emilin1	538.016	0.340628	0.121521	2.80304	0.00506241	0.184066	CA-CN
Dcaf15	342.294	0.340035	0.12788	2.65901	0.00783701	0.22702	CA-CN
Cd109	62.9268	0.339712	0.15516	2.18942	0.0285662	0.415307	CA-CN
Cyfip2	479.973	0.339064	0.146346	2.31687	0.0205108	0.359193	CA-CN
Tom1l2	213.654	0.339003	0.146698	2.31089	0.0208387	0.361484	CA-CN
Cep152	267.035	0.338669	0.131959	2.56647	0.0102738	0.260744	CA-CN
Plekhf1	25.828	0.338619	0.144284	2.3469	0.0189305	0.348229	CA-CN
Atg101	268.811	0.338069	0.141171	2.39475	0.0166317	0.334199	CA-CN
Prr5	55.1983	0.337848	0.154411	2.18798	0.0286709	0.415307	CA-CN
Hic2	52.2309	0.337599	0.155333	2.17339	0.0297509	0.424964	CA-CN
Orc1	50.411	0.336113	0.15317	2.19439	0.0282075	0.41497	CA-CN
Gm11651	40.945	0.336003	0.147781	2.27365	0.0229871	0.379087	CA-CN
Katnal1	43.1445	0.334872	0.154773	2.16363	0.030493	0.432291	CA-CN
Mt1	65.2463	0.334853	0.156045	2.14587	0.0318834	0.440412	CA-CN
Ska3	254.309	0.333559	0.131591	2.53481	0.0112507	0.271964	CA-CN
Qtrt2	87.314	0.332293	0.154184	2.15517	0.0311484	0.436117	CA-CN
E2f7	336.079	0.332146	0.138097	2.40516	0.0161654	0.330106	CA-CN
Slc44a1	105.406	0.332117	0.151107	2.19789	0.027957	0.413435	CA-CN
Apex2	90.7551	0.331873	0.152884	2.17075	0.0299498	0.426728	CA-CN
Mrps27	129.791	0.331275	0.150275	2.20446	0.0274922	0.408698	CA-CN
Kif4	651.949	0.330234	0.112931	2.9242	0.0034534	0.143107	CA-CN
Tsr2	86.8385	0.328793	0.154521	2.12782	0.0333523	0.448674	CA-CN
1810011H11Rik	78.7464	0.327909	0.156045	2.10138	0.0356077	0.464699	CA-CN
Ntng2	270.509	0.327567	0.140163	2.33704	0.0194372	0.350737	CA-CN
Nxpe5	68.2995	0.327565	0.156027	2.09941	0.0357811	0.464699	CA-CN
Clec2g	26.1791	0.327486	0.137761	2.3772	0.0174448	0.339669	CA-CN
Mpzl3	41.9499	0.327054	0.154557	2.11607	0.0343389	0.456898	CA-CN
Cep89	122.619	0.326891	0.147512	2.21602	0.02669	0.40475	CA-CN
4833438C02Rik	143.581	0.326405	0.145725	2.23986	0.0250999	0.394819	CA-CN
Plcxd1	118.817	0.325169	0.148459	2.19029	0.0285035	0.415307	CA-CN
Urm1	298.546	0.325075	0.127911	2.54141	0.0110405	0.269957	CA-CN
Cep162	164.99	0.324846	0.145172	2.23766	0.0252433	0.394819	CA-CN
C2cd2l	300.724	0.324028	0.146072	2.21828	0.0265358	0.403494	CA-CN
Mxd3	273.162	0.3235	0.130522	2.47851	0.0131933	0.290947	CA-CN
E330009J07Rik	378.066	0.323107	0.124183	2.60186	0.0092719	0.248384	CA-CN
Slc37a3	164.108	0.322101	0.144849	2.22371	0.0261682	0.40114	CA-CN
Zdhhc23	23.8068	0.321829	0.137846	2.3347	0.0195593	0.351229	CA-CN
Slx4	321.247	0.321756	0.139309	2.30966	0.0209072	0.361484	CA-CN
Trp53inp2	74.6263	0.321637	0.155424	2.06942	0.0385065	0.482019	CA-CN
Pter	22.1343	0.320785	0.136183	2.35553	0.0184961	0.345868	CA-CN
Socs5	127.302	0.319944	0.146799	2.17948	0.0292963	0.420596	CA-CN
Kntc1	533.21	0.319844	0.134361	2.38049	0.0172896	0.339444	CA-CN
Chtf18	174.762	0.319451	0.153357	2.08306	0.0372462	0.475582	CA-CN
Recql4	100.656	0.31897	0.151334	2.10773	0.0350546	0.460596	CA-CN
Lair1	356.304	0.318312	0.128296	2.48108	0.0130984	0.28976	CA-CN
Slc37a2	103.676	0.317894	0.151599	2.09694	0.0359993	0.465308	CA-CN
Il21r	32.8887	0.317766	0.134648	2.35997	0.0182763	0.343543	CA-CN
Emp1	16.8685	0.317547	0.123601	2.56913	0.0101955	0.260744	CA-CN
Actn1	32.9962	0.31745	0.142753	2.22377	0.0261643	0.40114	CA-CN
Ap1s3	88.6305	0.316901	0.154921	2.04557	0.0407983	0.496042	CA-CN
Polr1c	161.783	0.316893	0.140875	2.24947	0.0244828	0.392315	CA-CN
Gnb5	10.8484	0.316468	0.107068	2.95576	0.00311899	0.133656	CA-CN
Cdca2	476.291	0.315178	0.131666	2.39377	0.0166763	0.334502	CA-CN
Mastl	286.837	0.314397	0.140721	2.23419	0.0254706	0.395314	CA-CN
Eme1	226.64	0.313754	0.133338	2.35308	0.0186187	0.345868	CA-CN
Hnrnph3	174.686	0.313576	0.141564	2.21508	0.0267549	0.405128	CA-CN
Rab7b	303.929	0.313093	0.136387	2.29562	0.0216975	0.368565	CA-CN
Odc1	47.5034	0.313002	0.151111	2.07134	0.0383271	0.481772	CA-CN
Sars2	124.94	0.311785	0.151236	2.06158	0.0392481	0.487927	CA-CN
Pgam2	75.6299	0.311042	0.154669	2.01103	0.0443228	0.512955	CA-CN
Eno3	77.309	0.310936	0.15602	1.99293	0.0462696	0.52555	CA-CN
Napepld	47.0549	0.310256	0.153876	2.01627	0.0437717	0.511534	CA-CN
Rnf149	899.794	0.309996	0.111995	2.76795	0.00564097	0.193383	CA-CN
Iqsec1	422.677	0.309723	0.130066	2.38129	0.0172523	0.339444	CA-CN
Ccsap	84.648	0.309579	0.155939	1.98525	0.0471163	0.528796	CA-CN
Dapk3	155.852	0.30941	0.149136	2.07468	0.0380163	0.478929	CA-CN
Rpa2	289.81	0.309362	0.13297	2.32656	0.0199889	0.355566	CA-CN
Spag5	842.756	0.308643	0.112703	2.73856	0.00617097	0.203407	CA-CN
Pced1b	161.98	0.308418	0.1458	2.11534	0.0344007	0.456898	CA-CN
Ttll12	148.575	0.308329	0.151294	2.03795	0.0415548	0.499594	CA-CN
Tjp2	98.0496	0.308154	0.153773	2.00395	0.0450752	0.517701	CA-CN
2008-09-01	124.438	0.30787	0.14816	2.07796	0.0377131	0.477849	CA-CN
Pmch	36.7674	0.307844	0.14878	2.06912	0.0385352	0.482019	CA-CN
Zfp608	433.954	0.307089	0.132144	2.32389	0.0201316	0.357534	CA-CN
Ssx2ip	86.7178	0.307062	0.155166	1.97892	0.0478245	0.530951	CA-CN
Nemp1	452.476	0.306196	0.145024	2.11135	0.0347419	0.459015	CA-CN
Ccne1	253.276	0.305997	0.147812	2.07018	0.038436	0.482019	CA-CN
Zfp444	114.363	0.30553	0.154644	1.9757	0.0481885	0.533602	CA-CN
Slc7a6os	204.427	0.305454	0.13869	2.20243	0.0276352	0.409747	CA-CN
Myl6b	20.3912	0.305413	0.139324	2.1921	0.0283722	0.415307	CA-CN
Cenpt	181.528	0.305335	0.149077	2.04818	0.0405428	0.494247	CA-CN
Atxn1l	790.878	0.305313	0.1126	2.71147	0.00669847	0.213595	CA-CN
Smpdl3b	123.465	0.305122	0.152717	1.99795	0.0457217	0.521948	CA-CN
Slc7a5	205.944	0.304798	0.154454	1.97339	0.0484514	0.533602	CA-CN
Mroh2a	209.539	0.304219	0.138629	2.19448	0.028201	0.41497	CA-CN
Osbpl1a	107.232	0.304093	0.15418	1.97233	0.0485723	0.533602	CA-CN
Usp20	76.1474	0.303711	0.154814	1.96177	0.0497891	0.536256	CA-CN
Get4	244.228	0.302979	0.133761	2.26508	0.0235078	0.384654	CA-CN
Fancd2	343.121	0.302762	0.132609	2.28312	0.0224234	0.374905	CA-CN
Slc39a1	325.635	0.302702	0.125041	2.42082	0.0154857	0.320076	CA-CN
Dtnbp1	156.212	0.302683	0.147383	2.05372	0.0400029	0.492125	CA-CN
Nle1	68.5901	0.302556	0.155321	1.94793	0.051423	0.539798	CA-CN
P2ry2	31.326	0.302255	0.148092	2.041	0.0412506	0.498802	CA-CN
Mad1l1	243.985	0.302167	0.142277	2.12379	0.0336878	0.450661	CA-CN
Tjp3	64.6089	0.302002	0.156044	1.93537	0.0529452	0.542341	CA-CN
Smtn	178.328	0.301969	0.149462	2.02038	0.0433444	0.511136	CA-CN
Rab3il1	53.2805	0.301832	0.155863	1.93653	0.0528033	0.542341	CA-CN
B4galnt2	19.8074	0.301787	0.138384	2.1808	0.0291985	0.419724	CA-CN
Jup	56.6051	0.301375	0.154346	1.95259	0.0508678	0.538323	CA-CN
Zfp11	31.7224	0.30088	0.146096	2.05947	0.0394494	0.488611	CA-CN
Exosc6	144.118	0.300497	0.146291	2.0541	0.039966	0.492125	CA-CN
Polr2l	35.2004	0.300322	0.150474	1.99583	0.0459519	0.523216	CA-CN
Stk35os1	55.2238	0.299938	0.155788	1.92529	0.0541932	0.547985	CA-CN
Cep131	78.9402	0.299614	0.155999	1.92061	0.0547804	0.551361	CA-CN
D330050I16Rik	24.1913	0.299608	0.13858	2.16199	0.0306189	0.432847	CA-CN
Ddx27	324.56	0.299462	0.13279	2.25515	0.0241239	0.38932	CA-CN
Plekha3	325.728	0.298404	0.12672	2.35483	0.0185313	0.345868	CA-CN
Ddr1	27.3772	0.297947	0.132266	2.25263	0.0242826	0.390212	CA-CN
Uap1l1	273.849	0.297423	0.135847	2.18939	0.0285684	0.415307	CA-CN
Gadd45a	103.208	0.297233	0.15581	1.90766	0.0564347	0.55955	CA-CN
Bola3	41.2163	0.297224	0.152086	1.95431	0.050664	0.537675	CA-CN
Cenpe	1380.91	0.297174	0.105175	2.82551	0.00472051	0.175668	CA-CN
Als2	143.112	0.296568	0.1459	2.03267	0.0420854	0.503823	CA-CN
Itga5	737.09	0.29634	0.110363	2.68513	0.00725019	0.218776	CA-CN
Ripk3	438.794	0.296313	0.121252	2.44377	0.0145346	0.3085	CA-CN
Itpr3	394.801	0.296308	0.152186	1.94702	0.0515325	0.539803	CA-CN
Zfp367	387.06	0.296205	0.121865	2.43061	0.0150735	0.31579	CA-CN
Ahi1	63.45	0.295988	0.155996	1.8974	0.0577746	0.562923	CA-CN
Odf2	704.905	0.295838	0.126537	2.33796	0.0193893	0.350737	CA-CN
Acp5	93.3412	0.29533	0.153926	1.91864	0.0550295	0.552885	CA-CN
Avpi1	19.5962	0.294797	0.131882	2.23531	0.0253969	0.395206	CA-CN
Gm16548	21.6586	0.294658	0.126068	2.3373	0.0194234	0.350737	CA-CN
Surf2	180.463	0.294452	0.144045	2.04417	0.0409367	0.496087	CA-CN
Gps1	72.6651	0.294312	0.155309	1.89501	0.058091	0.563622	CA-CN
Polr2f	140.605	0.294272	0.145736	2.01921	0.0434652	0.511136	CA-CN
Id1	206.831	0.294271	0.139575	2.10834	0.0350015	0.460433	CA-CN
Dennd3	72.0991	0.294205	0.155808	1.88826	0.0589908	0.564744	CA-CN
Rbm19	192.503	0.294185	0.15136	1.94361	0.0519428	0.540989	CA-CN
Guca1a	47.2796	0.294021	0.155545	1.89026	0.0587231	0.564744	CA-CN
Tmem237	31.1457	0.293875	0.147745	1.98907	0.0466936	0.527457	CA-CN
Net1	180.777	0.293758	0.145672	2.01656	0.043741	0.511534	CA-CN
Plekha5	48.0828	0.293651	0.154786	1.89714	0.0578098	0.562923	CA-CN
Bst1	313.594	0.293638	0.135353	2.16942	0.0300509	0.427093	CA-CN
Hirip3	339.638	0.293435	0.127289	2.30526	0.0211519	0.363112	CA-CN
Txnrd1	654.469	0.293298	0.133634	2.19478	0.0281796	0.41497	CA-CN
Iqsec2	276.428	0.293164	0.144804	2.02455	0.0429136	0.511136	CA-CN
Kifc3	211.799	0.292895	0.145797	2.00892	0.0445452	0.513177	CA-CN
Tmigd3	57.4728	0.292601	0.154269	1.8967	0.0578679	0.562923	CA-CN
Hivep2	100.501	0.292544	0.152819	1.91432	0.0555792	0.555449	CA-CN
Auh	195.77	0.292506	0.148807	1.96567	0.0493367	0.535504	CA-CN
Odf2l	89.3277	0.292319	0.15461	1.89069	0.0586662	0.564744	CA-CN
Sh3pxd2b	279.335	0.291825	0.151236	1.9296	0.0536563	0.546277	CA-CN
A630066F11Rik	21.752	0.291776	0.137555	2.12116	0.033908	0.451827	CA-CN
1700094J05Rik	23.2838	0.291767	0.139699	2.08854	0.0367494	0.471152	CA-CN
Thap7	167.92	0.291588	0.148381	1.96513	0.0493995	0.535504	CA-CN
Lrrc8b	790.855	0.291324	0.114744	2.53891	0.01112	0.269957	CA-CN
Col11a2	35.9788	0.291011	0.151893	1.91589	0.0553791	0.554409	CA-CN
Zgrf1	236.755	0.290937	0.136003	2.1392	0.0324195	0.4451	CA-CN
Pms2	168.941	0.290384	0.146399	1.98351	0.0473102	0.529921	CA-CN
Opn3	61.2864	0.290381	0.156026	1.8611	0.0627297	0.580263	CA-CN
Gcfc2	114.817	0.29025	0.152668	1.90118	0.0572782	0.562502	CA-CN
Slc20a2	154.566	0.290067	0.146912	1.97442	0.048334	0.533602	CA-CN
Spred2	78.9844	0.289994	0.155719	1.86229	0.0625627	0.579665	CA-CN
Ager	42.6176	0.28932	0.151475	1.91002	0.0561312	0.558498	CA-CN
4930513N10Rik	22.2063	0.289279	0.130837	2.21098	0.0270369	0.405661	CA-CN
Wdr33	541.637	0.288803	0.122154	2.36425	0.0180667	0.342107	CA-CN
Gas8	19.9024	0.288691	0.132552	2.17795	0.0294098	0.421155	CA-CN
Mical3	53.7856	0.288453	0.155821	1.85118	0.0641441	0.58474	CA-CN
Ace	750.19	0.288064	0.146334	1.96854	0.0490062	0.534054	CA-CN
Nsl1	392.718	0.287848	0.133825	2.15093	0.0314816	0.437856	CA-CN
Zcwpw1	133.391	0.286638	0.146432	1.95748	0.0502908	0.537399	CA-CN
Bmp2k	631.228	0.286142	0.125001	2.28911	0.0220727	0.3727	CA-CN
S1pr2	321.471	0.285798	0.135391	2.11092	0.0347796	0.459015	CA-CN
Gm12359	51.8524	0.285773	0.153875	1.85718	0.0632853	0.581597	CA-CN
Riox1	214.117	0.285563	0.141001	2.02525	0.0428417	0.511136	CA-CN
Ap1m2	19.8046	0.285494	0.130739	2.1837	0.0289845	0.418242	CA-CN
Zkscan17	286.317	0.285223	0.134107	2.12684	0.0334334	0.448674	CA-CN
Atad5	561.982	0.284763	0.11241	2.53324	0.0113013	0.272025	CA-CN
Donson	268.238	0.284663	0.128807	2.20999	0.0271058	0.406157	CA-CN
Dusp5	46.469	0.284573	0.144401	1.97072	0.0487562	0.533602	CA-CN
Trak1	592.123	0.284336	0.120314	2.36328	0.0181139	0.342107	CA-CN
Tk1	278.972	0.284323	0.128385	2.21461	0.0267865	0.405128	CA-CN
Zscan25	94.9393	0.284279	0.154215	1.84339	0.0652716	0.588658	CA-CN
9130008F23Rik	25.3535	0.283788	0.14396	1.9713	0.0486897	0.533602	CA-CN
Erp27	13.3555	0.283465	0.113254	2.50291	0.0123176	0.280519	CA-CN
Lyar	159.839	0.283316	0.144184	1.96497	0.049418	0.535504	CA-CN
Igfbp6	8.99555	0.282733	0.105039	2.69169	0.00710904	0.216778	CA-CN
Nhp2	221.868	0.282569	0.144671	1.95318	0.0507982	0.53809	CA-CN
Daam2	37.2415	0.282502	0.150411	1.8782	0.0603542	0.570428	CA-CN
9530082P21Rik	52.3725	0.282459	0.153649	1.83834	0.0660119	0.59035	CA-CN
Porcn	10.6308	0.28219	0.107497	2.62509	0.00866266	0.239026	CA-CN
Mfn2	409.404	0.282136	0.135555	2.08134	0.0374029	0.476888	CA-CN
Lrrc45	215.243	0.282111	0.13837	2.03882	0.0414676	0.499594	CA-CN
Cyp39a1	359.891	0.281735	0.123203	2.28675	0.0222107	0.373357	CA-CN
Arhgap19	1128.76	0.281367	0.11182	2.51626	0.0118608	0.276658	CA-CN
Gpaa1	483.999	0.28104	0.126047	2.22964	0.0257715	0.398296	CA-CN
Afg3l2	329.204	0.281035	0.13054	2.15286	0.0313296	0.437189	CA-CN
Slc13a3	16.7572	0.280982	0.12631	2.22454	0.0261125	0.40114	CA-CN
Rnaseh2c	245.913	0.280966	0.149965	1.87354	0.0609939	0.57311	CA-CN
Aamdc	44.6007	0.280798	0.147312	1.90614	0.0566322	0.560525	CA-CN
Isoc2a	206.137	0.280717	0.137745	2.03794	0.0415556	0.499594	CA-CN
Efcab5	24.4214	0.280335	0.141986	1.97438	0.0483384	0.533602	CA-CN
2310022A10Rik	261.103	0.280296	0.138588	2.02252	0.043123	0.511136	CA-CN
Tomm40	295.953	0.279343	0.136269	2.04994	0.0403703	0.493437	CA-CN
Trpm4	86.3661	0.279207	0.155899	1.79095	0.0733006	0.613804	CA-CN
Csrnp1	121.677	0.278623	0.155869	1.78754	0.0738496	0.616207	CA-CN
Ndufv3	307.631	0.278601	0.134279	2.07479	0.0380056	0.478929	CA-CN
Depdc1b	352.051	0.278478	0.141112	1.97345	0.0484443	0.533602	CA-CN
Hs2st1	319.602	0.277944	0.127962	2.17209	0.0298491	0.42583	CA-CN
Gla	267.845	0.277713	0.132666	2.09331	0.036321	0.467463	CA-CN
Ankle1	277.712	0.277583	0.135588	2.04725	0.0406333	0.494816	CA-CN
Mrpl18	264.648	0.277322	0.139402	1.98937	0.0466604	0.527457	CA-CN
Snrpf	58.0309	0.277226	0.154698	1.79205	0.0731244	0.613804	CA-CN
Unc45a	172.297	0.277021	0.142814	1.93973	0.0524124	0.541146	CA-CN
Tedc1	231.366	0.276839	0.139863	1.97936	0.0477752	0.530951	CA-CN
4930579G24Rik	202.952	0.276769	0.146777	1.88564	0.0593435	0.566381	CA-CN
Arhgap23	334.268	0.276718	0.139199	1.98793	0.0468195	0.527457	CA-CN
P2ry13	71.0714	0.276293	0.155601	1.77565	0.0757908	0.621597	CA-CN
Cdk5rap2	509.452	0.276079	0.125843	2.19384	0.0282467	0.415006	CA-CN
Ccnf	768.597	0.275961	0.12937	2.13312	0.0329149	0.447222	CA-CN
Rab3ip	84.766	0.275607	0.155054	1.77749	0.0754872	0.62063	CA-CN
Ascc2	318.542	0.275505	0.133496	2.06377	0.0390398	0.486756	CA-CN
Ppp1r3d	106.853	0.275486	0.152543	1.80596	0.0709248	0.609772	CA-CN
Shmt2	366.234	0.274959	0.13867	1.98283	0.0473865	0.530106	CA-CN
Ggn	31.0337	0.27473	0.141998	1.93475	0.0530212	0.542341	CA-CN
Cep85	220.283	0.274276	0.142094	1.93025	0.0535759	0.546277	CA-CN
Nfs1	284.316	0.274046	0.128296	2.13604	0.0326765	0.447157	CA-CN
Bcl3	584.377	0.274006	0.144816	1.8921	0.0584782	0.564744	CA-CN
Bad	223.054	0.273938	0.133363	2.05408	0.0399677	0.492125	CA-CN
Ttf2	546.287	0.273916	0.12832	2.13464	0.0327907	0.447222	CA-CN
Dnaaf3	56.8579	0.273292	0.155626	1.75608	0.0790739	0.63403	CA-CN
Nfil3	625.425	0.272905	0.119837	2.2773	0.0227684	0.377128	CA-CN
Ptch1	64.5136	0.272826	0.155873	1.75032	0.080064	0.638311	CA-CN
Gfm1	299.827	0.272823	0.131531	2.07421	0.0380602	0.478948	CA-CN
Large1	40.1136	0.272788	0.154049	1.77079	0.0765964	0.625842	CA-CN
Hspb6	56.0971	0.272721	0.154722	1.76266	0.0779582	0.630859	CA-CN
Acad10	24.9328	0.272675	0.140785	1.93683	0.0527666	0.542341	CA-CN
Ptov1	258.04	0.272654	0.137417	1.98415	0.0472396	0.529655	CA-CN
Rnf217	186.867	0.272317	0.146294	1.86144	0.0626827	0.580263	CA-CN
Plscr1	71.14	0.272109	0.15602	1.74407	0.0811471	0.642092	CA-CN
Gypc	325.953	0.272049	0.128808	2.11205	0.0346822	0.4589	CA-CN
Coq3	65.6181	0.271712	0.156046	1.74122	0.0816443	0.64231	CA-CN
Vopp1	238.282	0.271529	0.141005	1.92566	0.0541465	0.547985	CA-CN
Slc35d1	147.422	0.271368	0.143721	1.88815	0.0590053	0.564744	CA-CN
1110004E09Rik	29.9127	0.270051	0.144935	1.86326	0.0624262	0.579624	CA-CN
3110040N11Rik	56.7287	0.269788	0.155513	1.73482	0.0827724	0.644052	CA-CN
Ckap2l	973.218	0.269546	0.110389	2.44179	0.0146146	0.309037	CA-CN
Ccdc18	112.051	0.269482	0.154841	1.74037	0.0817934	0.642589	CA-CN
Chaf1a	414.288	0.269237	0.139059	1.93614	0.0528506	0.542341	CA-CN
Lrrc42	107.031	0.269179	0.154816	1.7387	0.0820873	0.64353	CA-CN
Iffo2	111.837	0.268966	0.155787	1.7265	0.0842583	0.648886	CA-CN
Chd7	250.54	0.268796	0.142653	1.88427	0.059529	0.566502	CA-CN
Noxred1	11.3283	0.268631	0.114947	2.33701	0.0194389	0.350737	CA-CN
Acvrl1	236.27	0.268559	0.139191	1.92944	0.0536768	0.546277	CA-CN
Gsdme	86.117	0.268511	0.156053	1.72064	0.0853162	0.65108	CA-CN
Kif20a	1064.55	0.268429	0.106053	2.53109	0.011371	0.272542	CA-CN
1700037C18Rik	11.2869	0.268372	0.109095	2.45998	0.0138944	0.300549	CA-CN
Fancf	55.1567	0.268334	0.156049	1.71955	0.0855147	0.65108	CA-CN
Gtf2f1	443.045	0.268039	0.119696	2.23933	0.0251344	0.394819	CA-CN
Lbp	303.852	0.267215	0.148598	1.79824	0.0721394	0.611437	CA-CN
Dcun1d2	257.587	0.267095	0.135541	1.97059	0.0487708	0.533602	CA-CN
Smad7	192.168	0.267006	0.136472	1.9565	0.0504066	0.537675	CA-CN
Atxn1	101.99	0.2669	0.155207	1.71964	0.0854981	0.65108	CA-CN
Rad18	186.604	0.266577	0.138518	1.92449	0.0542936	0.548414	CA-CN
Arhgap18	352.759	0.265588	0.131592	2.01828	0.0435626	0.511136	CA-CN
Zfpl1	192.488	0.265423	0.146333	1.81383	0.0697036	0.605173	CA-CN
Slc12a2	47.0921	0.265359	0.147437	1.79981	0.0718908	0.611044	CA-CN
Tmem176a	356.594	0.26535	0.125026	2.12235	0.0338081	0.45156	CA-CN
Tab3	216.62	0.265216	0.136583	1.94179	0.0521626	0.540989	CA-CN
Mir22hg	143.324	0.264446	0.151425	1.74639	0.0807434	0.641891	CA-CN
Adam9	676.56	0.264364	0.11278	2.34407	0.0190743	0.349172	CA-CN
D730005E14Rik	77.1325	0.264279	0.155865	1.69556	0.0899684	0.66006	CA-CN
Zbtb42	205.449	0.264216	0.142159	1.85859	0.0630851	0.581306	CA-CN
Trem1	47.2138	0.264098	0.153787	1.7173	0.0859243	0.65108	CA-CN
Rbbp6	876.777	0.263675	0.103842	2.53918	0.0111111	0.269957	CA-CN
Bcl7a	110.876	0.263623	0.15597	1.69021	0.0909869	0.661526	CA-CN
Zfp707	64.4344	0.263188	0.155314	1.69456	0.0901588	0.660173	CA-CN
Mrpl2	187.396	0.262572	0.13842	1.89693	0.0578374	0.562923	CA-CN
Ppie	171.692	0.262557	0.146392	1.79352	0.0728901	0.613804	CA-CN
Cyth3	158.884	0.262547	0.155463	1.68881	0.0912555	0.662627	CA-CN
Hsd11b1	329.168	0.262207	0.142163	1.84442	0.0651226	0.588658	CA-CN
D630044L22Rik	94.8467	0.262184	0.153443	1.70868	0.0875109	0.654541	CA-CN
Tes	222.212	0.262084	0.136005	1.92701	0.0539778	0.547364	CA-CN
Wdr59	94.8863	0.261942	0.153998	1.70095	0.0889526	0.6561	CA-CN
D17H6S53E	119.918	0.261678	0.153314	1.70681	0.0878566	0.65485	CA-CN
Tspoap1	300.157	0.26153	0.141895	1.84312	0.0653118	0.588658	CA-CN
Gm10575	8.64392	0.261493	0.106537	2.45449	0.0141086	0.303509	CA-CN
Ccdc124	241.767	0.261379	0.143291	1.82411	0.0681352	0.599862	CA-CN
Sgo1	351.45	0.261349	0.125155	2.0882	0.0367797	0.471152	CA-CN
Hfe	356.286	0.261182	0.128007	2.04037	0.0413133	0.498802	CA-CN
Pdlim7	74.6509	0.261097	0.15596	1.67414	0.094104	0.67252	CA-CN
Chaf1b	194.666	0.260756	0.149338	1.74608	0.0807966	0.641891	CA-CN
Adam8	91.5022	0.260701	0.155525	1.67627	0.0936861	0.672435	CA-CN
Bub1b	1213.63	0.260598	0.11814	2.20584	0.027395	0.408327	CA-CN
Apcdd1	46.9914	0.260458	0.153966	1.69167	0.0907098	0.661211	CA-CN
Tram2	57.8391	0.260339	0.150786	1.72654	0.0842496	0.648886	CA-CN
Pcnt	635.935	0.259922	0.145121	1.79107	0.0732826	0.613804	CA-CN
Lgmn	537.192	0.259899	0.113523	2.28939	0.0220564	0.3727	CA-CN
Cahm	10.3486	0.259761	0.109143	2.38	0.0173127	0.339444	CA-CN
Megf8	132.267	0.259719	0.15264	1.70152	0.0888456	0.6561	CA-CN
Pcca	184.089	0.259546	0.140574	1.84633	0.0648439	0.588658	CA-CN
Smyd3	116.072	0.259386	0.149661	1.73315	0.0830691	0.644113	CA-CN
Rusc1	143.196	0.259119	0.154096	1.68155	0.0926564	0.669669	CA-CN
Kcnn4	41.6558	0.258984	0.150782	1.7176	0.0858691	0.65108	CA-CN
Cxcr3	30.6482	0.258742	0.148509	1.74227	0.0814621	0.642092	CA-CN
Rpap3	76.7558	0.258631	0.155142	1.66706	0.095502	0.674416	CA-CN
Wee1	285.107	0.258346	0.136053	1.89886	0.0575827	0.562923	CA-CN
Pimreg	272.366	0.258281	0.131601	1.96261	0.049692	0.536256	CA-CN
D130020L05Rik	130.877	0.258062	0.152415	1.69316	0.0904256	0.660668	CA-CN
Tut1	147.481	0.258021	0.147353	1.75103	0.0799403	0.638311	CA-CN
Fam234b	91.9096	0.25794	0.15303	1.68555	0.0918831	0.665476	CA-CN
Fgd6	83.1472	0.257256	0.155927	1.64984	0.0989752	0.680672	CA-CN
Ppp2r3d	63.713	0.257037	0.155415	1.65388	0.0981525	0.679616	CA-CN
Pym1	210.706	0.256892	0.136022	1.88862	0.0589432	0.564744	CA-CN
Tarm1	177.812	0.256566	0.147048	1.74478	0.081024	0.642092	CA-CN
Zfp931	24.9423	0.256207	0.140725	1.82063	0.0686637	0.602567	CA-CN
Flywch1	129.141	0.255846	0.148965	1.71749	0.0858904	0.65108	CA-CN
Tm7sf2	70.4669	0.255809	0.15591	1.64074	0.10085	0.68565	CA-CN
Csf2rb2	674.185	0.255675	0.136035	1.87949	0.060178	0.570179	CA-CN
Ptpru	48.3766	0.255651	0.152535	1.67601	0.0937355	0.672435	CA-CN
Pola2	338.343	0.255557	0.145205	1.75997	0.078413	0.633181	CA-CN
Gm12500	18.9419	0.255493	0.131772	1.93891	0.0525125	0.541146	CA-CN
Kri1	511.978	0.255212	0.11822	2.15879	0.0308661	0.434855	CA-CN
Cby1	109.706	0.255164	0.153458	1.66276	0.0963612	0.675006	CA-CN
Nme1	315.834	0.255063	0.13179	1.93538	0.0529442	0.542341	CA-CN
Cyb561d2	113.951	0.255031	0.150832	1.69083	0.090869	0.66152	CA-CN
Cep164	216.118	0.255008	0.153208	1.66446	0.0960211	0.674854	CA-CN
F10	1554.75	0.254803	0.0984283	2.58872	0.00963346	0.253601	CA-CN
Anapc13	108.557	0.254775	0.155106	1.64259	0.100468	0.684285	CA-CN
Wrap53	153.531	0.25459	0.150618	1.6903	0.0909707	0.661526	CA-CN
Zc3hav1l	71.279	0.254443	0.153073	1.66223	0.096467	0.675329	CA-CN
Pprc1	320.017	0.254421	0.133646	1.90369	0.0569503	0.561487	CA-CN
Fem1b	694.892	0.25442	0.108202	2.35134	0.0187058	0.346715	CA-CN
Def6	503.132	0.254382	0.119592	2.12709	0.0334129	0.448674	CA-CN
Slc25a30	259.972	0.254086	0.132641	1.91558	0.0554182	0.554409	CA-CN
Parpbp	273.901	0.254	0.142796	1.77877	0.0752779	0.620226	CA-CN
Aldh18a1	142.409	0.253979	0.154168	1.64741	0.0994732	0.681612	CA-CN
9230116L04Rik	22.0714	0.253765	0.128122	1.98066	0.0476295	0.530786	CA-CN
Qtrt1	63.4428	0.253701	0.155977	1.62652	0.103838	0.693693	CA-CN
Neil3	595.532	0.253555	0.110914	2.28606	0.0222509	0.373478	CA-CN
Mex3d	97.5825	0.253424	0.152288	1.6641	0.0960919	0.674854	CA-CN
Tnip2	249.399	0.253415	0.139742	1.81345	0.0697619	0.605173	CA-CN
Sapcd2	79.0621	0.253326	0.156038	1.62349	0.104485	0.695726	CA-CN
Gk	313.509	0.253319	0.134249	1.88694	0.0591683	0.565347	CA-CN
Pilra	584.271	0.253167	0.129085	1.96125	0.0498501	0.536256	CA-CN
Wdr18	256.701	0.253118	0.149414	1.69407	0.0902516	0.660413	CA-CN
Ppm1b	166.643	0.253115	0.140273	1.80444	0.0711616	0.610319	CA-CN
Mrpl54	162.927	0.253023	0.146095	1.73191	0.0832904	0.644945	CA-CN
Sh2b2	514.556	0.252705	0.133827	1.8883	0.0589854	0.564744	CA-CN
Srr	193.345	0.252681	0.140523	1.79815	0.0721532	0.611437	CA-CN
Mthfd1	260.293	0.252624	0.132166	1.91142	0.0559506	0.557682	CA-CN
Lctl	30.8746	0.252126	0.150507	1.67518	0.0938983	0.672448	CA-CN
Tomm20	172.314	0.25196	0.140403	1.79455	0.0727255	0.613804	CA-CN
Gnl3	135.971	0.251708	0.146109	1.72273	0.0849367	0.65108	CA-CN
Usp44	74.4228	0.251696	0.155401	1.61966	0.105305	0.698842	CA-CN
Trim27	426.813	0.251666	0.133603	1.88368	0.0596082	0.566664	CA-CN
Ttc27	132.3	0.251522	0.150301	1.67345	0.094238	0.672627	CA-CN
Nolc1	349.846	0.251445	0.131161	1.91707	0.0552293	0.553909	CA-CN
Pias4	187.31	0.251351	0.153282	1.6398	0.101046	0.685825	CA-CN
Fbxl2	124.153	0.251235	0.153339	1.63843	0.101332	0.686872	CA-CN
Trib1	76.5589	0.25107	0.147846	1.69819	0.0894712	0.658127	CA-CN
Ednrb	145.827	0.250575	0.156049	1.60575	0.108329	0.706209	CA-CN
Ecm1	107.834	0.250464	0.152118	1.64651	0.0996587	0.681961	CA-CN
Prkrip1	97.4012	0.250347	0.153521	1.6307	0.102953	0.69274	CA-CN
Trem3	200.705	0.250281	0.138949	1.80125	0.071663	0.610319	CA-CN
Slc25a14	43.1614	0.250119	0.153429	1.63019	0.103061	0.69274	CA-CN
Fam110a	185.939	0.25007	0.144093	1.73547	0.0826571	0.644052	CA-CN
Ncbp3	464.147	0.25	0.120245	2.07909	0.0376092	0.477849	CA-CN
Fam43a	334.476	0.249728	0.137605	1.81482	0.0695516	0.605173	CA-CN
Pofut2	362.438	0.249482	0.131308	1.89998	0.0574362	0.562923	CA-CN
Mtcp1	66.2578	0.249223	0.155713	1.60053	0.10948	0.708149	CA-CN
C920009B18Rik	149.409	0.249207	0.149309	1.66907	0.0951028	0.673684	CA-CN
Sbf2	82.9041	0.248954	0.155664	1.59931	0.109752	0.708634	CA-CN
Trem2	350.142	0.248369	0.130337	1.90559	0.0567031	0.560736	CA-CN
Rrp15	69.7999	0.248362	0.155487	1.59732	0.110194	0.709114	CA-CN
Tarsl2	53.9902	0.248296	0.154595	1.6061	0.108251	0.706209	CA-CN
Utp4	134.707	0.248149	0.150139	1.65279	0.0983734	0.679616	CA-CN
Tube1	118.72	0.248121	0.153217	1.6194	0.105361	0.698842	CA-CN
Manbal	143.84	0.247842	0.145279	1.70597	0.088014	0.65485	CA-CN
Zdhhc12	136.288	0.247839	0.148377	1.67033	0.0948532	0.673684	CA-CN
Gm14005	127.543	0.247808	0.150012	1.65193	0.0985495	0.679733	CA-CN
Usp53	72.2003	0.247515	0.155018	1.59668	0.110337	0.709227	CA-CN
Arid5a	698.461	0.247458	0.109343	2.26314	0.0236271	0.385148	CA-CN
Tpgs1	291.69	0.247327	0.134102	1.84432	0.0651369	0.588658	CA-CN
Naa10	242.957	0.24723	0.132533	1.86543	0.0621215	0.577945	CA-CN
Tnks1bp1	97.1897	0.247074	0.151586	1.62992	0.103118	0.69274	CA-CN
Foxn3	290.786	0.247046	0.140504	1.75828	0.0787002	0.63403	CA-CN
Cit	372.151	0.2468	0.14862	1.66061	0.0967926	0.675935	CA-CN
Mrpl38	153.264	0.246409	0.154589	1.59396	0.110944	0.710269	CA-CN
Olfm1	1267.63	0.246052	0.125622	1.95866	0.050152	0.537399	CA-CN
Srxn1	58.4119	0.245962	0.155513	1.58162	0.113735	0.713618	CA-CN
Nt5dc3	163.197	0.245825	0.149916	1.63975	0.101058	0.685825	CA-CN
Cmtr2	129.456	0.245664	0.149755	1.64044	0.100913	0.685663	CA-CN
F7	25.3537	0.245412	0.132411	1.85342	0.0638227	0.583692	CA-CN
Mctp2	29.8173	0.245289	0.145964	1.68048	0.0928646	0.670011	CA-CN
Spryd3	344.388	0.24524	0.131996	1.85793	0.0631785	0.581306	CA-CN
Helq	104.02	0.245112	0.155992	1.57131	0.11611	0.721204	CA-CN
Ube2g2	397.015	0.245034	0.129432	1.89315	0.0583385	0.564744	CA-CN
Coq6	110.403	0.244899	0.154017	1.59008	0.111818	0.710742	CA-CN
Ecsit	155.911	0.244829	0.142365	1.71972	0.0854826	0.65108	CA-CN
Rbm15	320.56	0.244807	0.123194	1.98717	0.0469037	0.527457	CA-CN
Rrp1b	315.423	0.244767	0.135898	1.80112	0.0716844	0.610319	CA-CN
Nmb	24.4833	0.244631	0.142004	1.72271	0.0849417	0.65108	CA-CN
Safb	450.239	0.244457	0.124082	1.97013	0.0488239	0.533667	CA-CN
Prmt1	405.304	0.244267	0.120843	2.02136	0.0432426	0.511136	CA-CN
Akt1s1	190.782	0.244248	0.139089	1.75606	0.0790786	0.63403	CA-CN
Bud23	255.582	0.244236	0.133548	1.82883	0.0674253	0.596389	CA-CN
Hrh2	97.438	0.244046	0.15479	1.57663	0.11488	0.715713	CA-CN
Habp4	107.019	0.243835	0.152877	1.59498	0.110716	0.710269	CA-CN
Wdr76	516.384	0.243386	0.112853	2.15666	0.0310325	0.435848	CA-CN
Snx7	78.6936	0.243341	0.155702	1.56286	0.118085	0.725634	CA-CN
D030056L22Rik	132.392	0.243208	0.15154	1.60491	0.108514	0.706343	CA-CN
Mccc1	96.1652	0.243181	0.153865	1.58049	0.113996	0.713687	CA-CN
Fcgr4	112.414	0.242935	0.155723	1.56005	0.118749	0.725878	CA-CN
Xrcc3	181.672	0.242657	0.13974	1.73649	0.0824772	0.644052	CA-CN
Serinc5	505.743	0.242411	0.118098	2.05263	0.0401089	0.492673	CA-CN
Lmna	16.1137	0.242205	0.114773	2.11029	0.034833	0.459015	CA-CN
Stard10	42.9496	0.242096	0.153298	1.57926	0.114277	0.71466	CA-CN
Pdhx	242.027	0.242029	0.140378	1.72412	0.0846854	0.650921	CA-CN
4931414P19Rik	79.9136	0.241829	0.156008	1.55011	0.121116	0.734267	CA-CN
Nudc	156.236	0.241704	0.146569	1.64908	0.0991303	0.680827	CA-CN
Dcakd	169.503	0.241637	0.152479	1.58472	0.113029	0.713125	CA-CN
Hipk2	344.6	0.241609	0.144124	1.6764	0.0936605	0.672435	CA-CN
Rad54b	168.348	0.241439	0.152548	1.58271	0.113488	0.713618	CA-CN
Ccdc34	183.862	0.241427	0.13966	1.72868	0.0838655	0.647625	CA-CN
Bfsp1	26.065	0.241272	0.139704	1.72703	0.0841631	0.648886	CA-CN
D4Ertd617e	19.3659	0.241227	0.131865	1.82935	0.0673478	0.596321	CA-CN
Zfp346	191.132	0.241015	0.139941	1.72226	0.0850216	0.65108	CA-CN
Agpat4	216.374	0.240952	0.143451	1.67968	0.09302	0.670045	CA-CN
Hexdc	40.6616	0.240899	0.152633	1.57829	0.114499	0.715402	CA-CN
Tfdp2	275.09	0.240767	0.133525	1.80316	0.0713639	0.610319	CA-CN
Fam129b	1147.01	0.24058	0.113234	2.12464	0.0336169	0.450601	CA-CN
Sart1	416.276	0.240329	0.135755	1.77032	0.0766743	0.625842	CA-CN
Aldoc	20.1188	0.240126	0.134503	1.78528	0.0742156	0.617075	CA-CN
1110008L16Rik	64.1769	0.24002	0.155277	1.54576	0.122163	0.736548	CA-CN
Clspn	498.619	0.240007	0.130605	1.83766	0.0661121	0.590779	CA-CN
Mad2l1bp	141.268	0.239995	0.149649	1.60372	0.108776	0.706825	CA-CN
Smn1	268.837	0.239955	0.131895	1.81929	0.0688672	0.602567	CA-CN
Zfp518b	120.692	0.239887	0.152764	1.57031	0.116342	0.721204	CA-CN
Engase	75.3337	0.239859	0.154464	1.55284	0.12046	0.732143	CA-CN
Cnpy4	245.301	0.239289	0.147579	1.62143	0.104925	0.697423	CA-CN
Snapc1	105.629	0.23913	0.153439	1.55847	0.119123	0.726879	CA-CN
Inafm2	241.104	0.23911	0.13659	1.75057	0.0800208	0.638311	CA-CN
Tspan13	325.311	0.239108	0.129366	1.84831	0.064557	0.587085	CA-CN
Fkbp2	141.046	0.239017	0.147654	1.61876	0.105498	0.698842	CA-CN
Tarbp1	58.68	0.238917	0.155388	1.53755	0.124159	0.738229	CA-CN
Fancm	216.765	0.238798	0.140132	1.70409	0.0883641	0.65485	CA-CN
D430020J02Rik	59.1856	0.238708	0.149303	1.59882	0.109861	0.708634	CA-CN
Htatsf1	337.097	0.238659	0.13078	1.82489	0.0680179	0.599756	CA-CN
Slc28a2	177.36	0.238542	0.148879	1.60225	0.109099	0.707708	CA-CN
Acadvl	330.646	0.238496	0.121968	1.9554	0.0505363	0.537675	CA-CN
Rbm34	173.578	0.238242	0.144715	1.64629	0.0997051	0.681961	CA-CN
Plec	2988.98	0.238241	0.122087	1.95141	0.0510081	0.538525	CA-CN
Yars	256.14	0.238209	0.131322	1.81392	0.0696897	0.605173	CA-CN
Nav2	109.751	0.238122	0.155399	1.53233	0.125442	0.741826	CA-CN
Ptpn4	96.9747	0.238114	0.154335	1.54284	0.12287	0.738027	CA-CN
Hspbap1	120.749	0.237987	0.151554	1.57031	0.116344	0.721204	CA-CN
Nol12	150.44	0.237803	0.147935	1.60749	0.107948	0.705815	CA-CN
Fxn	43.2506	0.237239	0.153184	1.54872	0.121449	0.734267	CA-CN
Rab11fip5	404.499	0.237199	0.1332	1.78077	0.0749503	0.6196	CA-CN
Mettl18	32.5953	0.237116	0.149153	1.58975	0.111892	0.710742	CA-CN
Asb8	285.812	0.237093	0.133988	1.76951	0.0768095	0.626493	CA-CN
Txnrd2	116.43	0.237077	0.154539	1.53409	0.125007	0.740422	CA-CN
Gpatch11	186.301	0.236789	0.151639	1.56154	0.118397	0.725703	CA-CN
Gm15350	35.6391	0.236733	0.152346	1.55392	0.120205	0.731509	CA-CN
Midn	794.773	0.236676	0.135721	1.74384	0.0811867	0.642092	CA-CN
Pygm	19.6418	0.236611	0.121128	1.9534	0.0507728	0.53809	CA-CN
Cdc20	483.951	0.236157	0.135234	1.74629	0.0807604	0.641891	CA-CN
Pik3r5	1184.56	0.236007	0.116726	2.02189	0.0431877	0.511136	CA-CN
Tubg1	182.59	0.235859	0.150503	1.56714	0.117083	0.72284	CA-CN
Gm44504	161.322	0.235761	0.14629	1.6116	0.10705	0.704164	CA-CN
Tubb6	189.448	0.235688	0.152116	1.54939	0.121287	0.734267	CA-CN
Kdm8	73.1236	0.235551	0.15604	1.50955	0.131157	0.74558	CA-CN
Ahdc1	107.508	0.235366	0.152648	1.54188	0.123102	0.738027	CA-CN
Snrpa1	182.303	0.235351	0.144271	1.63131	0.102825	0.69274	CA-CN
Cxxc1	533.343	0.235303	0.111897	2.10286	0.035478	0.464699	CA-CN
Hdac6	209.939	0.235299	0.144528	1.62805	0.103515	0.693563	CA-CN
Trim56	326.443	0.23526	0.131529	1.78866	0.0736698	0.615529	CA-CN
Asb1	155.456	0.235159	0.146071	1.6099	0.10742	0.704487	CA-CN
Ccdc14	118.109	0.235087	0.152792	1.53861	0.123899	0.738229	CA-CN
Abhd8	109.249	0.234974	0.154453	1.52133	0.128177	0.744421	CA-CN
Zfyve19	175.181	0.234874	0.142781	1.645	0.0999699	0.682535	CA-CN
Tnfsf9	31.0535	0.234642	0.148704	1.57791	0.114586	0.715402	CA-CN
Kif18b	461.004	0.234631	0.148046	1.58486	0.112999	0.713125	CA-CN
Tbc1d10a	89.1825	0.234592	0.154565	1.51775	0.129077	0.744421	CA-CN
Pkmyt1	623.422	0.234467	0.1147	2.04418	0.0409353	0.496087	CA-CN
Mecp2	849.989	0.234421	0.107227	2.18621	0.0288002	0.416113	CA-CN
Brca1	480.362	0.234391	0.126083	1.85902	0.0630245	0.581306	CA-CN
Exosc2	130.391	0.234066	0.150671	1.55349	0.120306	0.731734	CA-CN
Pfdn6	187.129	0.233978	0.144291	1.62158	0.104894	0.697423	CA-CN
Elp6	47.0432	0.23358	0.152245	1.53424	0.124972	0.740422	CA-CN
Ndufaf3	135.457	0.233579	0.148124	1.57691	0.114816	0.715713	CA-CN
Reep4	414.814	0.233547	0.125017	1.86812	0.0617455	0.57572	CA-CN
Cst7	67.5902	0.233431	0.15581	1.49818	0.134087	0.749018	CA-CN
Mtor	449.776	0.233326	0.131914	1.76877	0.0769319	0.626588	CA-CN
Tssk4	9.05951	0.233164	0.110255	2.11476	0.0344501	0.456898	CA-CN
Abcg3	155.984	0.232846	0.152498	1.52688	0.126792	0.744421	CA-CN
Oip5	165.822	0.232769	0.146157	1.5926	0.11125	0.710697	CA-CN
Rnf26	157.256	0.232703	0.153472	1.51626	0.129454	0.744421	CA-CN
Acbd6	143.778	0.232402	0.14857	1.56426	0.117757	0.724925	CA-CN
Anapc15	105.35	0.232333	0.150794	1.54073	0.123384	0.738172	CA-CN
Pla2g12a	17.5704	0.232205	0.126168	1.84044	0.0657036	0.588658	CA-CN
Mr1	47.9773	0.231903	0.14785	1.56851	0.116763	0.722616	CA-CN
Hmgb3	28.2045	0.23164	0.144146	1.60698	0.108059	0.705815	CA-CN
Dhx8	499.939	0.231616	0.125105	1.85137	0.0641159	0.58474	CA-CN
Arl1	137.15	0.23153	0.149753	1.54607	0.122087	0.736548	CA-CN
Fip1l1	458.555	0.231411	0.125134	1.84931	0.0644129	0.586246	CA-CN
Usp31	254.551	0.231262	0.133242	1.73565	0.0826251	0.644052	CA-CN
Hcfc2	142.503	0.231249	0.151188	1.52955	0.126128	0.742785	CA-CN
Gpx3	293.748	0.231236	0.137145	1.68607	0.0917824	0.665172	CA-CN
Maml3	191.644	0.231138	0.152281	1.51785	0.129053	0.744421	CA-CN
Jade1	366.048	0.231116	0.128607	1.79706	0.0723253	0.61198	CA-CN
Mtmr7	44.9224	0.231084	0.154809	1.4927	0.135516	0.751515	CA-CN
Fam83f	44.3142	0.230824	0.152275	1.51584	0.129559	0.744421	CA-CN
Tmem17	8.63936	0.230627	0.100265	2.30018	0.0214378	0.366354	CA-CN
Top3a	200.189	0.2305	0.135141	1.70562	0.0880781	0.65485	CA-CN
Dis3	244.557	0.230448	0.135462	1.7012	0.0889049	0.6561	CA-CN
Leo1	134.198	0.230046	0.155865	1.47593	0.139962	0.75589	CA-CN
Selenon	320.247	0.229642	0.148802	1.54327	0.122765	0.738027	CA-CN
Prkcg	59.9757	0.229626	0.155044	1.48103	0.138598	0.755642	CA-CN
Lrp1	5313.28	0.229561	0.134706	1.70417	0.0883502	0.65485	CA-CN
Cenpo	190.769	0.229366	0.149309	1.53619	0.124493	0.738923	CA-CN
Kynu	113.436	0.229117	0.156038	1.46834	0.142011	0.757458	CA-CN
Haus1	77.1049	0.229043	0.155599	1.47201	0.141019	0.757166	CA-CN
Mmgt2	173.027	0.229024	0.142493	1.60726	0.107997	0.705815	CA-CN
Trim41	477.523	0.229003	0.117782	1.9443	0.0518599	0.540989	CA-CN
Ypel1	24.474	0.228945	0.137097	1.66994	0.094931	0.673684	CA-CN
Aldh6a1	79.333	0.228856	0.155824	1.46868	0.14192	0.757458	CA-CN
Gpd2	514.931	0.228428	0.122256	1.86844	0.0617007	0.57572	CA-CN
Rad54l	366.224	0.228143	0.129616	1.76014	0.0783836	0.633181	CA-CN
Rfx1	343.146	0.22763	0.132896	1.71285	0.086741	0.653115	CA-CN
Zfp597	426.302	0.227589	0.123648	1.84061	0.0656782	0.588658	CA-CN
1810043G02Rik	133.43	0.22741	0.154004	1.47665	0.139771	0.75589	CA-CN
Pars2	46.2543	0.227168	0.153917	1.47591	0.139967	0.75589	CA-CN
Bcl6	703.926	0.227116	0.127521	1.78101	0.0749105	0.6196	CA-CN
Cluap1	116.872	0.227073	0.15354	1.47892	0.139161	0.75589	CA-CN
Snrnp25	111.184	0.226996	0.155454	1.46021	0.144232	0.761762	CA-CN
Ints6	366.738	0.226869	0.129984	1.74537	0.0809206	0.642092	CA-CN
Fam210a	319.182	0.226828	0.139445	1.62665	0.103811	0.693693	CA-CN
Kifc5b	89.3559	0.226793	0.154322	1.46961	0.141667	0.757458	CA-CN
Rcc1	520.143	0.226533	0.125798	1.80076	0.0717411	0.610319	CA-CN
Gatsl2	141.379	0.226513	0.155419	1.45744	0.144996	0.764421	CA-CN
2610301B20Rik	56.964	0.22642	0.155929	1.45207	0.146481	0.768263	CA-CN
Nptxr	25.6143	0.226082	0.137	1.65023	0.0988964	0.680672	CA-CN
Alms1	232.483	0.226025	0.138329	1.63396	0.102267	0.690555	CA-CN
Foxo1	249.195	0.225928	0.142645	1.58385	0.113228	0.713327	CA-CN
Fsd1l	160.315	0.225683	0.147012	1.53513	0.124751	0.740068	CA-CN
Wbp4	329.888	0.225529	0.128094	1.76066	0.0782965	0.633144	CA-CN
Galk1	74.1313	0.225178	0.155535	1.44777	0.147682	0.770986	CA-CN
B4gat1	138.352	0.225152	0.150304	1.49798	0.134139	0.749018	CA-CN
Foxp4	170.626	0.225103	0.15573	1.44547	0.148326	0.771049	CA-CN
Slc20a1	525.551	0.225017	0.125363	1.79492	0.0726671	0.613804	CA-CN
Synj2	59.5744	0.224964	0.156021	1.44188	0.149336	0.771049	CA-CN
Cux1	1081.43	0.22493	0.113102	1.98875	0.0467294	0.527457	CA-CN
Chrnb2	33.3284	0.224837	0.149602	1.50291	0.132864	0.747351	CA-CN
Tsr1	217.24	0.224728	0.14037	1.60097	0.109383	0.708149	CA-CN
Soga1	111.075	0.224294	0.155467	1.44271	0.149103	0.771049	CA-CN
Erf	218.093	0.224114	0.139208	1.60992	0.107415	0.704487	CA-CN
Zfp287	28.9461	0.223881	0.140758	1.59054	0.111714	0.710742	CA-CN
Cyp7b1	8.47467	0.223777	0.0941652	2.37643	0.0174811	0.339669	CA-CN
Spag7	237.086	0.223383	0.140081	1.59467	0.110785	0.710269	CA-CN
Ppp1r37	337.99	0.223298	0.123572	1.80703	0.0707581	0.609295	CA-CN
Spef1	52.3869	0.223259	0.153549	1.45399	0.145948	0.766532	CA-CN
Tspyl4	47.2885	0.223124	0.155406	1.43575	0.151074	0.771049	CA-CN
Xxylt1	214.881	0.223074	0.140899	1.58322	0.113371	0.713327	CA-CN
Ddx1	413.403	0.223063	0.128665	1.73368	0.0829757	0.644052	CA-CN
Dolpp1	220.649	0.222835	0.138765	1.60585	0.108307	0.706209	CA-CN
Dgke	60.1912	0.222771	0.154944	1.43775	0.150504	0.771049	CA-CN
Cbr1	27.7187	0.222763	0.143962	1.54737	0.121773	0.735123	CA-CN
Cox17	113.342	0.222504	0.155393	1.43188	0.152179	0.772364	CA-CN
Matk	77.8523	0.222104	0.155723	1.42628	0.153789	0.773702	CA-CN
Aunip	64.3045	0.222048	0.154354	1.43856	0.150275	0.771049	CA-CN
Mzt2	74.2837	0.221849	0.154577	1.4352	0.151231	0.771049	CA-CN
Mirt1	126.193	0.221753	0.150881	1.46972	0.141638	0.757458	CA-CN
Med18	119.941	0.221712	0.149197	1.48604	0.137269	0.75348	CA-CN
Gclm	239.346	0.221693	0.136262	1.62696	0.103745	0.693693	CA-CN
Cirbp	164.773	0.221383	0.141749	1.56179	0.118337	0.725703	CA-CN
Utp20	383.785	0.221303	0.136135	1.62561	0.104033	0.694103	CA-CN
Dhcr24	297.813	0.220999	0.153007	1.44437	0.148635	0.771049	CA-CN
Thumpd1	252.995	0.220802	0.131838	1.67479	0.0939751	0.672448	CA-CN
Grik5	61.9788	0.220709	0.155905	1.41567	0.156873	0.777129	CA-CN
Etaa1	238.131	0.22038	0.14781	1.49097	0.135969	0.752552	CA-CN
Mtfp1	8.16872	0.22026	0.0991922	2.22054	0.0263822	0.401699	CA-CN
Fam216a	46.4756	0.220201	0.154911	1.42147	0.155181	0.776006	CA-CN
Asah2	80.4803	0.219977	0.154341	1.42526	0.154081	0.773702	CA-CN
Tlr5	161.609	0.219929	0.146799	1.49817	0.134089	0.749018	CA-CN
Snx32	78.681	0.219927	0.156024	1.40957	0.158667	0.782247	CA-CN
5730455P16Rik	235.545	0.219861	0.144834	1.51802	0.12901	0.744421	CA-CN
Zfp382	333.563	0.219383	0.125197	1.7523	0.0797221	0.638018	CA-CN
Syce2	108.466	0.219265	0.153678	1.42678	0.153643	0.773702	CA-CN
Aspm	1006.77	0.219237	0.120251	1.82316	0.0682793	0.600656	CA-CN
Hebp1	18.6114	0.219152	0.116265	1.88494	0.0594376	0.566485	CA-CN
Tmem79	29.6808	0.218983	0.149438	1.46537	0.14282	0.758553	CA-CN
Trim65	187.945	0.21883	0.144515	1.51424	0.129965	0.744421	CA-CN
Uck2	322.326	0.218681	0.13307	1.64335	0.100311	0.684036	CA-CN
Agpat3	69.7142	0.21832	0.155605	1.40304	0.160606	0.786093	CA-CN
Bcdin3d	43.7302	0.218255	0.153872	1.41841	0.15607	0.776832	CA-CN
Gm10684	40.2508	0.218126	0.148752	1.46637	0.142547	0.757738	CA-CN
2610206C17Rik	16.9084	0.217993	0.130612	1.66901	0.095115	0.673684	CA-CN
Smo	43.0222	0.217867	0.151317	1.4398	0.149923	0.771049	CA-CN
Lonp2	610.783	0.21769	0.117479	1.85302	0.0638797	0.583741	CA-CN
Map1lc3a	57.8554	0.217679	0.155908	1.39621	0.162652	0.789182	CA-CN
6530402F18Rik	474.772	0.217446	0.126352	1.72095	0.0852597	0.65108	CA-CN
Taf6l	180.76	0.217395	0.143293	1.51713	0.129234	0.744421	CA-CN
Zfp687	319.361	0.217179	0.130191	1.66815	0.0952855	0.673728	CA-CN
Mrps10	60.9533	0.21713	0.156046	1.39145	0.16409	0.790561	CA-CN
Scn1b	7.5696	0.216968	0.0969778	2.23729	0.0252673	0.394819	CA-CN
Cenpa	793.872	0.216936	0.107846	2.01153	0.0442699	0.512955	CA-CN
Slc26a2	407.5	0.216697	0.127802	1.69556	0.0899684	0.66006	CA-CN
Caskin2	77.8319	0.216646	0.155138	1.39647	0.162572	0.789182	CA-CN
Spout1	133.259	0.216585	0.154226	1.40434	0.160218	0.785675	CA-CN
Carhsp1	309.171	0.216522	0.13259	1.63302	0.102464	0.691089	CA-CN
Cdyl2	162.058	0.216421	0.149196	1.45058	0.146896	0.769377	CA-CN
Rex1bd	151.778	0.21641	0.150214	1.44067	0.149677	0.771049	CA-CN
Asph	413.492	0.216395	0.12645	1.71131	0.0870237	0.653718	CA-CN
Fcho1	485.461	0.216244	0.138248	1.56417	0.117777	0.724925	CA-CN
Msl3l2	27.9941	0.216212	0.146121	1.47968	0.138959	0.75589	CA-CN
D10Wsu102e	274.872	0.216153	0.133534	1.61871	0.105509	0.698842	CA-CN
Rasgrp1	34.3221	0.216153	0.120773	1.78974	0.0734958	0.61467	CA-CN
Dmxl2	538.985	0.216133	0.135186	1.59878	0.109869	0.708634	CA-CN
Fcrl1	48.3387	0.21591	0.152036	1.42012	0.155572	0.776006	CA-CN
Mrm3	27.3512	0.215907	0.143597	1.50356	0.132696	0.747231	CA-CN
Cd2	6.51677	0.215887	0.0899887	2.39905	0.0164377	0.333196	CA-CN
LOC105246506	224.713	0.215731	0.137701	1.56667	0.117193	0.722901	CA-CN
Mad2l2	109.99	0.215622	0.151518	1.42308	0.154713	0.775279	CA-CN
Ccdc134	162.651	0.215618	0.150202	1.43552	0.15114	0.771049	CA-CN
Itpkc	81.932	0.215479	0.155353	1.38703	0.165432	0.790986	CA-CN
Qsox2	89.4249	0.215312	0.156053	1.37974	0.167668	0.794956	CA-CN
Pdap1	398.324	0.215218	0.119947	1.79428	0.0727684	0.613804	CA-CN
Miip	377.697	0.215058	0.119431	1.80069	0.0717515	0.610319	CA-CN
Dctpp1	147.927	0.214974	0.147915	1.45336	0.146123	0.767039	CA-CN
Polk	151.628	0.214968	0.149533	1.43759	0.150549	0.771049	CA-CN
Cinp	181.345	0.214961	0.146092	1.47141	0.14118	0.757277	CA-CN
Timm22	158.169	0.214594	0.144064	1.48957	0.136336	0.752698	CA-CN
Faap24	110.582	0.214473	0.154542	1.3878	0.165198	0.790561	CA-CN
Jmjd6	219.315	0.214402	0.147363	1.45493	0.14569	0.766532	CA-CN
Cenpv	28.1943	0.214049	0.147812	1.44811	0.147585	0.770835	CA-CN
Fam122a	138.598	0.214029	0.149977	1.42708	0.153557	0.773702	CA-CN
Cbx8	114.04	0.21399	0.151031	1.41686	0.156524	0.777129	CA-CN
Kif15	1256.12	0.213746	0.108292	1.9738	0.0484048	0.533602	CA-CN
Polh	400.742	0.213692	0.141239	1.51298	0.130284	0.744421	CA-CN
Nup205	1286.07	0.21367	0.101682	2.10135	0.0356107	0.464699	CA-CN
Tssc4	159.766	0.213543	0.150655	1.41742	0.156359	0.777129	CA-CN
Ppargc1b	57.0805	0.213474	0.155488	1.37293	0.169773	0.798271	CA-CN
Snhg20	81.4776	0.213351	0.155985	1.36776	0.171386	0.799874	CA-CN
Rai14	47.791	0.213177	0.150239	1.41892	0.155924	0.776832	CA-CN
Glrx2	209.148	0.213077	0.145852	1.46091	0.144039	0.761457	CA-CN
Ogg1	126.832	0.213044	0.154384	1.37996	0.167599	0.794956	CA-CN
Ssh3	349.948	0.21298	0.120819	1.76279	0.0779352	0.630859	CA-CN
Mpst	219.375	0.212972	0.14159	1.50414	0.132544	0.747231	CA-CN
Gm9833	42.1773	0.212822	0.153321	1.38808	0.165114	0.790561	CA-CN
Wdr62	336.622	0.21282	0.136263	1.56184	0.118327	0.725703	CA-CN
Ppil1	288.492	0.212741	0.139799	1.52176	0.128069	0.744421	CA-CN
A530088E08Rik	77.6493	0.21255	0.156053	1.36203	0.173188	0.802096	CA-CN
Abl2	388.609	0.21255	0.127209	1.67088	0.0947459	0.673684	CA-CN
Zfp335	576.167	0.212541	0.125484	1.69377	0.0903083	0.660413	CA-CN
Gstt2	21.4956	0.212519	0.132478	1.60419	0.108672	0.706558	CA-CN
Serpinb6a	67.7833	0.212482	0.156026	1.36184	0.17325	0.802096	CA-CN
Tmem250-ps	335.256	0.212469	0.137792	1.54195	0.123085	0.738027	CA-CN
Gpr15	139.072	0.212369	0.152113	1.39612	0.162678	0.789182	CA-CN
Cdc34	317.833	0.212253	0.12853	1.65139	0.0986583	0.679733	CA-CN
Tatdn3	90.2477	0.21221	0.155986	1.36044	0.173689	0.802096	CA-CN
Fam114a1	178.226	0.211654	0.13979	1.51409	0.130003	0.744421	CA-CN
Clec1a	10.9633	0.211616	0.109146	1.93883	0.0525217	0.541146	CA-CN
Ctnnd1	734.37	0.211411	0.11799	1.79176	0.0731715	0.613804	CA-CN
3110009E18Rik	21.114	0.211337	0.124124	1.70263	0.0886377	0.655397	CA-CN
Ncapd3	1232.99	0.211316	0.110014	1.92081	0.0547558	0.551361	CA-CN
Gm20604	133.408	0.211047	0.147324	1.43254	0.151989	0.771747	CA-CN
Slc35d2	141.756	0.211036	0.148576	1.42038	0.155496	0.776006	CA-CN
Nt5c2	385.431	0.210852	0.124381	1.69521	0.0900364	0.660131	CA-CN
Mpi	133.646	0.210837	0.146524	1.43893	0.15017	0.771049	CA-CN
Cep19	67.7272	0.210734	0.156042	1.35049	0.176857	0.805269	CA-CN
Srd5a1	41.0714	0.21071	0.151349	1.39221	0.163858	0.790503	CA-CN
Zfp512b	240.259	0.210657	0.131286	1.60457	0.108589	0.70642	CA-CN
Oraov1	132.949	0.210423	0.149224	1.41012	0.158505	0.782247	CA-CN
Nmnat3	32.3675	0.210133	0.147848	1.42128	0.155237	0.776006	CA-CN
Aph1a	125.43	0.21013	0.153286	1.37083	0.170427	0.799726	CA-CN
Alkbh7	68.8319	0.210069	0.155956	1.34698	0.177987	0.805329	CA-CN
Arl6ip4	241.458	0.209887	0.140333	1.49564	0.134749	0.749823	CA-CN
Zfp503	52.496	0.209785	0.150056	1.39804	0.162101	0.789131	CA-CN
Dlgap5	595.67	0.209753	0.12192	1.72041	0.0853575	0.65108	CA-CN
Nudcd1	148.603	0.209611	0.143067	1.46512	0.142887	0.758554	CA-CN
Ube2h	287.627	0.209571	0.138521	1.51292	0.1303	0.744421	CA-CN
Leng9	67.5952	0.209386	0.155699	1.34482	0.178684	0.807122	CA-CN
5830432E09Rik	89.5041	0.209306	0.152665	1.37102	0.170368	0.799726	CA-CN
Ppp1r3b	117.61	0.20912	0.150244	1.39187	0.163962	0.790561	CA-CN
Hes1	13.5944	0.209106	0.100747	2.07555	0.0379355	0.478929	CA-CN
Pafah2	77.8069	0.208762	0.156015	1.33809	0.180869	0.809401	CA-CN
Rabl3	96.9852	0.208712	0.151436	1.37822	0.168134	0.794956	CA-CN
Agap2	287.565	0.208475	0.133043	1.56698	0.117119	0.72284	CA-CN
Wdr4	122.764	0.208174	0.150359	1.38451	0.166202	0.792231	CA-CN
Atp5k	114.174	0.207927	0.152001	1.36793	0.171333	0.799874	CA-CN
Bricd5	97.428	0.207848	0.153072	1.35784	0.174514	0.802676	CA-CN
Paxx	118.096	0.207626	0.150005	1.38413	0.166317	0.792231	CA-CN
Frs2	456.724	0.207619	0.120348	1.72516	0.0844982	0.650291	CA-CN
Serac1	75.137	0.207582	0.155026	1.33901	0.180567	0.8091	CA-CN
Hdgfl2	300.92	0.207428	0.133992	1.54806	0.121608	0.73452	CA-CN
Trip6	164.217	0.207253	0.15378	1.34773	0.177746	0.805329	CA-CN
Tyms	346.059	0.207174	0.123726	1.67446	0.0940393	0.672482	CA-CN
Ago1	454.575	0.207128	0.125118	1.65546	0.0978309	0.67909	CA-CN
Ogfod2	115.296	0.207104	0.149879	1.3818	0.167032	0.793629	CA-CN
Prmt5	239.351	0.206994	0.145498	1.42266	0.154836	0.775279	CA-CN
Ctsl	332.881	0.206821	0.137925	1.49952	0.133738	0.748866	CA-CN
D730003I15Rik	18.3025	0.20669	0.130805	1.58015	0.114073	0.713778	CA-CN
Ece1	609.6	0.206261	0.142264	1.44984	0.147102	0.769377	CA-CN
Fhod1	469.436	0.20601	0.120247	1.71323	0.0866705	0.653115	CA-CN
Rad51	237.548	0.205967	0.140352	1.4675	0.142239	0.757698	CA-CN
Haspin	257.835	0.205855	0.13667	1.50622	0.132011	0.746654	CA-CN
Morc2a	374.584	0.205793	0.137642	1.49513	0.134879	0.749823	CA-CN
Zfand1	32.4492	0.205768	0.151242	1.36052	0.173665	0.802096	CA-CN
Myg1	241.601	0.205374	0.136026	1.50982	0.13109	0.74558	CA-CN
Fam83d	146.431	0.205316	0.147709	1.39	0.164528	0.790561	CA-CN
Nop2	224.46	0.205193	0.13508	1.51905	0.12875	0.744421	CA-CN
Eif1ad	338.214	0.204801	0.125807	1.6279	0.103547	0.693563	CA-CN
Tcf20	857.825	0.204714	0.113595	1.80213	0.0715247	0.610319	CA-CN
Ncaph	775.07	0.204674	0.134189	1.52527	0.127193	0.744421	CA-CN
Pus7l	77.4806	0.20464	0.155869	1.31289	0.189219	0.820903	CA-CN
2210016L21Rik	130.445	0.204571	0.149795	1.36567	0.172043	0.800299	CA-CN
Agap3	297.346	0.204545	0.143341	1.42698	0.153584	0.773702	CA-CN
Ncam1	254.452	0.204151	0.141739	1.44033	0.149774	0.771049	CA-CN
Gtf3c1	531.29	0.204149	0.147998	1.3794	0.16777	0.794956	CA-CN
Cars	207.793	0.204055	0.145053	1.40676	0.159498	0.78384	CA-CN
H2afj	464.108	0.203903	0.1277	1.59673	0.110325	0.709227	CA-CN
Gadd45b	155.491	0.203842	0.14535	1.40242	0.16079	0.786093	CA-CN
B230217C12Rik	8.03517	0.203466	0.100584	2.02285	0.0430889	0.511136	CA-CN
Hist1h2bc	63.4454	0.203431	0.152413	1.33473	0.181963	0.80984	CA-CN
Msi2	112.715	0.203329	0.150806	1.34828	0.177568	0.805329	CA-CN
Olfml2b	14.9763	0.203267	0.122055	1.66538	0.0958369	0.674675	CA-CN
Armc5	281.044	0.203199	0.139074	1.46109	0.14399	0.761457	CA-CN
Mthfsl	28.2319	0.203156	0.136617	1.48705	0.137001	0.752913	CA-CN
Slc37a1	113.73	0.203146	0.15325	1.32558	0.184978	0.81461	CA-CN
Mybl1	101.091	0.203135	0.151927	1.33706	0.181203	0.809489	CA-CN
Tmem115	256.466	0.203093	0.135794	1.4956	0.134759	0.749823	CA-CN
Nt5dc2	198.179	0.203053	0.151739	1.33817	0.180841	0.809401	CA-CN
Ikbke	901.731	0.203006	0.118838	1.70825	0.0875894	0.654541	CA-CN
Sh3glb2	236.643	0.202971	0.134112	1.51344	0.130167	0.744421	CA-CN
Gxylt1	772.575	0.202711	0.11447	1.77087	0.0765829	0.625842	CA-CN
Wdr83	117.671	0.20269	0.149327	1.35735	0.17467	0.80294	CA-CN
Ccl4	29.88	0.202649	0.134641	1.50511	0.132296	0.746758	CA-CN
Hist1h1d	20.3348	0.202579	0.131542	1.54003	0.123554	0.738172	CA-CN
Cpeb3	38.0008	0.202564	0.151285	1.33895	0.180587	0.8091	CA-CN
Ctsg	358.495	0.202481	0.139982	1.44648	0.148041	0.771049	CA-CN
Med1	1010.91	0.202465	0.10099	2.00479	0.044985	0.517295	CA-CN
Slc39a13	144.232	0.202457	0.1444	1.40206	0.160899	0.786136	CA-CN
Cnnm2	43.0265	0.202353	0.149873	1.35016	0.176966	0.805269	CA-CN
4933439C10Rik	62.2389	0.202269	0.155828	1.29803	0.194277	0.825023	CA-CN
Slc25a1	203	0.201954	0.140926	1.43305	0.151844	0.771358	CA-CN
Lif	21.0389	0.201853	0.118402	1.70481	0.0882295	0.65485	CA-CN
Gm16104	10.46	0.201584	0.115739	1.74171	0.081559	0.642092	CA-CN
Cyth2	282.89	0.201518	0.131095	1.5372	0.124245	0.738229	CA-CN
A530099J19Rik	14.756	0.201412	0.127347	1.5816	0.11374	0.713618	CA-CN
Pla2g4b	38.2413	0.201265	0.152031	1.32384	0.185555	0.815367	CA-CN
Cenpn	260.692	0.201125	0.141977	1.4166	0.1566	0.777129	CA-CN
Acat2	92.9929	0.200946	0.152247	1.31987	0.186878	0.81687	CA-CN
Cfh	1040.26	0.200805	0.128477	1.56296	0.118062	0.725634	CA-CN
Tmem37	6.3467	0.200791	0.0908932	2.20909	0.0271684	0.406556	CA-CN
Gale	122.057	0.200739	0.150001	1.33825	0.180815	0.809401	CA-CN
Nr2f6	213.613	0.20073	0.148734	1.34959	0.177149	0.805269	CA-CN
Abhd11	296.179	0.200689	0.132736	1.51195	0.130548	0.744421	CA-CN
Samm50	558.785	0.200606	0.111353	1.80153	0.0716193	0.610319	CA-CN
Gm10768	23.9146	0.200509	0.13315	1.50589	0.132096	0.746654	CA-CN
Pdzd3	10.6148	0.200445	0.104187	1.92389	0.0543683	0.548679	CA-CN
Tpx2	1166.55	0.200395	0.0973608	2.05827	0.0395644	0.489172	CA-CN
Rps4l	63.886	0.200374	0.156042	1.2841	0.199106	0.826053	CA-CN
Smyd2	74.4487	0.200333	0.156053	1.28375	0.199231	0.826162	CA-CN
Glrx5	171.857	0.20017	0.143117	1.39865	0.161918	0.789131	CA-CN
Rhbdl1	47.3249	0.200158	0.155303	1.28882	0.19746	0.825959	CA-CN
Mvk	91.1992	0.200116	0.153915	1.30018	0.19354	0.823995	CA-CN
Rsph3b	24.5451	0.200065	0.134297	1.48971	0.136299	0.752698	CA-CN
Tmem144	28.5379	0.200016	0.14663	1.36409	0.17254	0.801619	CA-CN
Ap1s1	474.81	0.199946	0.120217	1.66321	0.0962712	0.674854	CA-CN
Tcerg1	669.935	0.199941	0.121251	1.64899	0.0991502	0.680827	CA-CN
Foxd2os	75.9315	0.199921	0.156051	1.28113	0.200149	0.826736	CA-CN
Ift80	200.876	0.199757	0.138793	1.43925	0.150081	0.771049	CA-CN
Wdr90	241.19	0.199746	0.146951	1.35927	0.17406	0.802096	CA-CN
Sco1	149.215	0.199687	0.149652	1.33434	0.182091	0.80984	CA-CN
Hlx	312.887	0.199575	0.139747	1.42811	0.15326	0.773702	CA-CN
Mast1	66.0813	0.199447	0.155953	1.27889	0.200936	0.828034	CA-CN
Tyw1	200.502	0.199319	0.145873	1.36638	0.171819	0.800299	CA-CN
Hspa9	679.744	0.199109	0.12551	1.5864	0.112648	0.712742	CA-CN
Egln2	320.938	0.199071	0.132216	1.50565	0.132158	0.746654	CA-CN
Fam120aos	96.3238	0.199031	0.156003	1.27581	0.202023	0.828034	CA-CN
Ercc6l	676.694	0.198947	0.116117	1.71334	0.0866496	0.653115	CA-CN
Cbx1	198.551	0.198909	0.141121	1.40949	0.15869	0.782247	CA-CN
2700062C07Rik	63.1714	0.198781	0.156039	1.27392	0.202692	0.828034	CA-CN
Ccdc86	164.898	0.198504	0.154386	1.28576	0.198527	0.826016	CA-CN
Cxcl16	14.098	0.198448	0.124178	1.5981	0.110021	0.70881	CA-CN
Pycrl	146.676	0.198412	0.144084	1.37705	0.168496	0.795573	CA-CN
Mfsd13a	191.296	0.197981	0.147452	1.34268	0.179377	0.807122	CA-CN
Timm17b	186.927	0.197974	0.138923	1.42506	0.154139	0.773702	CA-CN
Tnpo2	629.04	0.197839	0.118748	1.66604	0.0957053	0.674588	CA-CN
Dvl3	447.727	0.197735	0.117906	1.67705	0.0935326	0.672435	CA-CN
Zkscan6	173.877	0.197681	0.149302	1.32403	0.185493	0.815367	CA-CN
Pex11g	6.93369	0.197658	0.0848201	2.33032	0.0197894	0.353389	CA-CN
Mustn1	17.4582	0.197577	0.1266	1.56064	0.118609	0.725703	CA-CN
Zwilch	325.414	0.197446	0.130724	1.51041	0.13094	0.745505	CA-CN
BC049352	18.8967	0.197351	0.131495	1.50083	0.133401	0.748866	CA-CN
4933433G19Rik	28.3996	0.197265	0.144026	1.36965	0.170798	0.799874	CA-CN
Cenpp	70.4935	0.197116	0.155993	1.26362	0.206365	0.828034	CA-CN
Ppp5c	424.583	0.197052	0.12379	1.59183	0.111423	0.710697	CA-CN
Necab3	14.8683	0.197039	0.126309	1.55997	0.118766	0.725878	CA-CN
C330007P06Rik	234.572	0.196955	0.132361	1.48801	0.136747	0.752836	CA-CN
Fzr1	586.097	0.196864	0.134467	1.46403	0.143185	0.759396	CA-CN
Aatf	145.751	0.196821	0.143285	1.37364	0.169555	0.798157	CA-CN
Pced1a	182.513	0.196702	0.138553	1.41968	0.155701	0.776309	CA-CN
Insl3	16.5151	0.196679	0.131365	1.49719	0.134343	0.749529	CA-CN
Cyp4f13	154.784	0.196532	0.147754	1.33013	0.183476	0.812394	CA-CN
Xntrpc	133.631	0.196505	0.148345	1.32464	0.185289	0.815	CA-CN
Sgf29	158.326	0.196388	0.149015	1.3179	0.187536	0.81757	CA-CN
Gm5901	19.7054	0.196224	0.115049	1.70557	0.0880881	0.65485	CA-CN
Abtb2	87.1588	0.196216	0.153175	1.28099	0.200199	0.826736	CA-CN
Sntb2	291.17	0.196127	0.136309	1.43885	0.150194	0.771049	CA-CN
Zfp668	217.04	0.196116	0.144217	1.35987	0.17387	0.802096	CA-CN
Caml	147.107	0.196103	0.149428	1.31236	0.189399	0.821263	CA-CN
Abhd10	140.339	0.196083	0.147492	1.32945	0.183699	0.81277	CA-CN
Map3k10	127.183	0.195756	0.146974	1.33191	0.18289	0.811192	CA-CN
Eif2d	286.126	0.195294	0.144397	1.35248	0.176222	0.805019	CA-CN
Txnl4b	150.936	0.195203	0.143931	1.35623	0.175027	0.80328	CA-CN
Gm38426	8.49856	0.195185	0.10059	1.9404	0.0523315	0.541146	CA-CN
Tars2	185.643	0.195068	0.151296	1.28931	0.19729	0.825959	CA-CN
Mphosph6	77.4434	0.195013	0.155578	1.25347	0.210034	0.830606	CA-CN
Pygb	517.499	0.194839	0.125688	1.55018	0.121098	0.734267	CA-CN
Rad50	485.004	0.194812	0.116739	1.66878	0.0951602	0.673684	CA-CN
Gm15760	33.3548	0.194768	0.137483	1.41667	0.156578	0.777129	CA-CN
Efl1	143.875	0.194765	0.150952	1.29025	0.196965	0.825959	CA-CN
Med16	375.711	0.194707	0.144395	1.34844	0.177518	0.805329	CA-CN
Elane	556.97	0.194578	0.130792	1.4877	0.136831	0.752836	CA-CN
Pqlc2	138.927	0.194502	0.146509	1.32758	0.184317	0.814157	CA-CN
Pkp4	164.974	0.194489	0.149291	1.30275	0.192659	0.822779	CA-CN
Skp2	283.839	0.194446	0.126233	1.54038	0.123469	0.738172	CA-CN
Mbnl3	933.368	0.194255	0.107714	1.80344	0.0713191	0.610319	CA-CN
Mfap3l	41.7794	0.194243	0.152354	1.27494	0.202329	0.828034	CA-CN
Knstrn	667.247	0.194117	0.120769	1.60734	0.10798	0.705815	CA-CN
Dhodh	106.815	0.194098	0.154734	1.25439	0.209699	0.830427	CA-CN
Zbtb43	333.09	0.194042	0.132112	1.46877	0.141895	0.757458	CA-CN
Clstn1	42.4487	0.194014	0.146674	1.32276	0.185917	0.815855	CA-CN
Hexim2	12.8511	0.193916	0.105457	1.83881	0.0659438	0.590208	CA-CN
Taf9	190.367	0.193845	0.14985	1.29359	0.195806	0.825725	CA-CN
Snrnp40	446.793	0.19376	0.120397	1.60934	0.107542	0.704879	CA-CN
Gss	207.599	0.193692	0.143338	1.3513	0.1766	0.805269	CA-CN
Yipf2	256.694	0.193681	0.14216	1.36242	0.173065	0.802096	CA-CN
Nup107	583.109	0.193669	0.119259	1.62395	0.104387	0.695726	CA-CN
Med19	183.688	0.193576	0.142203	1.36126	0.17343	0.802096	CA-CN
Gins2	158.033	0.193555	0.15189	1.27431	0.202554	0.828034	CA-CN
Ppm1m	576.324	0.193516	0.112244	1.72407	0.0846951	0.650921	CA-CN
Fdps	75.9545	0.193362	0.155816	1.24096	0.214619	0.832697	CA-CN
Lhfpl2	24.8134	0.193295	0.12986	1.48849	0.136621	0.752836	CA-CN
Tars	456.029	0.193196	0.115728	1.66939	0.0950397	0.673684	CA-CN
Aatk	196.565	0.193051	0.141496	1.36435	0.172456	0.801559	CA-CN
Rgs12	130.397	0.192995	0.150283	1.28421	0.199068	0.826053	CA-CN
Plcb4	38.6997	0.192963	0.153084	1.2605	0.207488	0.828034	CA-CN
Urb1	211.998	0.192905	0.143961	1.33998	0.18025	0.808233	CA-CN
Tnfrsf4	11.545	0.192899	0.109779	1.75715	0.0788927	0.63403	CA-CN
Psmg1	78.0817	0.19287	0.155302	1.2419	0.214273	0.832697	CA-CN
Gm16907	24.2099	0.192868	0.130657	1.47614	0.139907	0.75589	CA-CN
Fam189b	160.386	0.192849	0.152849	1.26169	0.207059	0.828034	CA-CN
Zfp574	235.722	0.192824	0.152276	1.26628	0.205411	0.828034	CA-CN
C1ra	39.6743	0.192661	0.153595	1.25434	0.209717	0.830427	CA-CN
Heatr1	658.55	0.192402	0.107961	1.78214	0.0747259	0.618868	CA-CN
Ehhadh	20.6826	0.192257	0.135857	1.41514	0.157028	0.777355	CA-CN
Gtpbp6	162.871	0.192121	0.143148	1.34211	0.179559	0.807122	CA-CN
Rrp9	79.1237	0.191951	0.156036	1.23017	0.218633	0.837899	CA-CN
Timm13	182.559	0.191839	0.141872	1.35219	0.176315	0.805019	CA-CN
Taco1	120.035	0.191799	0.151508	1.26593	0.205538	0.828034	CA-CN
Sbk1	333.543	0.191685	0.150774	1.27134	0.203608	0.828034	CA-CN
Pitpnm2	61.7204	0.191672	0.15343	1.24925	0.211575	0.831399	CA-CN
Prtn3	932.296	0.191533	0.12561	1.52483	0.127302	0.744421	CA-CN
Aldh16a1	622.469	0.191464	0.124804	1.53412	0.124999	0.740422	CA-CN
Chsy1	703.354	0.191257	0.129087	1.48162	0.138442	0.755642	CA-CN
Ccdc97	681.963	0.191251	0.130653	1.46381	0.143247	0.759396	CA-CN
Ybey	56.218	0.191128	0.156053	1.22476	0.220666	0.839019	CA-CN
Elac2	194.893	0.190979	0.150413	1.2697	0.204192	0.828034	CA-CN
Romo1	64.3938	0.190838	0.155931	1.22386	0.221004	0.839019	CA-CN
Slc25a23	29.7694	0.190838	0.127313	1.49897	0.133882	0.749018	CA-CN
Cstf2	467.5	0.190554	0.12219	1.55949	0.11888	0.726183	CA-CN
Dph5	63.9064	0.190405	0.155982	1.22069	0.222205	0.839019	CA-CN
Zfp579	21.7517	0.190304	0.121934	1.56071	0.118593	0.725703	CA-CN
Ddx28	146.042	0.19029	0.145629	1.30668	0.191321	0.822455	CA-CN
Pacrgl	42.7442	0.190212	0.15321	1.24151	0.214417	0.832697	CA-CN
Pls3	49.9385	0.190185	0.155276	1.22482	0.220642	0.839019	CA-CN
Ppcdc	165.11	0.190155	0.150526	1.26327	0.206491	0.828034	CA-CN
Kpna6	729.566	0.190146	0.119948	1.58524	0.112912	0.713125	CA-CN
Pomt1	193.596	0.190137	0.141698	1.34185	0.179646	0.807122	CA-CN
Tedc2	140.281	0.190094	0.146883	1.29419	0.195601	0.825725	CA-CN
Ctnnbl1	312.318	0.190072	0.132265	1.43706	0.150702	0.771049	CA-CN
Tldc1	54.4041	0.189901	0.156047	1.21695	0.223624	0.840202	CA-CN
Ncapg2	1159	0.189886	0.108903	1.74362	0.0812254	0.642092	CA-CN
Zfp691	40.5666	0.189809	0.151965	1.24903	0.211653	0.831399	CA-CN
Zfp330	137.903	0.189788	0.14892	1.27442	0.202514	0.828034	CA-CN
Gm14057	11.2272	0.189619	0.114756	1.65236	0.0984611	0.679616	CA-CN
Triobp	530.769	0.189583	0.130323	1.45471	0.145749	0.766532	CA-CN
Malsu1	103.247	0.189549	0.153919	1.23148	0.218142	0.837287	CA-CN
Cnot9	687.128	0.189332	0.128327	1.47539	0.140109	0.756086	CA-CN
Zfp111	99.648	0.189321	0.155232	1.2196	0.222617	0.839208	CA-CN
Dok2	104.639	0.18922	0.154494	1.22477	0.220661	0.839019	CA-CN
5031425E22Rik	149.946	0.189192	0.147426	1.2833	0.199387	0.826162	CA-CN
Ykt6	696.489	0.189156	0.105583	1.79153	0.0732081	0.613804	CA-CN
Mtbp	163.731	0.189119	0.143417	1.31867	0.18728	0.8174	CA-CN
Scamp3	441.616	0.189102	0.145983	1.29537	0.195193	0.825725	CA-CN
Rangap1	928.806	0.189097	0.137382	1.37643	0.168688	0.795818	CA-CN
Cyb5d2	77.8205	0.188712	0.156053	1.20928	0.226556	0.84381	CA-CN
2500002B13Rik	118.482	0.188699	0.151602	1.2447	0.213242	0.832697	CA-CN
Acsl3	94.6309	0.188669	0.155848	1.2106	0.226049	0.84381	CA-CN
Fus	671.56	0.188507	0.114556	1.64554	0.0998587	0.682187	CA-CN
Gm14137	17.9759	0.188286	0.118244	1.59236	0.111305	0.710697	CA-CN
Smyd4	69.6993	0.188154	0.155948	1.20652	0.227619	0.84466	CA-CN
Endog	54.3701	0.188098	0.14864	1.26546	0.205706	0.828034	CA-CN
Tmem39a	317.274	0.187972	0.124198	1.51348	0.130157	0.744421	CA-CN
Slc41a1	274.205	0.187963	0.150308	1.25052	0.21111	0.830998	CA-CN
Cpsf4	353.794	0.1879	0.129691	1.44883	0.147386	0.770151	CA-CN
Slc8a1	964.694	0.187899	0.114386	1.64268	0.10045	0.684285	CA-CN
Rfc5	320.63	0.187898	0.127929	1.46877	0.141894	0.757458	CA-CN
Mpv17l2	185.191	0.187852	0.14116	1.33077	0.183265	0.811775	CA-CN
Pik3r2	381.536	0.187648	0.13509	1.38906	0.164815	0.790561	CA-CN
Prr12	441.972	0.187624	0.139994	1.34022	0.180173	0.808205	CA-CN
Ccp110	243.498	0.1875	0.141398	1.32604	0.184826	0.81461	CA-CN
Gpc1	411.615	0.187297	0.152205	1.23056	0.218487	0.837899	CA-CN
Gtf3c5	185.75	0.187256	0.155552	1.20382	0.228658	0.845222	CA-CN
Mrps35	128.75	0.187143	0.147033	1.27279	0.203092	0.828034	CA-CN
Kmt2b	865.276	0.18689	0.118691	1.57459	0.11535	0.717403	CA-CN
Ftsj3	345.289	0.186765	0.126448	1.47702	0.139671	0.75589	CA-CN
Wdr12	64.7722	0.186661	0.155713	1.19875	0.230626	0.845222	CA-CN
Poc1a	192.218	0.186506	0.149046	1.25133	0.210814	0.830883	CA-CN
Kif2c	449.069	0.186506	0.129543	1.43972	0.149946	0.771049	CA-CN
Lpar2	64.3526	0.186414	0.156053	1.19456	0.232261	0.846213	CA-CN
Tpk1	56.739	0.186401	0.154108	1.20954	0.226455	0.84381	CA-CN
Ppm1f	243.033	0.186385	0.145522	1.2808	0.200264	0.826736	CA-CN
Bysl	474.306	0.186348	0.123732	1.50607	0.132049	0.746654	CA-CN
4930581F22Rik	159.702	0.186208	0.155738	1.19564	0.231836	0.846075	CA-CN
Rtkn2	65.6833	0.18585	0.155433	1.19569	0.231816	0.846075	CA-CN
Med25	416.51	0.185442	0.139107	1.33309	0.182502	0.810302	CA-CN
Helb	727.94	0.185421	0.106879	1.73488	0.0827621	0.644052	CA-CN
Isoc2b	55.3967	0.185294	0.155318	1.193	0.23287	0.847091	CA-CN
Yaf2	225.133	0.185107	0.141395	1.30915	0.190482	0.822178	CA-CN
Cgrrf1	143.305	0.185093	0.150086	1.23324	0.217484	0.836162	CA-CN
Terf1	183.086	0.185006	0.145068	1.2753	0.202203	0.828034	CA-CN
Rad52	110.653	0.184941	0.152803	1.21032	0.226155	0.84381	CA-CN
Nsmce2	150.712	0.184842	0.146162	1.26464	0.206	0.828034	CA-CN
Ctu1	113.219	0.184801	0.150387	1.22884	0.219132	0.839019	CA-CN
Nsmce3	161.348	0.184754	0.146943	1.25732	0.208637	0.829328	CA-CN
Cmc2	155.034	0.18467	0.143989	1.28253	0.199657	0.826162	CA-CN
Prr3	77.2167	0.184484	0.155125	1.18925	0.234339	0.848075	CA-CN
Slc17a5	230.539	0.184424	0.133981	1.37649	0.16867	0.795818	CA-CN
Pdcd11	379.588	0.184305	0.140629	1.31057	0.190003	0.822178	CA-CN
Taf9b	81.0699	0.184299	0.154952	1.1894	0.234284	0.848075	CA-CN
Carm1	399.802	0.184286	0.129054	1.42798	0.153298	0.773702	CA-CN
Usp11	64.5946	0.184234	0.155191	1.18714	0.235172	0.848916	CA-CN
Ccdc82	456.011	0.184108	0.124155	1.48288	0.138106	0.755642	CA-CN
4930426L09Rik	11.9931	0.184093	0.107347	1.71492	0.0863593	0.653115	CA-CN
Aacs	328.43	0.184081	0.137596	1.33784	0.180949	0.809442	CA-CN
Hist1h1b	26.4946	0.184059	0.142168	1.29466	0.195438	0.825725	CA-CN
Arsg	105.241	0.184008	0.156052	1.17914	0.238341	0.850315	CA-CN
Gm45927	697.222	0.183958	0.124833	1.47363	0.140582	0.756974	CA-CN
Cd14	340.562	0.18382	0.151074	1.21675	0.223697	0.840202	CA-CN
Hspb11	32.7772	0.183781	0.147998	1.24178	0.214318	0.832697	CA-CN
Stag3	114.226	0.183714	0.153751	1.19488	0.232134	0.846075	CA-CN
Fam173b	76.2492	0.183638	0.155851	1.17829	0.23868	0.850315	CA-CN
Zfp407	296.13	0.183618	0.1336	1.37439	0.169321	0.797805	CA-CN
Tada2a	93.8012	0.183528	0.153423	1.19622	0.231611	0.846075	CA-CN
Aplf	73.3916	0.1835	0.156053	1.17588	0.239642	0.850315	CA-CN
Ms4a3	50.9679	0.183319	0.143035	1.28164	0.199968	0.826736	CA-CN
1110038B12Rik	96.0239	0.183265	0.155445	1.17897	0.238412	0.850315	CA-CN
Gk5	24.9165	0.183058	0.141519	1.29352	0.19583	0.825725	CA-CN
Bard1	578.563	0.182952	0.126768	1.44321	0.148963	0.771049	CA-CN
Pole	477.051	0.182866	0.146602	1.24737	0.212262	0.832315	CA-CN
Ubfd1	466.24	0.18283	0.122779	1.4891	0.136461	0.752698	CA-CN
Jdp2	115.827	0.182784	0.155875	1.17264	0.240942	0.850472	CA-CN
Zfp1	49.5528	0.182752	0.155766	1.17325	0.240697	0.850315	CA-CN
Pfdn2	169.942	0.182722	0.140681	1.29884	0.194	0.824668	CA-CN
Cltb	143.678	0.182598	0.152779	1.19518	0.232017	0.846075	CA-CN
Maoa	34.2347	0.182598	0.143091	1.2761	0.201921	0.828034	CA-CN
Itgb5	379.669	0.18253	0.139726	1.30634	0.191436	0.822455	CA-CN
Dlat	419.38	0.182353	0.130371	1.39872	0.161896	0.789131	CA-CN
Uba52	29.0837	0.182319	0.131241	1.38919	0.164774	0.790561	CA-CN
Pex16	116.786	0.182286	0.149815	1.21674	0.223702	0.840202	CA-CN
Aurka	516.197	0.182166	0.12402	1.46884	0.141875	0.757458	CA-CN
Bola2	125.458	0.182155	0.150613	1.20942	0.2265	0.84381	CA-CN
Sap30l	181.297	0.182147	0.139492	1.30579	0.191624	0.82253	CA-CN
BC037032	69.1595	0.182133	0.155956	1.16784	0.24287	0.852493	CA-CN
Zbtb17	252.63	0.181998	0.144476	1.25971	0.207774	0.828034	CA-CN
Smg5	787.237	0.181869	0.110229	1.64992	0.0989601	0.680672	CA-CN
Ints13	375.133	0.181847	0.139038	1.3079	0.190908	0.822455	CA-CN
Cpt1a	1676.5	0.181829	0.117898	1.54226	0.123011	0.738027	CA-CN
Haus5	154.719	0.181742	0.14333	1.268	0.204798	0.828034	CA-CN
Pip5k1a	319.404	0.181627	0.130361	1.39326	0.163541	0.79008	CA-CN
Dcun1d4	51.9592	0.181618	0.155409	1.16864	0.242548	0.852423	CA-CN
Prc1	1048.49	0.181584	0.109524	1.65793	0.0973319	0.677726	CA-CN
Uevld	182.177	0.181566	0.146499	1.23937	0.215209	0.833218	CA-CN
Metrn	118.632	0.181553	0.149297	1.21605	0.223965	0.840313	CA-CN
Kif22	713.289	0.181517	0.117201	1.54877	0.121436	0.734267	CA-CN
Pign	606.585	0.18131	0.11769	1.54057	0.123422	0.738172	CA-CN
Galt	148.621	0.181248	0.145194	1.24831	0.211918	0.831904	CA-CN
Mrpl51	139.357	0.181239	0.146145	1.24013	0.214928	0.832697	CA-CN
Faap20	178.722	0.181227	0.152603	1.18757	0.235003	0.848575	CA-CN
Vac14	592.161	0.181042	0.142624	1.26936	0.204311	0.828034	CA-CN
Osgep	250.369	0.180997	0.129577	1.39682	0.162467	0.789182	CA-CN
Dcaf1	120.354	0.180994	0.149069	1.21417	0.224685	0.841396	CA-CN
Kif23	1209.19	0.180835	0.103767	1.7427	0.0813853	0.642092	CA-CN
Gosr1	605.449	0.180781	0.1122	1.61125	0.107126	0.704195	CA-CN
Lmnb2	556.641	0.180763	0.129983	1.39066	0.164327	0.790561	CA-CN
Wdr7	405.852	0.180702	0.146515	1.23333	0.217453	0.836162	CA-CN
Gmnn	286.422	0.180527	0.133091	1.35642	0.174964	0.80328	CA-CN
Nod1	625.193	0.18045	0.127463	1.41571	0.156861	0.777129	CA-CN
Coa7	53.7057	0.180445	0.150474	1.19918	0.23046	0.845222	CA-CN
Zbtb49	61.5015	0.180431	0.156047	1.15626	0.247575	0.855863	CA-CN
Cenpm	153.049	0.180392	0.1469	1.22799	0.21945	0.839019	CA-CN
Gatad2a	1008.35	0.18039	0.125702	1.43507	0.151268	0.771049	CA-CN
Fads2	9.95427	0.180385	0.103643	1.74045	0.0817809	0.642589	CA-CN
Syt11	79.0468	0.180336	0.155171	1.16217	0.245165	0.853663	CA-CN
5430416N02Rik	18.9562	0.180253	0.134891	1.33628	0.181456	0.809489	CA-CN
Gab2	722.334	0.180206	0.119463	1.50847	0.131433	0.746062	CA-CN
Sec22c	225.993	0.180076	0.145163	1.24051	0.214788	0.832697	CA-CN
Usp6nl	219.063	0.180041	0.133266	1.35099	0.1767	0.805269	CA-CN
Atf2	645.417	0.18	0.118201	1.52283	0.1278	0.744421	CA-CN
Gstz1	98.0924	0.179975	0.152948	1.17671	0.239311	0.850315	CA-CN
Ankrd9	21.9557	0.179925	0.133733	1.3454	0.178496	0.80676	CA-CN
AI506816	13.1536	0.179904	0.107974	1.66619	0.0956763	0.674588	CA-CN
Mroh1	482.593	0.179845	0.12957	1.38801	0.165133	0.790561	CA-CN
Tfip11	422.59	0.179832	0.135033	1.33176	0.182938	0.811192	CA-CN
Kif13b	172.698	0.179706	0.147144	1.22129	0.221975	0.839019	CA-CN
Gys1	176.689	0.179683	0.146414	1.22723	0.219738	0.839019	CA-CN
Mrpl19	326.029	0.17941	0.121833	1.47259	0.140862	0.757166	CA-CN
Zswim4	278.448	0.179343	0.144786	1.23868	0.215463	0.833345	CA-CN
Dhx34	371.589	0.179199	0.140266	1.27757	0.201403	0.828034	CA-CN
Alkbh4	172.834	0.178952	0.145442	1.2304	0.218546	0.837899	CA-CN
Mvd	348.466	0.178913	0.1251	1.43016	0.152671	0.773702	CA-CN
Fam3a	192.359	0.178912	0.141902	1.26081	0.207376	0.828034	CA-CN
Por	503.471	0.178899	0.132293	1.3523	0.176281	0.805019	CA-CN
Hdac4	387.617	0.178798	0.152262	1.17428	0.240284	0.850315	CA-CN
Ezr	792.163	0.17869	0.125155	1.42775	0.153364	0.773702	CA-CN
Nicn1	27.5897	0.17866	0.140262	1.27376	0.20275	0.828034	CA-CN
Pkd2	138.963	0.178569	0.146806	1.21637	0.223846	0.840202	CA-CN
Cwc15	471.729	0.17849	0.126206	1.41428	0.15728	0.778012	CA-CN
Srpk1	544.844	0.178445	0.119014	1.49936	0.13378	0.748866	CA-CN
Cdkn3	236.474	0.178367	0.141129	1.26386	0.206281	0.828034	CA-CN
Zfp865	351.763	0.178317	0.123572	1.44302	0.149015	0.771049	CA-CN
Drg2	274.266	0.178176	0.132029	1.34952	0.177169	0.805269	CA-CN
Tmem238	28.8012	0.178155	0.141984	1.25476	0.209567	0.830413	CA-CN
Fam162a	95.6023	0.178126	0.153173	1.16291	0.244866	0.853298	CA-CN
Cntrob	213.597	0.178088	0.140271	1.2696	0.204227	0.828034	CA-CN
2410022M11Rik	13.943	0.177965	0.123805	1.43747	0.150586	0.771049	CA-CN
Nectin1	271.79	0.177896	0.145764	1.22044	0.222299	0.839019	CA-CN
C130050O18Rik	369.262	0.177817	0.136982	1.29811	0.194251	0.825023	CA-CN
5430437J10Rik	27.9763	0.177727	0.143043	1.24247	0.214063	0.832697	CA-CN
Haus4	291.085	0.177667	0.13445	1.32144	0.186355	0.816198	CA-CN
Tnfaip8l1	35.9168	0.177637	0.151585	1.17186	0.241253	0.850812	CA-CN
Plpp5	206.648	0.177632	0.136639	1.30001	0.193598	0.823995	CA-CN
Irs2	194.385	0.17749	0.145423	1.22051	0.222271	0.839019	CA-CN
Scnn1a	94.4309	0.177456	0.154107	1.15151	0.249521	0.857744	CA-CN
Akap17b	37.3388	0.177366	0.148505	1.19434	0.232344	0.846213	CA-CN
Prr11	726.562	0.177352	0.114518	1.54868	0.121459	0.734267	CA-CN
Tlr6	363.764	0.17729	0.123953	1.4303	0.152631	0.773702	CA-CN
Ppat	211.048	0.177285	0.141621	1.25182	0.210635	0.830883	CA-CN
Fam220a	72.1511	0.177248	0.155566	1.13937	0.254548	0.860701	CA-CN
Zmynd19	122.601	0.177151	0.147616	1.20008	0.230108	0.845222	CA-CN
Fastkd3	95.2595	0.17703	0.153845	1.1507	0.249854	0.858042	CA-CN
Atf5	100.908	0.176993	0.154846	1.14303	0.253027	0.859314	CA-CN
Dcaf5	416.692	0.176924	0.12457	1.42028	0.155525	0.776006	CA-CN
Swi5	354.141	0.176916	0.134329	1.31703	0.187827	0.818336	CA-CN
Bri3bp	1007.47	0.176833	0.114993	1.53777	0.124104	0.738229	CA-CN
Zbtb2	138.527	0.176463	0.146246	1.20661	0.227582	0.84466	CA-CN
Orc6	235.201	0.176431	0.13618	1.29557	0.195124	0.825725	CA-CN
Cdc23	816.236	0.176372	0.109646	1.60855	0.107715	0.705603	CA-CN
Etv3	528.166	0.176356	0.116148	1.51837	0.128921	0.744421	CA-CN
Homer3	255.089	0.176262	0.137632	1.28067	0.200308	0.826736	CA-CN
2310061I04Rik	140.686	0.176127	0.148093	1.1893	0.234321	0.848075	CA-CN
Pigw	75.3789	0.176115	0.155059	1.13579	0.256044	0.863143	CA-CN
D10Jhu81e	267.527	0.17603	0.134597	1.30783	0.19093	0.822455	CA-CN
2610318N02Rik	17.2988	0.175845	0.126618	1.38879	0.164898	0.790561	CA-CN
Mrps15	324.021	0.17578	0.132658	1.32506	0.185151	0.815	CA-CN
Pgrmc1	290.339	0.175689	0.130257	1.34879	0.177403	0.805329	CA-CN
Mpp5	132.931	0.175656	0.148969	1.17914	0.238343	0.850315	CA-CN
Syne2	498.497	0.175472	0.147181	1.19222	0.233177	0.847509	CA-CN
Adrm1	45.7301	0.175345	0.153425	1.14287	0.253092	0.859314	CA-CN
Zbed3	75.7811	0.175313	0.156026	1.12361	0.261178	0.867602	CA-CN
Lmf2	687.324	0.175261	0.140272	1.24943	0.211506	0.831399	CA-CN
Zfp830	211.15	0.175047	0.1388	1.26114	0.207257	0.828034	CA-CN
Tnrc6b	1310.46	0.175016	0.11815	1.48131	0.138525	0.755642	CA-CN
Atg9a	815.097	0.174982	0.117569	1.48833	0.136663	0.752836	CA-CN
Yif1b	271.341	0.174936	0.134657	1.29912	0.193901	0.824664	CA-CN
Sac3d1	66.5752	0.174932	0.155864	1.12233	0.26172	0.867602	CA-CN
Rabepk	85.5934	0.17491	0.153616	1.13862	0.254862	0.861439	CA-CN
Nf2	624.776	0.174819	0.118237	1.47854	0.139262	0.75589	CA-CN
Npcd	38.9018	0.174691	0.144334	1.21033	0.226154	0.84381	CA-CN
Vps16	611.562	0.174685	0.107259	1.62863	0.10339	0.693563	CA-CN
Ggt5	35.3361	0.174645	0.147837	1.18134	0.237469	0.850315	CA-CN
Mettl1	42.1711	0.174579	0.152059	1.1481	0.250928	0.858659	CA-CN
Abcc2	58.4712	0.174441	0.156023	1.11804	0.263549	0.869249	CA-CN
Cox10	177.264	0.174433	0.142921	1.22048	0.222282	0.839019	CA-CN
4930404N11Rik	69.9373	0.174246	0.15597	1.11718	0.263916	0.869702	CA-CN
Sfn	11.2384	0.174195	0.116393	1.49661	0.134495	0.749529	CA-CN
Cisd3	39.653	0.174185	0.152652	1.14106	0.253846	0.85966	CA-CN
Mirt2	7.788	0.174139	0.0974396	1.78715	0.073914	0.616207	CA-CN
Phactr4	448.316	0.174107	0.140187	1.24197	0.214249	0.832697	CA-CN
Ccdc126	50.7057	0.174077	0.15522	1.12148	0.262083	0.867957	CA-CN
Mbd3	345.764	0.174043	0.134911	1.29006	0.197031	0.825959	CA-CN
Eif2b2	376.82	0.174012	0.12444	1.39837	0.162003	0.789131	CA-CN
Cep104	136.002	0.173997	0.151582	1.14788	0.251019	0.858659	CA-CN
Pcbd2	84.2414	0.173974	0.156051	1.11485	0.264913	0.870308	CA-CN
Mlh3	200.757	0.173919	0.138145	1.25896	0.208046	0.828376	CA-CN
Mapkbp1	159.748	0.173807	0.144456	1.20318	0.228905	0.845222	CA-CN
Zfand2a	204.322	0.173325	0.145324	1.19268	0.232994	0.84727	CA-CN
9230116N13Rik	18.5656	0.173295	0.127259	1.36175	0.173278	0.802096	CA-CN
4933404O12Rik	63.0377	0.173274	0.153126	1.13158	0.257813	0.865232	CA-CN
Rbm44	56.5686	0.173126	0.143499	1.20646	0.227638	0.84466	CA-CN
Prps1	237.127	0.173016	0.138875	1.24584	0.212823	0.832697	CA-CN
Usp35	43.5225	0.172932	0.153972	1.12314	0.26138	0.867602	CA-CN
Cep295	811.184	0.172872	0.126812	1.36321	0.172815	0.802096	CA-CN
Fzd1	34.6719	0.172817	0.13881	1.24499	0.213136	0.832697	CA-CN
B230208H11Rik	45.3216	0.172792	0.148593	1.16285	0.24489	0.853298	CA-CN
Mira	4.08458	0.172745	0.0780329	2.21374	0.0268466	0.405257	CA-CN
Sipa1l3	603.659	0.172743	0.150747	1.14591	0.251831	0.858766	CA-CN
Srrd	160.029	0.17274	0.141482	1.22093	0.222112	0.839019	CA-CN
Lrmda	42.8941	0.172709	0.151215	1.14214	0.253398	0.859556	CA-CN
Mettl15	29.1082	0.17268	0.143229	1.20562	0.227966	0.844735	CA-CN
Ndufb7	277.286	0.172623	0.129094	1.33718	0.181163	0.809489	CA-CN
Arg2	14.1059	0.172598	0.114074	1.51304	0.13027	0.744421	CA-CN
Pdcd5	30.3975	0.172511	0.149717	1.15225	0.249218	0.857533	CA-CN
Ctps	163.027	0.172502	0.146885	1.1744	0.240234	0.850315	CA-CN
Snrpa	241.52	0.172453	0.147905	1.16598	0.243624	0.853024	CA-CN
Hps1	393.181	0.17238	0.131415	1.31172	0.189614	0.821563	CA-CN
Mtus2	36.0797	0.172281	0.125025	1.37797	0.168212	0.794956	CA-CN
Rnf41	459.897	0.172255	0.122162	1.41005	0.158524	0.782247	CA-CN
Srm	119.061	0.17201	0.154249	1.11515	0.264786	0.870308	CA-CN
Relb	182.947	0.17189	0.151224	1.13666	0.255682	0.862996	CA-CN
A830035O19Rik	90.4856	0.1718	0.154347	1.11308	0.265676	0.87037	CA-CN
Crtc3	388.749	0.171763	0.15443	1.11224	0.266036	0.870375	CA-CN
Mrps18b	76.2602	0.1717	0.155263	1.10587	0.268785	0.87342	CA-CN
Ptges2	124.472	0.171334	0.148376	1.15473	0.248202	0.856071	CA-CN
Zfp61	51.0512	0.171316	0.155448	1.10208	0.270428	0.875097	CA-CN
Runx3	299.555	0.1712	0.148146	1.15562	0.247837	0.856071	CA-CN
Apba3	219.658	0.1712	0.139746	1.22507	0.220547	0.839019	CA-CN
Rnf19a	262.385	0.171073	0.13305	1.28578	0.198519	0.826016	CA-CN
Elovl6	389.964	0.17107	0.137656	1.24274	0.213964	0.832697	CA-CN
Khdc3	36.2058	0.171028	0.150288	1.138	0.255122	0.861808	CA-CN
Zfp623	107.79	0.171018	0.153776	1.11213	0.266084	0.870375	CA-CN
Pfkfb1	22.4754	0.170566	0.140971	1.20994	0.226303	0.84381	CA-CN
Pgp	247.647	0.17056	0.140088	1.21752	0.223406	0.840202	CA-CN
Nom1	285.98	0.170453	0.13596	1.2537	0.20995	0.830606	CA-CN
Zfp553	76.8169	0.170453	0.155143	1.09868	0.271906	0.87596	CA-CN
Arsi	48.9476	0.170452	0.153404	1.11114	0.26651	0.870713	CA-CN
Pop7	109.169	0.170262	0.150933	1.12806	0.259295	0.866589	CA-CN
D830050J10Rik	93.9418	0.170174	0.154436	1.1019	0.270504	0.875097	CA-CN
Abl1	1091.24	0.170168	0.125715	1.3536	0.175864	0.805019	CA-CN
Nucb2	253.102	0.170162	0.130623	1.3027	0.192678	0.822779	CA-CN
Wdhd1	633.715	0.170136	0.125403	1.35671	0.174874	0.80328	CA-CN
Zdhhc6	352.672	0.170126	0.122365	1.39032	0.164432	0.790561	CA-CN
Cbfa2t3	1409.63	0.170121	0.137555	1.23675	0.216181	0.835117	CA-CN
Twsg1	134.082	0.170046	0.155126	1.09618	0.273001	0.87644	CA-CN
Ppp1r10	399.159	0.169997	0.131125	1.29645	0.19482	0.825725	CA-CN
Dnmt3b	46.5377	0.169973	0.149005	1.14072	0.253989	0.859776	CA-CN
Nrde2	249.137	0.169953	0.137865	1.23275	0.21767	0.836162	CA-CN
Mrpl52	177.998	0.169811	0.144104	1.17839	0.238641	0.850315	CA-CN
Wdr46	201.54	0.16977	0.148225	1.14535	0.252063	0.858766	CA-CN
Enkd1	88.4832	0.169746	0.154434	1.09915	0.271702	0.87596	CA-CN
Rlf	571.325	0.169718	0.116321	1.45906	0.144549	0.762726	CA-CN
Cnot10	423.643	0.16968	0.121802	1.39309	0.163593	0.79008	CA-CN
Vsig10l	42.175	0.169574	0.149575	1.13371	0.256916	0.86374	CA-CN
Tchp	64.4954	0.16946	0.156049	1.08594	0.277505	0.877876	CA-CN
Noc4l	253.174	0.169394	0.136726	1.23893	0.215372	0.833276	CA-CN
Dtd2	73.1777	0.169328	0.155063	1.09199	0.274836	0.876731	CA-CN
A730008H23Rik	1189.65	0.169272	0.100785	1.67954	0.0930474	0.670045	CA-CN
Rnaset2b	49.2612	0.169162	0.153933	1.09893	0.271797	0.87596	CA-CN
9330133O14Rik	201.758	0.169074	0.141907	1.19144	0.23348	0.847621	CA-CN
Slc10a7	300.723	0.168996	0.133952	1.26162	0.207086	0.828034	CA-CN
Ube2i	93.6985	0.168949	0.153128	1.10332	0.269887	0.874351	CA-CN
Acot1	13.1719	0.168907	0.112146	1.50613	0.132033	0.746654	CA-CN
Fam98c	272.541	0.168826	0.129358	1.30511	0.191857	0.82253	CA-CN
Mrm2	42.5756	0.16867	0.15129	1.11488	0.264903	0.870308	CA-CN
Tmem245	267.73	0.168525	0.138069	1.22059	0.222242	0.839019	CA-CN
Cdr2	27.6585	0.168524	0.14179	1.18855	0.234617	0.848265	CA-CN
Rps6kb1	716.541	0.168511	0.12224	1.37853	0.168041	0.794956	CA-CN
Ncaph2	786.27	0.168471	0.110315	1.52718	0.126717	0.744421	CA-CN
B4galt3	332.112	0.168437	0.129302	1.30266	0.192689	0.822779	CA-CN
Mmgt1	553.187	0.168377	0.124678	1.3505	0.176856	0.805269	CA-CN
Tst	15.6046	0.168178	0.122886	1.36857	0.171134	0.799874	CA-CN
Cherp	819.915	0.168117	0.127766	1.31583	0.188232	0.819342	CA-CN
Zfp622	262.609	0.167959	0.13301	1.26275	0.206677	0.828034	CA-CN
Srf	731.03	0.167833	0.122678	1.36808	0.171287	0.799874	CA-CN
Ebna1bp2	304.66	0.167827	0.133392	1.25815	0.208338	0.829027	CA-CN
Kctd9	311.883	0.167668	0.128548	1.30432	0.192125	0.822779	CA-CN
Arl5b	144.401	0.167664	0.152975	1.09602	0.27307	0.87644	CA-CN
Hmg20b	315.55	0.167566	0.129778	1.29118	0.196642	0.825959	CA-CN
Plekhm2	412.053	0.167565	0.12858	1.3032	0.192507	0.822779	CA-CN
F830208F22Rik	144.693	0.167534	0.144198	1.16183	0.245304	0.853667	CA-CN
Atrip	158.488	0.167534	0.146294	1.14519	0.25213	0.858766	CA-CN
Ppp2cb	737.497	0.167366	0.110189	1.51889	0.128789	0.744421	CA-CN
Prpf31	427.564	0.167336	0.123704	1.35272	0.176147	0.805019	CA-CN
BC031181	222.328	0.167267	0.147819	1.13156	0.257818	0.865232	CA-CN
E430018J23Rik	18.9381	0.167193	0.126487	1.32182	0.186228	0.815956	CA-CN
Mms22l	333.3	0.167181	0.127677	1.30941	0.190395	0.822178	CA-CN
Pigk	536.884	0.16715	0.113211	1.47645	0.139823	0.75589	CA-CN
Rassf7	37.3892	0.167082	0.14319	1.16685	0.24327	0.853024	CA-CN
Gle1	379.906	0.167078	0.121786	1.3719	0.170095	0.79912	CA-CN
Tpra1	366.013	0.167048	0.124481	1.34196	0.179611	0.807122	CA-CN
9330151L19Rik	125.79	0.167025	0.154733	1.07944	0.280392	0.879872	CA-CN
2810004N23Rik	103.648	0.167017	0.15343	1.08855	0.276353	0.877876	CA-CN
Rexo4	302.93	0.167002	0.132069	1.26451	0.206049	0.828034	CA-CN
Gprasp1	130.795	0.166995	0.150667	1.10837	0.267702	0.871856	CA-CN
Gm11715	38.9438	0.166981	0.148292	1.12603	0.260155	0.867602	CA-CN
BC055324	303.625	0.166974	0.128986	1.29451	0.19549	0.825725	CA-CN
Timm10	60.0975	0.166877	0.156052	1.06937	0.284903	0.882052	CA-CN
2810025M15Rik	43.4791	0.166864	0.151719	1.09982	0.271409	0.87596	CA-CN
Dpp9	933.79	0.166726	0.137166	1.21551	0.224173	0.840313	CA-CN
Moap1	121.45	0.166668	0.150971	1.10397	0.269605	0.873688	CA-CN
S1pr3	35.3487	0.166636	0.147344	1.13093	0.258085	0.865833	CA-CN
Dbf4	664.145	0.166508	0.112401	1.48138	0.138505	0.755642	CA-CN
Gstm4	122.025	0.166244	0.152132	1.09276	0.274499	0.876731	CA-CN
Cfap126	13.5509	0.166026	0.108929	1.52416	0.127468	0.744421	CA-CN
Slamf6	58.2909	0.166023	0.156022	1.0641	0.287283	0.882052	CA-CN
Mbd5	197.37	0.165989	0.141007	1.17717	0.239128	0.850315	CA-CN
Zfp512	275.068	0.165874	0.134516	1.23311	0.217533	0.836162	CA-CN
Arl15	236.898	0.165777	0.134184	1.23545	0.216665	0.835137	CA-CN
Kif16b	295.149	0.165663	0.144836	1.14379	0.252709	0.858922	CA-CN
Snx25	231.647	0.16558	0.137566	1.20364	0.228729	0.845222	CA-CN
Fbxw9	41.0379	0.165473	0.152982	1.08165	0.279408	0.879155	CA-CN
Eogt	91.2474	0.16543	0.153784	1.07573	0.282047	0.881569	CA-CN
Mcm10	498.103	0.165342	0.137347	1.20383	0.228657	0.845222	CA-CN
Ttyh3	1463.64	0.165308	0.142565	1.15953	0.246242	0.853995	CA-CN
Alad	70.4555	0.165228	0.154575	1.06892	0.285108	0.882052	CA-CN
Ccdc71	293.874	0.165176	0.137137	1.20446	0.228411	0.845222	CA-CN
Gstcd	172.332	0.165058	0.148369	1.11248	0.265932	0.870375	CA-CN
Bap1	532.659	0.164858	0.133403	1.23579	0.216536	0.835137	CA-CN
Brd9	540.417	0.164857	0.120433	1.36887	0.17104	0.799874	CA-CN
Eipr1	244.735	0.16485	0.137406	1.19973	0.230245	0.845222	CA-CN
Hras	214.956	0.164724	0.140495	1.17245	0.241016	0.850472	CA-CN
Napg	544.262	0.164719	0.120916	1.36226	0.173116	0.802096	CA-CN
Tomm40l	229.89	0.164678	0.140126	1.17521	0.23991	0.850315	CA-CN
Creld2	174.191	0.164588	0.142017	1.15894	0.246482	0.854305	CA-CN
Rbm14	583.569	0.164558	0.140585	1.17053	0.241789	0.850812	CA-CN
Trim11	495.545	0.164287	0.127215	1.29141	0.196562	0.825959	CA-CN
Crtap	62.1245	0.164263	0.156048	1.05264	0.292505	0.882052	CA-CN
Nkrf	71.1591	0.164255	0.15509	1.05909	0.289557	0.882052	CA-CN
E2f6	323.43	0.164247	0.127188	1.29137	0.196576	0.825959	CA-CN
Mdm1	271.589	0.164094	0.136958	1.19813	0.230867	0.845516	CA-CN
Paf1	314.698	0.16408	0.126507	1.29701	0.194627	0.825579	CA-CN
Rtn4ip1	162.516	0.164051	0.141892	1.15617	0.247613	0.855863	CA-CN
Fkbp5	456.713	0.164008	0.134402	1.22028	0.222358	0.839019	CA-CN
Ncapd2	1816.74	0.16397	0.131183	1.24993	0.211324	0.83126	CA-CN
Agbl3	8.67744	0.163947	0.0902425	1.81674	0.0692564	0.60446	CA-CN
Pitrm1	323.95	0.163905	0.137335	1.19347	0.232684	0.846688	CA-CN
Dusp19	35.9968	0.163841	0.144775	1.13169	0.257763	0.865232	CA-CN
Itprip	799.182	0.163801	0.128979	1.26998	0.204091	0.828034	CA-CN
Vasn	183.383	0.163719	0.154169	1.06195	0.288258	0.882052	CA-CN
Pak1ip1	445.049	0.163593	0.129958	1.25882	0.208095	0.828376	CA-CN
Minpp1	295.844	0.163547	0.138023	1.18493	0.236046	0.850287	CA-CN
Pole3	53.8149	0.163545	0.155661	1.05065	0.293419	0.882052	CA-CN
Higd1a	45.6023	0.163536	0.155211	1.05364	0.292049	0.882052	CA-CN
Cfap36	121.521	0.163535	0.151986	1.07599	0.281933	0.881569	CA-CN
Park7	336.945	0.163522	0.127133	1.28623	0.198364	0.826016	CA-CN
Igsf8	498.265	0.163427	0.1274	1.28279	0.199567	0.826162	CA-CN
Pycr2	273.77	0.163346	0.136193	1.19937	0.230384	0.845222	CA-CN
Thoc6	304.457	0.163293	0.130279	1.25341	0.210056	0.830606	CA-CN
Xpa	99.2801	0.163212	0.153239	1.06508	0.286839	0.882052	CA-CN
9330175E14Rik	27.9508	0.163191	0.141045	1.15702	0.247266	0.855711	CA-CN
Supv3l1	191.434	0.163092	0.142473	1.14472	0.252324	0.858766	CA-CN
Prrg2	90.6903	0.163033	0.154169	1.0575	0.290286	0.882052	CA-CN
Mtrf1l	110.205	0.162806	0.149507	1.08895	0.276176	0.877876	CA-CN
Rbms2	143.092	0.162611	0.147168	1.10493	0.269189	0.873688	CA-CN
Pnkp	745.439	0.162593	0.105407	1.54252	0.122947	0.738027	CA-CN
Ccdc174	123.239	0.162553	0.152966	1.06267	0.28793	0.882052	CA-CN
Pgs1	677.667	0.162499	0.125264	1.29726	0.194543	0.825529	CA-CN
Prkaca	396.482	0.162455	0.144778	1.12209	0.261822	0.867602	CA-CN
Aff4	883.904	0.162238	0.102936	1.5761	0.115002	0.715864	CA-CN
Dnajc17	40.8826	0.162156	0.151904	1.06749	0.285751	0.882052	CA-CN
Psmd3	749.82	0.16214	0.128488	1.26191	0.206981	0.828034	CA-CN
Spata2	370.147	0.162135	0.127914	1.26753	0.204965	0.828034	CA-CN
Ap3s1	181.464	0.162116	0.148206	1.09386	0.274018	0.87644	CA-CN
Sp3os	88.0896	0.161999	0.155375	1.04263	0.297118	0.882694	CA-CN
Raet1c	10.8358	0.161904	0.111962	1.44606	0.148161	0.771049	CA-CN
Zfp446	30.9507	0.161759	0.150477	1.07498	0.282386	0.881569	CA-CN
Ptgdr2	11.943	0.161699	0.0980677	1.64885	0.0991782	0.680827	CA-CN
Dtx2	380.428	0.161663	0.130439	1.23937	0.215207	0.833218	CA-CN
Mfsd12	417.51	0.161478	0.138451	1.16632	0.243484	0.853024	CA-CN
Dhrs1	548.425	0.161473	0.125325	1.28843	0.197596	0.825959	CA-CN
Pdxp	46.8321	0.161417	0.153485	1.05168	0.292944	0.882052	CA-CN
2510039O18Rik	842.783	0.161417	0.114239	1.41297	0.157664	0.779228	CA-CN
Bcr	565.251	0.161372	0.143427	1.12512	0.260539	0.867602	CA-CN
Syne3	723.843	0.161329	0.130082	1.24021	0.214898	0.832697	CA-CN
Cbfa2t2	216.602	0.161263	0.144446	1.11643	0.264239	0.870259	CA-CN
Prune1	238.258	0.161215	0.13411	1.20211	0.229319	0.845222	CA-CN
Thoc3	257.804	0.161154	0.133277	1.20917	0.226597	0.84381	CA-CN
Tbc1d9	592.161	0.161135	0.115678	1.39296	0.163631	0.79008	CA-CN
Ccdc58	47.8965	0.161095	0.155402	1.03663	0.299907	0.885331	CA-CN
Enoph1	273.728	0.161024	0.129479	1.24364	0.213634	0.832697	CA-CN
Alg5	227.958	0.160904	0.142151	1.13192	0.257668	0.865232	CA-CN
Toe1	255.303	0.160866	0.129416	1.24302	0.213862	0.832697	CA-CN
Cd163	116.049	0.160728	0.151894	1.05816	0.289982	0.882052	CA-CN
Anln	1347.29	0.160719	0.102975	1.56076	0.11858	0.725703	CA-CN
Dennd4c	471.038	0.160712	0.128859	1.24719	0.212327	0.832315	CA-CN
Abhd2	374.573	0.160693	0.140016	1.14767	0.251103	0.858659	CA-CN
Mark4	265.318	0.160666	0.149308	1.07607	0.281896	0.881569	CA-CN
Ssc4d	62.5875	0.160495	0.156053	1.02847	0.303731	0.887654	CA-CN
Casp8ap2	735.868	0.160452	0.123205	1.30231	0.19281	0.822779	CA-CN
Tacc3	669.521	0.160195	0.115395	1.38824	0.165065	0.790561	CA-CN
Ddx11	139.763	0.160178	0.148715	1.07708	0.281445	0.881569	CA-CN
Gm19582	34.1682	0.160168	0.14546	1.10112	0.270846	0.875611	CA-CN
Fbxo25	110.368	0.160149	0.152334	1.0513	0.293119	0.882052	CA-CN
Ska1	163.409	0.160059	0.144374	1.10864	0.267584	0.871856	CA-CN
Coq7	45.9598	0.160059	0.154022	1.0392	0.298713	0.884877	CA-CN
Ipp	119.216	0.16004	0.15137	1.05727	0.290388	0.882052	CA-CN
Alg14	118.508	0.159989	0.148669	1.07614	0.281863	0.881569	CA-CN
Cep55	551.765	0.159838	0.118662	1.34701	0.177978	0.805329	CA-CN
Pagr1a	313.048	0.159821	0.139592	1.14492	0.252244	0.858766	CA-CN
Chchd6	25.4381	0.159774	0.139911	1.14197	0.253468	0.859556	CA-CN
Pigg	130.833	0.159726	0.146937	1.08704	0.277021	0.877876	CA-CN
Utp15	304.837	0.159708	0.13076	1.22139	0.22194	0.839019	CA-CN
Zfas1	136.644	0.159682	0.152598	1.04642	0.295365	0.882351	CA-CN
Ckap5	1701.33	0.159622	0.103702	1.53923	0.123748	0.738172	CA-CN
Kat6b	189.881	0.159616	0.142683	1.11867	0.263279	0.869249	CA-CN
Impdh2	46.0934	0.159593	0.154281	1.03443	0.300936	0.885331	CA-CN
Haus6	423.194	0.159503	0.131987	1.20848	0.226865	0.84425	CA-CN
Akr1c18	14.5821	0.159497	0.12088	1.31946	0.187014	0.81687	CA-CN
Exosc4	132.878	0.159484	0.14719	1.08352	0.278576	0.878844	CA-CN
Xpnpep1	535.775	0.159426	0.135091	1.18014	0.237943	0.850315	CA-CN
Eif2b3	90.3515	0.159387	0.155378	1.0258	0.304986	0.888774	CA-CN
Sdad1	900.065	0.159381	0.106464	1.49704	0.134382	0.749529	CA-CN
2310009A05Rik	95.5907	0.159362	0.155133	1.02726	0.304298	0.887657	CA-CN
Itfg2	97.9842	0.159313	0.154322	1.03234	0.301913	0.885331	CA-CN
Def8	607.957	0.159305	0.123227	1.29277	0.196089	0.825959	CA-CN
Arl6	13.8717	0.15928	0.1082	1.4721	0.140994	0.757166	CA-CN
Abraxas1	114.507	0.159255	0.152253	1.04598	0.295568	0.882576	CA-CN
Gm28042	88.2505	0.159194	0.154436	1.03081	0.302631	0.885331	CA-CN
Nudt22	117.779	0.159089	0.153535	1.03617	0.300122	0.885331	CA-CN
Cmc4	51.113	0.15903	0.155881	1.02021	0.307631	0.890212	CA-CN
Ddx23	699.639	0.158918	0.116128	1.36847	0.171164	0.799874	CA-CN
Vegfb	46.8711	0.158848	0.155064	1.0244	0.305645	0.889571	CA-CN
Pcgf3	367.348	0.158834	0.132931	1.19486	0.232142	0.846075	CA-CN
Intu	35.3361	0.158834	0.147577	1.07628	0.281804	0.881569	CA-CN
Ranbp1	390.906	0.158809	0.132244	1.20088	0.229797	0.845222	CA-CN
Nanos1	46.0206	0.158782	0.151349	1.04911	0.294128	0.882052	CA-CN
Rubcnl	300.909	0.158764	0.12994	1.22183	0.221772	0.839019	CA-CN
Kctd3	163.861	0.158678	0.150611	1.05356	0.292083	0.882052	CA-CN
Wdr34	17.3769	0.158677	0.105242	1.50774	0.131622	0.746654	CA-CN
Lrfn1	16.8155	0.15864	0.130313	1.21738	0.223458	0.840202	CA-CN
Vps18	434.029	0.15844	0.12843	1.23367	0.217325	0.836162	CA-CN
Cbarp	41.9857	0.158414	0.148506	1.06672	0.286098	0.882052	CA-CN
2310022B05Rik	162.376	0.158401	0.153043	1.03501	0.300664	0.885331	CA-CN
Anxa11	405.165	0.158302	0.131735	1.20167	0.229491	0.845222	CA-CN
Ttc16	25.7475	0.158267	0.137772	1.14876	0.250656	0.858659	CA-CN
Spsb2	133.401	0.158151	0.148864	1.06239	0.28806	0.882052	CA-CN
Mrpl55	115.061	0.158094	0.153336	1.03103	0.302527	0.885331	CA-CN
Ripk2	320.41	0.158045	0.129226	1.22302	0.221323	0.839019	CA-CN
Zdhhc18	311.729	0.15795	0.144384	1.09395	0.273976	0.87644	CA-CN
St7	85.3487	0.157936	0.1553	1.01698	0.309164	0.891749	CA-CN
Msto1	133.014	0.157925	0.153092	1.03157	0.302273	0.885331	CA-CN
Mis18bp1	697.51	0.157661	0.123548	1.27611	0.201918	0.828034	CA-CN
Trim3	284.213	0.157647	0.130938	1.20399	0.228594	0.845222	CA-CN
Ak6	180.448	0.157634	0.15562	1.01294	0.311088	0.894589	CA-CN
Ttbk2	195.796	0.157579	0.136369	1.15554	0.24787	0.856071	CA-CN
Gpatch2	168.429	0.157395	0.144198	1.09152	0.275045	0.876731	CA-CN
Spred1	418.778	0.157364	0.125177	1.25713	0.208707	0.829328	CA-CN
Fancc	135.655	0.157326	0.152259	1.03328	0.301474	0.885331	CA-CN
Cep120	475.16	0.15732	0.1371	1.14748	0.251183	0.858659	CA-CN
LOC108167416	11.1266	0.157006	0.113679	1.38113	0.167239	0.793643	CA-CN
Ddx49	388.266	0.156999	0.128633	1.22051	0.222271	0.839019	CA-CN
Sipa1l1	199.036	0.156995	0.149147	1.05262	0.292517	0.882052	CA-CN
Gipc1	328.027	0.15692	0.133131	1.17869	0.238522	0.850315	CA-CN
Hpn	20.1036	0.156848	0.136551	1.14864	0.250705	0.858659	CA-CN
Tmed8	399.256	0.156793	0.119875	1.30797	0.190885	0.822455	CA-CN
Ric1	345.108	0.156758	0.134406	1.1663	0.243494	0.853024	CA-CN
Prg4	51.0598	0.156754	0.155245	1.00972	0.312632	0.895538	CA-CN
Atpif1	261.638	0.156737	0.142436	1.1004	0.271156	0.875952	CA-CN
Rfxank	343.142	0.156713	0.129897	1.20644	0.227647	0.84466	CA-CN
Parvg	964.665	0.156695	0.104123	1.50491	0.132348	0.746758	CA-CN
Igf1r	307.456	0.156636	0.142689	1.09774	0.272316	0.876254	CA-CN
Ndufaf7	339.35	0.15658	0.126871	1.23417	0.21714	0.836114	CA-CN
Camkk1	18.889	0.156448	0.130277	1.20089	0.229796	0.845222	CA-CN
Zfp523	55.6531	0.156308	0.15217	1.02719	0.30433	0.887657	CA-CN
Ppp1r13l	15.2908	0.156305	0.116283	1.34418	0.178891	0.807122	CA-CN
Ncapg	1024.67	0.156153	0.11799	1.32345	0.185687	0.81548	CA-CN
Pip5k1c	1177.15	0.156066	0.120438	1.29582	0.195037	0.825725	CA-CN
Nhej1	49.8629	0.155863	0.155078	1.00506	0.314866	0.897816	CA-CN
Rbmx2	50.1419	0.155815	0.155555	1.00167	0.316502	0.898759	CA-CN
Ddah2	21.3351	0.155787	0.134264	1.1603	0.245925	0.853667	CA-CN
Melk	514.17	0.155721	0.11717	1.32902	0.183841	0.812941	CA-CN
Usp14	600.041	0.155708	0.115175	1.35192	0.176401	0.805019	CA-CN
Mrps12	159.974	0.15569	0.1472	1.05767	0.290205	0.882052	CA-CN
Decr1	169.621	0.155684	0.145243	1.07189	0.28377	0.882052	CA-CN
Chdh	61.8732	0.155654	0.150636	1.03331	0.301458	0.885331	CA-CN
Xk	38.0203	0.155628	0.149166	1.04332	0.2968	0.882576	CA-CN
Il1rl2	105.947	0.155431	0.155039	1.00253	0.316089	0.898578	CA-CN
Slc2a9	131.027	0.155379	0.146635	1.05963	0.289313	0.882052	CA-CN
Tnfrsf12a	32.4105	0.155378	0.146153	1.06312	0.287728	0.882052	CA-CN
9130019O22Rik	33.6574	0.155311	0.150478	1.03212	0.302016	0.885331	CA-CN
Dnajb14	378.272	0.15523	0.120511	1.2881	0.19771	0.825959	CA-CN
Gtf2f2	232.007	0.155223	0.138	1.1248	0.260673	0.867602	CA-CN
A430057M04Rik	36.775	0.155198	0.149	1.0416	0.297598	0.883153	CA-CN
Gemin4	53.22	0.155133	0.155622	0.996858	0.318833	0.89945	CA-CN
Luzp1	191.387	0.155115	0.143675	1.07962	0.28031	0.879872	CA-CN
Ndc80	395.51	0.154971	0.12948	1.19687	0.231358	0.846016	CA-CN
H2-T-ps	54.4067	0.154893	0.155827	0.994008	0.320219	0.899804	CA-CN
Dnah8	440.768	0.154851	0.126334	1.22573	0.220299	0.839019	CA-CN
Dctn6	229.672	0.15485	0.137161	1.12897	0.258913	0.866078	CA-CN
Srbd1	278.994	0.154845	0.130052	1.19064	0.233793	0.847797	CA-CN
D8Ertd738e	467.183	0.154798	0.124391	1.24445	0.213335	0.832697	CA-CN
Zbtb11os1	89.1333	0.154744	0.155303	0.996404	0.319054	0.89945	CA-CN
Ubxn2b	236.281	0.154723	0.135279	1.14374	0.252733	0.858922	CA-CN
Clpx	253.294	0.154715	0.130876	1.18216	0.237144	0.850315	CA-CN
Polr2i	117.461	0.154667	0.15136	1.02185	0.306851	0.890193	CA-CN
Cnnm4	439.008	0.15461	0.131704	1.17392	0.240427	0.850315	CA-CN
Dcaf10	407	0.154568	0.12312	1.25543	0.209322	0.829813	CA-CN
Dmap1	101.664	0.154534	0.154636	0.999334	0.317633	0.89945	CA-CN
Ylpm1	508.388	0.154402	0.127223	1.21363	0.22489	0.841887	CA-CN
Slc18a2	47.5591	0.154288	0.1473	1.04744	0.294898	0.882067	CA-CN
Aen	140.32	0.154221	0.150053	1.02778	0.304055	0.887657	CA-CN
Dennd2d	263.473	0.154213	0.133494	1.1552	0.248007	0.856071	CA-CN
Afdn	272.131	0.154079	0.133166	1.15705	0.247253	0.855711	CA-CN
A230020J21Rik	130.074	0.154078	0.14795	1.04142	0.297681	0.883153	CA-CN
Lrrfip2	608.691	0.154007	0.11459	1.34398	0.178955	0.807122	CA-CN
Sesn2	126.416	0.153998	0.155299	0.991622	0.321382	0.899806	CA-CN
Usp5	827.83	0.153971	0.113854	1.35235	0.176263	0.805019	CA-CN
Baiap2	138.805	0.153963	0.15598	0.987068	0.32361	0.900489	CA-CN
Klhl21	233.861	0.153918	0.149081	1.03245	0.301863	0.885331	CA-CN
Paox	28.4497	0.153902	0.144236	1.06701	0.285965	0.882052	CA-CN
Ccar2	458.776	0.153849	0.115903	1.32739	0.184378	0.814157	CA-CN
Sgta	477.85	0.153797	0.13083	1.17555	0.239774	0.850315	CA-CN
Lrpap1	874.134	0.153559	0.107575	1.42746	0.153446	0.773702	CA-CN
Fam3c	189.526	0.153464	0.139167	1.10273	0.270143	0.87493	CA-CN
Zfp637	78.1496	0.153439	0.155231	0.988454	0.32293	0.900489	CA-CN
Stk11	866.554	0.153431	0.118444	1.29539	0.195185	0.825725	CA-CN
Ccdc102a	79	0.153379	0.155962	0.983434	0.325394	0.900685	CA-CN
Gm36738	19.5646	0.153367	0.125675	1.22034	0.222334	0.839019	CA-CN
Wdr81	686.439	0.153351	0.11779	1.3019	0.192949	0.822779	CA-CN
Mfsd6	753.78	0.153342	0.117622	1.30368	0.192342	0.822779	CA-CN
Tax1bp3	14.2264	0.153224	0.126919	1.20726	0.227331	0.84466	CA-CN
Psen2	259.528	0.153223	0.137439	1.11484	0.264917	0.870308	CA-CN
Nacc1	681.376	0.153204	0.140845	1.08775	0.276706	0.877876	CA-CN
Bod1l	1241.29	0.153172	0.101971	1.50211	0.133068	0.747841	CA-CN
Cflar	949.606	0.153123	0.110185	1.3897	0.164621	0.790561	CA-CN
Ski	836.565	0.153076	0.13602	1.12539	0.260424	0.867602	CA-CN
Gemin8	11.7041	0.153069	0.115919	1.32048	0.186675	0.816333	CA-CN
Wdpcp	22.0945	0.153024	0.13882	1.10232	0.270322	0.875007	CA-CN
Nek6	35.2073	0.152999	0.13797	1.10892	0.267463	0.871856	CA-CN
Pim2	34.8695	0.15298	0.145828	1.04905	0.294157	0.882052	CA-CN
Prpf6	445.866	0.152906	0.126365	1.21003	0.226266	0.84381	CA-CN
Slc36a4	497.463	0.152784	0.119647	1.27695	0.201618	0.828034	CA-CN
Hint2	61.1342	0.152555	0.154818	0.985386	0.324434	0.900685	CA-CN
Upf1	1159.72	0.15249	0.110275	1.38282	0.166721	0.793426	CA-CN
Amdhd2	320.525	0.152317	0.133101	1.14437	0.252471	0.858922	CA-CN
Paqr3	256.742	0.152299	0.145493	1.04678	0.295201	0.882351	CA-CN
Rcc1l	69.0549	0.152127	0.155511	0.978239	0.327956	0.901935	CA-CN
Ppfibp1	108.476	0.152106	0.154848	0.982293	0.325956	0.900938	CA-CN
Qdpr	216.551	0.152094	0.139362	1.09136	0.275117	0.876731	CA-CN
Csrp2	196.572	0.152084	0.137222	1.10831	0.26773	0.871856	CA-CN
Gm16740	46.388	0.151999	0.15489	0.981335	0.326428	0.901006	CA-CN
Dxo	209.62	0.151827	0.141311	1.07442	0.282635	0.881569	CA-CN
Dnajc16	176.173	0.151825	0.144565	1.05022	0.293617	0.882052	CA-CN
Med15	908.015	0.151707	0.131573	1.15302	0.248902	0.857533	CA-CN
Snf8	202.736	0.151635	0.138729	1.09303	0.274379	0.876731	CA-CN
Mtx1	238.006	0.151614	0.130873	1.15849	0.246666	0.854419	CA-CN
Lrig2	368.471	0.151562	0.128995	1.17494	0.240018	0.850315	CA-CN
Secisbp2	422.483	0.151459	0.117491	1.28911	0.19736	0.825959	CA-CN
Lrrc51	14.1055	0.15145	0.123933	1.22203	0.221695	0.839019	CA-CN
Tubgcp2	435.301	0.151449	0.13178	1.14926	0.250451	0.858659	CA-CN
Scaf4	657.829	0.151342	0.118586	1.27622	0.201878	0.828034	CA-CN
Senp1	935.378	0.151294	0.102838	1.47119	0.141241	0.757277	CA-CN
Hes6	271.736	0.151227	0.130007	1.16322	0.244741	0.853298	CA-CN
Lin54	566.96	0.151199	0.111615	1.35464	0.175532	0.804632	CA-CN
Armc8	384.075	0.151157	0.12859	1.1755	0.239797	0.850315	CA-CN
Fam118a	118.151	0.151157	0.147516	1.02468	0.305515	0.889465	CA-CN
Mipep	151.974	0.1511	0.144775	1.04369	0.29663	0.882576	CA-CN
Wdr5	534.418	0.151043	0.128328	1.17701	0.239193	0.850315	CA-CN
Tex30	127.388	0.151021	0.149794	1.00819	0.313363	0.896605	CA-CN
Tbk1	703.951	0.150993	0.109541	1.37841	0.168077	0.794956	CA-CN
Cdt1	528.977	0.150934	0.144435	1.04499	0.296027	0.882576	CA-CN
Mfsd10	518.7	0.150914	0.144658	1.04325	0.296833	0.882576	CA-CN
Lyplal1	7.71503	0.150851	0.0949643	1.58851	0.112172	0.710924	CA-CN
Nat6	164.293	0.150765	0.146676	1.02788	0.304005	0.887657	CA-CN
Gtse1	320.952	0.150731	0.148053	1.01808	0.308639	0.89095	CA-CN
Myd88	1140.84	0.15065	0.110831	1.35927	0.174061	0.802096	CA-CN
Tmem263	143.381	0.150594	0.145881	1.03231	0.301927	0.885331	CA-CN
Gm16861	68.7816	0.150381	0.15551	0.967015	0.333537	0.904129	CA-CN
C030006K11Rik	50.1519	0.150361	0.152996	0.982782	0.325715	0.900685	CA-CN
Coq10a	214.787	0.150351	0.139929	1.07448	0.282609	0.881569	CA-CN
Samd4b	426.942	0.15035	0.137134	1.09637	0.272918	0.87644	CA-CN
Phf19	172.901	0.150302	0.148843	1.0098	0.312591	0.895538	CA-CN
Rybp	114.463	0.150236	0.152006	0.988355	0.322979	0.900489	CA-CN
Spg7	413.051	0.15022	0.134067	1.12048	0.262509	0.868099	CA-CN
Vps8	338.437	0.150133	0.130316	1.15207	0.249292	0.857533	CA-CN
Nrg4	67.9773	0.150098	0.155907	0.962737	0.335679	0.906014	CA-CN
Smc1a	1612.15	0.150008	0.10156	1.47704	0.139666	0.75589	CA-CN
Hist1h3a	5.75298	0.149983	0.0892096	1.68124	0.0927157	0.669669	CA-CN
Mfsd4b4	10.4853	0.149983	0.11448	1.31012	0.190154	0.822178	CA-CN
Scd2	909.311	0.149928	0.134083	1.11817	0.263493	0.869249	CA-CN
Rmdn3	165.657	0.149815	0.143875	1.04129	0.297741	0.883153	CA-CN
Chchd10	15.825	0.149807	0.124108	1.20707	0.227406	0.84466	CA-CN
Car14	33.0204	0.149782	0.141997	1.05483	0.291505	0.882052	CA-CN
Zfp628	215.159	0.149674	0.15135	0.988927	0.322699	0.900489	CA-CN
Ubr5	1281.08	0.149663	0.114551	1.30651	0.191378	0.822455	CA-CN
Foxj3	297.105	0.149662	0.128975	1.1604	0.245888	0.853667	CA-CN
Bbs12	38.4751	0.149623	0.153298	0.976025	0.329052	0.902279	CA-CN
Trappc6a	154.94	0.149587	0.152411	0.981467	0.326363	0.901006	CA-CN
Diaph3	411.61	0.149581	0.119084	1.2561	0.209081	0.829813	CA-CN
Adal	142.05	0.149525	0.150711	0.99213	0.321134	0.899806	CA-CN
Pin1	190.291	0.149496	0.142513	1.049	0.29418	0.882052	CA-CN
Nelfe	194.729	0.149474	0.141295	1.05789	0.290107	0.882052	CA-CN
Prr14l	836.662	0.149383	0.10977	1.36087	0.173553	0.802096	CA-CN
Arvcf	54.8537	0.149361	0.151999	0.98264	0.325785	0.900685	CA-CN
Zer1	389.107	0.149305	0.130802	1.14145	0.253681	0.85966	CA-CN
Capn10	82.5195	0.149203	0.15575	0.957967	0.338079	0.906786	CA-CN
Cox18	69.7431	0.149171	0.155386	0.960002	0.337054	0.906786	CA-CN
Uqcc3	93.1327	0.149155	0.153689	0.970498	0.331798	0.903836	CA-CN
Fkbp9	30.7374	0.149051	0.147165	1.01281	0.31115	0.894589	CA-CN
Acad11	125.201	0.149007	0.155568	0.957823	0.338152	0.906786	CA-CN
Itpripl1	598.744	0.148957	0.115392	1.29087	0.196747	0.825959	CA-CN
Eya3	701.243	0.148909	0.113935	1.30697	0.191223	0.822455	CA-CN
Zfp688	70.5736	0.148842	0.155656	0.956224	0.338959	0.906786	CA-CN
Limk2	254.688	0.148825	0.13763	1.08134	0.279547	0.879155	CA-CN
Cox6b2	87.9236	0.148673	0.152862	0.972597	0.330754	0.903711	CA-CN
Ccdc171	62.8787	0.148645	0.155609	0.955247	0.339453	0.906976	CA-CN
Map3k4	330.702	0.148562	0.147848	1.00483	0.314978	0.897816	CA-CN
Mrpl16	216.301	0.148559	0.140147	1.06002	0.289137	0.882052	CA-CN
Slc4a1ap	273.425	0.148548	0.132428	1.12172	0.261981	0.867876	CA-CN
Nbas	257.069	0.14848	0.138085	1.07528	0.282251	0.881569	CA-CN
Tkfc	89.6436	0.148349	0.156053	0.950631	0.341792	0.907717	CA-CN
Mcrs1	108.657	0.148349	0.150008	0.988937	0.322694	0.900489	CA-CN
Rprd2	981.131	0.148314	0.107824	1.37552	0.168969	0.79681	CA-CN
Fndc9	9.82905	0.148189	0.111793	1.32556	0.184985	0.81461	CA-CN
Fam8a1	112.36	0.148064	0.155374	0.952953	0.340614	0.907717	CA-CN
Itpa	130.682	0.148064	0.149202	0.992369	0.321017	0.899806	CA-CN
Slc2a8	78.4455	0.148058	0.152101	0.973419	0.330345	0.903358	CA-CN
Tbrg1	136.088	0.148052	0.148292	0.998378	0.318096	0.89945	CA-CN
Gtf2ird1	52.5876	0.14805	0.153422	0.964985	0.334552	0.905452	CA-CN
Zmat3	90.9686	0.14803	0.155846	0.949848	0.342189	0.907793	CA-CN
Rabggta	327.466	0.14791	0.124431	1.18869	0.234561	0.848265	CA-CN
Lekr1	8.54932	0.147859	0.0922259	1.60322	0.108885	0.707129	CA-CN
Ddx21	1003.57	0.147739	0.112487	1.31339	0.189052	0.820903	CA-CN
Anapc7	326.763	0.147686	0.1264	1.1684	0.242644	0.85249	CA-CN
Ankrd23	59.3634	0.147607	0.152666	0.966858	0.333615	0.904129	CA-CN
4930512B01Rik	8.23791	0.147491	0.107386	1.37346	0.169608	0.798157	CA-CN
Ak2	605.607	0.147455	0.120635	1.22231	0.221589	0.839019	CA-CN
Lonp1	277.085	0.147431	0.152921	0.964103	0.334994	0.905627	CA-CN
Apeh	423.13	0.147388	0.131322	1.12234	0.261718	0.867602	CA-CN
Slf1	167.146	0.147383	0.151982	0.969744	0.332174	0.90412	CA-CN
Trim43c	14.0075	0.14729	0.123339	1.19419	0.232404	0.846213	CA-CN
Kptn	121.598	0.147287	0.148436	0.99226	0.321071	0.899806	CA-CN
Cbll1	279.467	0.14728	0.127542	1.15476	0.248189	0.856071	CA-CN
Zfp704	205.584	0.14728	0.137941	1.06771	0.285653	0.882052	CA-CN
D3Ertd254e	131.596	0.147216	0.15123	0.973457	0.330326	0.903358	CA-CN
Nrp2	226.138	0.147212	0.139947	1.05192	0.292838	0.882052	CA-CN
Fstl3	27.7709	0.147157	0.14376	1.02363	0.306011	0.889868	CA-CN
Ccdc61	106.548	0.147104	0.154563	0.951741	0.341228	0.907717	CA-CN
N4bp3	27.5404	0.147096	0.146313	1.00535	0.314729	0.897764	CA-CN
Ssbp4	707.883	0.146872	0.12233	1.20062	0.229899	0.845222	CA-CN
9130401M01Rik	221.077	0.1468	0.138738	1.05811	0.290007	0.882052	CA-CN
A430093F15Rik	18.9811	0.146716	0.138184	1.06174	0.288352	0.882052	CA-CN
A130077B15Rik	58.1024	0.146696	0.155829	0.941391	0.346505	0.910621	CA-CN
Coil	100.191	0.14662	0.154522	0.948864	0.34269	0.908353	CA-CN
Psmc3	806.045	0.146569	0.112651	1.30108	0.193231	0.823361	CA-CN
Lins1	106.491	0.146543	0.151786	0.965459	0.334315	0.905031	CA-CN
Taf15	553.5	0.146426	0.122031	1.19991	0.230173	0.845222	CA-CN
Sfswap	440.021	0.146383	0.123	1.1901	0.234006	0.848075	CA-CN
Med10	198.246	0.14637	0.138504	1.05679	0.290608	0.882052	CA-CN
Hddc3	20.4504	0.146243	0.133615	1.09451	0.273731	0.87644	CA-CN
Nlrx1	503.089	0.146175	0.13547	1.07903	0.280576	0.88	CA-CN
Bach2	52.9346	0.146171	0.155192	0.941873	0.346258	0.910621	CA-CN
Sbds	261.188	0.145967	0.133322	1.09485	0.273582	0.87644	CA-CN
Srebf1	815.733	0.145892	0.133654	1.09157	0.275023	0.876731	CA-CN
Gna11	237.476	0.14584	0.139161	1.04799	0.294641	0.882052	CA-CN
3110062M04Rik	132.184	0.145768	0.149319	0.97622	0.328955	0.902279	CA-CN
Spata1	63.991	0.145746	0.156035	0.934061	0.350273	0.911512	CA-CN
Adamts3	66.7013	0.145746	0.155185	0.939173	0.347642	0.911071	CA-CN
2610020C07Rik	113.156	0.145724	0.151158	0.964048	0.335022	0.905627	CA-CN
Ubr7	483.652	0.145707	0.117426	1.24084	0.214664	0.832697	CA-CN
Vwa8	135.259	0.145541	0.153682	0.947028	0.343625	0.908961	CA-CN
Zmat5	159.363	0.145513	0.149822	0.971241	0.331429	0.903711	CA-CN
Cep83os	131.389	0.145472	0.155137	0.937701	0.348398	0.911071	CA-CN
C1qtnf12	72.8069	0.145435	0.155436	0.935659	0.349449	0.911071	CA-CN
Exosc5	244.815	0.145406	0.140886	1.03208	0.302033	0.885331	CA-CN
Shpk	58.7584	0.145297	0.154399	0.941044	0.346682	0.910621	CA-CN
Gm15545	46.4593	0.145255	0.15516	0.936158	0.349192	0.911071	CA-CN
Tcf7l2	16.5996	0.145234	0.120908	1.20119	0.229677	0.845222	CA-CN
Rnaseh2a	165.523	0.145148	0.146216	0.992697	0.320857	0.899806	CA-CN
5830417I10Rik	126.376	0.145094	0.152685	0.950279	0.341971	0.907717	CA-CN
Prr7	30.6057	0.145046	0.147804	0.981337	0.326427	0.901006	CA-CN
Osbpl3	268.927	0.144966	0.128323	1.1297	0.258601	0.865833	CA-CN
Usb1	463.985	0.14496	0.116784	1.24127	0.214507	0.832697	CA-CN
Bag5	160.197	0.144894	0.14149	1.02406	0.305807	0.889584	CA-CN
Hbs1l	347.635	0.144873	0.12891	1.12383	0.261084	0.867602	CA-CN
Clcn6	190.166	0.144869	0.151644	0.955325	0.339414	0.906976	CA-CN
Gab1	77.1107	0.14482	0.155673	0.930282	0.352225	0.911512	CA-CN
Fam206a	269.133	0.144727	0.145034	0.997879	0.318338	0.89945	CA-CN
Spata7	13.7596	0.144658	0.123281	1.1734	0.240637	0.850315	CA-CN
Exosc8	351.66	0.144597	0.12419	1.16433	0.244292	0.853298	CA-CN
Ect2	689.054	0.144541	0.117061	1.23475	0.216925	0.835571	CA-CN
Vti1a	329.439	0.144509	0.125412	1.15227	0.249211	0.857533	CA-CN
Ercc3	411.973	0.144477	0.126278	1.14412	0.252572	0.858922	CA-CN
Sde2	364.032	0.144377	0.12603	1.14558	0.25197	0.858766	CA-CN
Cbx5	2140.87	0.144345	0.105299	1.37081	0.170436	0.799726	CA-CN
Hmgn1	73.8316	0.144291	0.155267	0.929314	0.352726	0.911512	CA-CN
Ung	87.3794	0.144052	0.150902	0.954605	0.339778	0.907223	CA-CN
Ddit4	56.5988	0.144042	0.146451	0.983551	0.325336	0.900685	CA-CN
Ctdspl	580.191	0.144032	0.130365	1.10484	0.269231	0.873688	CA-CN
Vezt	132.281	0.144006	0.149488	0.963333	0.33538	0.905743	CA-CN
Mthfd1l	520.712	0.144003	0.139742	1.03049	0.30278	0.885331	CA-CN
Kif1bp	237.034	0.143986	0.136866	1.05202	0.292788	0.882052	CA-CN
Arfgef2	481.769	0.143851	0.148998	0.965456	0.334317	0.905031	CA-CN
Otub2	22.9073	0.143812	0.136864	1.05076	0.293367	0.882052	CA-CN
Pold1	535.331	0.143805	0.139541	1.03055	0.30275	0.885331	CA-CN
Ankrd66	16.02	0.143741	0.131603	1.09223	0.274732	0.876731	CA-CN
Fam221a	28.6172	0.143716	0.146219	0.982888	0.325662	0.900685	CA-CN
1700017B05Rik	211.2	0.143409	0.146306	0.980195	0.32699	0.901373	CA-CN
H2-T10	68.2283	0.143344	0.155096	0.924227	0.355368	0.911512	CA-CN
B3gat3	372.622	0.143321	0.133602	1.07275	0.283385	0.882052	CA-CN
Fam219a	122.757	0.143199	0.152912	0.936482	0.349025	0.911071	CA-CN
Kiz	162.872	0.143175	0.148168	0.966301	0.333894	0.904319	CA-CN
Thap3	126.895	0.142949	0.151796	0.941721	0.346336	0.910621	CA-CN
Ctdp1	378.964	0.142913	0.137871	1.03657	0.299936	0.885331	CA-CN
Smpd4	428.365	0.142901	0.120756	1.18338	0.236657	0.850315	CA-CN
Tmx4	737.122	0.142831	0.114026	1.25263	0.210342	0.830865	CA-CN
Cdca4	611.228	0.142602	0.112846	1.26368	0.206344	0.828034	CA-CN
Ccdc166	43.4027	0.142587	0.150997	0.9443	0.345017	0.909642	CA-CN
Ddt	110.035	0.14242	0.15087	0.943993	0.345173	0.909819	CA-CN
Tpmt	44.7306	0.142337	0.155083	0.917809	0.358719	0.911704	CA-CN
Eva1b	10.6216	0.142268	0.102768	1.38436	0.166248	0.792231	CA-CN
Akr7a5	124.047	0.142253	0.152846	0.930696	0.352011	0.911512	CA-CN
Phf12	859.219	0.142191	0.104566	1.35982	0.173888	0.802096	CA-CN
Rab22a	280.015	0.142165	0.128175	1.10914	0.267369	0.871856	CA-CN
Ttc7b	227.066	0.142161	0.148544	0.957029	0.338553	0.906786	CA-CN
Tesk2	491.352	0.142107	0.115974	1.22534	0.220447	0.839019	CA-CN
Frg2f1	12.1752	0.142107	0.112241	1.26609	0.20548	0.828034	CA-CN
Rrn3	430.473	0.142065	0.126739	1.12093	0.262319	0.868099	CA-CN
Bcl7b	301.07	0.142054	0.129299	1.09865	0.271922	0.87596	CA-CN
Msh5	30.7688	0.142035	0.142665	0.995582	0.319453	0.89945	CA-CN
Clec2f	10.9241	0.14196	0.114647	1.23824	0.215627	0.833694	CA-CN
Eif2ak4	214.993	0.141909	0.139951	1.01399	0.310587	0.894291	CA-CN
Chchd3	356.103	0.141897	0.131859	1.07613	0.28187	0.881569	CA-CN
Polr2e	338.199	0.14186	0.125126	1.13373	0.256906	0.86374	CA-CN
Wiz	328.131	0.141842	0.148586	0.954611	0.339774	0.907223	CA-CN
Rnf25	253.559	0.141823	0.135042	1.05022	0.293619	0.882052	CA-CN
Cdkn1a	377.358	0.14175	0.135921	1.04289	0.297001	0.882576	CA-CN
H60b	6.32828	0.141739	0.0856616	1.65464	0.0979977	0.679319	CA-CN
Tada2b	199.371	0.141656	0.147398	0.96104	0.336532	0.906014	CA-CN
Tarbp2	45.0883	0.141529	0.153388	0.922687	0.35617	0.911512	CA-CN
Pstk	52.8737	0.141523	0.155226	0.911722	0.361915	0.91235	CA-CN
Dnaaf2	186.634	0.141501	0.141147	1.00251	0.316098	0.898578	CA-CN
Lysmd1	33.0837	0.141497	0.143873	0.983488	0.325367	0.900685	CA-CN
Hira	397.154	0.141432	0.152891	0.925051	0.35494	0.911512	CA-CN
Map3k20	1012.47	0.141353	0.118107	1.19682	0.231378	0.846016	CA-CN
Wdr5b	94.5197	0.141302	0.152716	0.925259	0.354831	0.911512	CA-CN
Crispld2	23.2967	0.141257	0.136446	1.03525	0.300551	0.885331	CA-CN
Mafk	259.916	0.141245	0.139021	1.01599	0.309633	0.892452	CA-CN
Cc2d1a	219.063	0.14122	0.145735	0.96902	0.332535	0.904129	CA-CN
Zbtb11	468.77	0.141146	0.130561	1.08108	0.279662	0.879155	CA-CN
Gas2l3	696.034	0.141105	0.108121	1.30506	0.191873	0.82253	CA-CN
Rhot2	422.335	0.141098	0.126991	1.11108	0.266532	0.870713	CA-CN
Ints2	334.971	0.140966	0.124089	1.13601	0.255952	0.863143	CA-CN
H2afy2	10.0914	0.140902	0.109965	1.28133	0.200079	0.826736	CA-CN
Ldhb	111.744	0.14082	0.15239	0.924078	0.355446	0.911512	CA-CN
Ceacam18	13.9142	0.140709	0.124547	1.12976	0.258576	0.865833	CA-CN
Myef2	206.313	0.140707	0.137323	1.02465	0.30553	0.889465	CA-CN
Slc25a25	196.281	0.140687	0.144683	0.972381	0.330861	0.903711	CA-CN
Slc38a10	896.998	0.140505	0.133119	1.05549	0.291203	0.882052	CA-CN
Arhgap33	256.9	0.140459	0.137656	1.02037	0.307554	0.890212	CA-CN
Msh6	363.007	0.14042	0.134852	1.0413	0.297738	0.883153	CA-CN
Nsd2	1153.28	0.140398	0.120267	1.16739	0.243053	0.852872	CA-CN
A630001G21Rik	442.283	0.140372	0.129413	1.08468	0.278063	0.877876	CA-CN
Cd2bp2	475.692	0.140371	0.130373	1.07668	0.281623	0.881569	CA-CN
Fam151a	111.713	0.140368	0.153811	0.912605	0.36145	0.91235	CA-CN
Dync2h1	119.568	0.140366	0.149251	0.940467	0.346978	0.910968	CA-CN
Mrps5	66.3345	0.140246	0.155565	0.901528	0.367308	0.913125	CA-CN
Pkib	268.658	0.140218	0.143	0.980546	0.326817	0.901373	CA-CN
Tlr1	405.928	0.140048	0.128853	1.08688	0.27709	0.877876	CA-CN
Nol6	384.392	0.140025	0.149753	0.93504	0.349768	0.911071	CA-CN
Pecam1	178.163	0.140019	0.14198	0.986185	0.324042	0.900489	CA-CN
Tab1	270.489	0.140018	0.133524	1.04863	0.294347	0.882052	CA-CN
Rinl	477.206	0.140016	0.134833	1.03844	0.299064	0.88499	CA-CN
Scamp1	311.411	0.139995	0.134195	1.04323	0.296844	0.882576	CA-CN
Dennd6b	38.0139	0.139933	0.147947	0.945829	0.344236	0.909467	CA-CN
Supt6	916.31	0.139929	0.1289	1.08556	0.277673	0.877876	CA-CN
Dap3	430.199	0.139916	0.120622	1.15995	0.246067	0.853667	CA-CN
R3hcc1	62.2103	0.139816	0.15605	0.895966	0.370271	0.914419	CA-CN
Lamtor2	224.578	0.139761	0.131621	1.06184	0.288309	0.882052	CA-CN
Gm10865	13.1543	0.139686	0.114516	1.2198	0.222541	0.839202	CA-CN
Map7	41.5018	0.139544	0.153555	0.908759	0.363477	0.912431	CA-CN
Mypop	20.3557	0.139524	0.135002	1.0335	0.301369	0.885331	CA-CN
Acta2	98.2257	0.139446	0.154619	0.901872	0.367125	0.913125	CA-CN
Tex9	69.8281	0.139399	0.155604	0.89586	0.370328	0.914419	CA-CN
Gins3	198.385	0.139359	0.137996	1.00987	0.312556	0.895538	CA-CN
Tor2a	313.072	0.13935	0.128436	1.08498	0.277933	0.877876	CA-CN
Cluh	579.466	0.139341	0.131818	1.05707	0.29048	0.882052	CA-CN
Them4	28.8366	0.139292	0.145222	0.959169	0.337474	0.906786	CA-CN
Gadd45gip1	338.669	0.139188	0.126045	1.10428	0.269472	0.873688	CA-CN
G2e3	845.451	0.139171	0.118774	1.17172	0.241308	0.850812	CA-CN
Golm1	562.614	0.13901	0.113931	1.22012	0.222418	0.839019	CA-CN
Atad3a	111.061	0.13898	0.155336	0.894707	0.370944	0.914419	CA-CN
Pbdc1	219.016	0.138893	0.146847	0.945835	0.344233	0.909467	CA-CN
Kcnk12	112.778	0.138873	0.155504	0.893052	0.371829	0.914419	CA-CN
Utp3	393.488	0.138844	0.121847	1.13949	0.254498	0.860701	CA-CN
Rnf8	200.421	0.138822	0.1374	1.01035	0.31233	0.895538	CA-CN
Kcna3	213.103	0.138805	0.137302	1.01095	0.312043	0.895538	CA-CN
Syt6	21.1439	0.138774	0.132399	1.04815	0.294571	0.882052	CA-CN
Alas1	472.556	0.138678	0.142423	0.973703	0.330204	0.903358	CA-CN
Mrgbp	211.871	0.13866	0.135176	1.02578	0.304997	0.888774	CA-CN
Klc1	551.976	0.138652	0.120843	1.14737	0.25123	0.858659	CA-CN
Tbrg4	361.526	0.138571	0.144045	0.961995	0.336052	0.906014	CA-CN
Hk1	708.313	0.13847	0.127508	1.08597	0.277494	0.877876	CA-CN
Pou2f1	539.981	0.138374	0.130848	1.05752	0.290276	0.882052	CA-CN
Mrs2	306.916	0.138323	0.136911	1.01032	0.312343	0.895538	CA-CN
Ticrr	333.983	0.138315	0.153686	0.899979	0.368131	0.913505	CA-CN
Gm4737	57.8136	0.138312	0.155704	0.888302	0.374378	0.914419	CA-CN
Dph3	255.145	0.138245	0.145585	0.949586	0.342323	0.907805	CA-CN
Gdf9	22.7606	0.1382	0.133944	1.03178	0.302176	0.885331	CA-CN
Myb	310.548	0.138174	0.138345	0.998762	0.31791	0.89945	CA-CN
Arhgap11a	993.225	0.138154	0.114554	1.20601	0.227813	0.844735	CA-CN
Zc3hc1	217.168	0.138132	0.135321	1.02077	0.307362	0.890212	CA-CN
Btbd9	302.204	0.13793	0.143159	0.96347	0.335311	0.905743	CA-CN
Rrs1	114.011	0.137843	0.15153	0.90967	0.362997	0.912431	CA-CN
Cbx6	198.71	0.13774	0.153963	0.89463	0.370985	0.914419	CA-CN
Cks1b	271.134	0.137734	0.13471	1.02245	0.306569	0.890193	CA-CN
Tbc1d24	253.856	0.137651	0.13903	0.990082	0.322134	0.900489	CA-CN
C030005K06Rik	52.9557	0.137626	0.154664	0.88984	0.373552	0.914419	CA-CN
Wrb	75.633	0.137573	0.154559	0.890102	0.373411	0.914419	CA-CN
E230016M11Rik	43.3102	0.137563	0.153833	0.894236	0.371196	0.914419	CA-CN
Sh3bp5l	226.556	0.137554	0.139403	0.986732	0.323774	0.900489	CA-CN
2210016F16Rik	278.272	0.137523	0.128623	1.0692	0.284981	0.882052	CA-CN
Nipa2	806.103	0.13738	0.105621	1.30069	0.193365	0.823621	CA-CN
Hjurp	2644.32	0.13737	0.0915069	1.5012	0.133303	0.748788	CA-CN
Zscan22	89.81	0.137352	0.155096	0.885592	0.375838	0.914419	CA-CN
Trappc4	311.373	0.137301	0.130928	1.04867	0.29433	0.882052	CA-CN
Ciapin1	229.43	0.137284	0.143325	0.957848	0.33814	0.906786	CA-CN
Gspt1	1085.37	0.137227	0.0988768	1.38786	0.16518	0.790561	CA-CN
Wbp1l	824.132	0.137176	0.116409	1.1784	0.238636	0.850315	CA-CN
Mib1	590.683	0.137174	0.110128	1.24558	0.212919	0.832697	CA-CN
Ptpn1	2686.07	0.137163	0.106701	1.2855	0.198619	0.826016	CA-CN
6330409D20Rik	10.2279	0.137135	0.112607	1.21782	0.223294	0.840202	CA-CN
Smim27	51.9577	0.136993	0.150545	0.90998	0.362833	0.912431	CA-CN
Zfp825	81.547	0.136979	0.155545	0.880639	0.378513	0.914419	CA-CN
Mast2	581.007	0.136861	0.149851	0.913315	0.361077	0.912179	CA-CN
Timm23	11.9577	0.136816	0.122698	1.11507	0.264822	0.870308	CA-CN
Zfp41	126.863	0.136767	0.156007	0.876672	0.380665	0.914419	CA-CN
Casp12	15.5166	0.136682	0.118963	1.14894	0.250579	0.858659	CA-CN
Dgcr2	711.814	0.136655	0.135818	1.00616	0.314337	0.896951	CA-CN
Ext2	403.021	0.136647	0.131008	1.04304	0.296929	0.882576	CA-CN
Mtmr12	429.046	0.136542	0.129617	1.05343	0.292143	0.882052	CA-CN
Amz1	186.294	0.136537	0.141905	0.962173	0.335963	0.906014	CA-CN
Gga3	655.406	0.136491	0.10687	1.27717	0.201542	0.828034	CA-CN
Rnasel	816.841	0.136466	0.112166	1.21664	0.223743	0.840202	CA-CN
Ubap1	496.565	0.136316	0.121909	1.11818	0.26349	0.869249	CA-CN
Aqr	704.302	0.136307	0.12095	1.12697	0.259756	0.867257	CA-CN
Cenpj	221.463	0.136277	0.137927	0.988032	0.323137	0.900489	CA-CN
Zfp109	23.709	0.136181	0.142334	0.956769	0.338684	0.906786	CA-CN
Tmem268	815.341	0.136131	0.119662	1.13763	0.255274	0.862065	CA-CN
Dsn1	263.748	0.136061	0.136609	0.995984	0.319258	0.89945	CA-CN
Ilf3	487.447	0.136058	0.127942	1.06343	0.287585	0.882052	CA-CN
Tmem97	81.9064	0.136013	0.156045	0.871627	0.383412	0.914419	CA-CN
Sptbn1	2284.68	0.135977	0.121169	1.12221	0.261771	0.867602	CA-CN
Ripor2	1078.82	0.135877	0.11506	1.18093	0.237632	0.850315	CA-CN
C87436	272.432	0.135819	0.131625	1.03186	0.302136	0.885331	CA-CN
Etfbkmt	52.5971	0.135807	0.153295	0.885917	0.375662	0.914419	CA-CN
Ddx10	277.3	0.135771	0.131208	1.03478	0.300774	0.885331	CA-CN
Sf3a3	384.66	0.135761	0.128616	1.05555	0.291175	0.882052	CA-CN
Ccdc138	35.304	0.135715	0.148319	0.915025	0.360179	0.911704	CA-CN
Ckap2	473.177	0.135597	0.1193	1.13661	0.255703	0.862996	CA-CN
Lonrf3	615.501	0.135559	0.122593	1.10576	0.26883	0.87342	CA-CN
Zfp513	266.496	0.135541	0.131222	1.03291	0.301646	0.885331	CA-CN
Ngdn	278.874	0.135527	0.139199	0.973619	0.330246	0.903358	CA-CN
Ttl	95.1328	0.135512	0.155443	0.871783	0.383327	0.914419	CA-CN
Itsn1	281.55	0.135509	0.135407	1.00076	0.316944	0.899124	CA-CN
Cdkl5	23.1585	0.135491	0.140877	0.961768	0.336166	0.906014	CA-CN
Cd93	1977.75	0.135404	0.1262	1.07293	0.283305	0.882052	CA-CN
Hyls1	177.139	0.135335	0.147364	0.91837	0.358425	0.911704	CA-CN
Fbxo34	272.376	0.135275	0.131121	1.03168	0.302223	0.885331	CA-CN
Dse	860.159	0.135255	0.10667	1.26798	0.204806	0.828034	CA-CN
4933417D19Rik	8.332	0.13524	0.105774	1.27858	0.201045	0.828034	CA-CN
Mapk6	580.923	0.135235	0.112437	1.20276	0.229069	0.845222	CA-CN
Ubox5	103.438	0.135231	0.155687	0.868606	0.385062	0.914419	CA-CN
Rad51ap1	309.299	0.135224	0.124268	1.08817	0.276519	0.877876	CA-CN
Scap	329.866	0.135207	0.142304	0.950126	0.342048	0.907717	CA-CN
Dynlt1f	23.7311	0.1352	0.144377	0.936433	0.34905	0.911071	CA-CN
Dynlt1c	23.7311	0.1352	0.144377	0.936433	0.34905	0.911071	CA-CN
Hdhd5	176.089	0.135002	0.141023	0.9573	0.338416	0.906786	CA-CN
Lig1	752.341	0.134992	0.141314	0.955261	0.339446	0.906976	CA-CN
Tubgcp3	773.066	0.134947	0.102632	1.31486	0.188556	0.820001	CA-CN
Uxt	25.7018	0.134943	0.142136	0.949393	0.342421	0.907852	CA-CN
Kctd5	304.52	0.13491	0.128997	1.04584	0.295635	0.882576	CA-CN
Phf1	253.873	0.134872	0.136737	0.98636	0.323956	0.900489	CA-CN
Fzd4	134.051	0.134734	0.1483	0.908521	0.363603	0.912431	CA-CN
Tmem86b	80.7525	0.134612	0.154948	0.868759	0.384979	0.914419	CA-CN
Rnf170	80.1457	0.134604	0.156032	0.86267	0.388319	0.914419	CA-CN
Cpt2	211.224	0.134575	0.14345	0.938132	0.348177	0.911071	CA-CN
Ncln	1282.43	0.134526	0.125945	1.06813	0.28546	0.882052	CA-CN
Tsen15	23.88	0.13452	0.144708	0.929597	0.35258	0.911512	CA-CN
Igfbp4	185.967	0.13452	0.154932	0.868247	0.385259	0.914419	CA-CN
Tmem42	19.8505	0.134493	0.137517	0.978008	0.32807	0.901935	CA-CN
Mrpl48	224.019	0.134461	0.134991	0.996075	0.319213	0.89945	CA-CN
Ndufv1	540.195	0.134302	0.114084	1.17722	0.239107	0.850315	CA-CN
Cox11	76.2249	0.134065	0.154908	0.865445	0.386794	0.914419	CA-CN
Kin	166.888	0.133878	0.150607	0.888923	0.374044	0.914419	CA-CN
Zdhhc2	22.4622	0.133865	0.137897	0.970762	0.331667	0.903836	CA-CN
Abhd18	62.19	0.133857	0.155901	0.858605	0.390559	0.914419	CA-CN
Klhl5	988.473	0.133791	0.100272	1.33428	0.182112	0.80984	CA-CN
Snx21	114.08	0.133728	0.151671	0.881698	0.37794	0.914419	CA-CN
Slc35g1	43.9071	0.133689	0.15404	0.867884	0.385458	0.914419	CA-CN
Ptges	34.6077	0.133638	0.147408	0.906586	0.364626	0.912841	CA-CN
Htt	883.529	0.133619	0.123348	1.08326	0.278691	0.87896	CA-CN
Csnk1g1	582.39	0.133275	0.11212	1.18868	0.234564	0.848265	CA-CN
Phc1	107.586	0.133261	0.15487	0.860471	0.389529	0.914419	CA-CN
Stx18	257.941	0.133202	0.138631	0.960836	0.336635	0.906014	CA-CN
Shmt1	88.6421	0.133116	0.154398	0.862161	0.388599	0.914419	CA-CN
Gnptg	167.72	0.133099	0.14519	0.916723	0.359288	0.911704	CA-CN
Acvr1	158.09	0.13295	0.150673	0.882374	0.377575	0.914419	CA-CN
Pkp3	97.8437	0.132878	0.155407	0.855032	0.392534	0.914419	CA-CN
Dtd1	45.3235	0.132843	0.152579	0.870649	0.383946	0.914419	CA-CN
Nek4	110.66	0.132817	0.151528	0.87652	0.380748	0.914419	CA-CN
Ccdc91	117.557	0.132758	0.152382	0.87122	0.383634	0.914419	CA-CN
Sgms2	969.89	0.132736	0.123485	1.07491	0.282413	0.881569	CA-CN
Hoxb4	166.104	0.132697	0.143841	0.922526	0.356254	0.911512	CA-CN
Osbpl11	559.255	0.132684	0.118951	1.11545	0.264659	0.870308	CA-CN
Gabarapl1	203.717	0.132678	0.142323	0.93223	0.351218	0.911512	CA-CN
Sfxn1	400.989	0.132676	0.119629	1.10907	0.267402	0.871856	CA-CN
Zzef1	1182.38	0.132607	0.125114	1.05989	0.289196	0.882052	CA-CN
Tbcb	235.201	0.132559	0.136508	0.971072	0.331512	0.903711	CA-CN
Mvb12b	265.398	0.132557	0.15242	0.869684	0.384473	0.914419	CA-CN
8430429K09Rik	17.502	0.132423	0.124713	1.06182	0.288316	0.882052	CA-CN
Mical1	603.398	0.132355	0.112706	1.17434	0.240259	0.850315	CA-CN
Aaas	304.78	0.132207	0.130952	1.00959	0.312694	0.895538	CA-CN
Fbxl5	1027.77	0.132144	0.131073	1.00817	0.313372	0.896605	CA-CN
[truncated: 9,314 more rows]

## Sheet: padj<0.05
GENE	baseMean	log2FoldChange	lfcSE	stat	pvalue	padj	contrast
Gcnt2	321.951	1.35569	0.132672	10.2183	1.64118e-24	1.85666e-20	CA-CN
Socs3	172.461	1.22176	0.15423	7.92166	2.34353e-15	8.83747e-12	CA-CN
Pbx1	587.864	0.989281	0.119699	8.26477	1.39965e-16	7.9171e-13	CA-CN
Cd244	597.859	0.919402	0.129595	7.09443	1.29887e-12	2.44901e-09	CA-CN
Lamc1	85.0365	0.874637	0.155653	5.61914	1.91914e-08	1.44742e-05	CA-CN
Galnt6	144.464	0.833288	0.146557	5.68578	1.30221e-08	1.05228e-05	CA-CN
F11r	45.8529	0.824931	0.150275	5.48947	4.03136e-08	2.68275e-05	CA-CN
Lrg1	31.7964	0.8214	0.140099	5.86299	4.54607e-09	4.2858e-06	CA-CN
Irf2bpl	207.97	0.788453	0.146513	5.38146	7.38842e-08	3.98025e-05	CA-CN
Tppp3	295.56	0.753704	0.146031	5.16127	2.45286e-07	0.000108288	CA-CN
Vcan	3241.01	0.732368	0.109742	6.67352	2.49736e-11	4.03609e-08	CA-CN
Shtn1	260.947	0.731099	0.141726	5.15855	2.48871e-07	0.000108288	CA-CN
Phospho1	111.67	0.710796	0.154894	4.58892	4.45555e-06	0.00129245	CA-CN
Rfx2	120.58	0.693023	0.152668	4.53941	5.64119e-06	0.00155656	CA-CN
A730081D07Rik	56.637	0.648264	0.155797	4.16096	3.1691e-05	0.00607661	CA-CN
Lcn2	305.781	0.6449	0.137985	4.67369	2.95842e-06	0.000929684	CA-CN
Il18rap	70.315	0.636994	0.155977	4.08389	4.42878e-05	0.00747802	CA-CN
Jak3	325.723	0.636858	0.143673	4.43269	9.30652e-06	0.00206441	CA-CN
Havcr2	118.978	0.634138	0.152151	4.16781	3.07541e-05	0.00599863	CA-CN
Slc12a7	174.18	0.624716	0.140293	4.45295	8.46975e-06	0.0019522	CA-CN
Aig1	66.6542	0.593391	0.15594	3.80526	0.000141658	0.0180064	CA-CN
Atp11a	1277.01	0.587932	0.123172	4.77327	1.81256e-06	0.00061417	CA-CN
Retreg1	204.537	0.579058	0.137114	4.22317	2.40886e-05	0.00478095	CA-CN
Eps8	697.363	0.575256	0.125252	4.59281	4.37327e-06	0.00129245	CA-CN
Sema6b	163.069	0.573637	0.152752	3.75535	0.000173102	0.0208674	CA-CN
Cttnbp2nl	56.7383	0.571472	0.154966	3.68773	0.000226268	0.0243788	CA-CN
Abi3	733.021	0.570168	0.128157	4.44897	8.62812e-06	0.0019522	CA-CN
Abca13	108.894	0.56539	0.153607	3.68075	0.000232548	0.024819	CA-CN
Treml4	198.525	0.563738	0.155741	3.61971	0.000294928	0.029141	CA-CN
Ahr	410.605	0.559801	0.12221	4.58064	4.63558e-06	0.00131106	CA-CN
C1rl	356.334	0.547755	0.13505	4.05595	4.99309e-05	0.00830688	CA-CN
Ptgfrn	155.425	0.543216	0.15589	3.48461	0.00049285	0.0409971	CA-CN
Sh2d1b1	172.95	0.538274	0.153827	3.49922	0.000466626	0.0396912	CA-CN
Sfxn5	197.782	0.538194	0.136034	3.95631	7.61171e-05	0.0111833	CA-CN
Ier3	63.9882	0.536476	0.155623	3.44728	0.000566268	0.0429753	CA-CN
Fads1	118.037	0.535646	0.154286	3.47178	0.000517021	0.0413272	CA-CN
Gcat	91.9816	0.534066	0.154901	3.4478	0.000565175	0.0429753	CA-CN
Pam	153.47	0.533033	0.153572	3.47089	0.000518736	0.0413272	CA-CN
B4galt6	513.204	0.532051	0.13806	3.85376	0.00011632	0.0156657	CA-CN
Camk2d	1047.72	0.527574	0.105961	4.97893	6.39383e-07	0.000241111	CA-CN
Tmem132a	117.048	0.524928	0.151561	3.46348	0.000533235	0.0418923	CA-CN
Nrg1	242.891	0.523367	0.146772	3.56585	0.000362676	0.0336347	CA-CN
C4b	36.2078	0.514834	0.149488	3.44397	0.000573233	0.0429753	CA-CN
Selp	31.3923	0.506775	0.145899	3.47347	0.000513769	0.0413272	CA-CN
Slc52a3	36.5632	0.496653	0.142239	3.49168	0.000479996	0.0403881	CA-CN
Soat2	18.919	0.490069	0.133813	3.66235	0.000249913	0.0259382	CA-CN
Kdm6b	700.646	0.476978	0.129798	3.67478	0.000238056	0.0249363	CA-CN
Cd300lf	303.699	0.460943	0.129704	3.55381	0.00037969	0.0346405	CA-CN
Pla2g7	721.875	0.450714	0.116867	3.85663	0.000114961	0.0156657	CA-CN
Cenpf	1257.56	0.376107	0.106067	3.54593	0.000391233	0.0354081	CA-CN
Eef2	4983.25	-0.306455	0.0884137	-3.46615	0.000527974	0.041769	CA-CN
Pld4	3351.37	-0.315651	0.0885211	-3.56582	0.000362719	0.0336347	CA-CN
Npc2	3253.59	-0.320745	0.092315	-3.47446	0.000511879	0.0413272	CA-CN
H2-D1	2686.47	-0.33606	0.0882297	-3.80892	0.000139573	0.0180064	CA-CN
Lamp1	4004.09	-0.336168	0.0879435	-3.82254	0.000132083	0.017375	CA-CN
Itm2b	3357.35	-0.339102	0.098105	-3.45652	0.000547194	0.0421116	CA-CN
Degs1	1806.76	-0.339353	0.0975956	-3.47714	0.000506799	0.0413272	CA-CN
Coro1a	3952.84	-0.3394	0.096877	-3.50341	0.00045934	0.0394657	CA-CN
Ly6e	3336.12	-0.340197	0.0987856	-3.44379	0.000573612	0.0429753	CA-CN
Tmem206	1056.73	-0.340819	0.100343	-3.39653	0.000682459	0.0491762	CA-CN
Arpc2	2940.8	-0.341234	0.0966469	-3.53073	0.000414415	0.0372085	CA-CN
Actb	6018.57	-0.34874	0.0938583	-3.7156	0.00020272	0.0229337	CA-CN
Plbd1	2611.04	-0.350895	0.0947132	-3.70482	0.000211542	0.0234625	CA-CN
Kctd12	5140.27	-0.351757	0.08882	-3.96034	7.48436e-05	0.0111409	CA-CN
Ap1s2	1627.94	-0.356403	0.102578	-3.47446	0.000511876	0.0413272	CA-CN
Camkk2	2535.37	-0.358381	0.0995751	-3.59911	0.000319313	0.0306134	CA-CN
Psap	7369.85	-0.365489	0.0903161	-4.04678	5.1927e-05	0.00844828	CA-CN
Samhd1	5533.01	-0.365962	0.0883417	-4.14257	3.43434e-05	0.00647545	CA-CN
H2-K1	2214.59	-0.369881	0.0894494	-4.13509	3.54816e-05	0.00658039	CA-CN
Padi4	769.722	-0.371502	0.109372	-3.39668	0.000682093	0.0491762	CA-CN
Rack1	2286.19	-0.372736	0.109209	-3.41307	0.000642358	0.0468839	CA-CN
Lgals9	919.466	-0.377036	0.107395	-3.51074	0.000446856	0.0391882	CA-CN
Gpx1	2349.09	-0.379166	0.106067	-3.57476	0.000350546	0.0333254	CA-CN
Serinc3	4926.21	-0.379364	0.0971844	-3.90355	9.47909e-05	0.0134046	CA-CN
Sp100	2388.27	-0.385809	0.103608	-3.72375	0.000196289	0.0227729	CA-CN
Prkcd	3384.69	-0.393219	0.0867257	-4.53405	5.78627e-06	0.00155857	CA-CN
Ms4a6c	3070.22	-0.393244	0.114777	-3.42615	0.000612194	0.0452663	CA-CN
Cybb	9172.98	-0.393909	0.0957296	-4.1148	3.87508e-05	0.00695855	CA-CN
Lilra6	1015.21	-0.395166	0.109577	-3.6063	0.000310597	0.0302913	CA-CN
Tmsb4x	2879.42	-0.396866	0.115899	-3.42424	0.000616519	0.0452901	CA-CN
Cd180	1625.34	-0.397746	0.112956	-3.52126	0.000429504	0.0379607	CA-CN
F13a1	8999.43	-0.398965	0.106251	-3.75493	0.000173388	0.0208674	CA-CN
Clec4a1	1474.15	-0.400418	0.114315	-3.50275	0.000460485	0.0394657	CA-CN
Ccl6	2285.25	-0.400922	0.10735	-3.73471	0.000187934	0.0221468	CA-CN
Txnip	3339.91	-0.406042	0.0993265	-4.08795	4.35203e-05	0.00747802	CA-CN
Mpeg1	9953.48	-0.415211	0.096012	-4.32457	1.52828e-05	0.00326216	CA-CN
Arhgef3	1141.32	-0.415493	0.113057	-3.67508	0.000237777	0.0249363	CA-CN
Abca9	1820.85	-0.419401	0.102652	-4.08567	4.39502e-05	0.00747802	CA-CN
Cyp27a1	1084.55	-0.426073	0.117746	-3.61858	0.000296226	0.029141	CA-CN
Ifi209	2192.42	-0.427778	0.123718	-3.4577	0.000544815	0.0421116	CA-CN
Ifitm3	1618.24	-0.427977	0.114991	-3.72184	0.000197776	0.0227729	CA-CN
Trim30d	858.036	-0.439109	0.12952	-3.39028	0.000698214	0.049993	CA-CN
Ly6c2	1875.75	-0.447965	0.108548	-4.12688	3.67724e-05	0.00670978	CA-CN
Cmpk2	966.115	-0.454263	0.116706	-3.89238	9.92669e-05	0.0138643	CA-CN
Mndal	1134.34	-0.456443	0.125246	-3.64436	0.000268054	0.0273828	CA-CN
Klra2	1399.1	-0.45871	0.130775	-3.50764	0.000452103	0.0393434	CA-CN
Ifi211	329.955	-0.460496	0.134064	-3.43491	0.000592757	0.0441175	CA-CN
Lyz2	5648.34	-0.461056	0.117555	-3.92206	8.77949e-05	0.0125724	CA-CN
H2-T24	740.732	-0.465933	0.128205	-3.63427	0.000278766	0.0279087	CA-CN
Slfn5	4085.4	-0.466819	0.103609	-4.50557	6.61941e-06	0.00170194	CA-CN
Uba7	722.322	-0.470957	0.116945	-4.02717	5.64524e-05	0.00887458	CA-CN
B2m	2880.45	-0.473311	0.112048	-4.22419	2.39805e-05	0.00478095	CA-CN
Gm12250	426.108	-0.47717	0.137978	-3.4583	0.000543589	0.0421116	CA-CN
Padi2	1945.4	-0.481478	0.109541	-4.39541	1.10563e-05	0.00240539	CA-CN
Ifi27l2a	628.193	-0.483322	0.130815	-3.6947	0.000220146	0.0241085	CA-CN
Rnase6	1313.73	-0.487965	0.122192	-3.99343	6.51233e-05	0.00995595	CA-CN
Nt5c3	309.804	-0.488559	0.139965	-3.49059	0.000481959	0.0403881	CA-CN
Cx3cr1	2587.44	-0.492305	0.0942374	-5.22409	1.7501e-07	8.63336e-05	CA-CN
Lmtk2	464.989	-0.499411	0.139955	-3.56838	0.000359199	0.0336347	CA-CN
Mx1	1136.27	-0.500043	0.138813	-3.60228	0.000315439	0.0305005	CA-CN
Ifi204	1465.75	-0.502996	0.126791	-3.96713	7.27428e-05	0.0109725	CA-CN
Irgm1	1006.51	-0.515053	0.132447	-3.88874	0.000100768	0.0139022	CA-CN
Stat1	2310.48	-0.517629	0.0935384	-5.53387	3.13248e-08	2.21486e-05	CA-CN
Cd177	1729.94	-0.518519	0.0961325	-5.3938	6.89831e-08	3.90203e-05	CA-CN
Slamf8	307.681	-0.518972	0.136756	-3.79489	0.000147709	0.0182468	CA-CN
St3gal6	22.9696	-0.519045	0.139531	-3.71992	0.000199286	0.0227729	CA-CN
Phf11b	193.814	-0.521781	0.143198	-3.64377	0.000268673	0.0273828	CA-CN
Samd9l	2349.03	-0.526927	0.142015	-3.71036	0.000206961	0.0231817	CA-CN
Tlr11	56.9067	-0.529423	0.150175	-3.52537	0.000422886	0.0376702	CA-CN
Ddx60	185.502	-0.533099	0.149866	-3.55717	0.000374866	0.0344785	CA-CN
Slfn1	1453.95	-0.533842	0.111926	-4.76961	1.84582e-06	0.00061417	CA-CN
Adam19	837.81	-0.536304	0.132577	-4.04522	5.22743e-05	0.00844828	CA-CN
Lpl	1151.93	-0.543223	0.145118	-3.74332	0.000181606	0.0216264	CA-CN
Ifi203	2553.95	-0.543883	0.117164	-4.64208	3.44922e-06	0.00105462	CA-CN
Irf7	1082.3	-0.544364	0.122052	-4.46011	8.19182e-06	0.0019522	CA-CN
Ifi47	936.531	-0.548503	0.136205	-4.02705	5.6481e-05	0.00887458	CA-CN
Ifi44	49.1196	-0.555371	0.146391	-3.79375	0.000148387	0.0182468	CA-CN
Upb1	148.902	-0.558742	0.151298	-3.693	0.000221628	0.0241085	CA-CN
Rtp4	276.267	-0.558931	0.146781	-3.80793	0.000140136	0.0180064	CA-CN
Oasl2	955.073	-0.561269	0.109787	-5.11233	3.18202e-07	0.000128565	CA-CN
Adora2a	95.901	-0.562322	0.154662	-3.6358	0.000277115	0.0279087	CA-CN
Itgb3	347.46	-0.581359	0.137242	-4.23601	2.27523e-05	0.00468235	CA-CN
Tnfsf10	107.976	-0.582374	0.152041	-3.83037	0.00012795	0.0170294	CA-CN
Ifi208	57.4902	-0.588411	0.154902	-3.79859	0.000145522	0.0182468	CA-CN
Tmem26	57.1141	-0.607764	0.154893	-3.92377	8.71757e-05	0.0125724	CA-CN
Gbp2	470.329	-0.612652	0.130979	-4.67747	2.9043e-06	0.000929684	CA-CN
Btla	972.15	-0.612867	0.136237	-4.49853	6.8426e-06	0.00172023	CA-CN
Ifit3b	53.5489	-0.612872	0.152891	-4.00855	6.10931e-05	0.00946776	CA-CN
Eps8l1	119.639	-0.623884	0.151801	-4.10987	3.95889e-05	0.00699795	CA-CN
Slc46a3	468.352	-0.625851	0.129062	-4.84922	1.23945e-06	0.000438186	CA-CN
Ifit1	309.317	-0.658847	0.155539	-4.2359	2.2764e-05	0.00468235	CA-CN
Gm5431	154.531	-0.66144	0.148031	-4.46824	7.8864e-06	0.00193954	CA-CN
Cxcl10	133.085	-0.685593	0.154065	-4.45002	8.58619e-06	0.0019522	CA-CN
Klrk1	82.1944	-0.703507	0.155774	-4.51621	6.29566e-06	0.00165634	CA-CN
Hpgd	429.368	-0.709775	0.145316	-4.88435	1.03772e-06	0.000378699	CA-CN
Siglec1	271.218	-0.753277	0.150182	-5.01575	5.28257e-07	0.000206075	CA-CN
Ifit1bl1	135.718	-0.787233	0.153596	-5.12536	2.96965e-07	0.000124429	CA-CN
Ifi213	148.043	-0.796399	0.15393	-5.17376	2.29432e-07	0.000108149	CA-CN
Phf11d	100.803	-0.800983	0.153341	-5.22355	1.75521e-07	8.63336e-05	CA-CN
Mrc1	235.486	-0.842612	0.143447	-5.87405	4.25272e-09	4.2858e-06	CA-CN
Ifi205	150.468	-0.848366	0.155492	-5.45603	4.86909e-08	2.89916e-05	CA-CN
Aplnr	58.6684	-0.85329	0.156053	-5.46794	4.5529e-08	2.8615e-05	CA-CN
Flt1	115.169	-0.892432	0.155543	-5.73754	9.60636e-09	8.35975e-06	CA-CN
Ifit2	486.182	-0.911165	0.144547	-6.30357	2.90864e-10	3.65616e-07	CA-CN
Itga8	163.218	-0.927719	0.148056	-6.266	3.70449e-10	4.19089e-07	CA-CN
Ifit3	202.59	-0.988886	0.15468	-6.39309	1.62564e-10	2.29886e-07	CA-CN
Rsad2	425.993	-1.0929	0.140816	-7.76118	8.41409e-15	1.90377e-11	CA-CN
Cd209a	179.15	-1.15916	0.147856	-7.83982	4.51177e-15	1.27604e-11	CA-CN

## Sheet: FC>2
GENE	baseMean	log2FoldChange	lfcSE	stat	pvalue	padj	contrast
Gcnt2	321.951	1.35569	0.132672	10.2183	1.64118e-24	1.85666e-20	CA-CN
Socs3	172.461	1.22176	0.15423	7.92166	2.34353e-15	8.83747e-12	CA-CN
Cd209a	179.15	-1.15916	0.147856	-7.83982	4.51177e-15	1.27604e-11	CA-CN
Rsad2	425.993	-1.0929	0.140816	-7.76118	8.41409e-15	1.90377e-11	CA-CN

## Sheet: Genes involved in proliferation
GENE	baseMean	log2FoldChange	lfcSE	stat	pvalue	padj	contrast
Pbx1	587.864	0.989281	0.119699	8.26477	1.39965e-16	7.9171e-13	CA-CN
Ier3	63.9882	0.536476	0.155623	3.44728	0.000566268	0.0429753	CA-CN
Cenpf	1257.56	0.376107	0.106067	3.54593	0.000391233	0.0354081	CA-CN
Camk2d	1047.72	0.527574	0.105961	4.97893	6.39383e-07	0.000241111	CA-CN
Eps8	697.363	0.575256	0.125252	4.59281	4.37327e-06	0.00129245	CA-CN
Ahr	410.605	0.559801	0.12221	4.58064	4.63558e-06	0.00131106	CA-CN
Vcan	3241.01	0.732368	0.109742	6.67352	2.49736e-11	4.03609e-08	CA-CN
