# Supplementary material for: Systemic Influences of Mammary Cancer on Monocytes in Mice
Source: Cancers (Basel). 2022 Feb 7;14(3):833. doi: 10.3390/cancers14030833 (PMC8834227; doi:10.3390/cancers14030833)
Supplement: Supplementary file 1 [file cancers-14-00833-s001.zip › Table S3 Bone and blood common DEGs.xlsx]

## Sheet: Sheet1
Bone								Blood
GENE	baseMean	log2FoldChange	lfcSE	stat	pvalue	padj	contrast	GENE	baseMean	log2FoldChange	lfcSE	stat	pvalue	padj	contrast
Abca9	1820.85	-0.419401	0.102652	-4.08567	4.39502e-05	0.00747802	CA-CN	Abca9	14220.8	-0.417471	0.0861213	-4.84747	1.25043e-06	8.55862e-05	CA-CN
Aig1	66.6542	0.593391	0.15594	3.80526	0.000141658	0.0180064	CA-CN	Aig1	336.648	0.552828	0.176266	3.13633	0.00171074	0.0273464	CA-CN
Aplnr	58.6684	-0.85329	0.156053	-5.46794	4.5529e-08	2.8615e-05	CA-CN	Aplnr	749.27	-1.6013	0.182637	-8.76767	1.82401e-18	1.52589e-15	CA-CN
Atp11a	1277.01	0.587932	0.123172	4.77327	1.81256e-06	0.00061417	CA-CN	Atp11a	5183.52	0.796055	0.134523	5.9176	3.26681e-09	5.01955e-07	CA-CN
B4galt6	513.204	0.532051	0.13806	3.85376	0.00011632	0.0156657	CA-CN	B4galt6	2254.54	0.373582	0.106946	3.49319	0.00047728	0.010446	CA-CN
Btla	972.15	-0.612867	0.136237	-4.49853	6.8426e-06	0.00172023	CA-CN	Btla	2300.09	-0.820877	0.116535	-7.04406	1.86712e-12	5.02054e-10	CA-CN
C1rl	356.334	0.547755	0.13505	4.05595	4.99309e-05	0.00830688	CA-CN	C1rl	1328.39	1.09907	0.132098	8.32006	8.79173e-17	4.41286e-14	CA-CN
Camk2d	1047.72	0.527574	0.105961	4.97893	6.39383e-07	0.000241111	CA-CN	Camk2d	9096.42	0.484582	0.101183	4.78915	1.67491e-06	0.000106868	CA-CN
Camkk2	2535.37	-0.358381	0.0995751	-3.59911	0.000319313	0.0306134	CA-CN	Camkk2	25643.7	-0.339034	0.0812748	-4.17146	3.02655e-05	0.00117458	CA-CN
Cd300lf	303.699	0.460943	0.129704	3.55381	0.00037969	0.0346405	CA-CN	Cd300lf	2195.38	0.956979	0.104418	9.1649	4.95948e-20	4.71204e-17	CA-CN
Cmpk2	966.115	-0.454263	0.116706	-3.89238	9.92669e-05	0.0138643	CA-CN	Cmpk2	6098.15	-0.689293	0.0965879	-7.13643	9.5786e-13	2.77374e-10	CA-CN
Cxcl10	133.085	-0.685593	0.154065	-4.45002	8.58619e-06	0.0019522	CA-CN	Cxcl10	1240.45	-1.62603	0.372816	-4.36149	1.29178e-05	0.000582386	CA-CN
Ddx60	185.502	-0.533099	0.149866	-3.55717	0.000374866	0.0344785	CA-CN	Ddx60	1220.72	-0.693729	0.159755	-4.34245	1.40901e-05	0.000620377	CA-CN
Eps8	697.363	0.575256	0.125252	4.59281	4.37327e-06	0.00129245	CA-CN	Eps8	4622.13	0.371964	0.115449	3.22188	0.00127351	0.0218423	CA-CN
F11r	45.8529	0.824931	0.150275	5.48947	4.03136e-08	2.68275e-05	CA-CN	F11r	972.402	2.31329	0.511568	4.52196	6.12709e-06	0.000307539	CA-CN
F13a1	8999.43	-0.398965	0.106251	-3.75493	0.000173388	0.0208674	CA-CN	F13a1	124048	0.290536	0.0988223	2.93998	0.00328232	0.0428294	CA-CN
Galnt6	144.464	0.833288	0.146557	5.68578	1.30221e-08	1.05228e-05	CA-CN	Galnt6	1931.44	0.743579	0.133094	5.58688	2.31184e-08	2.90097e-06	CA-CN
Gcnt2	321.951	1.35569	0.132672	10.2183	1.64118e-24	1.85666e-20	CA-CN	Gcnt2	5376.36	1.35574	0.155395	8.72442	2.67545e-18	2.01434e-15	CA-CN
Gm12250	426.108	-0.47717	0.137978	-3.4583	0.000543589	0.0421116	CA-CN	Gm12250	3692.7	-0.821019	0.155466	-5.28104	1.28454e-07	1.25601e-05	CA-CN
Gm5431	154.531	-0.66144	0.148031	-4.46824	7.8864e-06	0.00193954	CA-CN	Gm5431	2097.61	-0.85058	0.134832	-6.30846	2.81823e-10	5.30462e-08	CA-CN
H2-D1	2686.47	-0.33606	0.0882297	-3.80892	0.000139573	0.0180064	CA-CN	H2-D1	112442	-0.321065	0.105305	-3.04891	0.00229677	0.0334475	CA-CN
H2-K1	2214.59	-0.369881	0.0894494	-4.13509	3.54816e-05	0.00658039	CA-CN	H2-K1	65626.7	-0.485534	0.125342	-3.87367	0.000107209	0.0032287	CA-CN
H2-T24	740.732	-0.465933	0.128205	-3.63427	0.000278766	0.0279087	CA-CN	H2-T24	9294.29	-0.656239	0.131448	-4.99239	5.9636e-07	4.82795e-05	CA-CN
Ier3	63.9882	0.536476	0.155623	3.44728	0.000566268	0.0429753	CA-CN	Ier3	234.209	1.39318	0.235387	5.91868	3.24544e-09	5.01955e-07	CA-CN
Ifi203	2553.95	-0.543883	0.117164	-4.64208	3.44922e-06	0.00105462	CA-CN	Ifi203	18861.4	-0.540044	0.135442	-3.98728	6.68363e-05	0.00219743	CA-CN
Ifi204	1465.75	-0.502996	0.126791	-3.96713	7.27428e-05	0.0109725	CA-CN	Ifi204	18589	-0.38375	0.100595	-3.81482	0.000136281	0.00391626	CA-CN
Ifi205	150.468	-0.848366	0.155492	-5.45603	4.86909e-08	2.89916e-05	CA-CN	Ifi205	2077.12	-1.27626	0.417812	-3.05463	0.00225335	0.0331356	CA-CN
Ifi208	57.4902	-0.588411	0.154902	-3.79859	0.000145522	0.0182468	CA-CN	Ifi208	647.015	-1.44467	0.195124	-7.40385	1.32287e-13	4.52724e-11	CA-CN
Ifi209	2192.42	-0.427778	0.123718	-3.4577	0.000544815	0.0421116	CA-CN	Ifi209	19795.2	-0.534746	0.116352	-4.59593	4.30818e-06	0.000231688	CA-CN
Ifi211	329.955	-0.460496	0.134064	-3.43491	0.000592757	0.0441175	CA-CN	Ifi211	4121.16	-0.514091	0.120524	-4.26548	1.99477e-05	0.000829756	CA-CN
Ifi213	148.043	-0.796399	0.15393	-5.17376	2.29432e-07	0.000108149	CA-CN	Ifi213	1239.24	-0.783155	0.159774	-4.90165	9.50359e-07	7.01495e-05	CA-CN
Ifi47	936.531	-0.548503	0.136205	-4.02705	5.6481e-05	0.00887458	CA-CN	Ifi47	11311.3	-0.840518	0.273962	-3.06801	0.00215488	0.0321183	CA-CN
Ifit1	309.317	-0.658847	0.155539	-4.2359	2.2764e-05	0.00468235	CA-CN	Ifit1	2712.51	-1.00201	0.166013	-6.03576	1.58214e-09	2.83044e-07	CA-CN
Ifit1bl1	135.718	-0.787233	0.153596	-5.12536	2.96965e-07	0.000124429	CA-CN	Ifit1bl1	1647.43	-1.47948	0.144588	-10.2324	1.41976e-24	2.13787e-21	CA-CN
Ifit2	486.182	-0.911165	0.144547	-6.30357	2.90864e-10	3.65616e-07	CA-CN	Ifit2	5138.08	-1.47345	0.142395	-10.3477	4.28879e-25	8.07257e-22	CA-CN
Ifit3	202.59	-0.988886	0.15468	-6.39309	1.62564e-10	2.29886e-07	CA-CN	Ifit3	3427.34	-1.45892	0.174468	-8.3621	6.16123e-17	3.31342e-14	CA-CN
Ifit3b	53.5489	-0.612872	0.152891	-4.00855	6.10931e-05	0.00946776	CA-CN	Ifit3b	685.954	-1.68954	0.210638	-8.02105	1.04845e-15	4.93362e-13	CA-CN
Irf7	1082.3	-0.544364	0.122052	-4.46011	8.19182e-06	0.0019522	CA-CN	Irf7	21068	-0.642235	0.139431	-4.60611	4.10267e-06	0.000223833	CA-CN
Irgm1	1006.51	-0.515053	0.132447	-3.88874	0.000100768	0.0139022	CA-CN	Irgm1	9401.1	-0.632868	0.160066	-3.9538	7.69202e-05	0.00244359	CA-CN
Itgb3	347.46	-0.581359	0.137242	-4.23601	2.27523e-05	0.00468235	CA-CN	Itgb3	1818.11	-0.832358	0.122974	-6.76857	1.30059e-11	2.96732e-09	CA-CN
Jak3	325.723	0.636858	0.143673	4.43269	9.30652e-06	0.00206441	CA-CN	Jak3	3005.85	0.636603	0.112742	5.64655	1.63698e-08	2.12497e-06	CA-CN
Kctd12	5140.27	-0.351757	0.08882	-3.96034	7.48436e-05	0.0111409	CA-CN	Kctd12	31053.8	-0.417138	0.0874616	-4.76938	1.84791e-06	0.000114983	CA-CN
Klrk1	82.1944	-0.703507	0.155774	-4.51621	6.29566e-06	0.00165634	CA-CN	Klrk1	653.4	-1.6318	0.177825	-9.17641	4.45723e-20	4.71204e-17	CA-CN
Lcn2	305.781	0.6449	0.137985	4.67369	2.95842e-06	0.000929684	CA-CN	Lcn2	303.176	2.53132	0.210411	12.0304	2.46085e-33	9.26388e-30	CA-CN
Lmtk2	464.989	-0.499411	0.139955	-3.56838	0.000359199	0.0336347	CA-CN	Lmtk2	1851.79	-0.73463	0.183455	-4.00442	6.21704e-05	0.00208036	CA-CN
Lpl	1151.93	-0.543223	0.145118	-3.74332	0.000181606	0.0216264	CA-CN	Lpl	7042.02	-1.70108	0.139407	-12.2023	3.02144e-34	2.27484e-30	CA-CN
Lrg1	31.7964	0.8214	0.140099	5.86299	4.54607e-09	4.2858e-06	CA-CN	Lrg1	233.753	3.14816	0.567877	5.54373	2.96095e-08	3.53858e-06	CA-CN
Mndal	1134.34	-0.456443	0.125246	-3.64436	0.000268054	0.0273828	CA-CN	Mndal	9645.32	-0.401181	0.107849	-3.71985	0.000199339	0.00536009	CA-CN
Mrc1	235.486	-0.842612	0.143447	-5.87405	4.25272e-09	4.2858e-06	CA-CN	Mrc1	1805.83	-1.60126	0.14945	-10.7144	8.7135e-27	2.1868e-23	CA-CN
Mx1	1136.27	-0.500043	0.138813	-3.60228	0.000315439	0.0305005	CA-CN	Mx1	9069.79	-0.513069	0.140654	-3.64775	0.000264552	0.00666157	CA-CN
Nt5c3	309.804	-0.488559	0.139965	-3.49059	0.000481959	0.0403881	CA-CN	Nt5c3	1844.76	-0.765902	0.145173	-5.2758	1.32175e-07	1.25967e-05	CA-CN
Oasl2	955.073	-0.561269	0.109787	-5.11233	3.18202e-07	0.000128565	CA-CN	Oasl2	17512.2	-0.70908	0.135051	-5.25046	1.51717e-07	1.41022e-05	CA-CN
Pbx1	587.864	0.989281	0.119699	8.26477	1.39965e-16	7.9171e-13	CA-CN	Pbx1	5038.07	1.06636	0.116366	9.16387	5.00681e-20	4.71204e-17	CA-CN
Phf11d	100.803	-0.800983	0.153341	-5.22355	1.75521e-07	8.63336e-05	CA-CN	Phf11d	1056.26	-1.12552	0.211406	-5.32399	1.01515e-07	1.03284e-05	CA-CN
Pla2g7	721.875	0.450714	0.116867	3.85663	0.000114961	0.0156657	CA-CN	Pla2g7	13561.6	0.622505	0.130634	4.76524	1.88624e-06	0.000116406	CA-CN
Ptgfrn	155.425	0.543216	0.15589	3.48461	0.00049285	0.0409971	CA-CN	Ptgfrn	1858.15	0.913055	0.127931	7.1371	9.53236e-13	2.77374e-10	CA-CN
Rfx2	120.58	0.693023	0.152668	4.53941	5.64119e-06	0.00155656	CA-CN	Rfx2	6427.19	-0.391588	0.130995	-2.98934	0.00279577	0.0380533	CA-CN
Rsad2	425.993	-1.0929	0.140816	-7.76118	8.41409e-15	1.90377e-11	CA-CN	Rsad2	5715	-1.24745	0.146195	-8.53279	1.42854e-17	8.27343e-15	CA-CN
Rtp4	276.267	-0.558931	0.146781	-3.80793	0.000140136	0.0180064	CA-CN	Rtp4	4047.62	-0.618551	0.171887	-3.5986	0.000319939	0.00767141	CA-CN
Samd9l	2349.03	-0.526927	0.142015	-3.71036	0.000206961	0.0231817	CA-CN	Samd9l	12141.9	-0.716397	0.144946	-4.94252	7.71175e-07	5.92467e-05	CA-CN
Sema6b	163.069	0.573637	0.152752	3.75535	0.000173102	0.0208674	CA-CN	Sema6b	626.11	0.971235	0.182019	5.33589	9.5076e-08	9.80585e-06	CA-CN
Serinc3	4926.21	-0.379364	0.0971844	-3.90355	9.47909e-05	0.0134046	CA-CN	Serinc3	69695.2	-0.460464	0.0734863	-6.26598	3.70481e-10	6.8033e-08	CA-CN
Sfxn5	197.782	0.538194	0.136034	3.95631	7.61171e-05	0.0111833	CA-CN	Sfxn5	1103.81	0.609965	0.12354	4.93738	7.91793e-07	6.02163e-05	CA-CN
Sh2d1b1	172.95	0.538274	0.153827	3.49922	0.000466626	0.0396912	CA-CN	Sh2d1b1	746.572	0.553942	0.13752	4.02809	5.62313e-05	0.00195877	CA-CN
Slc46a3	468.352	-0.625851	0.129062	-4.84922	1.23945e-06	0.000438186	CA-CN	Slc46a3	3578.75	-0.696769	0.124168	-5.61153	2.0055e-08	2.55922e-06	CA-CN
Slfn5	4085.4	-0.466819	0.103609	-4.50557	6.61941e-06	0.00170194	CA-CN	Slfn5	57496.5	-0.365354	0.109371	-3.3405	0.000836288	0.0159403	CA-CN
Stat1	2310.48	-0.517629	0.0935384	-5.53387	3.13248e-08	2.21486e-05	CA-CN	Stat1	28994.4	-0.665564	0.149728	-4.44516	8.78253e-06	0.00042387	CA-CN
Tlr11	56.9067	-0.529423	0.150175	-3.52537	0.000422886	0.0376702	CA-CN	Tlr11	561.882	-1.33872	0.223307	-5.99496	2.03537e-09	3.4054e-07	CA-CN
Trim30d	858.036	-0.439109	0.12952	-3.39028	0.000698214	0.049993	CA-CN	Trim30d	5668.02	-0.461249	0.104548	-4.41183	1.02501e-05	0.000486691	CA-CN
Vcan	3241.01	0.732368	0.109742	6.67352	2.49736e-11	4.03609e-08	CA-CN	Vcan	15441.2	1.20856	0.138752	8.71023	3.03248e-18	2.0756e-15	CA-CN
