# Supplementary material for: Systemic Influences of Mammary Cancer on Monocytes in Mice
Source: Cancers (Basel). 2022 Feb 7;14(3):833. doi: 10.3390/cancers14030833 (PMC8834227; doi:10.3390/cancers14030833)
Supplement: Supplementary file 1 [file cancers-14-00833-s001.zip › Table S4 FVB mouse blood DEGs .xls]

## Sheet: FVB_allDEGs
GENE	baseMean	log2FoldChange	lfcSE	stat	pvalue	padj	contrast
Wfdc21	87.3946	6.6927	0.955965	-7.00099	2.5416e-12	7.08932e-10	CA-CN
Lrg1	873.154	5.94842	1.25615	-4.73543	2.18596e-06	0.000168403	CA-CN
Retnlg	68.6534	4.60486	1.66369	-2.76787	0.00564246	0.078884	CA-CN
Saa3	619.756	4.24053	1.20107	-3.53063	0.000414573	0.011644	CA-CN
Igfbp6	116.697	4.16665	0.513901	-8.10787	5.15139e-16	3.06656e-13	CA-CN
S100a8	611.596	3.9496	0.779261	-5.06839	4.01205e-07	4.10803e-05	CA-CN
Cxcr2	221.917	3.43333	0.35454	-9.68389	3.53008e-22	7.13871e-19	CA-CN
F11r	235.711	3.2504	0.401074	-8.10424	5.30743e-16	3.06656e-13	CA-CN
S100a9	724.369	3.23357	0.715342	-4.52032	6.17459e-06	0.000396399	CA-CN
Upp1	115	2.67999	0.41102	-6.52034	7.01485e-11	1.66892e-08	CA-CN
Lcn2	290.712	2.66432	0.900997	-2.95708	0.00310564	0.053111	CA-CN
A730081D07Rik	334.768	2.41354	0.278158	-8.67687	4.0682e-18	3.29077e-15	CA-CN
Gcnt2	2160.55	2.35662	0.182388	-12.9209	3.43142e-38	2.77568e-34	CA-CN
Lbp	204.104	2.21202	0.93337	-2.36992	0.0177918	0.159201	CA-CN
Hbb-bt	279.364	2.12316	1.11127	-1.91058	0.0560587	0.304131	CA-CN
Hbb-b2	279.364	2.12316	1.11127	-1.91058	0.0560587	0.304131	CA-CN
Hbb-b1	1405.92	2.05783	0.642134	-3.20467	0.00135219	0.0291676	CA-CN
Hbb-bs	1405.57	2.05757	0.641939	-3.20524	0.00134948	0.0291676	CA-CN
Alas2	120.772	1.96325	0.570973	-3.43843	0.000585101	0.0155176	CA-CN
Hba-a1	1567.42	1.82466	0.585185	-3.11809	0.00182025	0.0358844	CA-CN
Hba-a2	1567.42	1.82466	0.585185	-3.11809	0.00182025	0.0358844	CA-CN
Pam	571.349	1.63449	0.224241	-7.289	3.12255e-13	1.00928e-10	CA-CN
Phospho1	766.159	1.55068	0.183192	-8.46477	2.56664e-17	1.73013e-14	CA-CN
Ppp1r3d	299.638	1.48743	0.267068	-5.56948	2.55497e-08	3.62582e-06	CA-CN
Socs3	4605.93	1.47523	0.182297	-8.09244	5.84821e-16	3.15374e-13	CA-CN
Tarm1	253.58	1.46891	0.31968	-4.59494	4.3287e-06	0.000301852	CA-CN
Ptgfrn	1191.98	1.45208	0.169046	-8.58985	8.70842e-18	6.40386e-15	CA-CN
Arhgap24	332.743	1.45135	0.247335	-5.86797	4.41155e-09	7.28265e-07	CA-CN
Fcnb	92.4959	1.44174	0.494463	-2.91576	0.00354818	0.0576858	CA-CN
Insl3	119.997	1.42217	0.382051	-3.72246	0.000197289	0.00673362	CA-CN
P2ry13	322.337	1.41456	0.257275	-5.49825	3.83571e-08	5.25882e-06	CA-CN
Spink2	67.8427	1.39159	0.590065	-2.35836	0.0183557	0.162628	CA-CN
Mt1	94.7919	1.38639	0.503143	-2.75546	0.00586091	0.0807898	CA-CN
Tgm1	262.296	1.38264	0.299202	-4.62107	3.81765e-06	0.00026869	CA-CN
Serpina3g	705.941	1.36646	0.250899	-5.44627	5.14385e-08	6.82108e-06	CA-CN
Serpina3f	171.068	1.35032	0.395295	-3.41599	0.00063551	0.016709	CA-CN
Csf2rb2	3389.33	1.27226	0.134284	-9.4744	2.68298e-21	3.61711e-18	CA-CN
C1rl	613.608	1.27106	0.221979	-5.72601	1.0282e-08	1.56927e-06	CA-CN
Prtn3	725.341	1.26975	0.229699	-5.52789	3.24112e-08	4.52024e-06	CA-CN
Sema6b	448.278	1.26347	0.258436	-4.88892	1.01392e-06	8.91476e-05	CA-CN
Gm15350	76.4144	1.24133	0.578509	-2.14573	0.0318943	0.222962	CA-CN
Il4ra	4291.2	1.20698	0.126289	-9.55731	1.20858e-21	1.95524e-18	CA-CN
Atp11a	2959.15	1.19538	0.150669	-7.93377	2.12591e-15	1.07478e-12	CA-CN
Ift27	123.671	1.16982	0.39592	-2.95467	0.00312999	0.0533021	CA-CN
Fam217b	294.592	1.14224	0.262469	-4.35192	1.34953e-05	0.000768755	CA-CN
0610040J01Rik	357.669	1.11401	0.242841	-4.58739	4.48832e-06	0.000310308	CA-CN
Jak3	1679.54	1.09892	0.150695	-7.29236	3.04578e-13	1.00928e-10	CA-CN
Flot2	2590.27	1.07738	0.147913	-7.28386	3.24406e-13	1.00928e-10	CA-CN
Ccdc86	339.838	1.06693	0.242373	-4.40202	1.0725e-05	0.000633242	CA-CN
Chil3	41217.2	1.05852	0.667407	-1.58602	0.112734	0.439397	CA-CN
Ipcef1	673.111	1.05291	0.195143	-5.39557	6.83046e-08	8.63306e-06	CA-CN
Cd24a	211.322	1.05272	0.355605	-2.96036	0.00307281	0.052661	CA-CN
Id3	287.143	1.04768	0.271419	-3.86	0.000113386	0.00441509	CA-CN
Chil1	4225	1.04687	0.148569	-7.04636	1.83664e-12	5.30593e-10	CA-CN
Shtn1	980.02	1.04515	0.247966	-4.21489	2.49902e-05	0.00131264	CA-CN
Cdk20	217.433	1.041	0.291211	-3.57473	0.000350591	0.0102253	CA-CN
Tmem268	2430.17	1.03744	0.139696	-7.42641	1.11585e-13	4.75059e-11	CA-CN
F10	5184.73	1.03073	0.371837	-2.77199	0.00557154	0.0783795	CA-CN
Ctdspl	1339.34	1.02356	0.193543	-5.28856	1.23285e-07	1.44529e-05	CA-CN
Abi3	5853.49	1.02322	0.138696	-7.37742	1.61388e-13	6.09687e-11	CA-CN
Sfxn5	546.697	1.01081	0.209472	-4.82549	1.39658e-06	0.000114111	CA-CN
Rpl30	68.091	1.00902	0.605535	-1.66632	0.0956494	0.40572	CA-CN
Gm36738	63.5172	0.971242	0.709042	-1.36979	0.170751	0.5387	CA-CN
Galnt6	739.06	0.967199	0.572857	-1.68838	0.091339	0.395716	CA-CN
Cyfip2	1597.77	0.966782	0.150542	-6.42202	1.34481e-10	2.94005e-08	CA-CN
Gm15545	114.285	0.96319	0.3991	-2.4134	0.0158044	0.148308	CA-CN
Gpr15	182.354	0.962429	0.333094	-2.88936	0.00386026	0.0613464	CA-CN
Gpr146	1560.27	0.960935	0.194783	-4.93336	8.08252e-07	7.26439e-05	CA-CN
Slc12a7	518.025	0.956819	0.206023	-4.64423	3.41354e-06	0.000246537	CA-CN
Nlrx1	1187.83	0.954319	0.163578	-5.83403	5.41031e-09	8.7528e-07	CA-CN
Paqr3	561.772	0.95138	0.21677	-4.3889	1.13926e-05	0.000667788	CA-CN
Tsfm	192.887	0.950926	0.349758	-2.71881	0.00655173	0.086455	CA-CN
Camk2d	3506.09	0.943241	0.165416	-5.70222	1.18256e-08	1.73923e-06	CA-CN
Nrbf2	248.378	0.920888	0.298139	-3.08878	0.00200979	0.0386156	CA-CN
Cd81	159.168	0.917845	0.406011	-2.26064	0.0237816	0.18713	CA-CN
Cd274	389.658	0.916491	0.228563	-4.00979	6.07723e-05	0.00282521	CA-CN
Fam234b	1581.28	0.915126	0.148607	-6.15804	7.36528e-10	1.32395e-07	CA-CN
Nxpe5	321.056	0.914942	0.271998	-3.36378	0.000768827	0.0189213	CA-CN
Aig1	188.192	0.914066	0.305605	-2.991	0.00278066	0.0482678	CA-CN
2810025M15Rik	360.956	0.905313	0.233508	-3.877	0.00010575	0.0041932	CA-CN
Cd200r1	271.723	0.902321	0.279794	-3.22495	0.00125994	0.0277702	CA-CN
Cd2	270.883	0.902277	0.897165	-1.0057	0.314561	0.677445	CA-CN
Bcl3	3457.5	0.899775	0.14508	-6.20191	5.57824e-10	1.02551e-07	CA-CN
Dgat2	535.955	0.892697	0.619007	-1.44214	0.149262	0.506452	CA-CN
Csf2rb	14876.9	0.890937	0.116838	-7.62539	2.43299e-14	1.09336e-11	CA-CN
Mecr	144.012	0.889941	0.360761	-2.46685	0.0136309	0.137998	CA-CN
Sbno2	9829.22	0.88648	0.127788	-6.93712	4.0017e-12	1.07899e-09	CA-CN
Cttnbp2nl	381.612	0.885325	0.251408	-3.52147	0.000429157	0.012012	CA-CN
Gstp1	245.607	0.866937	0.294617	-2.94259	0.00325479	0.0546425	CA-CN
Ptgr1	547.803	0.866411	0.245368	-3.53108	0.000413873	0.011644	CA-CN
Nfil3	1885.38	0.850482	0.156328	-5.44037	5.31689e-08	6.93683e-06	CA-CN
Hebp1	2547.02	0.847234	0.155899	-5.4345	5.49495e-08	7.05534e-06	CA-CN
Hp	15566.6	0.84521	0.122921	-6.87607	6.15268e-12	1.60545e-09	CA-CN
Gaa	990.441	0.841471	0.172848	-4.86828	1.12574e-06	9.68738e-05	CA-CN
Mrpl52	802.763	0.840959	0.187587	-4.48304	7.35863e-06	0.000466321	CA-CN
Flot1	1954.49	0.838024	0.144276	-5.80849	6.30389e-09	9.99846e-07	CA-CN
1600014C10Rik	3511.52	0.837593	0.134604	-6.22264	4.88864e-10	9.64492e-08	CA-CN
Slc22a4	310.254	0.836412	0.273085	-3.06283	0.00219255	0.0411497	CA-CN
Fam216a	84.9544	0.827386	0.451537	-1.83237	0.0668956	0.333612	CA-CN
Bcl2l1	389.59	0.826078	0.247965	-3.33143	0.000864025	0.0210515	CA-CN
Bmf	2082.5	0.825511	0.182105	-4.53315	5.81103e-06	0.000376431	CA-CN
Rem1	485.592	0.825015	0.265777	-3.10416	0.0019082	0.0373152	CA-CN
Snu13	240.386	0.823254	0.393244	-2.09349	0.0363053	0.237976	CA-CN
Ms4a4a	1049.66	0.821354	0.189868	-4.32593	1.51893e-05	0.000859202	CA-CN
Slc2a8	229.707	0.818756	0.338992	-2.41527	0.0157237	0.147894	CA-CN
Cpne2	244.631	0.812264	0.324323	-2.50449	0.0122629	0.128991	CA-CN
Tfec	627.32	0.798465	0.227751	-3.50587	0.000455119	0.0126077	CA-CN
Mcm4	584.839	0.796041	0.198255	-4.01525	5.93839e-05	0.00278599	CA-CN
Emilin1	1688.72	0.795672	0.155531	-5.11583	3.12364e-07	3.28145e-05	CA-CN
Gatsl2	584.425	0.792271	0.19983	-3.96473	7.3478e-05	0.00321761	CA-CN
Slc28a2	684.744	0.790954	0.209828	-3.76955	0.000163545	0.00585361	CA-CN
Cyp4f18	1037.72	0.787246	0.198853	-3.95894	7.52825e-05	0.00325647	CA-CN
Eps8	405.193	0.785135	0.24289	-3.23248	0.00122721	0.0273423	CA-CN
Ptpn1	15594.1	0.783003	0.125259	-6.25107	4.07657e-10	8.45523e-08	CA-CN
Romo1	255.757	0.7794	0.290648	-2.6816	0.00732716	0.0929151	CA-CN
Sgsh	1792.58	0.773216	0.153766	-5.02851	4.94293e-07	4.75992e-05	CA-CN
Fam110a	316.112	0.772226	0.249243	-3.09829	0.0019464	0.0377565	CA-CN
4930539J05Rik	124.052	0.771594	0.447771	-1.72319	0.0848547	0.381861	CA-CN
Hint2	165.575	0.769195	0.356745	-2.15615	0.0310721	0.21913	CA-CN
Dhx38	2218.68	0.765561	0.144154	-5.31072	1.09193e-07	1.3183e-05	CA-CN
Cfh	3774.16	0.764566	0.129652	-5.89705	3.70055e-09	6.36889e-07	CA-CN
P2ry12	387.41	0.760733	0.22903	-3.32154	0.000895226	0.021552	CA-CN
Dnaaf5	344.033	0.757174	0.3297	-2.29655	0.0216443	0.177386	CA-CN
Ripor2	1880.8	0.751704	0.17543	-4.28491	1.82814e-05	0.00101985	CA-CN
Tubg1	186.684	0.750921	0.30843	-2.43466	0.0149059	0.143711	CA-CN
Gab1	563.637	0.750362	0.209111	-3.58834	0.000332784	0.00989666	CA-CN
Ifitm1	544.303	0.748967	0.606944	-1.234	0.217204	0.596038	CA-CN
Nudt9	352.272	0.742986	0.270577	-2.74593	0.00603396	0.0823081	CA-CN
Cd40	1036.09	0.739221	0.200266	-3.69119	0.000223208	0.00734396	CA-CN
Znhit3	100.688	0.73056	0.405198	-1.80297	0.0713933	0.346431	CA-CN
Ppil1	156.973	0.728321	0.337474	-2.15816	0.0309158	0.21866	CA-CN
Coasy	495.022	0.722193	0.252966	-2.8549	0.00430505	0.0668399	CA-CN
Trem2	1268.93	0.721521	0.173503	-4.15854	3.2029e-05	0.00163976	CA-CN
Kremen1	882.419	0.721337	0.191876	-3.75939	0.000170329	0.00596447	CA-CN
Eif2b2	1095.19	0.7213	0.162691	-4.43354	9.26968e-06	0.000563778	CA-CN
Scarb1	8241.44	0.720553	0.133883	-5.38195	7.36826e-08	9.03058e-06	CA-CN
Trappc9	664.255	0.719762	0.200664	-3.5869	0.000334637	0.0099153	CA-CN
Ctnnd1	3644.62	0.719474	0.136792	-5.25963	1.44342e-07	1.66798e-05	CA-CN
Slc27a1	327.09	0.718289	0.256347	-2.80202	0.00507838	0.0731488	CA-CN
Nudt22	287.327	0.714501	0.276313	-2.58584	0.00971421	0.11083	CA-CN
Cd300lf	1997.26	0.711782	0.145427	-4.89441	9.85994e-07	8.76451e-05	CA-CN
Lrrc8b	2727.53	0.71083	0.140516	-5.05871	4.22108e-07	4.21535e-05	CA-CN
Cux1	2514.76	0.703213	0.158724	-4.43042	9.40515e-06	0.000567748	CA-CN
Wdr7	991.834	0.701172	0.196181	-3.57411	0.000351418	0.0102253	CA-CN
Trappc12	675.262	0.70059	0.211262	-3.31621	0.000912479	0.0219022	CA-CN
Haghl	389.756	0.699876	0.272731	-2.56617	0.0102827	0.115035	CA-CN
Bhlhe40	705.772	0.69594	0.225833	-3.08166	0.00205851	0.0391796	CA-CN
Mex3d	338.404	0.694182	0.255498	-2.71697	0.00658819	0.0866535	CA-CN
Card14	441.586	0.693815	0.217095	-3.1959	0.00139393	0.0298204	CA-CN
Gm5424	272.117	0.68997	0.260608	-2.64754	0.00810799	0.0982556	CA-CN
Ly6i	550.656	0.689134	0.276906	-2.48869	0.0128215	0.133307	CA-CN
Abhd8	326.015	0.688778	0.242044	-2.84567	0.00443175	0.0681529	CA-CN
Rest	1449.4	0.688192	0.16691	-4.12314	3.73744e-05	0.00185474	CA-CN
Med9	393.097	0.687648	0.252358	-2.72489	0.00643227	0.0857177	CA-CN
Rbm19	428.692	0.687516	0.258762	-2.65695	0.00788522	0.0969111	CA-CN
Cyp39a1	631.307	0.68211	0.215917	-3.15913	0.00158239	0.0329895	CA-CN
Mpst	383.856	0.679834	0.240105	-2.8314	0.00463447	0.0703345	CA-CN
Tspan32	348.692	0.679523	0.292629	-2.32213	0.020226	0.170781	CA-CN
Ier3	210.793	0.679435	0.40711	-1.66892	0.0951323	0.404587	CA-CN
Cbr4	129.884	0.67817	0.360274	-1.88237	0.0597853	0.313532	CA-CN
H2-Oa	132.047	0.67785	0.362335	-1.87078	0.061375	0.318963	CA-CN
Xxylt1	629.8	0.677666	0.191826	-3.5327	0.000411333	0.0116338	CA-CN
B4galt6	997.952	0.676919	0.200118	-3.38259	0.000718049	0.0181509	CA-CN
Fbxl8	210.457	0.676024	0.300312	-2.25107	0.0243812	0.190183	CA-CN
B9d2	872.687	0.675288	0.18414	-3.66724	0.000245179	0.00787007	CA-CN
Tgfbi	34741.2	0.671471	0.111189	-6.03903	1.55044e-09	2.72642e-07	CA-CN
Arhgap26	7466.96	0.667154	0.118681	-5.62139	1.89429e-08	2.73623e-06	CA-CN
Agtrap	1423.34	0.661194	0.15976	-4.13868	3.49306e-05	0.00175499	CA-CN
Tmem131	6077.38	0.661158	0.1249	-5.2935	1.2e-07	1.42747e-05	CA-CN
BC002163	308.476	0.660649	0.2652	-2.49113	0.0127337	0.132736	CA-CN
Fam220a	312.536	0.658882	0.247477	-2.6624	0.00775866	0.095963	CA-CN
Kif9	350.729	0.655741	0.298286	-2.19836	0.0279235	0.205412	CA-CN
Lrp1	28819.6	0.65508	0.113801	-5.75637	8.59409e-09	1.33688e-06	CA-CN
Acp5	1201.78	0.653006	0.157153	-4.15523	3.24964e-05	0.00165323	CA-CN
Osgin1	219.083	0.651873	0.32997	-1.97555	0.0482058	0.281336	CA-CN
Bpgm	317.413	0.651737	0.262021	-2.48735	0.0128701	0.13364	CA-CN
Ass1	282.264	0.651669	0.258021	-2.52564	0.0115488	0.124226	CA-CN
E330009J07Rik	789.658	0.650923	0.210665	-3.08985	0.0020026	0.0385692	CA-CN
Pag1	2001.08	0.649857	0.157696	-4.12095	3.77306e-05	0.00186099	CA-CN
Vti1a	868.065	0.648676	0.196175	-3.30661	0.000944311	0.0223349	CA-CN
Lrrc20	327.284	0.646535	0.27166	-2.37994	0.0173155	0.156416	CA-CN
Zfp36l1	1223.73	0.64401	0.204383	-3.15099	0.00162715	0.0335767	CA-CN
Gyg	4656.49	0.642772	0.133669	-4.80867	1.51936e-06	0.000121684	CA-CN
Gm27021	111.529	0.642494	0.475288	-1.3518	0.176439	0.545746	CA-CN
Ddi2	4241.57	0.641619	0.129362	-4.95987	7.05406e-07	6.41127e-05	CA-CN
Zcwpw1	245.233	0.641259	0.275948	-2.32385	0.0201338	0.170691	CA-CN
Sys1	1476.48	0.641135	0.164179	-3.9051	9.41878e-05	0.0038479	CA-CN
Riox1	536.769	0.640015	0.221023	-2.8957	0.00378313	0.0606946	CA-CN
Bckdha	2046.92	0.638214	0.137582	-4.63879	3.50447e-06	0.000250864	CA-CN
Nectin4	496.835	0.637062	0.211059	-3.01841	0.00254105	0.0456487	CA-CN
Pdk2	360.579	0.636999	0.257767	-2.47122	0.0134653	0.13718	CA-CN
Cfb	873.376	0.631207	0.262682	-2.40293	0.0162641	0.151002	CA-CN
Ampd3	3749.63	0.630462	0.132376	-4.76267	1.91043e-06	0.000150034	CA-CN
Tmem110	867.453	0.626873	0.191389	-3.2754	0.00105514	0.0243858	CA-CN
H6pd	2423.02	0.625565	0.157182	-3.97989	6.89484e-05	0.00307788	CA-CN
Ttc38	500.946	0.62545	0.207266	-3.01762	0.00254769	0.0456487	CA-CN
Cep164	573.486	0.62541	0.202559	-3.08755	0.00201817	0.0386847	CA-CN
Nudt14	278.386	0.625326	0.290124	-2.15537	0.0311327	0.219366	CA-CN
Ddt	293.396	0.625306	0.252188	-2.47952	0.0131558	0.136084	CA-CN
Acaa1a	1746.78	0.625189	0.141839	-4.40775	1.04451e-05	0.000621251	CA-CN
Prr5l	1527.91	0.624974	0.19058	-3.27934	0.00104052	0.0242986	CA-CN
Retreg1	375.356	0.624209	0.281272	-2.21923	0.0264708	0.199183	CA-CN
Gypc	852.68	0.620691	0.172872	-3.59046	0.00033009	0.0098834	CA-CN
Cpd	1553.65	0.615446	0.17513	-3.51423	0.000441038	0.0122596	CA-CN
Cd302	2793	0.615202	0.134769	-4.56487	4.998e-06	0.000336907	CA-CN
Mfsd13a	301.98	0.613652	0.256089	-2.39625	0.0165638	0.152436	CA-CN
Slc37a1	356.814	0.613085	0.236498	-2.59235	0.00953231	0.109995	CA-CN
Coro2a	1313.49	0.612247	0.190008	-3.22223	0.00127199	0.0279596	CA-CN
2500002B13Rik	89.3895	0.611967	0.474922	-1.28856	0.197549	0.572137	CA-CN
Irf2bpl	1525.74	0.611753	0.194264	-3.14908	0.00163785	0.0336417	CA-CN
Serinc5	1382.09	0.61139	0.160806	-3.80204	0.000143512	0.00527667	CA-CN
Fnip2	1033.44	0.610499	0.166021	-3.67724	0.000235771	0.00765925	CA-CN
Susd6	5241.95	0.609332	0.14335	-4.25067	2.13134e-05	0.00115707	CA-CN
Mgst3	264.46	0.606962	0.279848	-2.1689	0.0300904	0.2154	CA-CN
Aatk	698.916	0.605987	0.191611	-3.16259	0.0015637	0.0326841	CA-CN
Psen2	807.166	0.602858	0.228707	-2.63595	0.00839033	0.0997496	CA-CN
Arid5a	2481.69	0.602565	0.132227	-4.55706	5.18752e-06	0.00034395	CA-CN
Parvg	1185.76	0.60129	0.16918	-3.55414	0.000379212	0.010839	CA-CN
Maml3	841.677	0.601001	0.239363	-2.51084	0.0120446	0.127692	CA-CN
Ntng2	1771.77	0.599885	0.177725	-3.37535	0.00073722	0.0184625	CA-CN
Dnajb12	924.736	0.592636	0.17117	-3.46226	0.000535651	0.0144913	CA-CN
Psmb5	424.912	0.592436	0.220403	-2.68797	0.00718875	0.092155	CA-CN
Gm15471	178.221	0.592423	0.337984	-1.75282	0.0796336	0.369992	CA-CN
Cds2	4559.8	0.591058	0.151592	-3.89902	9.65847e-05	0.003926	CA-CN
Pithd1	569.229	0.588911	0.195189	-3.01713	0.00255182	0.0456487	CA-CN
Lmo1	185.938	0.585022	0.31387	-1.8639	0.0623362	0.320966	CA-CN
Mif4gd	668.974	0.582764	0.191856	-3.03751	0.00238545	0.0437549	CA-CN
Aar2	439.495	0.582547	0.221049	-2.63538	0.00840431	0.0997496	CA-CN
Itgb5	1848.83	0.580905	0.141351	-4.10966	3.96234e-05	0.00193081	CA-CN
6530402F18Rik	2248.22	0.580569	0.147697	-3.93081	8.46591e-05	0.00351183	CA-CN
Rnasel	1021.87	0.580345	0.213397	-2.71955	0.00653704	0.0864021	CA-CN
Adck2	540.772	0.57833	0.203963	-2.83546	0.00457597	0.0697081	CA-CN
Pld1	763.558	0.575598	0.194807	-2.9547	0.0031297	0.0533021	CA-CN
Pik3cb	1112.56	0.575393	0.182347	-3.15548	0.00160232	0.0333191	CA-CN
Pnkd	90.3394	0.572772	0.439749	-1.3025	0.192746	0.565926	CA-CN
Tspo	4995.32	0.572605	0.121494	-4.71304	2.44044e-06	0.000184493	CA-CN
2410015M20Rik	502.184	0.570502	0.244167	-2.33652	0.0194643	0.168033	CA-CN
Acbd4	287.587	0.570114	0.253513	-2.24886	0.0245216	0.190667	CA-CN
Rsc1a1	2831.53	0.569617	0.142349	-4.00155	6.29301e-05	0.00289228	CA-CN
Rcor1	561.433	0.568805	0.200584	-2.83574	0.00457198	0.0697081	CA-CN
Casp6	967.193	0.568803	0.18357	-3.09857	0.00194459	0.0377565	CA-CN
Jaml	2886.12	0.56872	0.149077	-3.81493	0.00013622	0.00510558	CA-CN
Pdk3	1129.57	0.566867	0.168534	-3.36351	0.000769577	0.0189213	CA-CN
Bmx	769.168	0.565688	0.207864	-2.72143	0.00650001	0.0861943	CA-CN
C3	21753.8	0.564365	0.112575	-5.01326	5.35158e-07	4.97574e-05	CA-CN
Def8	914.533	0.564024	0.183296	-3.07712	0.00209013	0.0396273	CA-CN
Mxd1	1033.45	0.563293	0.177429	-3.17475	0.00149963	0.031611	CA-CN
Ikbke	2382.6	0.562984	0.162234	-3.47019	0.000520087	0.0141174	CA-CN
Abcb8	373.466	0.562253	0.257201	-2.18605	0.0288122	0.209212	CA-CN
Pik3r2	1149.03	0.560847	0.162955	-3.44173	0.000578	0.0153797	CA-CN
Gngt2	3243.5	0.560798	0.131663	-4.25933	2.05038e-05	0.00112827	CA-CN
Dpcd	283.041	0.560247	0.261929	-2.13893	0.0324416	0.22506	CA-CN
Pvr	576.835	0.559312	0.227673	-2.45665	0.014024	0.139533	CA-CN
Avpi1	183.853	0.558462	0.310829	-1.79668	0.0723858	0.348529	CA-CN
Hibch	369.063	0.558126	0.230554	-2.42081	0.0154861	0.1472	CA-CN
Fam98b	471.933	0.556883	0.209867	-2.65351	0.00796596	0.0969111	CA-CN
Spata13	2336.63	0.556638	0.159466	-3.49064	0.000481861	0.0132577	CA-CN
Tram2	312.442	0.556242	0.251547	-2.21128	0.0270162	0.201519	CA-CN
Clcn7	1808.61	0.556129	0.157273	-3.53608	0.000406108	0.0115263	CA-CN
Rab11fip5	1016.4	0.555967	0.182632	-3.0442	0.00233303	0.0430865	CA-CN
1700021F05Rik	189.541	0.555845	0.320052	-1.73673	0.0824347	0.377371	CA-CN
C2cd2l	986.588	0.55497	0.17336	-3.20125	0.00136831	0.0294368	CA-CN
Adk	405.031	0.553066	0.242667	-2.27912	0.0226602	0.181844	CA-CN
Rbl2	1648.09	0.55135	0.147041	-3.74964	0.000177092	0.00609573	CA-CN
Treml2	739.098	0.550021	0.194736	-2.82445	0.00473624	0.0710682	CA-CN
Rft1	450.44	0.548126	0.226855	-2.41619	0.0156838	0.147863	CA-CN
Ppt1	9423.07	0.547816	0.117945	-4.64468	3.406e-06	0.000246537	CA-CN
Rab36	1056.18	0.547256	0.221946	-2.46572	0.013674	0.138261	CA-CN
Hddc2	223.208	0.546784	0.295087	-1.85296	0.0638884	0.324255	CA-CN
Leng9	335.564	0.546344	0.280637	-1.9468	0.0515586	0.291413	CA-CN
Nod1	2046.48	0.546033	0.162142	-3.36762	0.000758205	0.0188132	CA-CN
Trem3	824.86	0.545893	0.182174	-2.99654	0.00273062	0.0477062	CA-CN
Relb	1438.29	0.543637	0.156492	-3.4739	0.000512957	0.0139707	CA-CN
Sirt3	421.225	0.543347	0.23644	-2.29803	0.02156	0.177055	CA-CN
2310022B05Rik	459.486	0.543262	0.233436	-2.32725	0.0199521	0.170066	CA-CN
Mctp2	694.849	0.543198	0.202875	-2.6775	0.00741738	0.0938943	CA-CN
1110008P14Rik	544.265	0.542317	0.252097	-2.15122	0.0314586	0.220559	CA-CN
Ern1	3260.4	0.54194	0.134166	-4.03932	5.36066e-05	0.00256582	CA-CN
Ttyh3	6220.95	0.540446	0.171329	-3.15444	0.00160806	0.0333529	CA-CN
Smpdl3b	1357.02	0.540173	0.191637	-2.81873	0.00482137	0.0718233	CA-CN
Zdhhc1	263.915	0.538666	0.266045	-2.02472	0.0428963	0.263469	CA-CN
Cenpo	291.301	0.538599	0.273868	-1.96664	0.049225	0.284415	CA-CN
Npc1	2096.66	0.537806	0.146032	-3.6828	0.000230682	0.00752415	CA-CN
Fam189b	492.176	0.536501	0.217312	-2.46881	0.0135565	0.137589	CA-CN
C5ar2	492.203	0.536094	0.258503	-2.07384	0.0380945	0.244707	CA-CN
Tbrg1	556.24	0.536082	0.199815	-2.6829	0.00729875	0.0928295	CA-CN
Galns	1219.05	0.535555	0.155152	-3.45182	0.000556827	0.0150139	CA-CN
Atmin	1480.85	0.535383	0.157848	-3.39176	0.000694455	0.0177767	CA-CN
Serpinb1a	497.449	0.532397	0.244735	-2.1754	0.0296	0.21302	CA-CN
Rbm47	1252.2	0.530995	0.176538	-3.00783	0.00263122	0.0464714	CA-CN
Sorl1	11670.6	0.529889	0.113759	-4.65799	3.19307e-06	0.000234807	CA-CN
Tmem176a	3254.74	0.529628	0.136486	-3.88047	0.000104256	0.00415431	CA-CN
Ss18l2	123.812	0.529018	0.424425	-1.24644	0.212604	0.590981	CA-CN
Nsun3	153.328	0.528803	0.375689	-1.40755	0.159263	0.522841	CA-CN
Tmem88	179.783	0.526267	0.347715	-1.5135	0.130152	0.473595	CA-CN
Fzd7	474.659	0.525997	0.256197	-2.0531	0.0400631	0.252599	CA-CN
Sdhaf1	355.543	0.525634	0.28306	-1.85697	0.0633154	0.322932	CA-CN
Acvr1b	2146.19	0.52465	0.138108	-3.79884	0.000145373	0.00532092	CA-CN
Pcnx	2620.15	0.523989	0.132675	-3.9494	7.83458e-05	0.0033525	CA-CN
Zc3h12d	2118.91	0.521485	0.156793	-3.32593	0.000881225	0.0213152	CA-CN
1810011H11Rik	191.589	0.519354	0.311155	-1.66912	0.0950942	0.404587	CA-CN
Ptk2b	4873.96	0.519009	0.140228	-3.70119	0.00021459	0.00723259	CA-CN
Ift57	407.214	0.518081	0.241313	-2.14693	0.0317991	0.222511	CA-CN
Dnajc30	406.739	0.516811	0.254044	-2.03434	0.0419174	0.260623	CA-CN
Fry	1153.42	0.516254	0.165152	-3.12594	0.00177236	0.0353992	CA-CN
Gpld1	799.093	0.515672	0.212296	-2.42902	0.0151398	0.14561	CA-CN
Tle3	4839.05	0.514736	0.152765	-3.36947	0.000753139	0.018745	CA-CN
Ttc7	9277.6	0.51449	0.12816	-4.01445	5.95841e-05	0.00278599	CA-CN
Hoxb4	552.083	0.513801	0.207379	-2.4776	0.0132271	0.136298	CA-CN
Zfp524	602.362	0.513585	0.192665	-2.66569	0.00768301	0.0956121	CA-CN
Ndst1	2942.81	0.513569	0.136831	-3.75331	0.000174511	0.00608458	CA-CN
2010320M18Rik	151.811	0.512808	0.33438	-1.53361	0.125126	0.462913	CA-CN
Fam213b	110.356	0.512518	0.438825	-1.16793	0.242834	0.619817	CA-CN
Immp1l	100.479	0.512079	0.41199	-1.24294	0.21389	0.592556	CA-CN
Kctd17	390.999	0.510541	0.239575	-2.13103	0.033087	0.227973	CA-CN
Spen	3378.49	0.50916	0.128541	-3.96106	7.46168e-05	0.00324503	CA-CN
Steap3	689.195	0.508443	0.196791	-2.58367	0.00977549	0.111318	CA-CN
Nit2	309.782	0.508398	0.256723	-1.98034	0.0476657	0.281131	CA-CN
Gk	610	0.507096	0.190931	-2.6559	0.00790962	0.0969111	CA-CN
Mink1	3925.92	0.506822	0.127379	-3.97884	6.92514e-05	0.00307788	CA-CN
Tmem164	4619.48	0.506341	0.126971	-3.98786	6.6672e-05	0.00302983	CA-CN
Ccar2	899.134	0.505993	0.179605	-2.81725	0.00484366	0.071882	CA-CN
Trim13	322.767	0.50534	0.342075	-1.47728	0.139601	0.488847	CA-CN
Cyth3	861.422	0.504044	0.221228	-2.27839	0.0227035	0.18201	CA-CN
2310061I04Rik	316.262	0.503924	0.270122	-1.86554	0.0621058	0.320596	CA-CN
Noa1	497.595	0.503544	0.211289	-2.3832	0.0171626	0.156063	CA-CN
Foxo3	1161.28	0.503321	0.174732	-2.88054	0.00396992	0.0621135	CA-CN
Gabarapl2	190.661	0.503095	0.306215	-1.64295	0.100394	0.413476	CA-CN
Plgrkt	630.071	0.50291	0.198691	-2.53111	0.0113702	0.123012	CA-CN
Cdkn2d	1486.08	0.502901	0.1668	-3.015	0.00256983	0.0456487	CA-CN
Mrto4	184.918	0.502777	0.316041	-1.59086	0.111641	0.43835	CA-CN
N4bp1	5449.84	0.502772	0.134068	-3.75012	0.000176751	0.00609573	CA-CN
Nrg1	329.056	0.50202	0.274419	-1.82939	0.0673408	0.335418	CA-CN
Slc44a2	11636.5	0.501951	0.13417	-3.74115	0.000183178	0.0062785	CA-CN
Bin2	10416.5	0.50134	0.11448	-4.37927	1.19075e-05	0.000688	CA-CN
Acsf3	255.177	0.500669	0.302023	-1.65772	0.0973742	0.408881	CA-CN
C1qtnf6	420.513	0.499709	0.236614	-2.11192	0.0346935	0.23363	CA-CN
Trem1	1420.84	0.499641	0.214211	-2.33248	0.0196757	0.168956	CA-CN
Pim1	3558.98	0.49931	0.192769	-2.5902	0.00959198	0.110027	CA-CN
Naaa	6966.6	0.499159	0.120415	-4.14533	3.3932e-05	0.00171548	CA-CN
1700034P13Rik	299.47	0.49854	0.269072	-1.85281	0.0639093	0.324255	CA-CN
Wfdc17	3660.07	0.497712	0.127382	-3.90724	9.33549e-05	0.00383324	CA-CN
Ttc7b	440.778	0.497659	0.218281	-2.2799	0.0226134	0.181648	CA-CN
Il1rn	654.324	0.495916	0.204548	-2.42445	0.0153315	0.146246	CA-CN
Fgr	20214.5	0.494437	0.120853	-4.09124	4.29082e-05	0.00207835	CA-CN
Wdr70	244.337	0.494374	0.29086	-1.6997	0.0891882	0.391799	CA-CN
Med30	382.518	0.493816	0.22778	-2.16796	0.0301619	0.21572	CA-CN
Wfdc18	47.1081	0.493793	0.599065	-0.824274	0.409784	0.748925	CA-CN
Zscan25	232.171	0.493714	0.278194	-1.77471	0.0759457	0.35952	CA-CN
Pira6	3271.51	0.493195	0.145115	-3.39866	0.000677168	0.0175004	CA-CN
Gatm	4504.68	0.491206	0.127266	-3.85969	0.000113529	0.00441509	CA-CN
Prkcb	5972.59	0.490693	0.122568	-4.00343	6.24308e-05	0.00288573	CA-CN
Tcf19	202.021	0.490499	0.317671	-1.54405	0.122576	0.459462	CA-CN
Slc25a30	536.96	0.490275	0.213817	-2.29297	0.0218499	0.177823	CA-CN
Pld2	693.155	0.488794	0.191844	-2.54787	0.0108383	0.119349	CA-CN
Klc4	486.455	0.488624	0.226278	-2.1594	0.0308189	0.218296	CA-CN
Pik3cd	12064.2	0.487128	0.122343	-3.98167	6.8433e-05	0.0030753	CA-CN
Ndufb9	1248.71	0.486876	0.167351	-2.9093	0.00362236	0.0586026	CA-CN
Rab28	723.299	0.486533	0.201725	-2.41187	0.0158709	0.148416	CA-CN
Lrp10	5250.17	0.486422	0.126785	-3.83657	0.000124763	0.00478267	CA-CN
Spryd3	1043.11	0.485966	0.179914	-2.7011	0.00691098	0.0895879	CA-CN
Sephs2	3067.45	0.485098	0.13648	-3.55435	0.000378914	0.010839	CA-CN
Ift22	230.849	0.48506	0.280567	-1.72885	0.0838355	0.380747	CA-CN
St6gal1	1461.7	0.484716	0.166269	-2.91525	0.00355406	0.0576858	CA-CN
Acvr1	406.136	0.484244	0.245919	-1.96912	0.0489397	0.28378	CA-CN
Atrnl1	3116.3	0.484091	0.128487	-3.76763	0.000164806	0.00587274	CA-CN
Gm12359	152.684	0.48256	0.348357	-1.38524	0.165978	0.53409	CA-CN
Pira7	2977.33	0.482247	0.141186	-3.41569	0.000636218	0.016709	CA-CN
Uqcrc1	3366.47	0.480317	0.145153	-3.30905	0.000936138	0.0222718	CA-CN
Grk6	4966.76	0.479738	0.120233	-3.99007	6.60547e-05	0.00301874	CA-CN
Pira11	3057.77	0.47934	0.141029	-3.39887	0.000676656	0.0175004	CA-CN
Itgax	487.672	0.479299	0.24623	-1.94655	0.051589	0.291413	CA-CN
Ace	8276.54	0.47926	0.174621	-2.74457	0.00605911	0.0823734	CA-CN
Gm14548	3057.47	0.479112	0.141052	-3.39671	0.00068201	0.0175412	CA-CN
Ubac2	2047.44	0.478336	0.147369	-3.24585	0.00117102	0.0263855	CA-CN
Glg1	2688.69	0.477504	0.134096	-3.56091	0.00036957	0.0106766	CA-CN
Ntpcr	528.829	0.477164	0.200112	-2.38448	0.0171032	0.155797	CA-CN
A830035O19Rik	335.614	0.476515	0.24727	-1.92711	0.053966	0.298994	CA-CN
Gda	17497.9	0.476404	0.129686	-3.6735	0.000239247	0.00774107	CA-CN
Tmem198b	830.213	0.475476	0.232716	-2.04316	0.0410369	0.256528	CA-CN
Phyh	1425.67	0.475249	0.149705	-3.17456	0.00150063	0.031611	CA-CN
Tbc1d9b	1858.94	0.474862	0.158684	-2.9925	0.00276707	0.0481952	CA-CN
Gipc1	578.166	0.474585	0.204696	-2.31849	0.0204228	0.171547	CA-CN
Pira4	2961.72	0.473161	0.141477	-3.34445	0.000824472	0.0202095	CA-CN
Adam9	2259.51	0.473067	0.138234	-3.42222	0.000621119	0.0164191	CA-CN
Rmdn3	462.6	0.4724	0.216391	-2.18308	0.0290296	0.210036	CA-CN
Pira1	3121.35	0.472065	0.139677	-3.37969	0.000725675	0.0182866	CA-CN
Naglu	657.308	0.47192	0.202317	-2.33258	0.0196703	0.168956	CA-CN
Coa4	200.424	0.471009	0.301224	-1.56365	0.1179	0.45011	CA-CN
Acyp1	182.75	0.470982	0.339656	-1.38665	0.16555	0.533616	CA-CN
Cnnm4	1114.51	0.470129	0.166649	-2.82108	0.0047862	0.071431	CA-CN
Slc45a4	792.263	0.469422	0.223468	-2.10062	0.0356741	0.236531	CA-CN
Olfm1	4203.06	0.469367	0.127064	-3.69393	0.000220813	0.00733404	CA-CN
Wdr92	379.449	0.468504	0.25689	-1.82375	0.06819	0.337363	CA-CN
Fam84b	706.158	0.46837	0.196851	-2.37931	0.0173452	0.156416	CA-CN
1110012L19Rik	175.22	0.467881	0.325799	-1.4361	0.150973	0.509054	CA-CN
Ints5	604.477	0.467657	0.197991	-2.36201	0.018176	0.16139	CA-CN
Pgm2	432.819	0.467306	0.225557	-2.07178	0.0382858	0.245594	CA-CN
Cd244	3102.1	0.467147	0.194951	-2.39623	0.0165646	0.152436	CA-CN
Aplp2	5768.38	0.466758	0.118221	-3.94819	7.87459e-05	0.0033525	CA-CN
Got2	807.405	0.466058	0.198869	-2.34355	0.0191014	0.165944	CA-CN
Washc3	622.528	0.465495	0.200696	-2.31941	0.0203731	0.171486	CA-CN
E2f2	1666.15	0.463566	0.146379	-3.1669	0.00154075	0.0323717	CA-CN
Etfb	804.111	0.463271	0.173375	-2.67208	0.00753823	0.0943925	CA-CN
Mad1l1	303.676	0.462682	0.26119	-1.77144	0.0764871	0.36055	CA-CN
Pram1	1998.39	0.462173	0.149915	-3.08289	0.00205001	0.0391097	CA-CN
Mospd3	1401.89	0.462012	0.169372	-2.72779	0.00637597	0.0852483	CA-CN
1700020L24Rik	84.8054	0.461746	0.46113	-1.00134	0.316664	0.679803	CA-CN
Pygb	961.468	0.461655	0.169075	-2.73047	0.00632442	0.0849869	CA-CN
Tmem18	654.222	0.461223	0.196161	-2.35125	0.0187105	0.164153	CA-CN
Auh	686.122	0.460831	0.198412	-2.3226	0.0202008	0.170746	CA-CN
Mob3b	1967.98	0.460143	0.142176	-3.23642	0.00121039	0.0271214	CA-CN
Apbb1ip	6558.34	0.45991	0.127818	-3.59817	0.000320465	0.00967253	CA-CN
Man2a1	5321.6	0.459612	0.125985	-3.64815	0.000264137	0.00829183	CA-CN
Tbcel	1461.37	0.459592	0.167302	-2.74708	0.00601287	0.082159	CA-CN
Uchl5	306.212	0.459389	0.24764	-1.85507	0.0635864	0.323287	CA-CN
Siglece	1528.68	0.459376	0.163158	-2.81553	0.00486974	0.071882	CA-CN
Cln6	1375.5	0.458663	0.170499	-2.69013	0.00714252	0.0917077	CA-CN
Vps33a	1619.74	0.458202	0.157946	-2.901	0.00371978	0.0598197	CA-CN
AU040320	894.128	0.457512	0.169151	-2.70476	0.00683529	0.0890349	CA-CN
Mkl1	4066.88	0.457316	0.123462	-3.70411	0.000212135	0.00717976	CA-CN
Ncf4	10772.6	0.456757	0.113188	-4.0354	5.45092e-05	0.00259367	CA-CN
Letm1	1098.22	0.455273	0.186688	-2.43868	0.0147409	0.142684	CA-CN
Dnajb13	220.268	0.454767	0.39851	-1.14117	0.253799	0.626613	CA-CN
Nenf	183.999	0.453778	0.32886	-1.37985	0.167632	0.53577	CA-CN
Pik3r4	773.099	0.453652	0.179492	-2.52742	0.0114903	0.123927	CA-CN
Prkcsh	1451.88	0.452872	0.149673	-3.02575	0.00248017	0.0452869	CA-CN
Bmp2k	1829.33	0.45246	0.150558	-3.00523	0.00265383	0.0467686	CA-CN
Sf3b2	4624.5	0.452047	0.133497	-3.3862	0.000708679	0.0179702	CA-CN
Akr7a5	447.858	0.451731	0.234802	-1.92388	0.054369	0.299585	CA-CN
Megf9	754.62	0.451417	0.224654	-2.00939	0.044496	0.269609	CA-CN
Lair1	1080.28	0.451409	0.172994	-2.60939	0.0090703	0.105568	CA-CN
Afg3l1	881.545	0.450632	0.178048	-2.53096	0.0113751	0.123012	CA-CN
Plcb1	2076.15	0.449831	0.158473	-2.83854	0.00453207	0.0694114	CA-CN
Tiam2	837.332	0.449821	0.174911	-2.57172	0.0101196	0.113849	CA-CN
Fuz	410.402	0.44968	0.219795	-2.0459	0.0407658	0.255228	CA-CN
Pfkl	1023.64	0.449471	0.192885	-2.33025	0.0197929	0.169244	CA-CN
Sema4d	11720.6	0.449461	0.139102	-3.23117	0.00123285	0.0273423	CA-CN
Icam1	4172.91	0.448998	0.123307	-3.6413	0.000271268	0.00847216	CA-CN
Cd93	9513.87	0.448783	0.166654	-2.6929	0.00708343	0.0910936	CA-CN
Mmp19	2238.88	0.448036	0.596518	-0.751086	0.452601	0.773749	CA-CN
Rnf149	6500.04	0.447463	0.129753	-3.44858	0.000563549	0.0151447	CA-CN
Gamt	271.448	0.444735	0.279086	-1.59354	0.111039	0.437881	CA-CN
Uxs1	279.74	0.444613	0.278516	-1.59636	0.110407	0.436798	CA-CN
C130050O18Rik	1403.15	0.444184	0.190021	-2.33756	0.0194103	0.167746	CA-CN
Mapk13	185.869	0.443831	0.319039	-1.39115	0.16418	0.530583	CA-CN
Pbxip1	5576.72	0.442	0.121829	-3.62803	0.000285596	0.00878397	CA-CN
Gnptab	2950.96	0.441967	0.13611	-3.24713	0.00116577	0.0263405	CA-CN
D10Wsu102e	585.983	0.441811	0.194991	-2.26581	0.0234633	0.186073	CA-CN
Ccr1	2398.03	0.441183	0.197498	-2.23386	0.0254923	0.195087	CA-CN
Klf13	18710.4	0.440148	0.129033	-3.41113	0.000646937	0.0169355	CA-CN
Mark4	859.38	0.439814	0.203511	-2.16113	0.0306853	0.217791	CA-CN
Tnfsf14	602.316	0.439784	0.210154	-2.09267	0.0363782	0.237976	CA-CN
Snd1	4376.07	0.439456	0.156063	-2.81589	0.00486427	0.071882	CA-CN
Bricd5	251.166	0.437849	0.274922	-1.59263	0.111243	0.437881	CA-CN
Emilin2	24938.8	0.437421	0.129497	-3.37785	0.000730554	0.0183523	CA-CN
Sort1	6977.64	0.437323	0.131918	-3.3151	0.000916088	0.0219238	CA-CN
Furin	8233.91	0.437161	0.120902	-3.61584	0.000299375	0.00910392	CA-CN
Nudc	370.169	0.436903	0.246342	-1.77356	0.0761359	0.359814	CA-CN
Rab20	111.429	0.4366	0.383219	-1.13929	0.254581	0.626613	CA-CN
4930526I15Rik	218.621	0.436198	0.303121	-1.43903	0.150143	0.507731	CA-CN
Gm11651	399.042	0.436114	0.269708	-1.61698	0.105882	0.430175	CA-CN
Sf3a1	1236.76	0.435903	0.160146	-2.72192	0.00649045	0.0861943	CA-CN
Tmem14c	2491.66	0.434568	0.134501	-3.23096	0.00123376	0.0273423	CA-CN
Spata6	1186.77	0.433735	0.163841	-2.64729	0.00811407	0.0982556	CA-CN
Mtmr9	670.41	0.433649	0.20458	-2.11971	0.0340308	0.231518	CA-CN
Acd	613.78	0.433133	0.192721	-2.24746	0.0246109	0.191053	CA-CN
Rreb1	2149.48	0.430109	0.140658	-3.05784	0.0022294	0.0417444	CA-CN
E130309D02Rik	769.443	0.429884	0.204899	-2.09803	0.0359028	0.237181	CA-CN
Dap	2113.81	0.429865	0.136705	-3.14446	0.00166392	0.033797	CA-CN
Nat9	226.432	0.429653	0.282589	-1.52041	0.128407	0.470845	CA-CN
Sgms2	3822.77	0.429334	0.449938	-0.954208	0.339978	0.699389	CA-CN
Dmxl2	2579.12	0.429118	0.189376	-2.26596	0.0234539	0.186073	CA-CN
Kat14	887.617	0.427187	0.181255	-2.35683	0.0184318	0.162768	CA-CN
Nsf	2681.16	0.426954	0.130247	-3.27803	0.00104536	0.0242986	CA-CN
Pros1	2647.73	0.426829	0.141801	-3.01005	0.00261203	0.0462336	CA-CN
Zfp971	2104.34	0.426805	0.152853	-2.79226	0.00523414	0.0748039	CA-CN
Mrps28	222.307	0.426466	0.305381	-1.3965	0.162563	0.527677	CA-CN
Acox3	4199.15	0.426234	0.135453	-3.14673	0.0016511	0.0336417	CA-CN
Tecpr1	688.482	0.426098	0.190667	-2.23478	0.0254316	0.194906	CA-CN
Rftn1	2835.32	0.425977	0.13771	-3.09329	0.00197952	0.0382155	CA-CN
Edem2	2395.1	0.425968	0.140004	-3.04255	0.00234586	0.043222	CA-CN
Tbc1d2b	5173.1	0.425829	0.119474	-3.5642	0.000364966	0.0105814	CA-CN
Hgf	460.983	0.425397	0.214121	-1.98671	0.0469546	0.27811	CA-CN
Park7	936.14	0.425281	0.220892	-1.92529	0.0541928	0.299226	CA-CN
Mrps34	464.172	0.424857	0.224261	-1.89447	0.0581626	0.309525	CA-CN
Arg2	125.716	0.424771	0.392522	-1.08216	0.279183	0.648568	CA-CN
Snx18	2974.14	0.424329	0.142501	-2.97773	0.00290396	0.0501926	CA-CN
Adi1	228.548	0.424282	0.300604	-1.41143	0.158118	0.52266	CA-CN
3110082I17Rik	984.312	0.424069	0.198182	-2.1398	0.0323709	0.224906	CA-CN
Acadvl	1147.05	0.423478	0.157238	-2.69323	0.00707642	0.0910936	CA-CN
Mfn2	878.804	0.423076	0.178378	-2.37179	0.017702	0.158573	CA-CN
Poll	325.904	0.422844	0.244904	-1.72657	0.0842454	0.381861	CA-CN
Lcp1	33632.5	0.422478	0.110435	-3.82559	0.00013046	0.00493127	CA-CN
Sipa1l3	2103.82	0.42222	0.157332	-2.68362	0.00728292	0.0927741	CA-CN
Rpl17	124.296	0.420577	0.369797	-1.13732	0.255406	0.627719	CA-CN
Ndufb3	685.811	0.42044	0.184129	-2.2834	0.0224068	0.180527	CA-CN
Tmed8	966.864	0.419652	0.17123	-2.45081	0.0142535	0.140263	CA-CN
Lamtor1	1803.06	0.419505	0.152194	-2.75638	0.00584447	0.0807898	CA-CN
Kifc3	1404.12	0.419031	0.153008	-2.73862	0.00616985	0.0835979	CA-CN
Ndufs2	2639.61	0.418511	0.142324	-2.94055	0.00327635	0.0548704	CA-CN
Ppard	1577.49	0.418146	0.182586	-2.29013	0.022014	0.178249	CA-CN
Cbfa2t3	4778.63	0.418072	0.15799	-2.6462	0.00814027	0.0982786	CA-CN
Rhoq	2860.45	0.417967	0.13935	-2.99941	0.00270502	0.0475672	CA-CN
Acad9	654.615	0.417929	0.216999	-1.92595	0.0541109	0.299226	CA-CN
Atp6v1a	5073.66	0.417601	0.130919	-3.18977	0.00142385	0.0303093	CA-CN
Ibtk	1668	0.417544	0.15292	-2.73047	0.00632447	0.0849869	CA-CN
Ccdc88b	2560.6	0.417482	0.143226	-2.91485	0.00355856	0.0576858	CA-CN
Dbi	2044.35	0.416532	0.152807	-2.72586	0.0064134	0.0856072	CA-CN
Alkbh7	138.882	0.416291	0.36049	-1.15479	0.248175	0.62315	CA-CN
Mrps11	391.354	0.415538	0.245577	-1.69209	0.0906289	0.39519	CA-CN
Trio	3599.6	0.415256	0.12995	-3.19552	0.00139581	0.0298204	CA-CN
Endod1	1149.63	0.414843	0.161808	-2.5638	0.0103534	0.115394	CA-CN
Dctn3	758.953	0.414497	0.178298	-2.32474	0.0200859	0.170624	CA-CN
Dis3l2	348.623	0.414402	0.242449	-1.70924	0.087407	0.387842	CA-CN
Plbd2	1916.61	0.413923	0.167488	-2.47136	0.01346	0.13718	CA-CN
Abhd12	2665.91	0.413486	0.131662	-3.14051	0.00168652	0.0341057	CA-CN
Tbc1d22b	496.311	0.413141	0.228566	-1.80753	0.0706792	0.344412	CA-CN
Med11	771.997	0.412829	0.191631	-2.15429	0.0312173	0.219771	CA-CN
Mocos	918.896	0.412793	0.172085	-2.39878	0.0164498	0.151898	CA-CN
Epb41	1287.13	0.412667	0.164239	-2.51261	0.0119843	0.127307	CA-CN
2610301B20Rik	375.423	0.411835	0.228873	-1.79941	0.0719543	0.347901	CA-CN
Myd88	6087.23	0.410954	0.122101	-3.36568	0.000763547	0.0188879	CA-CN
2310022A10Rik	832.633	0.410694	0.189124	-2.17156	0.0298888	0.214151	CA-CN
A230020J21Rik	361.253	0.410579	0.24636	-1.66658	0.095598	0.405715	CA-CN
Rab3d	789.35	0.41005	0.197749	-2.07359	0.0381173	0.244707	CA-CN
Tmem186	371.03	0.409733	0.238514	-1.71785	0.0858232	0.383621	CA-CN
Sppl2b	943.334	0.409578	0.165806	-2.47023	0.0135028	0.137389	CA-CN
Mrps23	843.037	0.409368	0.177589	-2.30514	0.0211586	0.175361	CA-CN
Trappc2	117.625	0.409091	0.42605	-0.960195	0.336957	0.697455	CA-CN
Abhd2	607.087	0.409021	0.192454	-2.12529	0.0335624	0.229878	CA-CN
Cpne3	5199.01	0.408842	0.120606	-3.38989	0.000699217	0.0178174	CA-CN
Atp6v0e2	172.445	0.408753	0.377812	-1.08189	0.279299	0.648651	CA-CN
Aldh3b1	2317.95	0.408718	0.148118	-2.75941	0.00579066	0.0802066	CA-CN
Mboat7	2954.67	0.408337	0.143066	-2.85418	0.00431484	0.0668634	CA-CN
Dctn1	1821.87	0.40752	0.164824	-2.47246	0.0134187	0.13718	CA-CN
Rnf144a	1626.96	0.407429	0.146155	-2.78765	0.00530917	0.0754834	CA-CN
Scarf1	582.846	0.406876	0.236927	-1.7173	0.0859237	0.383621	CA-CN
Cep70	315.075	0.406568	0.242661	-1.67546	0.093845	0.402498	CA-CN
Camk2g	981.463	0.406202	0.16619	-2.4442	0.0145173	0.141824	CA-CN
Gm10684	599.663	0.405986	0.240485	-1.6882	0.0913734	0.395716	CA-CN
Abcc4	1833.31	0.405965	0.158518	-2.56101	0.0104369	0.115967	CA-CN
Gfm2	777.822	0.405872	0.182862	-2.21956	0.0264488	0.199183	CA-CN
Map2k5	629.411	0.405783	0.193939	-2.09232	0.0364096	0.237976	CA-CN
Mboat1	473.567	0.405719	0.254268	-1.59563	0.11057	0.437147	CA-CN
Il3ra	488.943	0.405464	0.236091	-1.71741	0.0859043	0.383621	CA-CN
Dhdds	1860.2	0.405202	0.148959	-2.72022	0.00652388	0.0863693	CA-CN
Il15ra	346.107	0.405095	0.236561	-1.71243	0.086817	0.386071	CA-CN
Slc38a1	4031.71	0.403694	0.132438	-3.04818	0.00230233	0.0426453	CA-CN
Gstk1	135.588	0.403339	0.355643	-1.13411	0.256747	0.629724	CA-CN
Dhrs3	517.814	0.403306	0.20166	-1.99993	0.0455079	0.272677	CA-CN
Fbxo31	528.874	0.403127	0.210854	-1.91188	0.0558917	0.303898	CA-CN
Tlr1	1492.82	0.402332	0.15106	-2.66339	0.0077358	0.0958268	CA-CN
Vcan	20379	0.402113	0.170811	-2.35414	0.0185654	0.163543	CA-CN
Ece1	3411.83	0.401742	0.142658	-2.81613	0.00486065	0.071882	CA-CN
Mtor	1027.08	0.401408	0.162998	-2.46266	0.0137912	0.138408	CA-CN
Psd	508.279	0.400983	0.224349	-1.78732	0.0738864	0.352398	CA-CN
Gtf3c5	413.063	0.400974	0.225301	-1.77973	0.0751207	0.357442	CA-CN
Pdpr	409.626	0.400503	0.229372	-1.74609	0.0807961	0.372876	CA-CN
Mrpl27	199.178	0.400175	0.305401	-1.31033	0.190085	0.564048	CA-CN
Hira	769.524	0.400071	0.177834	-2.24968	0.024469	0.1905	CA-CN
Nagpa	2050.86	0.400004	0.137797	-2.90285	0.00369778	0.0595844	CA-CN
Dock5	2760.55	0.399482	0.141526	-2.82267	0.00476255	0.0712094	CA-CN
Bcas3	600.311	0.399411	0.21722	-1.83874	0.0659537	0.33075	CA-CN
Keap1	1481.3	0.398896	0.163444	-2.44056	0.0146644	0.142572	CA-CN
Bcr	1482.2	0.39868	0.164501	-2.42357	0.0153689	0.14643	CA-CN
Pgls	1672.3	0.398291	0.15151	-2.62881	0.00856836	0.101478	CA-CN
Txnrd1	1271.07	0.398141	0.199449	-1.9962	0.0459117	0.273677	CA-CN
Fam149b	274.832	0.397553	0.276398	-1.43833	0.15034	0.507766	CA-CN
Batf	666.426	0.397308	0.188458	-2.10821	0.0350132	0.234263	CA-CN
Zfp984	541.101	0.397122	0.199908	-1.98652	0.0469754	0.27811	CA-CN
Zfyve26	1545.39	0.396977	0.175166	-2.26629	0.0234335	0.186073	CA-CN
Slc38a10	2558.89	0.396944	0.148958	-2.6648	0.00770334	0.0957179	CA-CN
Ap1b1	2356.96	0.396861	0.137453	-2.88724	0.00388635	0.0613787	CA-CN
Eipr1	378.896	0.396655	0.227832	-1.741	0.0816841	0.37499	CA-CN
Eif4ebp2	2652.1	0.396094	0.176741	-2.2411	0.0250195	0.192745	CA-CN
Abr	7733.77	0.396029	0.122141	-3.24239	0.00118533	0.0266336	CA-CN
Nudt2	166.685	0.395417	0.32749	-1.20742	0.22727	0.605531	CA-CN
Mxi1	1307.7	0.395086	0.158409	-2.49409	0.012628	0.131974	CA-CN
Slc37a2	872.178	0.395062	0.17135	-2.30558	0.0211339	0.175352	CA-CN
Csf1r	41532.6	0.394859	0.113198	-3.48823	0.000486225	0.0133324	CA-CN
Mzt2	169.246	0.394607	0.324649	-1.21549	0.22418	0.602514	CA-CN
Npl	411.477	0.394032	0.229245	-1.71882	0.0856464	0.383607	CA-CN
Tmem38b	2126.21	0.39387	0.136477	-2.88598	0.00390194	0.0614062	CA-CN
Mgat5	412.667	0.393621	0.223459	-1.76149	0.0781553	0.365644	CA-CN
Slpi	4498.18	0.393334	0.141768	-2.7745	0.00552874	0.078227	CA-CN
Nme2	2595	0.392699	0.1468	-2.67505	0.00747172	0.0938943	CA-CN
AI987944	484.811	0.392385	0.211301	-1.85699	0.0633123	0.322932	CA-CN
Them6	264.999	0.39227	0.32708	-1.19931	0.230408	0.608727	CA-CN
Usp30	430.322	0.392165	0.247788	-1.58267	0.113498	0.440334	CA-CN
Gsr	22682.3	0.392149	0.119709	-3.27584	0.00105347	0.0243858	CA-CN
Tomm40l	450.561	0.391583	0.237293	-1.65021	0.0988996	0.411946	CA-CN
Macrod1	157.689	0.391182	0.40481	-0.966335	0.333877	0.694632	CA-CN
Zfp771	213.648	0.39073	0.303102	-1.2891	0.197362	0.572003	CA-CN
Xpa	353.447	0.390685	0.241434	-1.61818	0.105623	0.429341	CA-CN
Zfp46	520.306	0.390287	0.202203	-1.93018	0.053585	0.297903	CA-CN
Asap1	5634.98	0.390088	0.119508	-3.2641	0.00109811	0.0250215	CA-CN
Pde12	526.291	0.39007	0.202646	-1.92488	0.0542444	0.299306	CA-CN
Pctp	303.989	0.389893	0.250534	-1.55625	0.119648	0.453743	CA-CN
Slc25a12	1467.24	0.38972	0.153931	-2.53179	0.0113482	0.123012	CA-CN
Cib2	267.74	0.389403	0.26265	-1.48259	0.138183	0.48689	CA-CN
Gm16731	159.019	0.38935	0.346034	-1.12518	0.260513	0.633178	CA-CN
Clec4e	2924.17	0.389347	0.39397	-0.988265	0.323023	0.684708	CA-CN
Stambpl1	1052.44	0.389281	0.170151	-2.28785	0.0221461	0.178782	CA-CN
Mapkapk2	14059.8	0.38887	0.161197	-2.41238	0.0158485	0.148416	CA-CN
Rusc1	651.567	0.388267	0.201194	-1.92981	0.05363	0.29794	CA-CN
Gsdme	209.451	0.387407	0.319361	-1.21307	0.225103	0.603821	CA-CN
Mfsd10	1133.33	0.387193	0.159872	-2.42189	0.0154401	0.146935	CA-CN
Mta1	924.968	0.386767	0.183458	-2.1082	0.0350135	0.234263	CA-CN
Adap2	621.489	0.386723	0.204349	-1.89246	0.0584297	0.309927	CA-CN
Hfe	2374.74	0.386658	0.148831	-2.59797	0.00937765	0.108365	CA-CN
Arhgap31	830.185	0.386635	0.191086	-2.02336	0.0430358	0.263925	CA-CN
Borcs5	221.177	0.386479	0.284198	-1.3599	0.173863	0.542818	CA-CN
Sem1	3741.06	0.386133	0.135425	-2.85127	0.00435454	0.0673497	CA-CN
Tomm6os	475.267	0.386018	0.228364	-1.69036	0.0909593	0.395622	CA-CN
Usf1	3034.98	0.385851	0.136344	-2.82998	0.00465508	0.0703998	CA-CN
Selenoh	351.063	0.385618	0.250538	-1.53916	0.123765	0.460504	CA-CN
Dpm3	580.412	0.385399	0.22594	-1.70576	0.0880535	0.388649	CA-CN
Jmjd7	177.488	0.385351	0.319376	-1.20657	0.227596	0.605615	CA-CN
Hmgcl	1739.8	0.384725	0.144947	-2.65425	0.00794859	0.0969111	CA-CN
Man1c1	3358.4	0.384066	0.135255	-2.83958	0.00451736	0.0693377	CA-CN
Atp5k	650.4	0.384042	0.188065	-2.04206	0.0411451	0.256845	CA-CN
Platr17	83.2508	0.383999	0.519291	-0.739468	0.459623	0.77596	CA-CN
Dpp3	1566.71	0.382503	0.15001	-2.54986	0.0107767	0.118926	CA-CN
Tppp3	7158.81	0.382145	0.562311	-0.679597	0.49676	0.795644	CA-CN
Mcm5	397.823	0.382126	0.222556	-1.71699	0.0859816	0.383621	CA-CN
Clec2g	310.257	0.382123	0.251123	-1.52165	0.128096	0.470548	CA-CN
Icmt	1494.27	0.381909	0.148833	-2.56602	0.0102873	0.115035	CA-CN
Etfrf1	442.1	0.381185	0.219869	-1.73369	0.0829726	0.378885	CA-CN
Atxn7l1	1127.65	0.381163	0.174418	-2.18534	0.0288638	0.209273	CA-CN
Rnf217	697.28	0.38067	0.205266	-1.85452	0.0636652	0.323485	CA-CN
Dpp9	1732.11	0.379754	0.156369	-2.42857	0.0151584	0.14561	CA-CN
Ldha	4863.01	0.379297	0.128867	-2.94331	0.00324719	0.0546425	CA-CN
Map3k10	585.495	0.379139	0.200038	-1.89534	0.0580477	0.309382	CA-CN
Fen1	276.875	0.379136	0.328271	-1.15495	0.248112	0.62315	CA-CN
Eci2	799.11	0.378617	0.179973	-2.10375	0.0354004	0.235102	CA-CN
Bcl6	3398.86	0.378578	0.197924	-1.91275	0.0557804	0.303865	CA-CN
Mpv17l2	474.536	0.378375	0.238706	-1.58511	0.112942	0.439397	CA-CN
Map3k4	641.692	0.377913	0.198614	-1.90275	0.0570731	0.30752	CA-CN
Midn	3217.2	0.37772	0.134268	-2.81317	0.0049056	0.072148	CA-CN
Mvp	2955.82	0.377591	0.140003	-2.69702	0.0069963	0.09026	CA-CN
Ulk1	2205.78	0.377542	0.135435	-2.78762	0.00530969	0.0754834	CA-CN
Mtx2	471.776	0.376931	0.209725	-1.79726	0.0722946	0.348529	CA-CN
Zmiz1	7252.75	0.37682	0.162435	-2.31982	0.0203508	0.171477	CA-CN
Agpat3	680.854	0.376574	0.184868	-2.03698	0.0416518	0.25957	CA-CN
Slc2a6	3587.39	0.376444	0.133222	-2.82569	0.00471786	0.0709345	CA-CN
Ckap4	1450.71	0.376386	0.154348	-2.43855	0.0147465	0.142684	CA-CN
Xylt2	526.395	0.376044	0.237006	-1.58664	0.112594	0.439397	CA-CN
Itgal	27075.5	0.376006	0.133151	-2.8239	0.00474433	0.0710682	CA-CN
Cs	4988.37	0.375823	0.128123	-2.9333	0.00335385	0.0555927	CA-CN
Dram1	2862.42	0.375777	0.131843	-2.85018	0.0043694	0.0674505	CA-CN
Ola1	1101.08	0.375733	0.171619	-2.18934	0.028572	0.207997	CA-CN
B3gnt8	1195.87	0.375274	0.201393	-1.86339	0.0624077	0.32113	CA-CN
St3gal2	1271.5	0.375161	0.185406	-2.02345	0.0430268	0.263925	CA-CN
Zc3h4	2321.37	0.374874	0.152506	-2.45809	0.0139676	0.139181	CA-CN
Map4k4	5507.44	0.374386	0.119913	-3.12216	0.00179529	0.0356808	CA-CN
Llph	166.027	0.374289	0.335026	-1.11719	0.263912	0.634786	CA-CN
Lage3	404.613	0.374262	0.234147	-1.5984	0.109953	0.436025	CA-CN
Fam160a2	2077.58	0.374112	0.165242	-2.26403	0.0235725	0.186275	CA-CN
Sbk1	1453.37	0.373869	0.162368	-2.3026	0.0213012	0.176182	CA-CN
Lap3	446.622	0.372878	0.218887	-1.70352	0.0884715	0.389785	CA-CN
Rapgef1	3905.93	0.372868	0.141244	-2.63989	0.00829334	0.099385	CA-CN
Dph1	518.116	0.372508	0.202478	-1.83974	0.0658062	0.330215	CA-CN
Lrpprc	1072.19	0.371898	0.161474	-2.30314	0.0212707	0.17611	CA-CN
Pcgf5	444.411	0.371607	0.225481	-1.64806	0.0993398	0.412902	CA-CN
Ap1m1	3669.79	0.371352	0.127176	-2.91998	0.00350052	0.057088	CA-CN
Gcn1l1	1174.18	0.371059	0.166532	-2.22816	0.02587	0.196766	CA-CN
Pgam2	164.655	0.370715	0.3214	-1.15344	0.248732	0.62315	CA-CN
Nfs1	933.053	0.370263	0.165647	-2.23525	0.025401	0.194906	CA-CN
Tmppe	1152.92	0.370141	0.161138	-2.29704	0.0216165	0.177339	CA-CN
Arid1b	2215.01	0.370033	0.152935	-2.41954	0.0155401	0.14754	CA-CN
St3gal1	6896.17	0.369673	0.127953	-2.88913	0.00386313	0.0613464	CA-CN
Orai2	1784.4	0.369375	0.146847	-2.51537	0.0118907	0.126725	CA-CN
Zfp574	547.752	0.368779	0.205069	-1.79831	0.0721273	0.348529	CA-CN
Mrpl58	542.471	0.368063	0.1991	-1.84864	0.0645104	0.326549	CA-CN
Csnk1g1	1509.54	0.367196	0.162389	-2.26122	0.0237458	0.18703	CA-CN
Plac8	37987.9	0.366962	0.133705	-2.74457	0.00605901	0.0823734	CA-CN
2010016I18Rik	331.131	0.366799	0.33322	-1.10077	0.270996	0.640213	CA-CN
Txn1	2830.09	0.366493	0.137004	-2.67505	0.00747179	0.0938943	CA-CN
Rfng	634.648	0.366218	0.188031	-1.94765	0.0514564	0.291274	CA-CN
1110065P20Rik	166.967	0.365854	0.344333	-1.0625	0.288009	0.65478	CA-CN
Klhl36	507.943	0.365716	0.234835	-1.55733	0.119391	0.453406	CA-CN
Wipi1	326.276	0.3644	0.254072	-1.43424	0.151504	0.509994	CA-CN
BC005624	746.724	0.363894	0.177802	-2.04662	0.0406951	0.255228	CA-CN
Etv6	4033.62	0.363615	0.134522	-2.70302	0.00687119	0.0892152	CA-CN
Tsta3	626.436	0.36355	0.18779	-1.93594	0.0528754	0.295788	CA-CN
Apoc2	1450.33	0.36314	0.215864	-1.68226	0.0925182	0.399045	CA-CN
Taldo1	13815.9	0.362926	0.114291	-3.17545	0.00149602	0.031611	CA-CN
Mrpl11	490.816	0.362738	0.212435	-1.70752	0.0877249	0.388613	CA-CN
Prrc2b	2558.33	0.362696	0.1376	-2.63586	0.00839232	0.0997496	CA-CN
Ano6	3478.26	0.362625	0.125618	-2.88674	0.00389261	0.0613787	CA-CN
D10Jhu81e	676.284	0.362088	0.199445	-1.81548	0.0694507	0.341097	CA-CN
Pigf	608.946	0.362057	0.198435	-1.82456	0.0680668	0.337166	CA-CN
Sprtn	452.755	0.361891	0.224018	-1.61546	0.106212	0.430867	CA-CN
B4galt5	7693.64	0.361752	0.118058	-3.0642	0.00218256	0.0410576	CA-CN
Incenp	527.536	0.361477	0.20188	-1.79055	0.0733652	0.35157	CA-CN
Plekhm1	2370.31	0.361343	0.15007	-2.40783	0.0160478	0.149551	CA-CN
Ifitm5	92.1744	0.361125	0.479574	-0.753013	0.451442	0.773182	CA-CN
Noct	347.544	0.360984	0.262006	-1.37777	0.168275	0.535896	CA-CN
Sash1	710.512	0.360687	0.185674	-1.94258	0.0520664	0.293495	CA-CN
Ctns	1666.04	0.360669	0.157195	-2.29441	0.0217672	0.177823	CA-CN
Rps19	1904.29	0.359962	0.146854	-2.45115	0.0142399	0.140263	CA-CN
Uqcrq	1766.8	0.359575	0.141457	-2.54194	0.0110238	0.120425	CA-CN
Esyt1	9465.75	0.359524	0.119059	-3.01972	0.00253009	0.0456487	CA-CN
Slc38a7	767.082	0.359354	0.181793	-1.97672	0.048073	0.281173	CA-CN
Man2b2	2554.23	0.359323	0.14649	-2.45288	0.0141718	0.140141	CA-CN
Rbm42	2068.38	0.35839	0.143783	-2.49257	0.0126823	0.132371	CA-CN
Stim1	1342.37	0.357904	0.171172	-2.0909	0.0365372	0.238346	CA-CN
Ssh1	759.99	0.357761	0.194732	-1.8372	0.0661803	0.331475	CA-CN
Lrp5	1681.38	0.357752	0.182614	-1.95907	0.0501049	0.287125	CA-CN
Adat3	142.291	0.357374	0.392759	-0.909905	0.362872	0.711767	CA-CN
Spout1	358.956	0.357361	0.237208	-1.50653	0.131931	0.475717	CA-CN
Ints1	1157.71	0.357256	0.171368	-2.08473	0.0370935	0.240039	CA-CN
Prps1	479.675	0.357062	0.216546	-1.6489	0.099168	0.412851	CA-CN
Scap	990.645	0.357012	0.163012	-2.1901	0.0285172	0.207896	CA-CN
Smim12	492.664	0.356964	0.225915	-1.58008	0.114088	0.441983	CA-CN
Trpv2	3320.52	0.356459	0.126008	-2.82886	0.00467142	0.0703998	CA-CN
Cetn3	637.835	0.356102	0.196549	-1.81178	0.0700208	0.342369	CA-CN
Fas	786.08	0.355605	0.180492	-1.9702	0.0488159	0.283469	CA-CN
Lsm5	33.5304	0.355293	0.723379	-0.491158	0.623315	0.861321	CA-CN
Ctsd	7084.2	0.354884	0.130369	-2.72215	0.00648578	0.0861943	CA-CN
Aco2	2554.75	0.354671	0.134023	-2.64635	0.00813662	0.0982786	CA-CN
Mvd	1160.11	0.354573	0.170001	-2.08572	0.0370043	0.240004	CA-CN
Bod1	179.592	0.354401	0.330293	-1.07299	0.283275	0.65174	CA-CN
Gm44805	1396.06	0.354378	0.221069	-1.60302	0.10893	0.435267	CA-CN
Xylt1	936.078	0.354337	0.165757	-2.13769	0.0325416	0.225175	CA-CN
Rubcn	1025.06	0.354237	0.190437	-1.86012	0.0628681	0.322444	CA-CN
Clip1	2321.85	0.353697	0.137321	-2.57569	0.0100041	0.112863	CA-CN
Gclm	432.105	0.353249	0.231445	-1.52628	0.126941	0.46759	CA-CN
Galm	344.824	0.353007	0.241649	-1.46082	0.144064	0.496089	CA-CN
Ext2	1410.76	0.352977	0.184972	-1.90828	0.0563556	0.305127	CA-CN
Cbx1	343.292	0.35282	0.238464	-1.47955	0.138994	0.488331	CA-CN
Zdhhc3	1362.53	0.352624	0.171468	-2.05649	0.0397349	0.251555	CA-CN
Otud3	228.044	0.352409	0.309329	-1.13927	0.254591	0.626613	CA-CN
Atf6b	3225.99	0.352362	0.159461	-2.20971	0.0271256	0.201999	CA-CN
Acbd6	608.731	0.351897	0.215421	-1.63353	0.102358	0.419653	CA-CN
Pnpo	924.968	0.351794	0.171288	-2.05382	0.0399935	0.252599	CA-CN
Tab1	617.493	0.351723	0.220088	-1.5981	0.110021	0.436025	CA-CN
Snx19	882.012	0.351584	0.173041	-2.0318	0.0421742	0.261788	CA-CN
Anapc13	336.37	0.351515	0.254923	-1.3789	0.167924	0.53577	CA-CN
Emc1	1069.79	0.351506	0.17249	-2.03783	0.0415668	0.25924	CA-CN
Prkrip1	220.641	0.350967	0.302352	-1.16079	0.245727	0.621792	CA-CN
Snrnp25	131.943	0.350165	0.381829	-0.917071	0.359106	0.710816	CA-CN
Elmo1	2647.14	0.349951	0.142289	-2.45944	0.0139154	0.138965	CA-CN
Tor4a	2421.06	0.349947	0.144257	-2.42586	0.015272	0.146023	CA-CN
B4galnt1	12237.4	0.349908	0.124489	-2.81076	0.00494243	0.072326	CA-CN
Mtf1	972.538	0.349759	0.165579	-2.11234	0.0346571	0.23363	CA-CN
Arfgap3	437.705	0.34962	0.247995	-1.40979	0.158602	0.52266	CA-CN
Wbp1l	2866.18	0.349498	0.131641	-2.65492	0.00793264	0.0969111	CA-CN
Fars2	397.91	0.349172	0.228581	-1.52756	0.126621	0.466624	CA-CN
Sh3pxd2b	1096.13	0.34916	0.161558	-2.16121	0.0306795	0.217791	CA-CN
Hopx	3162.38	0.348515	0.140663	-2.47766	0.0132248	0.136298	CA-CN
Grn	13227.9	0.34807	0.115462	-3.01458	0.00257335	0.0456487	CA-CN
Bccip	734.602	0.347544	0.184361	-1.88512	0.0594134	0.312277	CA-CN
Mrpl4	1477.44	0.347342	0.156727	-2.21623	0.026676	0.200355	CA-CN
Sec23ip	1408.88	0.347331	0.1585	-2.19136	0.0284255	0.207645	CA-CN
Pigs	1896.31	0.347309	0.156808	-2.21487	0.0267693	0.200869	CA-CN
Retsat	242.453	0.347243	0.289938	-1.19765	0.231055	0.609647	CA-CN
Eef2	57110.1	0.347053	0.125095	-2.77432	0.00553169	0.078227	CA-CN
Rab1b	5827.81	0.346821	0.132311	-2.62126	0.00876049	0.10285	CA-CN
Ap1s1	896.67	0.346688	0.170462	-2.03381	0.0419706	0.260753	CA-CN
Ankrd37	85.8384	0.346271	0.499296	-0.693518	0.487985	0.792332	CA-CN
Fadd	366.946	0.34608	0.276861	-1.25001	0.211295	0.589671	CA-CN
Tomm40	754.842	0.34608	0.183304	-1.88801	0.059025	0.311507	CA-CN
Lrrk1	2425.68	0.34603	0.148637	-2.32803	0.0199107	0.169892	CA-CN
Nfkb2	4231.02	0.345572	0.128098	-2.69772	0.00698155	0.09026	CA-CN
Fem1b	1538.86	0.345476	0.152653	-2.26314	0.0236269	0.186275	CA-CN
Akap13	17739.1	0.345384	0.113316	-3.04798	0.00230387	0.0426453	CA-CN
Klhl25	343.057	0.345136	0.261429	-1.32019	0.186771	0.558931	CA-CN
Dtx3	1123.68	0.345132	0.161278	-2.13998	0.0323564	0.224906	CA-CN
Nfe2l2	6134.12	0.344628	0.126217	-2.73044	0.0063249	0.0849869	CA-CN
Armc10	745.873	0.344522	0.179399	-1.92043	0.054804	0.300753	CA-CN
Relt	3040.34	0.344191	0.139005	-2.47612	0.0132821	0.136517	CA-CN
Ciz1	1457.47	0.344103	0.147302	-2.33604	0.019489	0.168067	CA-CN
Tctn1	555.746	0.34358	0.199362	-1.7234	0.084816	0.381861	CA-CN
Dynlt1f	130.351	0.342801	0.358424	-0.956412	0.338864	0.698269	CA-CN
Slc35a5	1655.16	0.34243	0.151273	-2.26365	0.0235955	0.186275	CA-CN
Slc35c1	2383.39	0.342029	0.140883	-2.42775	0.0151929	0.14561	CA-CN
Pgd	8122.86	0.341713	0.116022	-2.94526	0.00322687	0.0546069	CA-CN
Zfp830	534.699	0.34108	0.204819	-1.66528	0.0958577	0.406202	CA-CN
Ddhd1	6273.89	0.341051	0.12858	-2.65244	0.00799123	0.0970587	CA-CN
Zxdc	472.644	0.340963	0.22151	-1.53927	0.123739	0.460504	CA-CN
Acly	5434.42	0.34043	0.123903	-2.74754	0.00600444	0.082159	CA-CN
Lhpp	202.938	0.340402	0.302441	-1.12552	0.260371	0.633178	CA-CN
Babam1	1284.27	0.340336	0.154818	-2.19829	0.0279282	0.205412	CA-CN
Cep19	243.973	0.339976	0.291356	-1.16688	0.24326	0.619996	CA-CN
Id2	2142.01	0.339892	0.14091	-2.41212	0.0158599	0.148416	CA-CN
Samd8	1086.31	0.339794	0.177709	-1.91208	0.0558656	0.303898	CA-CN
Bicra	1777.68	0.339551	0.175198	-1.9381	0.0526111	0.294921	CA-CN
Tbcd	1101.63	0.339268	0.171476	-1.97852	0.0478704	0.281131	CA-CN
Map2k3	1661.32	0.339075	0.146483	-2.31477	0.0206256	0.172614	CA-CN
Stat3	8668.54	0.338904	0.12225	-2.77221	0.00556764	0.0783795	CA-CN
Tmem132a	595.105	0.338834	0.204368	-1.65796	0.0973253	0.408881	CA-CN
Gzf1	1557.51	0.338822	0.161745	-2.09479	0.0361897	0.237976	CA-CN
S1pr2	861.663	0.338582	0.210069	-1.61176	0.107014	0.432991	CA-CN
Lfng	5152.15	0.338541	0.154589	-2.18995	0.0285281	0.207896	CA-CN
Rinl	1123.78	0.336809	0.159873	-2.10673	0.0351409	0.234534	CA-CN
Trim23	412.495	0.336741	0.248992	-1.35242	0.176242	0.545746	CA-CN
Zbtb34	1970.41	0.336675	0.141644	-2.37691	0.0174584	0.156883	CA-CN
Eefsec	256.765	0.336614	0.286735	-1.17396	0.240413	0.616972	CA-CN
1700071M16Rik	2929.02	0.336026	0.130224	-2.58037	0.00986942	0.111969	CA-CN
Chsy1	2555.12	0.335902	0.149382	-2.24861	0.0245375	0.190667	CA-CN
Slc12a9	2540.82	0.335502	0.13354	-2.51236	0.0119925	0.127307	CA-CN
Ddost	3135.42	0.3354	0.129644	-2.58709	0.00967917	0.110742	CA-CN
App	12851.2	0.335107	0.126669	-2.64553	0.00815632	0.0983256	CA-CN
Dnal4	552.172	0.335098	0.199389	-1.68062	0.0928362	0.39983	CA-CN
Emc10	1545.73	0.334984	0.158534	-2.11301	0.0345998	0.233621	CA-CN
0610009O20Rik	519.756	0.334975	0.203618	-1.64512	0.0999458	0.412902	CA-CN
Lsm2	332.334	0.334396	0.249661	-1.3394	0.18044	0.550501	CA-CN
Ndufs6	505.828	0.33437	0.228808	-1.46135	0.143918	0.496089	CA-CN
Smim13	971.358	0.334172	0.177542	-1.88221	0.059807	0.313532	CA-CN
Pelp1	525.943	0.333842	0.227356	-1.46836	0.142006	0.49337	CA-CN
Itpripl2	3460.93	0.33373	0.165777	-2.01312	0.044102	0.268159	CA-CN
Med16	730.326	0.333671	0.18783	-1.77645	0.0756588	0.358736	CA-CN
Med24	1151.87	0.333646	0.165242	-2.01913	0.0434734	0.265898	CA-CN
Efcab14	1096.51	0.333635	0.185023	-1.80321	0.0713557	0.346431	CA-CN
Mmp8	7410.13	0.333483	0.141441	-2.35774	0.0183864	0.16271	CA-CN
Ppp1r10	1194.55	0.332932	0.161851	-2.05703	0.0396838	0.251555	CA-CN
Galnt2	1543.56	0.332357	0.177895	-1.86827	0.061724	0.319657	CA-CN
Tmem115	854.507	0.331919	0.171006	-1.94098	0.0522602	0.293874	CA-CN
Mrpl44	338.985	0.331596	0.240152	-1.38077	0.167348	0.53577	CA-CN
Bex3	168.052	0.331435	0.320715	-1.03342	0.301405	0.664686	CA-CN
Galnt4	792.317	0.330861	0.195839	-1.68945	0.0911324	0.39569	CA-CN
Ctsl	746.97	0.330686	0.1957	-1.68976	0.0910744	0.39569	CA-CN
Cpne1	3133.61	0.330679	0.128004	-2.58335	0.00978449	0.111318	CA-CN
Rad23a	1227.25	0.33038	0.181247	-1.82282	0.0683308	0.337441	CA-CN
Rnpep	5435.26	0.330079	0.130832	-2.52293	0.0116383	0.124857	CA-CN
Tsnax	1355.76	0.329902	0.150001	-2.19933	0.0278543	0.205412	CA-CN
Bmpr2	3791.15	0.329783	0.124094	-2.65753	0.00787152	0.0969111	CA-CN
Gsn	3118.25	0.329712	0.170699	-1.93155	0.0534157	0.29737	CA-CN
Calcoco1	812.55	0.329668	0.175655	-1.87679	0.0605464	0.316382	CA-CN
Alg5	486.787	0.329239	0.223318	-1.4743	0.1404	0.489734	CA-CN
Pygl	6912.55	0.32913	0.132192	-2.48979	0.0127818	0.133066	CA-CN
Pcgf1	182.912	0.329129	0.338013	-0.973716	0.330197	0.691311	CA-CN
Nedd8	1930.88	0.328932	0.151334	-2.17355	0.0297388	0.213643	CA-CN
Pi16	5281.23	0.328699	0.13892	-2.36611	0.0179763	0.160144	CA-CN
Palm	1860.3	0.328694	0.164563	-1.99737	0.0457853	0.273404	CA-CN
Slc39a1	1926.94	0.328437	0.139564	-2.35331	0.0186069	0.163599	CA-CN
Alyref2	223.081	0.328434	0.294135	-1.11661	0.264161	0.634818	CA-CN
Dcaf7	3963.34	0.328248	0.135057	-2.43044	0.0150806	0.145222	CA-CN
Tspan3	504.542	0.328155	0.207835	-1.57892	0.114355	0.442515	CA-CN
Pik3r5	5841.63	0.32797	0.13253	-2.47468	0.0133355	0.136718	CA-CN
Ctnnbip1	947.247	0.327962	0.168012	-1.95202	0.0509361	0.289748	CA-CN
Grina	5274.73	0.327372	0.121864	-2.68638	0.00722312	0.092449	CA-CN
Smarcd2	3985.6	0.32727	0.137079	-2.38745	0.0169657	0.154719	CA-CN
Timm10	173.876	0.327116	0.320584	-1.02037	0.307551	0.671103	CA-CN
Neurl2	263.333	0.326968	0.301693	-1.08378	0.278464	0.648387	CA-CN
Apobr	3492.38	0.326797	0.125633	-2.60121	0.00928968	0.107502	CA-CN
Atp8a1	3193.92	0.32606	0.129571	-2.51646	0.0118541	0.126668	CA-CN
Isoc1	2374.45	0.325763	0.141677	-2.29933	0.021486	0.176626	CA-CN
Dcun1d2	546.67	0.325752	0.208643	-1.56129	0.118456	0.451532	CA-CN
Ube2f	1893.39	0.325676	0.144726	-2.25029	0.0244303	0.190382	CA-CN
Slc25a20	774.564	0.325125	0.195979	-1.65898	0.0971191	0.408526	CA-CN
Acvr2a	695.076	0.325086	0.206979	-1.57062	0.116271	0.446387	CA-CN
Map3k14	3099.01	0.324808	0.140677	-2.30889	0.0209495	0.174701	CA-CN
Metap2	1588.87	0.324526	0.153817	-2.10981	0.0348743	0.233955	CA-CN
Grap	196.584	0.324472	0.346916	-0.935303	0.349632	0.704414	CA-CN
Tbc1d2	490.762	0.324063	0.21006	-1.54272	0.1229	0.459983	CA-CN
Borcs7	435.415	0.323686	0.223892	-1.44572	0.148255	0.503929	CA-CN
Mthfd1l	652.655	0.323589	0.188205	-1.71934	0.0855519	0.383538	CA-CN
Sos2	1808.31	0.322344	0.15706	-2.05237	0.0401339	0.252837	CA-CN
Gab2	1688.94	0.322335	0.147443	-2.18616	0.0288037	0.209212	CA-CN
Eef1akmt1	357.358	0.321976	0.237415	-1.35618	0.175043	0.543751	CA-CN
Nln	1007.67	0.321812	0.16968	-1.89659	0.0578825	0.309247	CA-CN
Iqgap2	2565.66	0.321773	0.15536	-2.07114	0.0383455	0.245782	CA-CN
Scamp4	901.004	0.321029	0.181054	-1.77312	0.0762095	0.359814	CA-CN
Aldh16a1	1504.05	0.321006	0.151428	-2.11986	0.0340178	0.231518	CA-CN
St3gal3	645.289	0.320995	0.229304	-1.39986	0.161555	0.526502	CA-CN
Mrpl20	886.646	0.320972	0.173747	-1.84735	0.0646965	0.326648	CA-CN
Smarca4	2648.53	0.320826	0.139961	-2.29225	0.0218914	0.177823	CA-CN
Gm8615	846.759	0.320776	0.17484	-1.83469	0.0665523	0.332868	CA-CN
Fbxw8	971.772	0.320727	0.187379	-1.71165	0.0869617	0.38629	CA-CN
Uqcc2	477.806	0.320541	0.214622	-1.49351	0.135303	0.482145	CA-CN
Tmem51os1	193.207	0.320462	0.312752	-1.02465	0.305526	0.668019	CA-CN
Nav1	4317.33	0.320313	0.138066	-2.32	0.0203407	0.171477	CA-CN
4833438C02Rik	895.316	0.320168	0.17089	-1.87353	0.0609951	0.317701	CA-CN
Lmnb1	875.935	0.320059	0.171213	-1.86937	0.0615717	0.319657	CA-CN
Psmd3	1513.62	0.32001	0.160377	-1.99536	0.0460039	0.274025	CA-CN
2010-09-01	346.448	0.319696	0.235691	-1.35642	0.174966	0.543751	CA-CN
Ubqln2	1113.81	0.319679	0.187593	-1.70411	0.0883602	0.389507	CA-CN
Taf3	826.865	0.319657	0.187339	-1.7063	0.0879516	0.388649	CA-CN
Prelid1	4041.86	0.319274	0.125615	-2.54169	0.0110316	0.120425	CA-CN
Rptor	1104.87	0.318716	0.169061	-1.88522	0.0594004	0.312277	CA-CN
Axin1	1510.75	0.318525	0.148955	-2.1384	0.0324842	0.225163	CA-CN
Irak4	2072.08	0.318353	0.139933	-2.27504	0.0229037	0.183071	CA-CN
Acot7	922.171	0.318118	0.169627	-1.8754	0.0607384	0.316976	CA-CN
Rab31	7403.66	0.317893	0.125698	-2.52901	0.0114385	0.123533	CA-CN
Tfpt	315.488	0.317811	0.27727	-1.14622	0.251705	0.625549	CA-CN
Hs1bp3	409.443	0.317431	0.221151	-1.43536	0.151184	0.509293	CA-CN
Commd3	843.133	0.317369	0.179086	-1.77216	0.0763676	0.360197	CA-CN
0610010K14Rik	688.974	0.317056	0.183989	-1.72323	0.0848475	0.381861	CA-CN
Gm16982	540.947	0.316625	0.201594	-1.5706	0.116275	0.446387	CA-CN
Rpap1	695.469	0.316571	0.191721	-1.65121	0.0986963	0.411719	CA-CN
Kctd12b	1363.78	0.316288	0.194495	-1.6262	0.103907	0.424068	CA-CN
Pebp1	263.395	0.316036	0.275809	-1.14585	0.251857	0.625549	CA-CN
Ndufa10	1504.53	0.315458	0.148115	-2.12983	0.033186	0.228206	CA-CN
Itgav	2187.43	0.315362	0.155461	-2.02855	0.0425039	0.262453	CA-CN
Vrk3	1251.27	0.315227	0.163045	-1.93337	0.0531906	0.296526	CA-CN
Lamp2	12799.4	0.315178	0.112492	-2.80178	0.00508217	0.0731488	CA-CN
Slc25a4	1924.02	0.315008	0.147599	-2.13422	0.032825	0.226361	CA-CN
2010315B03Rik	459.018	0.314895	0.213101	-1.47768	0.139494	0.488847	CA-CN
BC017158	422.643	0.314605	0.229841	-1.36879	0.171064	0.539259	CA-CN
Dynlt1c	129.009	0.314444	0.360416	-0.872449	0.382964	0.728056	CA-CN
Inip	1028.31	0.314383	0.165705	-1.89725	0.0577954	0.309195	CA-CN
Man2b1	13193.8	0.314287	0.112431	-2.79538	0.00518389	0.0743484	CA-CN
Ap3s2	1017.05	0.314281	0.165676	-1.89696	0.0578332	0.309195	CA-CN
Il6st	5093.66	0.314275	0.133586	-2.35261	0.0186424	0.163733	CA-CN
Slc25a11	2647.02	0.31427	0.142821	-2.20044	0.0277754	0.205183	CA-CN
Plxnb2	14410.4	0.314242	0.132702	-2.36802	0.0178836	0.15967	CA-CN
Uprt	199.964	0.313789	0.296467	-1.05843	0.289859	0.656035	CA-CN
Gm20319	85.6428	0.31378	0.458417	-0.684486	0.493668	0.793893	CA-CN
Mrpl13	306.694	0.313776	0.25643	-1.22363	0.221091	0.598989	CA-CN
Clta	5951.46	0.31361	0.145065	-2.16185	0.0306294	0.217791	CA-CN
Atp13a2	5315.31	0.31348	0.126368	-2.48069	0.0131127	0.135812	CA-CN
Snrpf	136.131	0.313217	0.360634	-0.868518	0.385111	0.729717	CA-CN
Nucb1	3609.96	0.313212	0.13162	-2.37967	0.0173279	0.156416	CA-CN
Coro1b	12212.4	0.313008	0.122697	-2.55107	0.0107393	0.118748	CA-CN
Pgs1	2411.62	0.31226	0.133263	-2.34319	0.0191198	0.165944	CA-CN
Eif3i	2107.69	0.312153	0.142598	-2.18905	0.0285935	0.207997	CA-CN
Lamtor2	1004.78	0.312072	0.173814	-1.79544	0.0725835	0.348858	CA-CN
Sumf2	307.639	0.312008	0.250541	-1.24534	0.213007	0.591695	CA-CN
Mybbp1a	1852.85	0.311942	0.157653	-1.97867	0.0478535	0.281131	CA-CN
Ccni	3788.05	0.311579	0.127116	-2.45114	0.0142405	0.140263	CA-CN
9330133O14Rik	506.711	0.311526	0.211282	-1.47445	0.14036	0.489734	CA-CN
Synrg	1445.46	0.311294	0.15911	-1.95648	0.050409	0.287356	CA-CN
Ccdc97	2297.23	0.311209	0.1418	-2.1947	0.0281849	0.206969	CA-CN
Cpox	595.193	0.311086	0.217544	-1.42999	0.15272	0.512805	CA-CN
Ndufa8	1042.52	0.311045	0.171002	-1.81896	0.0689177	0.339536	CA-CN
Rbm15b	649.243	0.310862	0.225926	-1.37595	0.168839	0.536635	CA-CN
Ctnnb1	9752.49	0.310756	0.117113	-2.65346	0.0079671	0.0969111	CA-CN
Golga2	1371.4	0.310468	0.156461	-1.98432	0.0472206	0.279012	CA-CN
Ints3	1155.64	0.310456	0.157995	-1.96497	0.0494179	0.285122	CA-CN
AW112010	428.65	0.310403	0.331466	-0.936456	0.349038	0.704414	CA-CN
Dhrs7	1575.32	0.309951	0.151787	-2.042	0.0411512	0.256845	CA-CN
Dnaja3	653.675	0.309664	0.199637	-1.55113	0.12087	0.456433	CA-CN
Ebag9	292.809	0.309631	0.283826	-1.09092	0.275309	0.644377	CA-CN
Cnr2	1995.24	0.309491	0.139153	-2.22411	0.0261413	0.197633	CA-CN
Xpo6	2736.56	0.309112	0.142824	-2.16428	0.0304427	0.216961	CA-CN
Slc8a1	3345.38	0.308958	0.131061	-2.35736	0.0184052	0.16271	CA-CN
Pnpla2	2404.44	0.308925	0.136501	-2.26316	0.0236257	0.186275	CA-CN
Rab9	618.888	0.308848	0.196329	-1.57311	0.115692	0.445423	CA-CN
Arntl	311.386	0.308503	0.264057	-1.16832	0.242677	0.619639	CA-CN
Trp53rka	303.743	0.308406	0.252612	-1.22087	0.222136	0.600153	CA-CN
Gadd45a	160.988	0.308337	0.377871	-0.815983	0.41451	0.752383	CA-CN
Anxa1	19072.7	0.307599	0.376107	-0.81785	0.413443	0.751537	CA-CN
1810043G02Rik	470.753	0.307556	0.208174	-1.4774	0.139568	0.488847	CA-CN
Sf3a2	1459.73	0.307536	0.184833	-1.66385	0.0961417	0.406385	CA-CN
Shb	304.083	0.307385	0.271978	-1.13018	0.258399	0.63186	CA-CN
Rsl24d1	730.867	0.307384	0.18008	-1.70693	0.0878359	0.388649	CA-CN
Glod4	780.644	0.307021	0.178317	-1.72177	0.0851113	0.382056	CA-CN
Rtca	473.287	0.30692	0.213315	-1.43881	0.150204	0.507731	CA-CN
Hipk3	4378.64	0.306648	0.122477	-2.50372	0.0122894	0.129103	CA-CN
Nabp2	776.859	0.30661	0.18445	-1.66229	0.0964541	0.406721	CA-CN
Ap2s1	2662.99	0.306515	0.133883	-2.28942	0.0220549	0.178402	CA-CN
Trdmt1	313.951	0.306241	0.253429	-1.20839	0.226897	0.605302	CA-CN
Hnmt	462.48	0.306052	0.225244	-1.35876	0.174223	0.54287	CA-CN
Ap5s1	400.634	0.305178	0.222617	-1.37086	0.170418	0.538479	CA-CN
Brap	1569.42	0.304748	0.147502	-2.06606	0.0388231	0.247861	CA-CN
Itprip	2023.88	0.304721	0.160966	-1.89308	0.0583478	0.309889	CA-CN
H13	6103.91	0.30472	0.119458	-2.55086	0.0107459	0.118748	CA-CN
Ndufa13	1313.21	0.3045	0.191431	-1.59065	0.111687	0.43835	CA-CN
Kti12	577.25	0.304366	0.198423	-1.53392	0.125048	0.462913	CA-CN
Rps6kc1	792.822	0.304275	0.176259	-1.7263	0.0842941	0.381861	CA-CN
Zfp142	711.823	0.30424	0.2313	-1.31535	0.188393	0.562123	CA-CN
Depdc7	519.269	0.304086	0.221789	-1.37106	0.170357	0.538479	CA-CN
Faap24	193.264	0.303964	0.312904	-0.97143	0.331334	0.691889	CA-CN
Ppp2r5d	1089.53	0.303898	0.164737	-1.84475	0.0650741	0.32786	CA-CN
Ndufb5	1494.04	0.302685	0.15306	-1.97756	0.0479784	0.281131	CA-CN
Rnf19b	3851.61	0.302681	0.135633	-2.23161	0.0256405	0.195851	CA-CN
Zfp52	677.814	0.30255	0.190035	-1.59207	0.111368	0.438161	CA-CN
Phkb	892.17	0.302138	0.171975	-1.75687	0.0789407	0.367617	CA-CN
Slc41a3	569.364	0.301872	0.200593	-1.50489	0.132351	0.476452	CA-CN
Ccdc32	502	0.301695	0.204166	-1.4777	0.139488	0.488847	CA-CN
Fam120a	7732.9	0.301654	0.116464	-2.5901	0.00959482	0.110027	CA-CN
Tgfbr2	3427.85	0.301481	0.173962	-1.73303	0.0830905	0.378951	CA-CN
Nop53	5492.35	0.301261	0.143795	-2.09507	0.0361644	0.237976	CA-CN
Psmb4	3301.53	0.301069	0.135431	-2.22304	0.0262128	0.197979	CA-CN
Psen1	3987.93	0.301021	0.125289	-2.40262	0.0162782	0.151002	CA-CN
Rab24	1618.14	0.300954	0.15147	-1.9869	0.046934	0.27811	CA-CN
Ino80b	759.404	0.300652	0.200104	-1.50248	0.132973	0.477628	CA-CN
Spi1	14837.6	0.300414	0.126521	-2.37442	0.0175765	0.157624	CA-CN
Zfp652	799.254	0.29962	0.174896	-1.71314	0.0866873	0.385706	CA-CN
Chchd5	263.121	0.299444	0.272989	-1.09691	0.272681	0.642131	CA-CN
Pccb	376.105	0.299298	0.254934	-1.17402	0.240387	0.616972	CA-CN
Btbd2	844.052	0.299139	0.198634	-1.50598	0.132072	0.475872	CA-CN
Tomm6	1791.27	0.299078	0.143375	-2.08599	0.0369799	0.240004	CA-CN
Msrb1	21687.3	0.29874	0.11019	-2.71114	0.00670522	0.0877324	CA-CN
Get4	479.722	0.298712	0.219297	-1.36213	0.173156	0.542818	CA-CN
Akna	8180.1	0.298555	0.116978	-2.55224	0.0107033	0.118602	CA-CN
Tmem101	349.687	0.298542	0.247457	-1.20644	0.227647	0.605615	CA-CN
Cndp2	3252.63	0.298425	0.127177	-2.34653	0.0189489	0.165386	CA-CN
Nmt1	3379.6	0.298214	0.126981	-2.34849	0.0188495	0.164836	CA-CN
Ecm1	948.449	0.298014	0.21012	-1.41831	0.156102	0.518778	CA-CN
Ms4a6d	11544.1	0.297786	0.114918	-2.5913	0.00956141	0.110017	CA-CN
Mmadhc	930.215	0.297667	0.172778	-1.72283	0.0849193	0.381861	CA-CN
Minpp1	577.112	0.297214	0.251756	-1.18057	0.237775	0.614101	CA-CN
Zdhhc9	2892.53	0.297161	0.128786	-2.30739	0.021033	0.17495	CA-CN
Pcbd2	191.396	0.297044	0.320461	-0.926928	0.353964	0.707141	CA-CN
Ndrg1	2562.33	0.2969	0.159551	-1.86084	0.0627668	0.322444	CA-CN
Vps28	2003.8	0.296878	0.137467	-2.15962	0.0308018	0.218296	CA-CN
Gmnn	169.448	0.296674	0.359246	-0.825823	0.408904	0.748315	CA-CN
Metrn	268.039	0.296479	0.263836	-1.12372	0.261131	0.633384	CA-CN
Gpatch2l	1652.8	0.296381	0.146607	-2.02161	0.0432167	0.264834	CA-CN
Wdr24	616.528	0.296315	0.192783	-1.53704	0.124284	0.461809	CA-CN
Tmem94	1622.63	0.296029	0.160123	-1.84876	0.0644928	0.326549	CA-CN
Gpd1l	1333.87	0.296011	0.156098	-1.89631	0.0579193	0.309247	CA-CN
Flna	52035.3	0.295879	0.110603	-2.67514	0.00746984	0.0938943	CA-CN
Bud13	363.991	0.295555	0.234694	-1.25932	0.207915	0.58539	CA-CN
E030030I06Rik	429.136	0.295496	0.218755	-1.35081	0.176757	0.545746	CA-CN
Nt5dc1	564.984	0.295431	0.200966	-1.47006	0.141546	0.492518	CA-CN
Eif4b	8983.77	0.29499	0.11406	-2.58626	0.00970235	0.11083	CA-CN
Ppp2cb	3027.96	0.294799	0.13329	-2.21171	0.0269866	0.201519	CA-CN
Pip5k1c	4841.06	0.294773	0.128159	-2.30005	0.0214452	0.17647	CA-CN
Ube4b	1571.66	0.294411	0.15114	-1.94793	0.0514228	0.291274	CA-CN
Pycard	2751.51	0.294041	0.13116	-2.24185	0.0249708	0.192554	CA-CN
Oxa1l	2436.54	0.293948	0.137011	-2.14543	0.0319186	0.222962	CA-CN
Ltbr	3522.07	0.293935	0.140113	-2.09785	0.0359188	0.237181	CA-CN
Rpn2	4933.54	0.29369	0.121511	-2.41699	0.0156495	0.147863	CA-CN
Lrrc61	637.49	0.293131	0.197807	-1.48191	0.138366	0.48689	CA-CN
Xpnpep1	1124.28	0.292868	0.159029	-1.8416	0.0655338	0.329193	CA-CN
Ints7	659.243	0.292693	0.208244	-1.40553	0.159864	0.523257	CA-CN
Fto	707.025	0.292631	0.18444	-1.58659	0.112605	0.439397	CA-CN
Tmem51	2546.97	0.292382	0.162376	-1.80064	0.0717593	0.347307	CA-CN
Znhit1	2039.27	0.292362	0.139502	-2.09576	0.0361038	0.237976	CA-CN
Laptm5	28743.1	0.292349	0.128498	-2.27513	0.0228979	0.183071	CA-CN
Foxk1	3624.8	0.292337	0.135812	-2.15252	0.0313564	0.220558	CA-CN
Prpf8	5491.41	0.292169	0.12653	-2.30909	0.0209384	0.174701	CA-CN
Ndufa5	254.344	0.291709	0.270583	-1.07807	0.281001	0.650709	CA-CN
Sirpa	35741.1	0.291652	0.118831	-2.45433	0.0141147	0.14009	CA-CN
Clec5a	1326.06	0.291343	0.164208	-1.77423	0.0760259	0.359634	CA-CN
Slc2a1	954.463	0.291305	0.164819	-1.76743	0.0771564	0.362859	CA-CN
Stat5b	4614.73	0.291241	0.127243	-2.28885	0.0220878	0.17849	CA-CN
Tmem176b	7733.35	0.291219	0.127049	-2.29218	0.0218954	0.177823	CA-CN
Ddrgk1	969.896	0.290361	0.180611	-1.60766	0.10791	0.433898	CA-CN
Acox1	1196.19	0.290097	0.164316	-1.76548	0.0774835	0.363552	CA-CN
Cisd2	1743.91	0.29005	0.143704	-2.01839	0.0435509	0.266075	CA-CN
Hpcal1	2685.41	0.289988	0.134807	-2.15113	0.0314656	0.220559	CA-CN
Ttc17	1362.6	0.289904	0.152034	-1.90683	0.056542	0.305727	CA-CN
Usp22	1341.95	0.288882	0.155941	-1.85251	0.0639532	0.324255	CA-CN
Cbl	4849.34	0.288807	0.125947	-2.29309	0.0218428	0.177823	CA-CN
Galc	1489.94	0.288653	0.150512	-1.91781	0.0551345	0.301598	CA-CN
Aldoa	12269.8	0.288432	0.12645	-2.281	0.0225485	0.181476	CA-CN
Sec24d	571.845	0.287878	0.285599	-1.00798	0.313464	0.676859	CA-CN
Qars	2464.32	0.287775	0.133398	-2.15726	0.0309851	0.218899	CA-CN
Med25	1560.01	0.287714	0.158021	-1.82073	0.0686472	0.33859	CA-CN
Slc25a1	729.136	0.287627	0.214715	-1.33957	0.180384	0.550501	CA-CN
Atg13	1364.96	0.28751	0.16454	-1.74735	0.0805762	0.372659	CA-CN
Mkrn2	320.933	0.286964	0.245562	-1.1686	0.242563	0.619544	CA-CN
Sepsecs	189.807	0.286963	0.34151	-0.840276	0.400754	0.741092	CA-CN
Pex14	418.05	0.286717	0.238325	-1.20305	0.228957	0.607024	CA-CN
Pdhx	450.555	0.286584	0.225542	-1.27065	0.203855	0.580284	CA-CN
Ssbp4	3480.33	0.286485	0.131122	-2.18487	0.0288982	0.209273	CA-CN
Tsen34	553.471	0.286332	0.228123	-1.25516	0.209419	0.586837	CA-CN
Ddx19a	621.342	0.286246	0.20016	-1.43009	0.152692	0.512805	CA-CN
Alkbh6	332.01	0.285941	0.239656	-1.19313	0.232818	0.611449	CA-CN
Plppr3	716.605	0.285871	0.194718	-1.46813	0.142068	0.49337	CA-CN
Mrpl34	444.226	0.285667	0.22008	-1.29801	0.194284	0.567557	CA-CN
Fut4	1089.8	0.285539	0.174636	-1.63505	0.102039	0.418767	CA-CN
Coro7	2940.6	0.285388	0.131304	-2.1735	0.0297429	0.213643	CA-CN
Mrpl51	280.08	0.284892	0.262788	-1.08411	0.278314	0.648387	CA-CN
Il18	767.408	0.284709	0.178496	-1.59505	0.110702	0.437334	CA-CN
Mcrs1	448.476	0.284485	0.258089	-1.10227	0.270343	0.639977	CA-CN
Ddit4	411.388	0.284345	0.232669	-1.2221	0.221669	0.599433	CA-CN
Rnf44	3295.51	0.284276	0.138239	-2.0564	0.0397437	0.251555	CA-CN
Spata2	1159.72	0.284257	0.158143	-1.79747	0.0722608	0.348529	CA-CN
Kcnk6	1465.9	0.28405	0.162285	-1.75031	0.0800641	0.371352	CA-CN
Scyl1	1881.9	0.283849	0.153963	-1.84362	0.0652387	0.328386	CA-CN
Mllt11	271.109	0.283724	0.264793	-1.07149	0.283947	0.651959	CA-CN
Tstd1	175.811	0.283396	0.329397	-0.860348	0.389597	0.732443	CA-CN
Scp2	2386.86	0.283374	0.136289	-2.07921	0.0375979	0.243065	CA-CN
Scamp1	525.785	0.283104	0.204912	-1.38159	0.167097	0.535729	CA-CN
Ppp1r15b	8964.66	0.282902	0.137241	-2.06135	0.0392692	0.249641	CA-CN
Tlr6	1690.43	0.28279	0.143867	-1.96564	0.0493408	0.28488	CA-CN
Fbxw9	225.292	0.282641	0.358877	-0.787573	0.430947	0.760954	CA-CN
Acot8	583.632	0.282244	0.202507	-1.39375	0.163393	0.529309	CA-CN
Cuedc2	1670.54	0.282189	0.153664	-1.8364	0.0662982	0.33186	CA-CN
Tbc1d15	1840.21	0.282179	0.145205	-1.94331	0.0519784	0.293203	CA-CN
Tpcn1	1222.64	0.282166	0.157139	-1.79565	0.0725505	0.348858	CA-CN
Abca3	4320.64	0.28216	0.129453	-2.17963	0.0292849	0.211316	CA-CN
Rab21	1572.56	0.2817	0.159158	-1.76994	0.0767371	0.361518	CA-CN
Cpt1a	5821.16	0.281687	0.12549	-2.2447	0.0247876	0.191686	CA-CN
Erlec1	745.43	0.281285	0.183189	-1.53549	0.124664	0.46236	CA-CN
U2af1	103.555	0.281242	0.41921	-0.670885	0.502294	0.797089	CA-CN
Mus81	367.658	0.280945	0.228696	-1.22846	0.219273	0.597446	CA-CN
Snrpc	269.576	0.280865	0.275857	-1.01816	0.308604	0.671542	CA-CN
Arpp19	1018.19	0.280612	0.162891	-1.7227	0.0849428	0.381861	CA-CN
Tgfbrap1	1858.47	0.280451	0.144523	-1.94053	0.0523153	0.293874	CA-CN
Mrpl30	948.076	0.280379	0.164947	-1.69982	0.0891657	0.391799	CA-CN
B4gat1	441.52	0.280099	0.22051	-1.27023	0.204003	0.580284	CA-CN
2610002M06Rik	609.845	0.27997	0.191449	-1.46238	0.143638	0.495686	CA-CN
Ubash3b	1008.46	0.279929	0.174372	-1.60536	0.108415	0.434613	CA-CN
Prex1	10643.8	0.279916	0.124991	-2.23948	0.0251246	0.193187	CA-CN
Foxn3	1067.86	0.279667	0.166057	-1.68416	0.0921504	0.398399	CA-CN
Sirt6	330.314	0.279486	0.242481	-1.15261	0.24907	0.623562	CA-CN
Ltb	2277.24	0.279305	0.153917	-1.81464	0.0695785	0.341332	CA-CN
Cabin1	3196.64	0.278879	0.131062	-2.12783	0.0333508	0.229011	CA-CN
Ubxn8	859.769	0.278869	0.170483	-1.63576	0.10189	0.418368	CA-CN
Zfp672	438.618	0.278843	0.226116	-1.23319	0.217506	0.596038	CA-CN
Ubl7	1303.81	0.278797	0.177038	-1.57478	0.115307	0.444361	CA-CN
Mrpl36	1035.73	0.278774	0.162322	-1.71741	0.0859041	0.383621	CA-CN
Lrrc41	1112.97	0.278709	0.176563	-1.57853	0.114444	0.442515	CA-CN
Hexb	4142.72	0.278673	0.127006	-2.19417	0.0282229	0.206977	CA-CN
Kcnab2	4156.65	0.278268	0.132553	-2.09929	0.0357913	0.237113	CA-CN
Zfp770	792.852	0.278122	0.224724	-1.23762	0.215859	0.594633	CA-CN
Galnt10	1625.17	0.278022	0.176261	-1.57733	0.11472	0.442882	CA-CN
Tmub2	1493.11	0.277934	0.150045	-1.85234	0.0639771	0.324255	CA-CN
Ncoa1	3174.6	0.277825	0.137132	-2.02596	0.0427684	0.263469	CA-CN
Nol6	885.39	0.277635	0.179796	-1.54416	0.122549	0.459462	CA-CN
Bri3bp	3073.61	0.277433	0.132223	-2.09822	0.0358857	0.237181	CA-CN
Hddc3	213.592	0.277386	0.297111	-0.933609	0.350506	0.70473	CA-CN
Rab27a	2999.04	0.277192	0.132627	-2.09001	0.0366169	0.23837	CA-CN
2006-03-01	2535.64	0.276559	0.13218	-2.09229	0.036413	0.237976	CA-CN
Pip4k2c	1162.3	0.276323	0.172162	-1.60502	0.10849	0.434613	CA-CN
Mtmr3	4388.32	0.276279	0.124937	-2.21134	0.0270122	0.201519	CA-CN
Arhgef3	4923.5	0.276259	0.13742	-2.01032	0.0443969	0.269469	CA-CN
Rps27a	110.674	0.276081	0.426244	-0.647705	0.517176	0.807323	CA-CN
Tex261	1121.48	0.275926	0.17231	-1.60133	0.109303	0.435543	CA-CN
Ndufa4	2075.56	0.275389	0.144519	-1.90555	0.0567081	0.306421	CA-CN
Eyelinc18	3259.67	0.275239	0.143142	-1.92283	0.0545011	0.299905	CA-CN
Mrps5	158.287	0.27514	0.337148	-0.816082	0.414453	0.752383	CA-CN
Snap29	2772.53	0.275119	0.130393	-2.10993	0.0348646	0.233955	CA-CN
Spr	488.903	0.275098	0.223896	-1.22869	0.219188	0.597446	CA-CN
Gtpbp1	1700.28	0.274928	0.179241	-1.53385	0.125068	0.462913	CA-CN
Igfbp4	339.593	0.274884	0.297818	-0.922993	0.356011	0.707746	CA-CN
Pih1d1	793.329	0.274855	0.185171	-1.48433	0.137721	0.48626	CA-CN
Ogfod1	784.658	0.274657	0.177614	-1.54637	0.122016	0.458236	CA-CN
Pigv	509.564	0.274598	0.218009	-1.25957	0.207824	0.585338	CA-CN
Leo1	366.075	0.274598	0.237172	-1.1578	0.246945	0.623062	CA-CN
Snrpa1	387.181	0.274577	0.237837	-1.15447	0.248306	0.62315	CA-CN
Stx6	1162.95	0.274461	0.156919	-1.74906	0.0802799	0.371894	CA-CN
Thoc3	547.247	0.274062	0.197881	-1.38499	0.166057	0.53409	CA-CN
Pus1	358.4	0.273991	0.247304	-1.10791	0.267902	0.638308	CA-CN
Pik3ap1	1738.48	0.273865	0.163901	-1.67091	0.0947388	0.404359	CA-CN
Zdhhc21	2035.95	0.273585	0.14326	-1.90971	0.0561711	0.304415	CA-CN
Tpi1	2408.47	0.273496	0.136278	-2.00689	0.0447611	0.270607	CA-CN
Zbtb11os1	269.437	0.272841	0.284121	-0.960297	0.336906	0.697455	CA-CN
Bcl11a	855.098	0.272762	0.181072	-1.50638	0.13197	0.475717	CA-CN
Fam78a	1567.23	0.272511	0.17481	-1.55889	0.119022	0.452649	CA-CN
Chmp1a	2492.26	0.27251	0.140841	-1.93488	0.0530052	0.296223	CA-CN
Apool	260.811	0.272436	0.263703	-1.03312	0.301549	0.664736	CA-CN
Aarsd1	248.957	0.272408	0.270667	-1.00643	0.314208	0.677226	CA-CN
Tnpo2	1564.95	0.272401	0.150115	-1.81462	0.069583	0.341332	CA-CN
Psph	210.002	0.272238	0.297327	-0.915618	0.359867	0.710816	CA-CN
Slc17a5	894.01	0.27222	0.171707	-1.58538	0.11288	0.439397	CA-CN
Izumo4	154.341	0.271614	0.360536	-0.753361	0.451233	0.773182	CA-CN
Os9	4171.28	0.271256	0.130071	-2.08545	0.0370287	0.240004	CA-CN
Etv3	1634.74	0.271156	0.158999	-1.7054	0.0881199	0.38866	CA-CN
Apmap	677.306	0.270841	0.186599	-1.45146	0.146652	0.500547	CA-CN
Pradc1	148.014	0.270614	0.340196	-0.795465	0.426343	0.757454	CA-CN
Zfp362	944.572	0.270569	0.173786	-1.55691	0.119492	0.453576	CA-CN
Plekha3	881.188	0.270384	0.206838	-1.30722	0.191137	0.564891	CA-CN
Plcg2	9365.92	0.270306	0.13069	-2.0683	0.0386114	0.247095	CA-CN
Sord	975.339	0.270139	0.18243	-1.48078	0.138665	0.487678	CA-CN
Heatr5b	958.074	0.269926	0.164754	-1.63835	0.101348	0.416356	CA-CN
Snx15	508.859	0.269733	0.211067	-1.27795	0.201268	0.577384	CA-CN
Anxa11	1096.54	0.269674	0.173502	-1.5543	0.120113	0.454868	CA-CN
Hadh	988.174	0.269664	0.169123	-1.59448	0.110828	0.437523	CA-CN
Psmg3	314.741	0.269538	0.272406	-0.989472	0.322432	0.684375	CA-CN
Tmc6	2523.76	0.269511	0.136317	-1.97709	0.0480311	0.281131	CA-CN
Myh9	19965.4	0.269429	0.140292	-1.92048	0.0547974	0.300753	CA-CN
Exoc7	654.438	0.26941	0.19227	-1.4012	0.161153	0.525844	CA-CN
Wdr46	802.867	0.269327	0.181436	-1.48442	0.137697	0.48626	CA-CN
Armc7	957.856	0.269264	0.175873	-1.53102	0.125765	0.463892	CA-CN
Aldh4a1	519.345	0.269248	0.204001	-1.31984	0.186889	0.559078	CA-CN
Isoc2a	636.805	0.269165	0.211188	-1.27453	0.202476	0.578562	CA-CN
Marveld1	946.968	0.268894	0.164637	-1.63326	0.102414	0.41967	CA-CN
Hectd3	1790.68	0.268859	0.14319	-1.87764	0.0604306	0.315981	CA-CN
Dram2	2460.18	0.268847	0.134672	-1.99631	0.0459003	0.273677	CA-CN
Atp2a3	4105.92	0.268661	0.130579	-2.05747	0.0396411	0.251495	CA-CN
Golm1	806.185	0.268615	0.199316	-1.34768	0.177761	0.547517	CA-CN
Bola3	91.857	0.267428	0.445135	-0.60078	0.547987	0.824529	CA-CN
Mthfd2	656.587	0.267343	0.19442	-1.37508	0.169106	0.537012	CA-CN
Pigt	2317.52	0.267239	0.155994	-1.71314	0.0866867	0.385706	CA-CN
Patz1	603.896	0.266987	0.201412	-1.32558	0.184979	0.556092	CA-CN
Pdlim4	194.854	0.266634	0.330853	-0.805897	0.420302	0.754027	CA-CN
Hinfp	374.801	0.266538	0.233785	-1.1401	0.254245	0.626613	CA-CN
Pdik1l	654.604	0.266483	0.187487	-1.42134	0.155218	0.517455	CA-CN
Ip6k3	511.014	0.266311	0.217326	-1.2254	0.220426	0.598531	CA-CN
Dhps	487.907	0.266246	0.20972	-1.26953	0.204253	0.580534	CA-CN
Smpd1	645.544	0.266096	0.216704	-1.22793	0.219474	0.597446	CA-CN
Poldip3	3480.98	0.265878	0.130926	-2.03075	0.0422806	0.261788	CA-CN
Pkm	14628	0.265832	0.120219	-2.21122	0.0270204	0.201519	CA-CN
H2-Q2	963.807	0.265785	0.224929	-1.18164	0.23735	0.613785	CA-CN
Pygo2	2678.99	0.265624	0.13196	-2.01291	0.0441241	0.268159	CA-CN
Zfp768	254.76	0.265425	0.275042	-0.965033	0.334528	0.695272	CA-CN
Mrs2	641.363	0.265332	0.189155	-1.40272	0.160699	0.524739	CA-CN
Pard6a	167.007	0.265321	0.35809	-0.740933	0.458734	0.775486	CA-CN
Abl1	3845.37	0.265275	0.124867	-2.12445	0.0336323	0.229967	CA-CN
Drosha	490.141	0.264942	0.209786	-1.26292	0.206619	0.583278	CA-CN
Cotl1	19237.2	0.264655	0.125457	-2.10952	0.0348993	0.233955	CA-CN
Cpped1	407.874	0.264328	0.238785	-1.10697	0.268307	0.639087	CA-CN
Mocs1	3123.17	0.264234	0.131783	-2.00506	0.0449567	0.270979	CA-CN
Ppfia1	1106.47	0.264183	0.160569	-1.64529	0.0999095	0.412902	CA-CN
Wbp11	1805.69	0.264132	0.166553	-1.58587	0.112768	0.439397	CA-CN
Mroh1	1703.04	0.264053	0.152666	-1.72961	0.0836998	0.380544	CA-CN
Cdk5rap3	966.199	0.2638	0.165398	-1.59494	0.110726	0.437334	CA-CN
Rprd2	1583.82	0.263708	0.148742	-1.77293	0.0762411	0.359814	CA-CN
Iars2	905.249	0.263707	0.179985	-1.46516	0.142877	0.494324	CA-CN
Dock8	10212.8	0.263339	0.126792	-2.07694	0.0378068	0.243875	CA-CN
Gm20544	317.553	0.263178	0.262464	-1.00272	0.315996	0.679259	CA-CN
Arhgap17	4245.05	0.262615	0.159537	-1.64611	0.0997418	0.412902	CA-CN
2700062C07Rik	167.275	0.262607	0.325009	-0.807997	0.419092	0.753927	CA-CN
Tagap	831.504	0.262441	0.18503	-1.41837	0.156084	0.518778	CA-CN
Slc9a8	1041.46	0.26243	0.164973	-1.59074	0.111667	0.43835	CA-CN
Tmem256	1262.34	0.262418	0.156764	-1.67397	0.0941356	0.403296	CA-CN
Dock4	1404.38	0.262313	0.150425	-1.74381	0.0811924	0.373799	CA-CN
Josd2	381.404	0.262073	0.226251	-1.15833	0.24673	0.622908	CA-CN
Fundc1	1442.81	0.261759	0.15701	-1.66714	0.0954856	0.405581	CA-CN
Tnrc6b	3158.76	0.26167	0.175686	-1.48941	0.136378	0.484694	CA-CN
Syngr2	7614.78	0.261635	0.127107	-2.05839	0.0395529	0.251133	CA-CN
Heatr6	994.045	0.261434	0.162955	-1.60434	0.10864	0.434613	CA-CN
Dot1l	1290.62	0.261226	0.187735	-1.39146	0.164085	0.530583	CA-CN
Lztfl1	1042.38	0.260862	0.191298	-1.36364	0.172681	0.542653	CA-CN
Ncln	3624.72	0.26049	0.130044	-2.00308	0.0451682	0.271647	CA-CN
Cbr3	379.28	0.260436	0.226948	-1.14756	0.251151	0.625549	CA-CN
Kmo	810.164	0.26042	0.20673	-1.25971	0.207773	0.585338	CA-CN
Foxj3	675.758	0.260337	0.1886	-1.38036	0.167476	0.53577	CA-CN
Mdh2	2752.91	0.260306	0.133512	-1.94968	0.051214	0.29092	CA-CN
Impad1	1239.72	0.260054	0.162709	-1.59828	0.109981	0.436025	CA-CN
Scand1	3566.84	0.259906	0.163145	-1.5931	0.111138	0.437881	CA-CN
Pilra	2623.5	0.259871	0.164373	-1.58098	0.113883	0.4414	CA-CN
Eml2	301.064	0.259784	0.25639	-1.01324	0.310947	0.673969	CA-CN
Rpain	362.206	0.259754	0.241703	-1.07469	0.282515	0.65174	CA-CN
Arl3	164.881	0.25974	0.378454	-0.686318	0.492512	0.792665	CA-CN
Tnfaip3	1286.83	0.259515	0.172144	-1.50755	0.13167	0.475483	CA-CN
Vps18	1156.56	0.259138	0.155876	-1.66247	0.0964194	0.406721	CA-CN
Ddb1	3523.79	0.258947	0.134861	-1.92011	0.0548443	0.30077	CA-CN
Pla2g7	18461.2	0.258929	0.117987	-2.19455	0.0281962	0.206969	CA-CN
Mospd1	406.589	0.258876	0.256744	-1.0083	0.313309	0.676859	CA-CN
Hk1	1730	0.258865	0.16086	-1.60925	0.107561	0.433778	CA-CN
Timm13	740.047	0.258846	0.192118	-1.34733	0.177875	0.547517	CA-CN
Tpd52	14310.3	0.258823	0.113487	-2.28064	0.0225695	0.181476	CA-CN
Zmat5	310.262	0.258812	0.250608	-1.03274	0.301726	0.66485	CA-CN
Vars	1406.1	0.258811	0.160149	-1.61607	0.10608	0.430643	CA-CN
Tmco4	480.512	0.258697	0.221564	-1.16759	0.242971	0.619817	CA-CN
Tmc8	1149.96	0.258676	0.222539	-1.16239	0.245078	0.621792	CA-CN
Clasp1	1049.14	0.258559	0.161735	-1.59866	0.109897	0.436025	CA-CN
Mbtps1	2187.46	0.257785	0.135799	-1.89827	0.0576599	0.309031	CA-CN
Taf2	993.942	0.257521	0.164424	-1.56621	0.117301	0.449051	CA-CN
Wipf2	1431.37	0.257187	0.149928	-1.7154	0.0862717	0.384492	CA-CN
Matk	629.683	0.257051	0.187166	-1.37339	0.169632	0.537511	CA-CN
Rcan1	560.852	0.257004	0.211227	-1.21672	0.22371	0.601934	CA-CN
Dph6	382.82	0.25694	0.225482	-1.13952	0.254488	0.626613	CA-CN
Ufsp2	1189.35	0.256887	0.155885	-1.64793	0.0993679	0.412902	CA-CN
Lonp1	820.495	0.256739	0.204181	-1.25741	0.208606	0.586315	CA-CN
Fam32a	5737.44	0.256617	0.118479	-2.16592	0.0303174	0.21645	CA-CN
Pex7	468.518	0.256528	0.22039	-1.16398	0.244434	0.621382	CA-CN
Nr2c2	2792.24	0.256368	0.137816	-1.86022	0.062855	0.322444	CA-CN
Myof	3913.09	0.25629	0.138151	-1.85515	0.0635751	0.323287	CA-CN
Anapc5	3266.63	0.256185	0.132771	-1.92953	0.0536654	0.29794	CA-CN
Prdx2	1578.5	0.255952	0.158904	-1.61074	0.107237	0.433503	CA-CN
D17H6S53E	463.818	0.255499	0.221028	-1.15596	0.247699	0.62315	CA-CN
Abca2	1584.95	0.255498	0.168232	-1.51872	0.128833	0.470911	CA-CN
Gnpda1	548.236	0.255422	0.211611	-1.20704	0.227417	0.605615	CA-CN
Tbc1d9	2686.25	0.255249	0.136624	-1.86826	0.0617264	0.319657	CA-CN
Fcgr1	2141.19	0.255096	0.173016	-1.47441	0.140371	0.489734	CA-CN
Cc2d1b	986.734	0.255034	0.175612	-1.45226	0.14643	0.500201	CA-CN
Lpcat1	743.901	0.254991	0.200262	-1.27328	0.202917	0.579181	CA-CN
Gtf2h4	221.113	0.254866	0.294815	-0.864495	0.387316	0.731155	CA-CN
Desi2	1063.79	0.254742	0.170616	-1.49307	0.135418	0.482341	CA-CN
Tcn2	4208.52	0.254706	0.137023	-1.85886	0.0630474	0.322575	CA-CN
Polr3c	1321.7	0.25439	0.151161	-1.68291	0.0923925	0.399019	CA-CN
Emc2	905.618	0.254386	0.17137	-1.48442	0.137698	0.48626	CA-CN
Kif1c	2290.61	0.25433	0.150584	-1.68895	0.0912287	0.395716	CA-CN
2610507B11Rik	5275.98	0.254308	0.121551	-2.09219	0.0364216	0.237976	CA-CN
Rexo1	2956.09	0.254269	0.144534	-1.75924	0.0785373	0.366371	CA-CN
Gusb	5029.01	0.254139	0.120163	-2.11496	0.0344333	0.233368	CA-CN
Gss	423.521	0.254091	0.2196	-1.15706	0.247247	0.62315	CA-CN
Hck	9767.59	0.253796	0.125826	-2.01703	0.043692	0.266333	CA-CN
Msantd3	317.089	0.253669	0.304261	-0.833723	0.404437	0.74428	CA-CN
Atxn10	1285.32	0.253617	0.161261	-1.57271	0.115785	0.445568	CA-CN
Bak1	3799.44	0.253545	0.131939	-1.92169	0.054645	0.300492	CA-CN
Itgb7	7722.56	0.253503	0.126374	-2.00597	0.044859	0.270979	CA-CN
Sars2	335.452	0.253301	0.238097	-1.06386	0.287393	0.654389	CA-CN
Pdcd2l	566.471	0.253188	0.195378	-1.29589	0.195014	0.568661	CA-CN
Acads	628.89	0.253169	0.191431	-1.32251	0.185999	0.55782	CA-CN
Eml3	1794.54	0.253116	0.155157	-1.63135	0.102816	0.42089	CA-CN
Litaf	3912.61	0.252856	0.13731	-1.8415	0.0655489	0.329193	CA-CN
Cdt1	526.537	0.252797	0.204925	-1.23361	0.217349	0.596038	CA-CN
Tmem135	1095.7	0.25278	0.163873	-1.54253	0.122945	0.459983	CA-CN
Hsdl1	1186.8	0.252775	0.184118	-1.37289	0.169785	0.537511	CA-CN
Rab11fip1	1441.42	0.25262	0.163298	-1.54698	0.121867	0.458079	CA-CN
Bola2	648.865	0.252602	0.191175	-1.32131	0.186397	0.558225	CA-CN
Kdm6b	5256.47	0.252453	0.127633	-1.97795	0.047934	0.281131	CA-CN
Cog7	493.114	0.252369	0.212364	-1.18838	0.234684	0.61271	CA-CN
Rnh1	4431.42	0.251947	0.125652	-2.00512	0.04495	0.270979	CA-CN
Zfp646	1590.21	0.251743	0.147888	-1.70226	0.0887067	0.390609	CA-CN
Gm15787	213.18	0.25153	0.292348	-0.860378	0.389581	0.732443	CA-CN
Atg5	1400.44	0.251487	0.148641	-1.6919	0.0906647	0.39519	CA-CN
5031439G07Rik	6643.63	0.251407	0.129042	-1.94826	0.0513844	0.291274	CA-CN
Tnk1	752.971	0.251259	0.236521	-1.06231	0.288095	0.65479	CA-CN
Ech1	1354.95	0.251146	0.15256	-1.64622	0.0997193	0.412902	CA-CN
Gm5150	2386.82	0.251063	0.134492	-1.86675	0.0619371	0.320134	CA-CN
Prkra	992.661	0.251014	0.185066	-1.35635	0.174987	0.543751	CA-CN
Tlr4	1573.85	0.250997	0.15616	-1.60731	0.107986	0.433898	CA-CN
Utp18	611.158	0.250742	0.200601	-1.24995	0.211316	0.589671	CA-CN
Dtx2	675.584	0.250619	0.225822	-1.10981	0.267081	0.637576	CA-CN
Mief1	960.844	0.250567	0.171593	-1.46024	0.144225	0.496089	CA-CN
Vac14	1347.28	0.250452	0.180818	-1.38511	0.16602	0.53409	CA-CN
Dnmt1	1460.03	0.250265	0.171981	-1.45519	0.145618	0.498055	CA-CN
Dirc2	1047	0.250088	0.176854	-1.41409	0.157335	0.520966	CA-CN
S1pr4	315.107	0.249869	0.252127	-0.991043	0.321664	0.683484	CA-CN
Pef1	1065.15	0.249704	0.170622	-1.4635	0.143332	0.495263	CA-CN
Nrm	1014.09	0.249658	0.16697	-1.49522	0.134857	0.481826	CA-CN
Ptrhd1	460.158	0.249611	0.218998	-1.13979	0.254375	0.626613	CA-CN
Timm10b	1838.77	0.24956	0.141805	-1.75988	0.0784279	0.366072	CA-CN
Vps36	874.998	0.249279	0.170034	-1.46605	0.142634	0.493906	CA-CN
Hat1	463.392	0.249258	0.229778	-1.08478	0.27802	0.648099	CA-CN
Slc39a11	855.106	0.249228	0.170989	-1.45757	0.144959	0.496682	CA-CN
Nipal3	667.375	0.24909	0.205919	-1.20965	0.226413	0.604839	CA-CN
Slc35f5	645.793	0.248951	0.192844	-1.29095	0.196722	0.571543	CA-CN
Supt6	2353.48	0.248749	0.154708	-1.60787	0.107864	0.433898	CA-CN
Tmem123	4403.33	0.248398	0.129457	-1.91877	0.0550139	0.301291	CA-CN
Narf	1706.12	0.248368	0.161333	-1.53948	0.123687	0.460504	CA-CN
Notch2	11311	0.248319	0.120273	-2.06464	0.0389575	0.248327	CA-CN
Manba	1065.31	0.248261	0.168107	-1.4768	0.139728	0.489078	CA-CN
Zswim4	1445.74	0.247895	0.16031	-1.54634	0.122022	0.458236	CA-CN
1110059E24Rik	435.735	0.247846	0.222525	-1.11379	0.26537	0.636232	CA-CN
Dhrs1	1536.69	0.247725	0.168056	-1.47406	0.140464	0.489748	CA-CN
Znrd1	807.818	0.247696	0.185444	-1.33569	0.18165	0.551819	CA-CN
Arhgap27	2898.12	0.247234	0.163951	-1.50797	0.131561	0.475388	CA-CN
Tm7sf3	906.043	0.247147	0.167224	-1.47794	0.139425	0.488847	CA-CN
Dusp28	164.091	0.247093	0.320592	-0.770741	0.44086	0.765878	CA-CN
Chmp6	692.611	0.246961	0.201249	-1.22714	0.219769	0.597659	CA-CN
Hcfc1	5018.49	0.246879	0.135075	-1.82771	0.067593	0.335641	CA-CN
Cxcr4	5015.92	0.246818	0.125444	-1.96757	0.049118	0.284203	CA-CN
Cul2	717.054	0.246793	0.211507	-1.16683	0.243277	0.619996	CA-CN
Twf1	1691.01	0.246222	0.144079	-1.70894	0.0874628	0.387876	CA-CN
Leng1	562.691	0.246195	0.200973	-1.22501	0.22057	0.598685	CA-CN
Fdxr	349.81	0.246149	0.25304	-0.972765	0.33067	0.691518	CA-CN
Cnot9	876.547	0.24611	0.184437	-1.33439	0.182076	0.551819	CA-CN
Bloc1s1	987.645	0.245959	0.169991	-1.4469	0.147926	0.503395	CA-CN
Fam53c	2068.8	0.245603	0.139878	-1.75585	0.0791148	0.368189	CA-CN
Ppp1ca	9427.45	0.245406	0.116052	-2.11462	0.0344625	0.233368	CA-CN
Shisa5	15069.2	0.245362	0.118231	-2.07528	0.037961	0.244405	CA-CN
Ifitm2	14360.9	0.245307	0.112259	-2.18519	0.0288749	0.209273	CA-CN
Tob2	2591.58	0.245221	0.147258	-1.66525	0.0958635	0.406202	CA-CN
Trak1	1644.35	0.245012	0.146603	-1.67126	0.0946695	0.40432	CA-CN
Nudt8	167.098	0.244992	0.328293	-0.746259	0.455511	0.775083	CA-CN
Gpatch8	1617.39	0.24478	0.152563	-1.60445	0.108614	0.434613	CA-CN
Trmt10c	448.72	0.244641	0.218707	-1.11858	0.263321	0.634594	CA-CN
Cetn2	512.055	0.244631	0.214735	-1.13922	0.25461	0.626613	CA-CN
Iqsec1	1354.75	0.244585	0.165288	-1.47975	0.138941	0.488331	CA-CN
Crtap	239.662	0.244525	0.280144	-0.872854	0.382743	0.727959	CA-CN
Rnf187	3012.04	0.244435	0.14908	-1.63962	0.101084	0.415695	CA-CN
Ccr2	57662.8	0.244366	0.159509	-1.53199	0.125525	0.463218	CA-CN
Tfdp1	823.689	0.244227	0.184693	-1.32234	0.186055	0.55782	CA-CN
Gfm1	508.16	0.244211	0.219312	-1.11353	0.265481	0.636232	CA-CN
Zkscan6	410.835	0.244173	0.238237	-1.02492	0.305402	0.668019	CA-CN
Rprd1b	1053.78	0.24415	0.160836	-1.51801	0.129011	0.471128	CA-CN
Rrbp1	6111.38	0.244012	0.131527	-1.85523	0.0635637	0.323287	CA-CN
Nudt16l1	974.52	0.243815	0.179598	-1.35756	0.174604	0.543219	CA-CN
Hivep1	1789.48	0.243676	0.161997	-1.5042	0.132531	0.476653	CA-CN
Afdn	1224.62	0.243551	0.194197	-1.25414	0.20979	0.587159	CA-CN
Arhgdib	22506	0.24352	0.12166	-2.00165	0.0453226	0.272046	CA-CN
Timm8b	401.755	0.243398	0.231861	-1.04976	0.293829	0.658207	CA-CN
Fundc2	479.324	0.243297	0.213485	-1.13964	0.254435	0.626613	CA-CN
Chd4	6324.41	0.243254	0.121676	-1.99919	0.0455878	0.272953	CA-CN
Osbpl7	539.261	0.243156	0.198822	-1.22299	0.221335	0.598989	CA-CN
Wipf1	9712.96	0.243069	0.140112	-1.73482	0.0827731	0.378278	CA-CN
Rida	89.0217	0.242771	0.432453	-0.561381	0.574538	0.838761	CA-CN
Apba3	864.154	0.242637	0.173502	-1.39847	0.161973	0.52711	CA-CN
Pianp	322.391	0.242479	0.298985	-0.811007	0.417361	0.752643	CA-CN
Ergic3	1615.32	0.242191	0.146436	-1.6539	0.0981478	0.410293	CA-CN
Tkt	6314.98	0.242176	0.117161	-2.06704	0.0387301	0.247658	CA-CN
Pink1	1619.33	0.24199	0.182912	-1.32299	0.185839	0.557585	CA-CN
Dohh	715.616	0.241958	0.191504	-1.26346	0.206424	0.583278	CA-CN
Svil	4971.41	0.241856	0.123306	-1.96142	0.0498296	0.286884	CA-CN
Usp6nl	729.54	0.241706	0.178805	-1.35179	0.176444	0.545746	CA-CN
Tma7	142.008	0.241659	0.347291	-0.69584	0.486529	0.791587	CA-CN
Tada2b	571.675	0.241416	0.202102	-1.19453	0.232272	0.611319	CA-CN
Hcls1	7265.48	0.24139	0.142129	-1.69838	0.0894363	0.391902	CA-CN
Tor2a	1206.51	0.241373	0.167856	-1.43798	0.15044	0.507893	CA-CN
Mtap	498.704	0.241196	0.212892	-1.13295	0.257235	0.629964	CA-CN
S100a1	533.875	0.241084	0.2041	-1.1812	0.237522	0.61379	CA-CN
Mrpl50	481.769	0.240984	0.210527	-1.14467	0.252345	0.625598	CA-CN
Sptlc2	4881.86	0.240969	0.123483	-1.95144	0.0510048	0.289935	CA-CN
Nudt5	243.862	0.240773	0.273523	-0.880264	0.378716	0.725417	CA-CN
Tmed10	5664.57	0.240716	0.128974	-1.8664	0.0619857	0.32018	CA-CN
Zmiz2	5446.56	0.240304	0.148262	-1.6208	0.10506	0.427481	CA-CN
Rubcnl	807.121	0.240106	0.184607	-1.30063	0.193385	0.566686	CA-CN
Rhbdf2	2651.73	0.239666	0.149762	-1.60031	0.109529	0.436013	CA-CN
Elac2	453.754	0.239393	0.212706	-1.12546	0.260393	0.633178	CA-CN
Fip1l1	894.339	0.239268	0.169138	-1.41463	0.157176	0.520966	CA-CN
Fam26f	781.514	0.239162	0.760065	-0.31466	0.75302	0.92031	CA-CN
Ifi30	13383	0.23879	0.11342	-2.10536	0.0352601	0.234748	CA-CN
Zfp119a	230.664	0.238606	0.320425	-0.744653	0.456481	0.775122	CA-CN
Phb2	2054.75	0.238596	0.139141	-1.71478	0.0863864	0.38479	CA-CN
Mrpl28	742.72	0.23843	0.185945	-1.28226	0.199751	0.574603	CA-CN
Rmnd5b	1084.56	0.238128	0.168029	-1.41719	0.156428	0.519464	CA-CN
Clp1	573.839	0.23812	0.196096	-1.2143	0.224631	0.603268	CA-CN
Aldh2	10007.9	0.238042	0.142519	-1.67024	0.0948712	0.404541	CA-CN
Sap30bp	689.181	0.238006	0.192751	-1.23479	0.216909	0.596038	CA-CN
Bsdc1	1352.04	0.237893	0.151511	-1.57013	0.116384	0.446387	CA-CN
Mtus1	8210.92	0.237819	0.121401	-1.95895	0.0501189	0.287125	CA-CN
Cwc27	229.083	0.237402	0.317136	-0.748579	0.454111	0.774469	CA-CN
Ctnnbl1	834.631	0.237309	0.177221	-1.33905	0.180553	0.550501	CA-CN
Nudt19	502.724	0.237045	0.203854	-1.16282	0.244904	0.621792	CA-CN
Psmd6	1439.96	0.236859	0.153055	-1.54755	0.121731	0.457837	CA-CN
Phf8	1709.16	0.236654	0.152805	-1.54873	0.121447	0.457411	CA-CN
Ep400	2806.49	0.236461	0.132258	-1.78787	0.0737962	0.352384	CA-CN
Stx8	560.097	0.236387	0.210413	-1.12344	0.261249	0.633384	CA-CN
Gns	4061.05	0.236367	0.124166	-1.90364	0.0569569	0.307149	CA-CN
Smap2	4133.44	0.236232	0.128289	-1.84141	0.0655619	0.329193	CA-CN
Ctdnep1	2584.07	0.236062	0.136173	-1.73354	0.0829997	0.378885	CA-CN
Mcrip1	1541.07	0.236041	0.152248	-1.55038	0.121051	0.456708	CA-CN
Rbm15	416.211	0.23604	0.22262	-1.06028	0.289017	0.655328	CA-CN
Ogdh	4654.52	0.235953	0.129879	-1.81671	0.0692617	0.340376	CA-CN
Ndufaf3	351.561	0.23588	0.241086	-0.978404	0.327874	0.688516	CA-CN
Il1b	2209.86	0.235839	0.143419	-1.6444	0.100093	0.413014	CA-CN
Tfam	732.893	0.235837	0.188621	-1.25032	0.211182	0.589671	CA-CN
Renbp	640.23	0.235746	0.1903	-1.23881	0.215415	0.594099	CA-CN
Nop9	976.644	0.235412	0.165219	-1.42485	0.1542	0.515422	CA-CN
Dapk3	541.669	0.235323	0.239556	-0.98233	0.325937	0.687127	CA-CN
Runx3	1106.23	0.235225	0.164744	-1.42782	0.153342	0.513617	CA-CN
Snrpd1	244.308	0.234429	0.314636	-0.745082	0.456222	0.775122	CA-CN
Znrf2	1853.28	0.234399	0.179418	-1.30644	0.191402	0.565086	CA-CN
Mfsd6	2261.94	0.234353	0.147134	-1.59279	0.111208	0.437881	CA-CN
Prkx	3012.98	0.23424	0.149808	-1.5636	0.117911	0.45011	CA-CN
Ndufb10	1325.62	0.234223	0.154103	-1.51991	0.128533	0.47088	CA-CN
Cep44	236.714	0.234102	0.278	-0.842093	0.399736	0.740448	CA-CN
Ipo13	754.952	0.233839	0.178643	-1.30897	0.190544	0.564107	CA-CN
4930430F08Rik	230.673	0.233691	0.295303	-0.791361	0.428733	0.759366	CA-CN
Acsl1	1645.74	0.233672	0.149139	-1.56681	0.11716	0.448937	CA-CN
Dnpep	887.991	0.233566	0.168708	-1.38444	0.166224	0.534156	CA-CN
Maml1	2208.34	0.233473	0.13554	-1.72253	0.0849734	0.381861	CA-CN
Pigo	485.945	0.233342	0.208697	-1.11809	0.263527	0.634594	CA-CN
Hibadh	849.941	0.233262	0.175392	-1.32995	0.183536	0.554215	CA-CN
Wwp2	1727.84	0.23314	0.141777	-1.64442	0.10009	0.413014	CA-CN
Zfp217	4095.88	0.233126	0.128705	-1.81133	0.0700905	0.342369	CA-CN
Mllt6	1348.75	0.233065	0.153212	-1.5212	0.12821	0.470548	CA-CN
Emc8	652.308	0.233036	0.19615	-1.18805	0.234813	0.61271	CA-CN
Zdhhc6	1002.36	0.23269	0.174809	-1.33111	0.183152	0.553424	CA-CN
Tirap	1867.05	0.232574	0.151199	-1.5382	0.124001	0.461168	CA-CN
Hps1	1184.4	0.232384	0.156394	-1.48589	0.137309	0.48626	CA-CN
Ppp2r1a	3645.28	0.232349	0.129846	-1.78942	0.0735467	0.351811	CA-CN
Add1	2660.07	0.232335	0.132894	-1.74827	0.0804171	0.372136	CA-CN
Atg2a	1613.33	0.231827	0.146398	-1.58354	0.113299	0.43998	CA-CN
Rnf10	5992.25	0.231782	0.122296	-1.89525	0.0580593	0.309382	CA-CN
Grb2	5188.19	0.231707	0.12801	-1.81007	0.0702849	0.342904	CA-CN
Tnip1	2224.73	0.231559	0.135421	-1.70991	0.0872817	0.387498	CA-CN
Fubp3	667.525	0.231108	0.188714	-1.22465	0.220708	0.598685	CA-CN
Manbal	468.361	0.231094	0.241689	-0.956159	0.338992	0.698269	CA-CN
Gpx3	368.494	0.230636	0.287511	-0.80218	0.422449	0.754982	CA-CN
Nme1	996.138	0.230397	0.178835	-1.28832	0.197634	0.572176	CA-CN
Hvcn1	483.594	0.230391	0.210327	-1.09539	0.273345	0.643132	CA-CN
Psmd9	402.65	0.230378	0.220483	-1.04488	0.296079	0.660321	CA-CN
Wdfy4	4326.29	0.230338	0.127049	-1.81298	0.0698342	0.341942	CA-CN
Slc35b4	1104.13	0.230171	0.170838	-1.34731	0.17788	0.547517	CA-CN
Atg2b	1139.43	0.230149	0.182246	-1.26284	0.206645	0.583278	CA-CN
Alkbh5	3046.44	0.230112	0.1301	-1.76873	0.0769397	0.362051	CA-CN
Slc25a44	1398.93	0.230012	0.151563	-1.5176	0.129116	0.471128	CA-CN
Cnot3	1820.6	0.229988	0.160091	-1.43661	0.150827	0.508775	CA-CN
Heatr5a	2895.57	0.229915	0.13708	-1.67723	0.0934967	0.40143	CA-CN
Slc33a1	943.001	0.229835	0.189684	-1.21167	0.225637	0.604121	CA-CN
Eftud2	1550.77	0.229595	0.165762	-1.38509	0.166026	0.53409	CA-CN
Cyfip1	5034.75	0.229487	0.125542	-1.82798	0.0675531	0.335641	CA-CN
Poc1b	425.023	0.229391	0.221428	-1.03596	0.300222	0.663089	CA-CN
Stx18	707.007	0.229339	0.192373	-1.19216	0.233199	0.611543	CA-CN
Snf8	683.719	0.228975	0.185771	-1.23256	0.217739	0.596038	CA-CN
Fech	1178.56	0.228967	0.15615	-1.46632	0.14256	0.493893	CA-CN
Gfer	444.781	0.228764	0.215004	-1.064	0.287329	0.654389	CA-CN
Nepro	737.728	0.228475	0.19396	-1.17795	0.238818	0.615811	CA-CN
Hipk2	587.967	0.228167	0.195816	-1.16521	0.243933	0.620691	CA-CN
Tmem129	364.33	0.227757	0.243484	-0.93541	0.349577	0.704414	CA-CN
Lpcat3	1194.07	0.227711	0.156749	-1.45271	0.146303	0.500078	CA-CN
Rabl6	1615.99	0.227583	0.146033	-1.55843	0.119131	0.452649	CA-CN
Cstb	1785.94	0.227479	0.141928	-1.60278	0.108984	0.435267	CA-CN
Wdfy3	2882.79	0.227433	0.134493	-1.69104	0.0908287	0.395527	CA-CN
Nfkbia	6074.48	0.22741	0.11836	-1.92134	0.0546885	0.300526	CA-CN
Nubp2	1395.93	0.22741	0.150814	-1.50788	0.131585	0.475388	CA-CN
Eif3b	2475.1	0.227317	0.14067	-1.61596	0.106104	0.430643	CA-CN
Mocs3	299.095	0.227081	0.257129	-0.883141	0.37716	0.723979	CA-CN
Id1	453.356	0.227056	0.21685	-1.04707	0.295068	0.659782	CA-CN
Fam219a	254.573	0.227051	0.283879	-0.799817	0.423817	0.756225	CA-CN
Prpf19	1703.91	0.226994	0.152794	-1.48562	0.13738	0.48626	CA-CN
Apba1	2325.11	0.226983	0.155399	-1.46065	0.144111	0.496089	CA-CN
Dlat	856.633	0.226898	0.175631	-1.2919	0.196391	0.571029	CA-CN
Ptpn11	3183.16	0.226768	0.153806	-1.47438	0.14038	0.489734	CA-CN
Psmb9	1842.77	0.226743	0.50215	-0.451545	0.651597	0.873436	CA-CN
Gbp5	1045.14	0.226741	0.58303	-0.388902	0.697349	0.898367	CA-CN
Slc9a1	2124.66	0.226525	0.157768	-1.43581	0.151057	0.509124	CA-CN
Nub1	2152.56	0.22648	0.155457	-1.45686	0.145155	0.497103	CA-CN
Mrps31	239.114	0.226328	0.272617	-0.830205	0.406423	0.745646	CA-CN
Cyp4f16	3398.08	0.226301	0.126648	-1.78685	0.0739613	0.352548	CA-CN
Orc2	459.152	0.226166	0.214654	-1.05363	0.292052	0.657737	CA-CN
Hnrnpul1	6635.61	0.226088	0.137259	-1.64716	0.0995261	0.412902	CA-CN
Tnrc6c	1591.74	0.226085	0.145775	-1.55092	0.120922	0.456433	CA-CN
Bcl2l13	1501.63	0.225834	0.146616	-1.54031	0.123485	0.460504	CA-CN
Pnkp	2219.92	0.225796	0.148177	-1.52383	0.127552	0.469067	CA-CN
Dcaf5	926.222	0.225694	0.169321	-1.33294	0.182553	0.552101	CA-CN
Exosc2	231.486	0.225341	0.282408	-0.797927	0.424913	0.757378	CA-CN
Rnf185	631.736	0.225138	0.196388	-1.1464	0.251631	0.625549	CA-CN
Pmf1	255.724	0.225009	0.331554	-0.678651	0.497359	0.795911	CA-CN
Usp5	1709.56	0.224983	0.143721	-1.56542	0.117485	0.449542	CA-CN
Rab22a	786.383	0.22491	0.198143	-1.13509	0.256339	0.628912	CA-CN
Fgd3	1693.95	0.22485	0.183247	-1.22704	0.219809	0.597659	CA-CN
Mrps18c	336.676	0.22483	0.255383	-0.880364	0.378662	0.725417	CA-CN
Aven	239.374	0.224745	0.278862	-0.805935	0.42028	0.754027	CA-CN
Grsf1	2094.06	0.224668	0.149923	-1.49855	0.133989	0.479574	CA-CN
Lzic	370.057	0.224575	0.262397	-0.855859	0.392076	0.734336	CA-CN
Sirpb1a	4464.91	0.224493	0.152477	-1.47231	0.140937	0.490762	CA-CN
Sumf1	1753.4	0.224439	0.16139	-1.39066	0.164328	0.530851	CA-CN
Slc35e1	2555.66	0.224357	0.138326	-1.62194	0.104816	0.426701	CA-CN
Dera	1106.73	0.224272	0.17212	-1.30299	0.192577	0.56584	CA-CN
Rbm45	516.535	0.224013	0.208334	-1.07526	0.282259	0.65174	CA-CN
Lrwd1	1438.09	0.223753	0.148372	-1.50806	0.13154	0.475388	CA-CN
Ap3m2	605.532	0.22371	0.191824	-1.16623	0.243523	0.620038	CA-CN
Gtf2h5	578.888	0.223678	0.230838	-0.968984	0.332553	0.693126	CA-CN
Uqcc3	397.248	0.223569	0.235665	-0.94867	0.342788	0.701438	CA-CN
Lxn	360.516	0.223445	0.248223	-0.900176	0.368027	0.714468	CA-CN
Zfp106	6177.69	0.223406	0.123793	-1.80468	0.071125	0.346141	CA-CN
Ring1	320.338	0.22325	0.241865	-0.923036	0.355989	0.707746	CA-CN
Nup50	1127.8	0.22301	0.169716	-1.31402	0.18884	0.562832	CA-CN
Nt5c	1458.88	0.222992	0.151031	-1.47647	0.139818	0.489183	CA-CN
Mrps35	328.324	0.222954	0.264592	-0.842631	0.399435	0.740448	CA-CN
Bmt2	1185.27	0.222924	0.199439	-1.11775	0.263672	0.634594	CA-CN
Selenoo	687.962	0.222827	0.182189	-1.22305	0.22131	0.598989	CA-CN
Nfkb1	8261.21	0.222709	0.132532	-1.68041	0.0928768	0.39983	CA-CN
Borcs8	1282	0.222676	0.154498	-1.44129	0.149503	0.506631	CA-CN
Tacc1	7629.41	0.222661	0.119906	-1.85696	0.0633169	0.322932	CA-CN
Tmem173	4445.66	0.22256	0.12243	-1.81785	0.0690872	0.339931	CA-CN
Stat5a	1684.95	0.222554	0.151871	-1.46541	0.142808	0.494298	CA-CN
Dbt	538.888	0.222523	0.206791	-1.07607	0.281894	0.651684	CA-CN
Dbnl	5166.35	0.222267	0.127504	-1.74322	0.0812946	0.373844	CA-CN
Lrrc47	1196.6	0.222246	0.161769	-1.37385	0.169489	0.537511	CA-CN
Ripk3	831.913	0.222021	0.201346	-1.10268	0.270165	0.639743	CA-CN
Pde4dip	1350.96	0.221914	0.161567	-1.37351	0.169594	0.537511	CA-CN
Zkscan17	504.477	0.221827	0.207933	-1.06682	0.286053	0.653991	CA-CN
4833439L19Rik	1926.59	0.221404	0.139152	-1.59109	0.111589	0.43835	CA-CN
Dstn	3973.42	0.221049	0.139054	-1.58966	0.111911	0.439014	CA-CN
Tmem19	1132.23	0.220995	0.174431	-1.26694	0.205175	0.582133	CA-CN
Gtpbp3	365.411	0.220788	0.23085	-0.956411	0.338865	0.698269	CA-CN
Arhgap30	16087.5	0.220562	0.113887	-1.93668	0.0527841	0.295481	CA-CN
Adap1	4751.23	0.220559	0.136707	-1.61337	0.106664	0.432051	CA-CN
Myo1f	19801.8	0.220525	0.112943	-1.95253	0.0508755	0.289652	CA-CN
Kctd20	5231.15	0.220378	0.122623	-1.7972	0.0723034	0.348529	CA-CN
Prpsap1	1220.73	0.220239	0.154349	-1.42689	0.153611	0.514092	CA-CN
Dhx16	1509.07	0.219939	0.161865	-1.35878	0.174217	0.54287	CA-CN
Arpc4	9647.05	0.219813	0.118063	-1.86183	0.0626271	0.322054	CA-CN
Ncdn	718.382	0.21954	0.213703	-1.02732	0.304272	0.667188	CA-CN
Togaram1	1033.1	0.21931	0.162408	-1.35036	0.176899	0.545746	CA-CN
Tmem63a	1725.76	0.219117	0.153013	-1.43201	0.152141	0.511287	CA-CN
Tmem134	2135.67	0.219089	0.156629	-1.39878	0.161879	0.52711	CA-CN
Exosc5	789.328	0.218965	0.175482	-1.24779	0.212108	0.590616	CA-CN
Cox6b1	3050.4	0.218905	0.128832	-1.69915	0.0892907	0.3919	CA-CN
Ctdp1	888.221	0.218844	0.203218	-1.07689	0.281527	0.651022	CA-CN
Fastkd1	268.692	0.218522	0.31936	-0.684248	0.493819	0.793901	CA-CN
Tmem106a	3145.36	0.218452	0.158716	-1.37637	0.168708	0.536635	CA-CN
Ppm1h	2782.2	0.218324	0.13281	-1.64388	0.100201	0.413014	CA-CN
Ppp6r1	8246.76	0.218233	0.124617	-1.75123	0.0799056	0.371043	CA-CN
Psma4	1232.9	0.218186	0.159506	-1.36789	0.171347	0.53952	CA-CN
Ubxn6	1191.48	0.218142	0.162561	-1.34191	0.179625	0.549542	CA-CN
Mpp1	5935.95	0.217986	0.155944	-1.39785	0.16216	0.52711	CA-CN
Carm1	1102.52	0.217939	0.186037	-1.17149	0.241403	0.618337	CA-CN
Mettl26	211.234	0.21784	0.287042	-0.758913	0.447905	0.770617	CA-CN
Arhgap1	2502.11	0.217837	0.138549	-1.57228	0.115886	0.445746	CA-CN
Guk1	414.037	0.21723	0.234461	-0.92651	0.354181	0.707399	CA-CN
Cox6a1	2846.75	0.216805	0.136267	-1.59103	0.111602	0.43835	CA-CN
Stard7	1610.78	0.216782	0.156988	-1.38088	0.167315	0.53577	CA-CN
Ctsc	20523.1	0.216748	0.128113	-1.69185	0.0906753	0.39519	CA-CN
Atp6v0a2	2335.01	0.216583	0.140135	-1.54553	0.122218	0.458756	CA-CN
Ap2a2	8027.5	0.216546	0.116634	-1.85662	0.0633651	0.322975	CA-CN
Ptbp1	4643.52	0.216329	0.138561	-1.56126	0.118463	0.451532	CA-CN
Tlr5	403.362	0.216269	0.292248	-0.740019	0.459288	0.775861	CA-CN
Mib1	1593.85	0.216094	0.154541	-1.3983	0.162023	0.52711	CA-CN
Vps26b	2812.59	0.216066	0.135082	-1.59951	0.109707	0.436025	CA-CN
Vps53	746.257	0.216018	0.185758	-1.1629	0.24487	0.621792	CA-CN
Dnajc24	273.707	0.215974	0.277722	-0.777664	0.436767	0.763894	CA-CN
Prdx3	2070.63	0.215919	0.142895	-1.51103	0.130782	0.474226	CA-CN
Fbxl15	243.299	0.215904	0.317226	-0.680598	0.496126	0.795644	CA-CN
Ube2j2	828.338	0.215871	0.184646	-1.16911	0.24236	0.619458	CA-CN
Sdhc	1884.77	0.215828	0.140616	-1.53488	0.124813	0.462702	CA-CN
Fzr1	870.202	0.215695	0.188759	-1.1427	0.253165	0.626613	CA-CN
Zdhhc24	486.111	0.215412	0.228508	-0.942687	0.345841	0.703828	CA-CN
Sfxn1	572.09	0.215281	0.202826	-1.06141	0.288503	0.654983	CA-CN
Plscr3	2736.01	0.214931	0.180901	-1.18811	0.234789	0.61271	CA-CN
Sumo3	1929.4	0.2147	0.142347	-1.50829	0.13148	0.475388	CA-CN
Endog	235.996	0.214695	0.275845	-0.778317	0.436382	0.763551	CA-CN
Sec14l1	4003.42	0.214472	0.132959	-1.61307	0.106729	0.432099	CA-CN
Xpr1	4435.36	0.214331	0.129821	-1.65098	0.0987434	0.411719	CA-CN
Fmo5	639.465	0.21431	0.209469	-1.02311	0.306256	0.668866	CA-CN
Extl3	2043.23	0.214305	0.146791	-1.45994	0.144307	0.496089	CA-CN
Vps37c	982.09	0.214269	0.177766	-1.20534	0.228072	0.605859	CA-CN
Rex1bd	589.126	0.214014	0.20499	-1.04402	0.296476	0.660659	CA-CN
Zer1	1105.86	0.213791	0.183674	-1.16397	0.244435	0.621382	CA-CN
Akr1a1	10826.8	0.213748	0.114609	-1.86503	0.0621779	0.320762	CA-CN
R3hdm1	1436.02	0.213541	0.158798	-1.34473	0.178712	0.548615	CA-CN
Sf3b4	361.845	0.213447	0.240259	-0.888404	0.374323	0.720757	CA-CN
2310011J03Rik	1092.13	0.213393	0.186212	-1.14597	0.251809	0.625549	CA-CN
Rpp25l	452.489	0.213348	0.249345	-0.855633	0.392201	0.734336	CA-CN
Prr12	865.835	0.213234	0.192841	-1.10575	0.268835	0.639403	CA-CN
Entpd7	1528.29	0.213145	0.160647	-1.3268	0.184576	0.555858	CA-CN
Tars2	480.507	0.213045	0.240682	-0.885172	0.376064	0.722669	CA-CN
Bola1	108.243	0.213039	0.417493	-0.510283	0.609853	0.855963	CA-CN
Uqcr11	560.129	0.212987	0.196712	-1.08273	0.278928	0.648451	CA-CN
Ago2	2345.34	0.212923	0.133261	-1.59778	0.110091	0.436025	CA-CN
Abcb10	584.596	0.212689	0.19319	-1.10093	0.270927	0.640213	CA-CN
A930005H10Rik	101.24	0.212648	0.403287	-0.527287	0.597994	0.849372	CA-CN
Tmem131l	2370.28	0.212637	0.143451	-1.48229	0.138262	0.48689	CA-CN
Ruvbl2	668.602	0.212069	0.185699	-1.14201	0.253451	0.626613	CA-CN
Srebf1	2230.24	0.21185	0.140864	-1.50394	0.132598	0.476653	CA-CN
Slco3a1	625.698	0.211766	0.205647	-1.02976	0.303125	0.666075	CA-CN
Dhdh	556.165	0.211593	0.196839	-1.07495	0.282395	0.65174	CA-CN
Raf1	3843.98	0.211456	0.132356	-1.59763	0.110125	0.436025	CA-CN
Tpcn2	349.955	0.211297	0.252096	-0.838162	0.40194	0.741627	CA-CN
Rapgef6	2166.9	0.211297	0.139823	-1.51117	0.130745	0.474226	CA-CN
Dync1h1	5832.88	0.21105	0.118705	-1.77793	0.0754155	0.358213	CA-CN
Tnfrsf13b	369.092	0.211004	0.24527	-0.860292	0.389628	0.732443	CA-CN
Vcp	1196.66	0.210941	0.168395	-1.25266	0.210331	0.588097	CA-CN
Zfp706	2805.63	0.21094	0.137659	-1.53234	0.125437	0.463178	CA-CN
Gm38431	2011.63	0.210928	0.160813	-1.31164	0.189641	0.563767	CA-CN
Zfp608	791.15	0.210866	0.204891	-1.02916	0.303402	0.666075	CA-CN
Zfyve27	1417.05	0.210785	0.15499	-1.36	0.173831	0.542818	CA-CN
Prrc1	1356.35	0.210642	0.16379	-1.28605	0.198427	0.572767	CA-CN
Rab3gap1	1071.63	0.210482	0.166267	-1.26593	0.205537	0.582751	CA-CN
Prdm4	721.018	0.21045	0.184438	-1.14103	0.253856	0.626613	CA-CN
Brd4	4220.27	0.21007	0.147327	-1.42588	0.153903	0.514644	CA-CN
Pxmp4	591.895	0.209977	0.19292	-1.08842	0.27641	0.645462	CA-CN
Rps6ka4	1755.29	0.209688	0.183215	-1.1445	0.252418	0.625598	CA-CN
Spg11	1221.68	0.209463	0.170254	-1.2303	0.218585	0.597233	CA-CN
Tex2	1408.73	0.209447	0.150156	-1.39486	0.16306	0.528653	CA-CN
Rcl1	271.443	0.209283	0.28027	-0.746719	0.455233	0.775083	CA-CN
Ikzf1	9726.92	0.2092	0.148063	-1.41291	0.157682	0.521887	CA-CN
Ube2l3	3387.21	0.209079	0.131717	-1.58733	0.112437	0.439397	CA-CN
Tbc1d8	3513.86	0.209054	0.13547	-1.54318	0.122787	0.459983	CA-CN
Cysltr1	1083.26	0.209021	0.165193	-1.26531	0.205759	0.583177	CA-CN
Fam117a	1442.69	0.208912	0.169055	-1.23576	0.216547	0.595715	CA-CN
Mpnd	1187.39	0.208852	0.162375	-1.28623	0.198362	0.572767	CA-CN
Mbd3	951.058	0.208519	0.187678	-1.11105	0.266548	0.636926	CA-CN
Rps6ka1	5643.13	0.208389	0.130789	-1.59332	0.111088	0.437881	CA-CN
Slc25a35	177.583	0.20795	0.35671	-0.582967	0.559915	0.831648	CA-CN
Chst14	296.165	0.207798	0.261375	-0.795021	0.426601	0.757581	CA-CN
Llgl1	1361.28	0.207534	0.159065	-1.30471	0.191992	0.565086	CA-CN
Klhdc10	1561.77	0.20749	0.158281	-1.31089	0.189894	0.564048	CA-CN
Mlkl	345.643	0.207199	0.241559	-0.857756	0.391027	0.733199	CA-CN
Prelid3b	1086.13	0.207152	0.184226	-1.12445	0.260824	0.633384	CA-CN
Huwe1	4855.85	0.207134	0.13038	-1.58869	0.112131	0.439397	CA-CN
Galk2	722.763	0.20713	0.184403	-1.12324	0.261334	0.633384	CA-CN
Mif	231.703	0.207128	0.278883	-0.742706	0.45766	0.775301	CA-CN
Alg10b	932.047	0.206908	0.179484	-1.1528	0.248994	0.623562	CA-CN
Fance	262.205	0.206779	0.264193	-0.782683	0.433813	0.762231	CA-CN
Gcc1	745.333	0.206774	0.186133	-1.1109	0.266613	0.636926	CA-CN
Ppfia4	4745.69	0.206656	0.143992	-1.43519	0.151233	0.509293	CA-CN
3110009E18Rik	88.3217	0.206523	0.481165	-0.429216	0.667766	0.883474	CA-CN
Letmd1	734.666	0.206033	0.182	-1.13205	0.257614	0.630669	CA-CN
Tollip	2006.15	0.205724	0.145995	-1.40912	0.1588	0.52266	CA-CN
Snapc1	247.471	0.205463	0.272302	-0.754541	0.450525	0.772423	CA-CN
Slc6a6	7490.39	0.204988	0.115325	-1.77749	0.0754882	0.358347	CA-CN
Lsm8	426.432	0.204976	0.238194	-0.860541	0.389491	0.732443	CA-CN
D130020L05Rik	385.446	0.204848	0.290865	-0.70427	0.481265	0.788303	CA-CN
Pira2	708.076	0.204667	0.187375	-1.09229	0.274706	0.644213	CA-CN
Strada	907.056	0.204592	0.183885	-1.11261	0.265875	0.636291	CA-CN
Slc26a6	547.896	0.204394	0.201374	-1.01499	0.310109	0.673516	CA-CN
Aff1	1634	0.204311	0.143691	-1.42188	0.155061	0.517231	CA-CN
Ahr	4526.88	0.204214	0.152721	-1.33717	0.181169	0.551502	CA-CN
Pigyl	265.579	0.204101	0.285407	-0.715121	0.474534	0.784231	CA-CN
Cryl1	586.593	0.203996	0.205544	-0.992466	0.32097	0.683245	CA-CN
Arsa	1347.72	0.203923	0.160384	-1.27147	0.203561	0.580284	CA-CN
Ado	1034.17	0.203834	0.188149	-1.08336	0.278648	0.648442	CA-CN
Ksr1	702.777	0.203774	0.182189	-1.11848	0.263364	0.634594	CA-CN
Pdcd6ip	5359.36	0.203737	0.123708	-1.64692	0.0995744	0.412902	CA-CN
Hsd17b10	898.623	0.203645	0.174957	-1.16397	0.244435	0.621382	CA-CN
Eif4g3	9090	0.20362	0.118111	-1.72397	0.0847126	0.381861	CA-CN
Bloc1s3	803.062	0.203469	0.182072	-1.11752	0.263772	0.634638	CA-CN
Arl15	650.4	0.203375	0.186399	-1.09107	0.275241	0.644377	CA-CN
Nucb2	790.515	0.203031	0.181906	-1.11614	0.264364	0.635117	CA-CN
Apopt1	670.561	0.202848	0.186638	-1.08685	0.277102	0.646612	CA-CN
Zmynd8	1393.07	0.202586	0.157543	-1.28591	0.198475	0.572767	CA-CN
Srsf9	1733.94	0.202404	0.169522	-1.19397	0.232489	0.611399	CA-CN
Psme4	2812.13	0.202357	0.144025	-1.40501	0.160019	0.523409	CA-CN
Plekho2	10425.3	0.20222	0.36703	-0.550963	0.581659	0.842013	CA-CN
Tm2d2	1474.44	0.202079	0.156474	-1.29145	0.196547	0.571279	CA-CN
Larp1b	213.908	0.201932	0.297179	-0.679497	0.496823	0.795644	CA-CN
Eef2kmt	732.866	0.20189	0.17894	-1.12825	0.259213	0.633178	CA-CN
Kif3b	2772.51	0.20164	0.141879	-1.42121	0.155256	0.517455	CA-CN
Kif2a	907.736	0.201635	0.186257	-1.08256	0.279002	0.648451	CA-CN
Pabpc1	33903.1	0.201594	0.132937	-1.51646	0.129403	0.471716	CA-CN
Psmb7	1516.73	0.20152	0.146209	-1.37831	0.168108	0.535896	CA-CN
Traf6	1522.31	0.201426	0.154248	-1.30586	0.191601	0.565086	CA-CN
LOC102634812	292.097	0.201299	0.257794	-0.780855	0.434888	0.762955	CA-CN
Ap2a1	1576.02	0.201231	0.157281	-1.27944	0.200743	0.576736	CA-CN
Ndufv1	1261.99	0.200697	0.159957	-1.25469	0.20959	0.586837	CA-CN
Tgfb1	16928.5	0.200593	0.15984	-1.25496	0.209492	0.586837	CA-CN
Peli2	1214	0.200534	0.158742	-1.26327	0.206493	0.583278	CA-CN
Zfp319	666.975	0.200507	0.188188	-1.06546	0.286669	0.654389	CA-CN
Wdtc1	2193.38	0.199958	0.169815	-1.1775	0.238995	0.615876	CA-CN
Acbd5	1504.11	0.199879	0.147987	-1.35065	0.176807	0.545746	CA-CN
Agap2	840.281	0.199877	0.175031	-1.14195	0.253473	0.626613	CA-CN
Pip4k2b	2009	0.199861	0.152219	-1.31298	0.189188	0.563041	CA-CN
Ikbkg	1038.69	0.199828	0.178679	-1.11836	0.263412	0.634594	CA-CN
Pskh1	636.035	0.1998	0.2339	-0.854212	0.392988	0.734361	CA-CN
Asb8	682.085	0.199674	0.196922	-1.01398	0.310594	0.673926	CA-CN
Tlnrd1	1671.44	0.19918	0.169436	-1.17555	0.239775	0.616532	CA-CN
Asna1	1517.67	0.199156	0.155288	-1.28249	0.19967	0.574575	CA-CN
Fam174a	1945.95	0.199074	0.169862	-1.17197	0.241208	0.618219	CA-CN
Elk4	1485.11	0.199066	0.159704	-1.24647	0.212591	0.590981	CA-CN
Fn1	91102.1	0.198921	0.12542	-1.58604	0.11273	0.439397	CA-CN
Rgp1	1324.99	0.198863	0.162404	-1.2245	0.220764	0.598685	CA-CN
Cops5	1014.11	0.198805	0.180756	-1.09985	0.271398	0.640791	CA-CN
Aatf	375.48	0.198646	0.233647	-0.850195	0.395217	0.735933	CA-CN
Nup85	390.357	0.198355	0.238842	-0.830487	0.406264	0.745646	CA-CN
Slc25a19	404.277	0.198339	0.250724	-0.791065	0.428906	0.759505	CA-CN
Aars	799.345	0.198338	0.174498	-1.13662	0.255697	0.627719	CA-CN
Numb	969.956	0.198331	0.16769	-1.18272	0.23692	0.613785	CA-CN
Sdhaf4	237.317	0.198327	0.27339	-0.725438	0.468184	0.780194	CA-CN
Pdzd8	2045.17	0.198309	0.137665	-1.44052	0.149721	0.506947	CA-CN
Dok1	1748.63	0.1983	0.156748	-1.26509	0.205839	0.583198	CA-CN
I830077J02Rik	2243.3	0.197958	0.143655	-1.378	0.168202	0.535896	CA-CN
Tusc3	377.654	0.197898	0.237229	-0.834209	0.404163	0.744032	CA-CN
Mbd6	3942.5	0.19789	0.140331	-1.41017	0.158491	0.52266	CA-CN
Oxld1	101.981	0.197743	0.410371	-0.481865	0.629902	0.864779	CA-CN
Coro1c	4723.95	0.197501	0.124651	-1.58442	0.113097	0.439618	CA-CN
Ermp1	1683.45	0.197348	0.150103	-1.31475	0.188593	0.562302	CA-CN
Mfsd1	4654.48	0.197337	0.12295	-1.60503	0.108488	0.434613	CA-CN
Snrpb	5427.7	0.197207	0.125039	-1.57716	0.114758	0.442882	CA-CN
4732471J01Rik	275.417	0.197141	0.268901	-0.733136	0.463476	0.778047	CA-CN
Efhd2	8216.84	0.197023	0.138723	-1.42026	0.155531	0.517945	CA-CN
Uggt1	5277.84	0.196667	0.127631	-1.5409	0.123341	0.46041	CA-CN
Sec24c	4111.93	0.196628	0.125715	-1.56407	0.117801	0.45011	CA-CN
Tap2	2150.82	0.196567	0.207171	-0.948817	0.342714	0.701438	CA-CN
Setd6	229.225	0.196442	0.294552	-0.666917	0.504825	0.798019	CA-CN
Ccnj	465.583	0.196404	0.208809	-0.94059	0.346915	0.704414	CA-CN
Pcyt1a	2013.91	0.196308	0.165094	-1.18907	0.234412	0.61271	CA-CN
Hdac5	3764.91	0.196259	0.131146	-1.49649	0.134526	0.481058	CA-CN
Map2k2	2539.99	0.196232	0.150888	-1.30051	0.193426	0.566686	CA-CN
Lonp2	1269.7	0.195928	0.162727	-1.20403	0.228577	0.606615	CA-CN
G3bp1	1798.52	0.195575	0.145227	-1.34668	0.178082	0.547678	CA-CN
Ptpa	2802.38	0.195007	0.137647	-1.41672	0.156565	0.519464	CA-CN
Nfkbie	1976.37	0.19492	0.155085	-1.25686	0.208805	0.586467	CA-CN
Rapgef2	864.754	0.194912	0.179816	-1.08395	0.278386	0.648387	CA-CN
Psd4	2593.57	0.194777	0.14381	-1.3544	0.175607	0.545281	CA-CN
Timm21	337.342	0.194699	0.241271	-0.806975	0.419681	0.753927	CA-CN
Mlf2	2584.47	0.194675	0.147577	-1.31914	0.187122	0.559362	CA-CN
AB124611	6747.02	0.194566	0.121067	-1.6071	0.108032	0.433898	CA-CN
Pex26	467.432	0.194416	0.25936	-0.749599	0.453496	0.774072	CA-CN
Gpi1	8445.96	0.194359	0.11678	-1.66432	0.0960488	0.406385	CA-CN
Atp6v1g1	920.51	0.194335	0.168172	-1.15558	0.247854	0.62315	CA-CN
Anapc2	1560.14	0.194189	0.150609	-1.28936	0.197274	0.571954	CA-CN
Mrpl43	1139.46	0.194136	0.168622	-1.15131	0.249605	0.6242	CA-CN
Hax1	191.82	0.193699	0.302822	-0.639646	0.522403	0.810737	CA-CN
Nostrin	240.507	0.19364	0.294146	-0.658312	0.510337	0.801598	CA-CN
H2afv	496.654	0.193603	0.216924	-0.892493	0.372129	0.718344	CA-CN
Tamm41	126.441	0.193532	0.365702	-0.529207	0.596662	0.848523	CA-CN
Wbp1	570.254	0.193453	0.221561	-0.873134	0.38259	0.727959	CA-CN
Vipas39	1056.83	0.193427	0.16086	-1.20246	0.229186	0.607119	CA-CN
Mrps25	1767.33	0.193398	0.158536	-1.2199	0.222502	0.600445	CA-CN
Rassf5	6962.91	0.193215	0.120765	-1.59992	0.109616	0.436025	CA-CN
Cdc34	1145.1	0.193068	0.182257	-1.05932	0.289454	0.655486	CA-CN
Nat8l	3425.12	0.193042	0.131326	-1.46995	0.141576	0.492518	CA-CN
Lsm4	458.46	0.192932	0.215879	-0.893704	0.37148	0.717888	CA-CN
Cox15	942.79	0.192847	0.175858	-1.09661	0.272812	0.642253	CA-CN
Khk	864.048	0.192718	0.193045	-0.998308	0.31813	0.681066	CA-CN
Atp10a	843.172	0.192457	0.17109	-1.12488	0.260638	0.633178	CA-CN
Gsto1	2151.8	0.192413	0.144327	-1.33318	0.182473	0.552101	CA-CN
Gpsm3	3751.37	0.192252	0.130804	-1.46977	0.141624	0.492518	CA-CN
Ipo8	1364.2	0.192066	0.153069	-1.25477	0.209561	0.586837	CA-CN
Tmem250-ps	1273.05	0.191969	0.15913	-1.20637	0.227677	0.605615	CA-CN
Tab2	8666.84	0.191938	0.115745	-1.65828	0.0972602	0.408881	CA-CN
Sars	1732.76	0.191717	0.142172	-1.34849	0.177501	0.547061	CA-CN
Slc8b1	3851.42	0.19168	0.12351	-1.55194	0.120677	0.456363	CA-CN
Tbcb	765.232	0.191622	0.182106	-1.05225	0.292684	0.65801	CA-CN
Slc35b2	975.799	0.19162	0.166322	-1.1521	0.249279	0.623698	CA-CN
Elmod3	379.203	0.191321	0.225517	-0.848367	0.396234	0.736982	CA-CN
2510039O18Rik	3005.34	0.191284	0.151978	-1.25863	0.208165	0.585889	CA-CN
Chst12	2414.05	0.191069	0.162027	-1.17925	0.2383	0.615261	CA-CN
Nploc4	1830.93	0.191041	0.163268	-1.1701	0.241959	0.618977	CA-CN
Fam241a	630.859	0.191	0.206257	-0.92603	0.35443	0.707399	CA-CN
Umps	706.61	0.19098	0.189696	-1.00677	0.314047	0.677226	CA-CN
Cbx8	269.418	0.190926	0.267878	-0.712735	0.47601	0.78606	CA-CN
Desi1	644.447	0.190896	0.199623	-0.956286	0.338928	0.698269	CA-CN
A430078G23Rik	839.271	0.190646	0.178344	-1.06898	0.285079	0.653003	CA-CN
Ccdc71	862.469	0.190645	0.187171	-1.01856	0.308411	0.671542	CA-CN
Selenon	892.828	0.190588	0.172546	-1.10456	0.269349	0.639496	CA-CN
Dync1li1	1114.06	0.190408	0.162464	-1.172	0.241195	0.618219	CA-CN
Serhl	655.854	0.190343	0.201852	-0.94298	0.345691	0.703828	CA-CN
Ipp	220.967	0.190299	0.285228	-0.667183	0.504655	0.798019	CA-CN
Pla2g15	1462.18	0.190058	0.172475	-1.10194	0.270486	0.640129	CA-CN
Mllt1	970.557	0.189938	0.172473	-1.10126	0.270784	0.640213	CA-CN
Crtc3	1428.28	0.189865	0.159873	-1.1876	0.234991	0.612978	CA-CN
Fbxo46	489.143	0.189844	0.211851	-0.896119	0.370189	0.716549	CA-CN
A230103J11Rik	259.477	0.189839	0.276575	-0.686392	0.492466	0.792665	CA-CN
Nlk	822.363	0.189685	0.182936	-1.0369	0.299785	0.663089	CA-CN
Zfp266	1103.42	0.189237	0.162627	-1.16363	0.244576	0.621531	CA-CN
Ccdc93	1500.9	0.18922	0.163667	-1.15613	0.247629	0.62315	CA-CN
Mrpl2	544.221	0.189157	0.217677	-0.868981	0.384857	0.729408	CA-CN
Usf3	3161.4	0.189111	0.139952	-1.35126	0.176613	0.545746	CA-CN
Aspscr1	1448.29	0.189063	0.169696	-1.11413	0.265225	0.636232	CA-CN
Rnf169	1592.25	0.188839	0.172563	-1.09432	0.273813	0.64386	CA-CN
Ccdc125	1431.04	0.188726	0.152262	-1.23949	0.215165	0.594099	CA-CN
Pon3	493.199	0.188467	0.261176	-0.721608	0.470536	0.781733	CA-CN
Gpd2	1122.32	0.188444	0.160733	-1.17241	0.241034	0.618174	CA-CN
Cox7b	1695.22	0.188068	0.146064	-1.28758	0.197894	0.572315	CA-CN
2900097C17Rik	711.893	0.187986	0.184331	-1.01983	0.30781	0.671307	CA-CN
Fam76a	833.449	0.187975	0.18661	-1.00731	0.313785	0.677125	CA-CN
Terf2ip	483.873	0.187929	0.211612	-0.888083	0.374496	0.720863	CA-CN
Hras	630.994	0.187916	0.206223	-0.911223	0.362178	0.711767	CA-CN
Mknk2	10270.1	0.187896	0.125994	-1.49131	0.13588	0.483773	CA-CN
Snrpa	888.219	0.187889	0.168822	-1.11294	0.265733	0.636232	CA-CN
Mthfsl	138.585	0.187843	0.349816	-0.536976	0.591284	0.846381	CA-CN
Srcap	4105.21	0.18779	0.130464	-1.4394	0.150037	0.50759	CA-CN
Gas2l1	1013.24	0.1877	0.20758	-0.904233	0.365872	0.713834	CA-CN
Foxo1	790.891	0.187504	0.188572	-0.994337	0.320059	0.682562	CA-CN
Wdr36	773.069	0.187471	0.182138	-1.02928	0.303347	0.666075	CA-CN
Etfdh	722.694	0.187302	0.187189	-1.0006	0.317019	0.680383	CA-CN
Rcbtb1	758.852	0.187226	0.193548	-0.967335	0.333377	0.694306	CA-CN
Frat1	394.664	0.187223	0.242765	-0.771212	0.440581	0.765878	CA-CN
Zfp512b	659.881	0.18718	0.186634	-1.00293	0.315895	0.679234	CA-CN
Ptprj	7776.29	0.187103	0.142479	-1.3132	0.189117	0.563034	CA-CN
Iars	1166.11	0.186945	0.160912	-1.16179	0.245322	0.621792	CA-CN
Xdh	15450	0.186857	0.116643	-1.60195	0.109166	0.435397	CA-CN
Atp6v0d1	4169.81	0.186807	0.122263	-1.52791	0.126535	0.466519	CA-CN
Polrmt	589.041	0.186644	0.2042	-0.914024	0.360704	0.710816	CA-CN
Gpr35	8360.44	0.186356	0.114838	-1.62277	0.104638	0.426408	CA-CN
Nckipsd	1081.88	0.186302	0.164783	-1.13059	0.258227	0.631629	CA-CN
Ccdc71l	1742.11	0.186049	0.148227	-1.25516	0.209419	0.586837	CA-CN
Polr2m	2233.31	0.185778	0.153268	-1.21211	0.225471	0.604121	CA-CN
Calcrl	545.172	0.185746	0.214658	-0.865313	0.386867	0.731155	CA-CN
Vav1	4533.77	0.18571	0.123756	-1.50062	0.133455	0.478936	CA-CN
Ndufv2	1714.32	0.185705	0.145322	-1.27789	0.201288	0.577384	CA-CN
0610010F05Rik	597.599	0.1856	0.203567	-0.911742	0.361905	0.711696	CA-CN
Tmem109	2459.13	0.185516	0.136481	-1.35928	0.174058	0.542818	CA-CN
Tfip11	1146.85	0.185514	0.159045	-1.16643	0.243441	0.620024	CA-CN
Rhbdd1	809.95	0.185481	0.17296	-1.07239	0.283544	0.65174	CA-CN
Ankrd13a	4772.35	0.185363	0.122261	-1.51613	0.129487	0.471812	CA-CN
Man1a2	1734.52	0.185327	0.142767	-1.29811	0.19425	0.567557	CA-CN
Apaf1	4047.44	0.185322	0.123003	-1.50665	0.1319	0.475717	CA-CN
Fmnl1	18747.4	0.185312	0.122499	-1.51277	0.130339	0.474061	CA-CN
Bscl2	3672.17	0.185289	0.134141	-1.3813	0.167187	0.53577	CA-CN
Timm29	1017.99	0.185039	0.176246	-1.04989	0.293769	0.658207	CA-CN
Cyba	10981.1	0.185037	0.123344	-1.50017	0.13357	0.478936	CA-CN
Phc2	2951.46	0.184861	0.146456	-1.26223	0.206867	0.583454	CA-CN
Dnajc16	829.274	0.184803	0.175394	-1.05364	0.292048	0.657737	CA-CN
Fbxo9	745.183	0.184712	0.180684	-1.02229	0.306643	0.669483	CA-CN
Sec11c	2242.36	0.184688	0.143508	-1.28695	0.198111	0.5726	CA-CN
Ranbp10	1560.99	0.184451	0.153013	-1.20546	0.228027	0.605859	CA-CN
Plekha2	2278.11	0.184404	0.140533	-1.31217	0.189462	0.563441	CA-CN
Msn	32938.7	0.184193	0.115548	-1.59408	0.110917	0.437663	CA-CN
Map3k3	5201.76	0.18401	0.119379	-1.54139	0.123222	0.46041	CA-CN
Aaas	279.52	0.183937	0.26768	-0.687154	0.491986	0.792665	CA-CN
Slc41a1	1090.68	0.183896	0.164524	-1.11775	0.263676	0.634594	CA-CN
Prep	1333.66	0.183826	0.161393	-1.139	0.254704	0.626613	CA-CN
Prcc	916.852	0.183823	0.166671	-1.10291	0.270067	0.639743	CA-CN
Atl3	3287.49	0.183796	0.140373	-1.30934	0.190421	0.564107	CA-CN
Zbtb2	443.521	0.183774	0.229763	-0.799842	0.423803	0.756225	CA-CN
8030462N17Rik	740.816	0.183774	0.187612	-0.979538	0.327314	0.688373	CA-CN
Mtpn	15042	0.183545	0.116436	-1.57635	0.114944	0.443388	CA-CN
Atp5g1	133.335	0.183298	0.35437	-0.517251	0.604981	0.853885	CA-CN
Chp1	4769.58	0.18329	0.124448	-1.47283	0.140798	0.490488	CA-CN
Rdh10	358.688	0.183089	0.247439	-0.739935	0.459339	0.775861	CA-CN
Hspbp1	544.257	0.183079	0.222014	-0.82463	0.409582	0.748894	CA-CN
Ranbp6	823.687	0.18305	0.174939	-1.04637	0.295392	0.659782	CA-CN
Napsa	8843.57	0.183035	0.11625	-1.5745	0.115373	0.444405	CA-CN
Iqsec2	1029.04	0.182958	0.184176	-0.993389	0.32052	0.682824	CA-CN
Itgam	23139	0.182754	0.110644	-1.65172	0.098591	0.411719	CA-CN
Nup214	1213.86	0.18269	0.161123	-1.13385	0.256857	0.629738	CA-CN
Prkci	759.57	0.182626	0.183535	-0.99505	0.319712	0.682181	CA-CN
Atp5e	2214.58	0.182547	0.14446	-1.26366	0.206354	0.583278	CA-CN
Ncoa6	1623.57	0.182441	0.169981	-1.0733	0.283135	0.65174	CA-CN
Ebp	1471.07	0.182382	0.154014	-1.18419	0.236338	0.613785	CA-CN
Foxj2	2057.52	0.1823	0.144872	-1.25835	0.208266	0.58597	CA-CN
Orai3	1993.83	0.182212	0.153573	-1.18649	0.23543	0.613297	CA-CN
9530068E07Rik	4215.71	0.182209	0.126276	-1.44294	0.149038	0.506117	CA-CN
Zbtb42	593.906	0.182088	0.191776	-0.94948	0.342377	0.701313	CA-CN
Pycr2	809.818	0.182064	0.173228	-1.05101	0.293254	0.658011	CA-CN
Rab29	1389.44	0.181785	0.150618	-1.20692	0.227461	0.605615	CA-CN
Cc2d1a	605.528	0.181661	0.193542	-0.938616	0.347928	0.704414	CA-CN
Gna12	860.197	0.181659	0.183083	-0.992221	0.32109	0.683319	CA-CN
Naxd	655.561	0.181526	0.188532	-0.962836	0.33563	0.696344	CA-CN
Csf3r	12404.1	0.181477	0.119394	-1.51998	0.128516	0.47088	CA-CN
Lats2	3327.75	0.181331	0.143237	-1.26595	0.205532	0.582751	CA-CN
Chmp2a	2166.17	0.181038	0.135622	-1.33488	0.181916	0.551819	CA-CN
Crat	1376.51	0.180816	0.149329	-1.21086	0.225949	0.604121	CA-CN
Slc16a13	300.746	0.180807	0.26124	-0.692111	0.488868	0.792332	CA-CN
Abhd17a	1949.62	0.180542	0.155908	-1.158	0.246862	0.623048	CA-CN
Urod	913.262	0.18052	0.177331	-1.01798	0.308685	0.671542	CA-CN
Tapbpl	1115.9	0.180489	0.221573	-0.81458	0.415312	0.752399	CA-CN
Pi4k2a	2046.78	0.180358	0.140183	-1.28659	0.198238	0.572696	CA-CN
Wipi2	1639.15	0.18035	0.156272	-1.15408	0.248467	0.62315	CA-CN
Ppm1d	579.258	0.180342	0.198302	-0.909432	0.363122	0.711866	CA-CN
Kdm5c	4127.82	0.180295	0.12284	-1.46772	0.14218	0.49337	CA-CN
Ube2h	1342.83	0.180128	0.155184	-1.16074	0.24575	0.621792	CA-CN
Bace1	495.936	0.18011	0.250333	-0.719481	0.471844	0.781796	CA-CN
Lias	416.406	0.179844	0.221381	-0.812375	0.416576	0.752558	CA-CN
Smim24	125.376	0.17959	0.382146	-0.46995	0.638391	0.868181	CA-CN
Thbd	2165.68	0.179583	0.145279	-1.23612	0.216413	0.595633	CA-CN
Rxra	3023.29	0.179544	0.135372	-1.3263	0.184739	0.556092	CA-CN
Ids	4269.09	0.179448	0.127429	-1.40822	0.159066	0.52266	CA-CN
Fryl	1627.82	0.179448	0.144403	-1.24268	0.213985	0.592556	CA-CN
Mpv17	775.667	0.179375	0.179825	-0.997498	0.318523	0.681066	CA-CN
Rpl41	3922.77	0.179229	0.13186	-1.35923	0.174072	0.542818	CA-CN
H2afy	7629.17	0.179184	0.118073	-1.51756	0.129125	0.471128	CA-CN
Oard1	423.078	0.179068	0.229978	-0.77863	0.436198	0.763393	CA-CN
Sgpp1	2419.27	0.178944	0.152853	-1.17069	0.241723	0.618761	CA-CN
Prorsd1	376.732	0.178933	0.257626	-0.694544	0.487341	0.791905	CA-CN
Mtch1	3243.89	0.178899	0.133999	-1.33508	0.181851	0.551819	CA-CN
Map1lc3a	225.377	0.178809	0.279597	-0.639521	0.522484	0.810737	CA-CN
Ubr1	1474.73	0.178774	0.159885	-1.11814	0.263509	0.634594	CA-CN
Echs1	1145.9	0.17876	0.158849	-1.12535	0.260442	0.633178	CA-CN
Rab32	4701.24	0.178627	0.124244	-1.43772	0.150514	0.50793	CA-CN
Osgep	726.693	0.178617	0.183334	-0.974272	0.329921	0.691024	CA-CN
Elk3	3562.71	0.178505	0.143512	-1.24383	0.213561	0.592219	CA-CN
Tiam1	5479.39	0.178287	0.131278	-1.35809	0.174435	0.543219	CA-CN
Sh3bp5l	910.246	0.178152	0.171271	-1.04018	0.298256	0.662302	CA-CN
Pld3	583.814	0.178096	0.197967	-0.899624	0.36832	0.714468	CA-CN
Ldlrap1	1800.73	0.177998	0.173985	-1.02306	0.306278	0.668866	CA-CN
Atg9a	3120.94	0.17796	0.157223	-1.1319	0.257679	0.630669	CA-CN
Pcyox1	2567.59	0.177848	0.145542	-1.22196	0.221721	0.599433	CA-CN
Ralbp1	3628.04	0.177742	0.12785	-1.39023	0.164458	0.531059	CA-CN
Irak1	4139.51	0.177664	0.1297	-1.36981	0.170746	0.5387	CA-CN
Glud1	15674.8	0.177481	0.114665	-1.54782	0.121665	0.457837	CA-CN
R3hdm2	1873.37	0.177414	0.149756	-1.18469	0.236141	0.613785	CA-CN
Smarce1	712.024	0.177197	0.180249	-0.983067	0.325574	0.686899	CA-CN
Hmbs	449.619	0.177185	0.228956	-0.773884	0.439	0.764816	CA-CN
Tnfrsf1b	30145.5	0.177183	0.126773	-1.39764	0.162222	0.52711	CA-CN
2610001J05Rik	745.896	0.177125	0.177628	-0.997166	0.318684	0.681066	CA-CN
Rab5b	2601.35	0.177075	0.131707	-1.34447	0.178798	0.54867	CA-CN
Scamp3	1537.57	0.177016	0.146092	-1.21168	0.225637	0.604121	CA-CN
Slc9a3r1	2398.27	0.176933	0.158451	-1.11664	0.264146	0.634818	CA-CN
Pofut2	1739.73	0.17678	0.149592	-1.18175	0.237306	0.613785	CA-CN
Entpd6	520.442	0.176705	0.201407	-0.877353	0.380295	0.726618	CA-CN
Rpl35	1368.48	0.176586	0.164625	-1.07266	0.283425	0.65174	CA-CN
Psap	203346	0.176557	0.129425	-1.36417	0.172514	0.54235	CA-CN
Akt2	1255.64	0.176516	0.15407	-1.14569	0.251925	0.625549	CA-CN
Prdx4	823.868	0.176501	0.172313	-1.0243	0.305693	0.668019	CA-CN
As3mt	324.601	0.176187	0.256419	-0.687108	0.492015	0.792665	CA-CN
Imp4	1027.47	0.175979	0.177214	-0.993034	0.320693	0.682835	CA-CN
Pfdn2	459.593	0.175974	0.209648	-0.839378	0.401257	0.741212	CA-CN
Tbc1d20	1850.86	0.175869	0.148191	-1.18677	0.235319	0.613297	CA-CN
Klf3	5172.4	0.175825	0.121887	-1.44252	0.149155	0.506301	CA-CN
Lman2	6507.52	0.175815	0.11916	-1.47545	0.140092	0.489506	CA-CN
Cby1	245.042	0.175741	0.276385	-0.635857	0.524869	0.810979	CA-CN
Smarcd1	588.002	0.17568	0.21102	-0.832525	0.405113	0.744393	CA-CN
Mogs	1448.13	0.175657	0.177908	-0.987351	0.323471	0.684783	CA-CN
Rpl22l1	367.212	0.175651	0.255021	-0.688769	0.490968	0.792665	CA-CN
Tbc1d22a	1550.21	0.175575	0.149999	-1.1705	0.241798	0.618761	CA-CN
Raver1	2663.01	0.175563	0.156739	-1.1201	0.262671	0.634594	CA-CN
Trappc2l	733.218	0.175547	0.186347	-0.942045	0.34617	0.703846	CA-CN
Ms4a8a	184.001	0.175408	0.341202	-0.514089	0.60719	0.854566	CA-CN
Ppp2r5e	1392.64	0.175217	0.155994	-1.12323	0.26134	0.633384	CA-CN
Cfdp1	646.247	0.175166	0.197619	-0.886382	0.375412	0.721822	CA-CN
Ipmk	3015.34	0.175043	0.135354	-1.29322	0.195934	0.570363	CA-CN
Coa3	739.785	0.174796	0.179547	-0.97354	0.330285	0.691311	CA-CN
Slc10a7	593.92	0.174652	0.194069	-0.899947	0.368148	0.714468	CA-CN
Map3k11	4692.76	0.174631	0.122709	-1.42313	0.154698	0.516493	CA-CN
Phf14	1106.55	0.174442	0.162976	-1.07036	0.284459	0.652238	CA-CN
Map4k1	2433.02	0.174386	0.149644	-1.16534	0.243882	0.620691	CA-CN
Klhl5	2935.19	0.174334	0.129608	-1.34509	0.178597	0.548615	CA-CN
Fbxl14	2137.52	0.174284	0.143393	-1.21543	0.224202	0.602514	CA-CN
Snrnp200	3391.01	0.174197	0.126901	-1.3727	0.169845	0.537511	CA-CN
Irf2bp2	5089.19	0.174125	0.166758	-1.04418	0.296404	0.660659	CA-CN
Gatad2b	715.127	0.173929	0.184203	-0.944221	0.345057	0.703418	CA-CN
Pofut1	1064.6	0.173826	0.167638	-1.03691	0.299778	0.663089	CA-CN
Ptdss2	256.974	0.173788	0.270116	-0.643383	0.519975	0.808903	CA-CN
Ndufaf7	358.396	0.173574	0.249147	-0.696673	0.486008	0.791227	CA-CN
Lrrc8d	3153.64	0.173525	0.145955	-1.1889	0.234479	0.61271	CA-CN
Rnaseh2a	335.471	0.17337	0.254412	-0.681453	0.495585	0.795644	CA-CN
Mgat4b	915.846	0.173166	0.170248	-1.01714	0.309088	0.671559	CA-CN
Pacs1	1883.69	0.173042	0.153588	-1.12667	0.259882	0.633178	CA-CN
Tcf3	1269.05	0.173013	0.189784	-0.911631	0.361963	0.711696	CA-CN
Pak4	865.374	0.172997	0.176665	-0.979234	0.327464	0.688373	CA-CN
Acadsb	1205.21	0.172888	0.160869	-1.07471	0.282503	0.65174	CA-CN
Ddx54	2025.89	0.172857	0.138889	-1.24457	0.213289	0.591941	CA-CN
Rps21	2938.91	0.172829	0.138374	-1.24899	0.211667	0.590201	CA-CN
Fam3a	546.308	0.172796	0.221773	-0.779156	0.435888	0.763016	CA-CN
Eif3l	3226.93	0.172733	0.128098	-1.34844	0.177517	0.547061	CA-CN
Kbtbd11	1309.67	0.172684	0.213554	-0.808621	0.418733	0.753864	CA-CN
Nup210	2668.32	0.172679	0.143613	-1.20239	0.229211	0.607119	CA-CN
Rnf123	1391.01	0.172609	0.150142	-1.14965	0.25029	0.62449	CA-CN
Slc25a51	2351.22	0.172539	0.133423	-1.29318	0.19595	0.570363	CA-CN
Clec16a	1522.88	0.172514	0.154142	-1.11919	0.26306	0.634594	CA-CN
Plod1	1309.05	0.172409	0.152857	-1.12791	0.259357	0.633178	CA-CN
Deaf1	541.106	0.172051	0.231677	-0.742636	0.457702	0.775301	CA-CN
Tor1a	2118.22	0.172039	0.138434	-1.24275	0.213958	0.592556	CA-CN
D430042O09Rik	924.765	0.171911	0.174327	-0.986139	0.324065	0.68497	CA-CN
Rab26os	49.817	0.171909	0.587767	-0.292478	0.769921	0.927155	CA-CN
Plekha1	2507.82	0.171751	0.13872	-1.23811	0.215675	0.594411	CA-CN
Sec61b	1076.37	0.171548	0.159857	-1.07313	0.283212	0.65174	CA-CN
Smcr8	1946.55	0.171398	0.163261	-1.04984	0.293794	0.658207	CA-CN
Tfeb	1949.65	0.171178	0.164194	-1.04253	0.297164	0.661545	CA-CN
Tshz1	795.505	0.171148	0.176218	-0.971234	0.331432	0.691889	CA-CN
Eif3h	5025.08	0.171074	0.120835	-1.41577	0.156844	0.520178	CA-CN
Rps10	1081.35	0.170993	0.17378	-0.983961	0.325135	0.686508	CA-CN
Cmc2	349.02	0.170902	0.257631	-0.663361	0.507099	0.79984	CA-CN
Hagh	674.674	0.17088	0.190526	-0.896887	0.369779	0.716099	CA-CN
Pak1ip1	1482.7	0.17078	0.15982	-1.06857	0.285262	0.653003	CA-CN
Rab8b	8201.45	0.170749	0.127528	-1.33892	0.180596	0.550501	CA-CN
Egln1	1496.88	0.170743	0.151736	-1.12527	0.260475	0.633178	CA-CN
Uhrf1bp1l	1953.02	0.170698	0.148311	-1.15095	0.249754	0.6242	CA-CN
Ssh2	12389.6	0.170622	0.123657	-1.37981	0.167646	0.53577	CA-CN
Ap4b1	673.345	0.170552	0.189715	-0.898992	0.368657	0.714468	CA-CN
Lipa	4963.13	0.170368	0.120909	-1.40906	0.158816	0.52266	CA-CN
Ncaph2	1276.07	0.170286	0.161772	-1.05263	0.292512	0.657989	CA-CN
Cdc42ep3	2718.44	0.170243	0.146478	-1.16224	0.245139	0.621792	CA-CN
Tapbp	10900.7	0.170238	0.138635	-1.22796	0.219461	0.597446	CA-CN
Mrpl48	629.024	0.170123	0.212249	-0.801523	0.422829	0.755358	CA-CN
Eif2ak1	2204.86	0.170091	0.144366	-1.1782	0.238719	0.615751	CA-CN
Rwdd1	304.53	0.170059	0.250162	-0.679796	0.496634	0.795644	CA-CN
Ric1	1034.47	0.170051	0.188664	-0.901344	0.367406	0.714448	CA-CN
[truncated: 6,090 more rows]

## Sheet: padj<0.05
GENE	baseMean	log2FoldChange	lfcSE	pvalue	padj	contrast
Fosb	911.293	-2.92739	0.253209	5.30481e-31	1.43035e-27	CA-CN
Lpl	384.553	-2.43943	0.291361	7.13076e-19	7.21009e-16	CA-CN
Hist1h2bg	32.0243	-2.41955	1.03835	0.000882752	0.0213152	CA-CN
Egr1	449.573	-2.40932	0.922217	0.000342161	0.0100907	CA-CN
Cd36	480.314	-2.34596	0.322204	3.9753e-15	1.89154e-12	CA-CN
Ccl3	84.2463	-2.32891	0.573951	3.14481e-06	0.000233379	CA-CN
Ccl2	53.1305	-2.11183	0.717736	0.000139722	0.00518444	CA-CN
4931408C20Rik	2019.71	-1.87475	0.152874	1.05708e-35	4.27537e-32	CA-CN
Cd83	199.286	-1.76224	0.413155	1.60375e-07	1.82714e-05	CA-CN
Nrgn	655.364	-1.75873	0.211946	3.62023e-18	3.25378e-15	CA-CN
Clec1b	77.7798	-1.75725	0.555308	7.98482e-05	0.00336402	CA-CN
Nab2	684.892	-1.67544	0.19541	6.3891e-19	7.21009e-16	CA-CN
Tmod4	142.963	-1.6433	0.381094	1.21587e-06	0.00010245	CA-CN
Alox12	145.49	-1.57767	0.434992	7.91392e-06	0.000492428	CA-CN
Asgr2	140.445	-1.56057	0.380823	1.74714e-06	0.000138555	CA-CN
Cd209d	137.677	-1.53448	0.480546	2.55687e-05	0.00133427	CA-CN
Dok2	587.114	-1.5135	0.21624	1.45837e-13	5.89839e-11	CA-CN
Cd9	482.914	-1.5065	0.215125	1.65819e-13	6.09687e-11	CA-CN
Cd209a	1623.74	-1.50086	0.658597	0.000667655	0.0173655	CA-CN
Mrc1	540.211	-1.48276	0.877145	0.000872708	0.0211992	CA-CN
Pcp4l1	131.982	-1.34745	0.509429	0.000225306	0.00737856	CA-CN
Itga2b	301.099	-1.2951	0.287509	3.23418e-07	3.35401e-05	CA-CN
Siglec1	821.042	-1.25282	0.292665	4.4131e-07	4.35336e-05	CA-CN
5730408K05Rik	59.756	-1.25074	0.603924	0.00132985	0.0289951	CA-CN
Lyz1	776.843	-1.24635	0.225779	5.24802e-10	1.00146e-07	CA-CN
E230016K23Rik	604.171	-1.23637	0.198708	3.90738e-11	9.87712e-09	CA-CN
Fhl1	143.791	-1.22706	0.560919	0.000575042	0.0153515	CA-CN
H2-T24	1735.92	-1.22564	0.208405	1.05645e-10	2.4416e-08	CA-CN
Ifi208	323.34	-1.20556	0.262838	1.9398e-07	2.17931e-05	CA-CN
Sqle	428.035	-1.18233	0.258053	2.09192e-07	2.31802e-05	CA-CN
Ctla2a	354.222	-1.15282	0.258156	4.89382e-07	4.75992e-05	CA-CN
Pf4	203.423	-1.14654	0.385722	0.000114493	0.00443127	CA-CN
Plekhh3	558.623	-1.10997	0.254028	4.20483e-07	4.21535e-05	CA-CN
Usp18	569.785	-1.05622	0.260522	1.0921e-06	9.49892e-05	CA-CN
Pgap1	2063.87	-1.01691	0.15059	7.75948e-13	2.32468e-10	CA-CN
Rtp4	687.917	-1.01389	0.269538	3.81992e-06	0.00026869	CA-CN
Gp9	129.173	-1.01106	0.593625	0.00252444	0.0456487	CA-CN
Il15	425.462	-1.00576	0.228938	7.01034e-07	6.41127e-05	CA-CN
Rnase2a	133.949	-0.984158	0.42159	0.000843786	0.0206205	CA-CN
Tnf	251.511	-0.966135	0.294652	5.70529e-05	0.00269883	CA-CN
Tsc22d1	991.514	-0.964735	0.217721	2.15953e-07	2.3606e-05	CA-CN
Maf	2142.61	-0.960109	0.138587	2.28052e-13	8.0205e-11	CA-CN
Lmtk2	690.355	-0.944146	0.212701	5.25186e-07	4.93981e-05	CA-CN
Rpl10	140.767	-0.925646	0.400938	0.000955243	0.0225276	CA-CN
Il12rb2	423.558	-0.919941	0.25899	1.84711e-05	0.00102338	CA-CN
Hcfc2	210.532	-0.916169	0.314058	0.000166143	0.00588627	CA-CN
Mx1	1705.66	-0.900844	0.149212	1.21823e-10	2.7373e-08	CA-CN
Ms4a7	867.481	-0.896902	0.239695	4.92103e-06	0.000336907	CA-CN
Stap1	497.678	-0.88323	0.216809	2.42575e-06	0.000184493	CA-CN
Alox5	375.11	-0.861626	0.283365	8.29324e-05	0.00345794	CA-CN
Pdlim7	183.284	-0.857126	0.409583	0.00164287	0.0336417	CA-CN
Samd9l	7765.34	-0.855402	0.176693	4.27859e-08	5.76826e-06	CA-CN
Hsph1	956.301	-0.842862	0.222682	1.15456e-05	0.000671885	CA-CN
Thbs1	3121.38	-0.836037	0.14346	4.30813e-10	8.71211e-08	CA-CN
Irf4	2804.21	-0.807985	0.131822	5.52319e-11	1.35385e-08	CA-CN
Hspa8	2464.84	-0.796651	0.161208	7.17599e-08	8.93024e-06	CA-CN
Ivns1abp	5228.82	-0.783505	0.135056	5.32363e-10	1.00146e-07	CA-CN
Jund	6506	-0.779242	0.143141	4.32574e-09	7.28265e-07	CA-CN
Clec10a	2501.87	-0.777468	0.211411	5.62121e-06	0.000369674	CA-CN
Sult1a1	139.226	-0.774506	0.47496	0.00249632	0.045377	CA-CN
Ifit1	269.22	-0.754019	0.431138	0.00144294	0.0306351	CA-CN
Flt3	582.914	-0.753298	0.231393	7.35886e-05	0.00321761	CA-CN
Ehd1	2050.22	-0.74843	0.189151	5.81703e-06	0.000376431	CA-CN
Mtss1	382.598	-0.745938	0.267849	0.00025298	0.00805653	CA-CN
Rhob	4493.2	-0.735515	0.123528	1.75053e-10	3.72632e-08	CA-CN
Gbp9	1456.24	-0.731365	0.183929	2.71264e-06	0.000203171	CA-CN
Kcne3	497.787	-0.713328	0.22861	9.78314e-05	0.00395679	CA-CN
9830107B12Rik	3252.84	-0.69367	0.132717	1.13739e-08	1.70377e-06	CA-CN
Hmgcs1	1454.3	-0.690149	0.179285	7.49475e-06	0.000469961	CA-CN
Pdgfb	504.823	-0.69007	0.327471	0.00161219	0.033353	CA-CN
Gt(ROSA)26Sor	384.138	-0.686947	0.247541	0.000310991	0.00942174	CA-CN
Dnaja1	582.726	-0.685456	0.225836	0.000161716	0.00581387	CA-CN
Rhof	246.725	-0.671093	0.3252	0.00176743	0.0353879	CA-CN
Hnrnph3	447.967	-0.669155	0.250766	0.000434514	0.0121199	CA-CN
A530064D06Rik	2031.99	-0.669095	0.14301	2.21486e-07	2.38881e-05	CA-CN
Qpct	376.399	-0.667153	0.336892	0.00178955	0.0356543	CA-CN
2410002F23Rik	475.994	-0.642895	0.240748	0.000473488	0.0130718	CA-CN
Serpinb8	1152.89	-0.637368	0.209127	0.000169737	0.00596447	CA-CN
Ptbp2	810.022	-0.637111	0.22131	0.000281061	0.00867748	CA-CN
Abca9	6467.8	-0.633491	0.156518	1.14432e-06	9.7436e-05	CA-CN
Pid1	5169.3	-0.630937	0.149768	1.30851e-06	0.000109119	CA-CN
Slc20a1	850.016	-0.629576	0.193459	8.24355e-05	0.00345503	CA-CN
Hsp90aa1	786.626	-0.620509	0.199689	0.000126539	0.00480552	CA-CN
Cyp51	1029.12	-0.613036	0.213764	0.000220187	0.00733404	CA-CN
Rnd3	6469.39	-0.611172	0.13757	5.03048e-07	4.78724e-05	CA-CN
Mx2	523.861	-0.611117	0.233238	0.000566168	0.0151647	CA-CN
Axl	753.079	-0.605052	0.200956	0.000137495	0.00512534	CA-CN
Lamtor3	596.711	-0.60154	0.205718	0.000223342	0.00734396	CA-CN
Heg1	466.321	-0.598964	0.26973	0.0013448	0.0291676	CA-CN
Mat2a	4556.49	-0.598252	0.139222	1.38559e-06	0.000114111	CA-CN
Kcna3	265.9	-0.591308	0.30918	0.00248879	0.0453419	CA-CN
Abcb1b	615.936	-0.586438	0.203411	0.000251644	0.00804565	CA-CN
Gpr183	1364.22	-0.577486	0.17081	4.49552e-05	0.00216454	CA-CN
Clec2i	2512.49	-0.576568	0.148151	7.37905e-06	0.000466321	CA-CN
Stip1	1515.53	-0.574442	0.157281	2.26588e-05	0.00121382	CA-CN
Slfn4	1579.07	-0.569435	0.235685	0.0010428	0.0242986	CA-CN
Cd164	2344.45	-0.567492	0.141423	4.9883e-06	0.000336907	CA-CN
F630028O10Rik	3770.6	-0.562865	0.153766	2.1679e-05	0.00116908	CA-CN
Wsb1	5950.73	-0.561857	0.121537	3.05843e-07	3.25522e-05	CA-CN
Foxred2	1099.31	-0.55828	0.17559	8.95325e-05	0.00369504	CA-CN
Hnrnph1	4848.14	-0.557877	0.154576	2.5732e-05	0.00133427	CA-CN
Srsf7	3733.68	-0.557352	0.166316	6.80888e-05	0.0030753	CA-CN
Bmi1	523.861	-0.550374	0.229785	0.0010886	0.0248749	CA-CN
Ier2	4464.18	-0.547065	0.170438	0.000110913	0.00437646	CA-CN
Slfn1	4761.83	-0.546885	0.151138	2.1144e-05	0.00115563	CA-CN
Btg2	6710.34	-0.538723	0.125807	1.50687e-06	0.000121684	CA-CN
Alcam	3509.98	-0.533551	0.137264	7.98381e-06	0.000492985	CA-CN
Irak2	1590.37	-0.531513	0.183725	0.000261212	0.0082537	CA-CN
Rgs18	1155.17	-0.527888	0.19711	0.000378887	0.010839	CA-CN
Akap11	1111.11	-0.52601	0.179464	0.000264469	0.00829183	CA-CN
Pyroxd2	414.58	-0.525146	0.246797	0.00190982	0.0373152	CA-CN
Isg15	401.996	-0.523489	0.265151	0.00235105	0.043222	CA-CN
Glipr1	5179.04	-0.522726	0.12408	1.99189e-06	0.000154927	CA-CN
H3f3b	8530.96	-0.516325	0.142948	2.76946e-05	0.00142689	CA-CN
Cfp	5697.88	-0.516196	0.155749	7.58896e-05	0.00326527	CA-CN
Hdac10	601.649	-0.513049	0.225307	0.00155792	0.0326478	CA-CN
Adrb2	3027	-0.512572	0.13239	9.91058e-06	0.000593827	CA-CN
Ccl6	25767.4	-0.512367	0.133279	8.88743e-06	0.000544624	CA-CN
Klf4	5265.66	-0.51191	0.178341	0.000221227	0.00733404	CA-CN
Rtl5	1075.19	-0.510813	0.253617	0.00184684	0.0362598	CA-CN
Mdm4	5985.53	-0.503926	0.172037	0.000280579	0.00867748	CA-CN
Rpl10a	402.811	-0.498554	0.248287	0.00256234	0.0456487	CA-CN
Zmym2	1802.47	-0.497714	0.149494	7.97295e-05	0.00336402	CA-CN
Cmtm3	2847.23	-0.493786	0.159966	0.000136334	0.00510558	CA-CN
Ccnl1	5198.51	-0.492107	0.146374	7.01533e-05	0.00310093	CA-CN
Pde3b	502.194	-0.490979	0.235712	0.00226302	0.0421787	CA-CN
Hspa5	11867.6	-0.487382	0.120943	5.1519e-06	0.00034395	CA-CN
Cyp27a1	5996.32	-0.487317	0.132467	1.75285e-05	0.000984641	CA-CN
3110002H16Rik	1277.77	-0.483208	0.165912	0.000343052	0.0100907	CA-CN
Dmtf1	1972.54	-0.482144	0.160934	0.000242473	0.00781421	CA-CN
Zcchc11	759.377	-0.480844	0.229046	0.00211172	0.0399106	CA-CN
AI504432	664.433	-0.480748	0.202839	0.00125777	0.0277702	CA-CN
Eif4a2	7702.69	-0.479389	0.148319	0.000102572	0.00410746	CA-CN
Irf7	5342.21	-0.478721	0.162157	0.000216567	0.00726894	CA-CN
Ifi207	4571.65	-0.476056	0.131799	2.41873e-05	0.00127876	CA-CN
Parp11	825.923	-0.475326	0.19464	0.000939546	0.0222874	CA-CN
Ier5	3771.4	-0.473261	0.151085	0.000166641	0.00588627	CA-CN
Luc7l3	4761	-0.471521	0.145738	0.000112693	0.00441509	CA-CN
Slc25a37	2041.89	-0.470463	0.171076	0.000507991	0.0138822	CA-CN
Samd1	1292.95	-0.470018	0.206345	0.00170192	0.0343213	CA-CN
Klf6	12995	-0.469958	0.122901	1.31875e-05	0.000756551	CA-CN
Ear2	4194.46	-0.469088	0.187837	0.00108216	0.0247978	CA-CN
Ear3	4190.13	-0.468846	0.187553	0.00106763	0.0245343	CA-CN
Ear12	4190.13	-0.468846	0.187553	0.00106763	0.0245343	CA-CN
Batf3	683.395	-0.46863	0.242716	0.00271965	0.0476174	CA-CN
Paxbp1	2340.73	-0.465752	0.174351	0.000650957	0.0169858	CA-CN
Smad2	1991.39	-0.459049	0.144598	0.000125346	0.00478267	CA-CN
Irgm1	3111.7	-0.458714	0.227093	0.00194167	0.0377565	CA-CN
Akt3	1969.94	-0.452933	0.157318	0.000293328	0.00898762	CA-CN
Atf4	3118.83	-0.452418	0.139933	0.000120092	0.00462582	CA-CN
Nxf1	4662.98	-0.44841	0.150066	0.000299235	0.00910392	CA-CN
Dnajb1	1514.05	-0.447756	0.169608	0.000742964	0.0185489	CA-CN
Trappc5	984.948	-0.447496	0.208249	0.00164832	0.0336417	CA-CN
Fam193b	3327.63	-0.43693	0.138591	0.000175322	0.00608661	CA-CN
Zmynd11	1896.68	-0.436548	0.146531	0.00025835	0.00819528	CA-CN
Kpna4	2743.12	-0.435024	0.155669	0.000279774	0.00867748	CA-CN
Zc3h7a	4255.79	-0.432925	0.167856	0.000923141	0.0220274	CA-CN
Nfkbiz	2274.49	-0.431785	0.175589	0.00128286	0.0281222	CA-CN
Serinc3	34420	-0.430268	0.117736	2.34194e-05	0.00124631	CA-CN
Rbm39	9741.22	-0.429672	0.12039	3.73102e-05	0.00185474	CA-CN
Lilrb4a	11873.4	-0.427087	0.129423	9.84121e-05	0.00396047	CA-CN
Bid	2221.12	-0.42369	0.145826	0.000350357	0.0102253	CA-CN
BC037034	5359.41	-0.422449	0.133805	0.000151301	0.00546852	CA-CN
Rufy2	1041.76	-0.418528	0.19684	0.00277053	0.0481952	CA-CN
Ebi3	1340.34	-0.415816	0.189893	0.00209184	0.0396273	CA-CN
Slfn8	3336.86	-0.415596	0.144361	0.000325993	0.00980281	CA-CN
Dennd1c	2175.85	-0.413133	0.166998	0.00131148	0.0286718	CA-CN
Alpk1	2217.32	-0.408719	0.173052	0.00170567	0.0343213	CA-CN
Ccl9	23290.4	-0.407713	0.114634	3.85742e-05	0.00189107	CA-CN
Srsf2	6735.2	-0.40282	0.136098	0.000331116	0.0098834	CA-CN
Necap1	1436.42	-0.401219	0.167734	0.00164005	0.0336417	CA-CN
Emp3	9058.62	-0.400264	0.12177	0.0001463	0.00533072	CA-CN
L1cam	1344.13	-0.399882	0.172212	0.00224164	0.0418768	CA-CN
Uspl1	975.892	-0.396245	0.177332	0.00250582	0.0454474	CA-CN
Gcnt1	1673.86	-0.394752	0.180067	0.00253455	0.0456487	CA-CN
Sh3bp5	1635.63	-0.391458	0.156893	0.0012283	0.0273423	CA-CN
Ccdc88a	6103.76	-0.387821	0.124904	0.000199426	0.00677798	CA-CN
Hsp90b1	15026.6	-0.386476	0.119778	0.000140791	0.00520026	CA-CN
Dvl1	1428.88	-0.385376	0.164122	0.00195895	0.037909	CA-CN
2810403A07Rik	2831.26	-0.377718	0.150651	0.00135136	0.0291676	CA-CN
Ccnl2	4443.96	-0.37358	0.160165	0.00213827	0.0403181	CA-CN
Csf2ra	14132.2	-0.37166	0.115257	0.000151434	0.00546852	CA-CN
Spop	5192.1	-0.369574	0.140158	0.00116457	0.0263405	CA-CN
Ywhah	2175.83	-0.367391	0.142098	0.00103415	0.0242471	CA-CN
Nr3c1	3650.53	-0.359098	0.130639	0.00070045	0.0178174	CA-CN
Rock2	3916.64	-0.357878	0.12849	0.000683087	0.0175412	CA-CN
Gsdmd	4565.32	-0.353681	0.139951	0.0013972	0.0298204	CA-CN
Tgs1	1845.09	-0.353242	0.147764	0.00182328	0.0358844	CA-CN
Nlrp3	4074.89	-0.348536	0.129914	0.0010071	0.0236814	CA-CN
Hip1	3107.84	-0.348186	0.143945	0.00176489	0.0353879	CA-CN
Lat2	2045.09	-0.347989	0.148288	0.0020447	0.0391007	CA-CN
Lgals9	2599.32	-0.347395	0.142891	0.00181107	0.0358844	CA-CN
Sf3b1	16873.4	-0.347067	0.116864	0.000393333	0.0112031	CA-CN
Ythdc1	2581.24	-0.342932	0.138794	0.00166708	0.033797	CA-CN
Arid4a	3709.13	-0.325487	0.138968	0.00228778	0.0425422	CA-CN
Arhgap4	4593.23	-0.318392	0.13595	0.00271367	0.0476157	CA-CN
Fam111a	13286.5	-0.315665	0.121018	0.00115576	0.026261	CA-CN
Mfsd14a	3306.48	-0.311022	0.131905	0.00256289	0.0456487	CA-CN
Atp2b1	14458.9	-0.292054	0.119957	0.0024578	0.0449799	CA-CN
Saa3	619.756	0.0337508	0.150929	0.000414573	0.011644	CA-CN
Lrg1	873.154	0.033751	0.151057	2.18596e-06	0.000168403	CA-CN
S100a8	611.596	0.0948255	0.197326	4.01205e-07	4.10803e-05	CA-CN
Hbb-b1	1405.92	0.0979517	0.197473	0.00135219	0.0291676	CA-CN
Hbb-bs	1405.57	0.098031	0.19757	0.00134948	0.0291676	CA-CN
S100a9	724.369	0.108215	0.215309	6.17459e-06	0.000396399	CA-CN
Grn	13227.9	0.285769	0.120505	0.00257335	0.0456487	CA-CN
Akap13	17739.1	0.286161	0.117299	0.00230387	0.0426453	CA-CN
Esyt1	9465.75	0.293506	0.125116	0.00253009	0.0456487	CA-CN
B4galt5	7693.64	0.297542	0.123389	0.00218256	0.0410576	CA-CN
Taldo1	13815.9	0.303859	0.118764	0.00149602	0.031611	CA-CN
Map4k4	5507.44	0.307953	0.125921	0.00179529	0.0356808	CA-CN
Slc38a1	4031.71	0.32419	0.142018	0.00230233	0.0426453	CA-CN
Gsr	22682.3	0.326554	0.125475	0.00105347	0.0243858	CA-CN
Asap1	5634.98	0.326761	0.125526	0.00109811	0.0250215	CA-CN
Abr	7733.77	0.329186	0.127872	0.00118533	0.0266336	CA-CN
Rhoq	2860.45	0.332749	0.148988	0.00270502	0.0475672	CA-CN
Pros1	2647.73	0.336082	0.152757	0.00261203	0.0462336	CA-CN
Abhd12	2665.91	0.338644	0.140268	0.00168652	0.0341057	CA-CN
Csf1r	41532.6	0.339019	0.118348	0.000486225	0.0133324	CA-CN
Edem2	2395.1	0.339473	0.150904	0.00234586	0.043222	CA-CN
Trio	3599.6	0.339902	0.137172	0.00139581	0.0298204	CA-CN
Rreb1	2149.48	0.343082	0.151375	0.0022294	0.0417444	CA-CN
Atp6v1a	5073.66	0.343325	0.137835	0.00142385	0.0303093	CA-CN
Myd88	6087.23	0.343409	0.128141	0.000763547	0.0188879	CA-CN
Rftn1	2835.32	0.343779	0.146629	0.00197952	0.0382155	CA-CN
Acox3	4199.15	0.345509	0.145922	0.0016511	0.0336417	CA-CN
Cpne3	5199.01	0.345831	0.127111	0.000699217	0.0178174	CA-CN
Dap	2113.81	0.348587	0.145825	0.00166392	0.033797	CA-CN
Nsf	2681.16	0.351096	0.138088	0.00104536	0.0242986	CA-CN
Prkcsh	1451.88	0.353102	0.162135	0.00248017	0.0452869	CA-CN
Bmp2k	1829.33	0.354008	0.164066	0.00265383	0.0467686	CA-CN
Tmem14c	2491.66	0.358199	0.142675	0.00123376	0.0273423	CA-CN
Sort1	6977.64	0.362123	0.14202	0.000916088	0.0219238	CA-CN
Sema4d	11720.6	0.363844	0.150168	0.00123285	0.0273423	CA-CN
Tbc1d2b	5173.1	0.364509	0.125496	0.000364966	0.0105814	CA-CN
Emilin2	24938.8	0.366658	0.137737	0.000730554	0.0183523	CA-CN
Tbc1d9b	1858.94	0.366939	0.176788	0.00276707	0.0481952	CA-CN
Gnptab	2950.96	0.368333	0.144775	0.00116577	0.0263405	CA-CN
Pram1	1998.39	0.368659	0.161499	0.00205001	0.0391097	CA-CN
Klf13	18710.4	0.370538	0.136903	0.000646937	0.0169355	CA-CN
Lcp1	33632.5	0.371918	0.114965	0.00013046	0.00493127	CA-CN
Mob3b	1967.98	0.376236	0.15336	0.00121039	0.0271214	CA-CN
Furin	8233.91	0.377494	0.127566	0.000299375	0.00910392	CA-CN
Sf3b2	4624.5	0.378397	0.143434	0.000708679	0.0179702	CA-CN
Rnf149	6500.04	0.379242	0.136327	0.000563549	0.0151447	CA-CN
Pbxip1	5576.72	0.380542	0.127561	0.000285596	0.00878397	CA-CN
E2f2	1666.15	0.381169	0.156965	0.00154075	0.0323717	CA-CN
Phyh	1425.67	0.384586	0.162226	0.00150063	0.031611	CA-CN
Icam1	4172.91	0.384884	0.129455	0.000271268	0.00847216	CA-CN
Ubac2	2047.44	0.389542	0.160676	0.00117102	0.0263855	CA-CN
Cdkn2d	1486.08	0.389983	0.181571	0.00256983	0.0456487	CA-CN
Uqcrc1	3366.47	0.392864	0.158469	0.000936138	0.0222718	CA-CN
Pira1	3121.35	0.393204	0.148133	0.000725675	0.0182866	CA-CN
Apbb1ip	6558.34	0.394087	0.135116	0.000320465	0.00967253	CA-CN
Pira4	2961.72	0.394317	0.150073	0.000824472	0.0202095	CA-CN
Mkl1	4066.88	0.394879	0.129787	0.000212135	0.00717976	CA-CN
Adam9	2259.51	0.395176	0.148317	0.000621119	0.0164191	CA-CN
Man2a1	5321.6	0.395724	0.133046	0.000264137	0.00829183	CA-CN
Ncf4	10772.6	0.399314	0.118055	5.45092e-05	0.00259367	CA-CN
Gm14548	3057.47	0.400566	0.149619	0.00068201	0.0175412	CA-CN
Pira11	3057.77	0.400875	0.149582	0.000676656	0.0175004	CA-CN
Rbm47	1252.2	0.401888	0.201366	0.00263122	0.0464714	CA-CN
Sephs2	3067.45	0.403142	0.146231	0.000378914	0.010839	CA-CN
Gda	17497.9	0.403183	0.135849	0.000239247	0.00774107	CA-CN
Pira7	2977.33	0.404819	0.149604	0.000636218	0.016709	CA-CN
Olfm1	4203.06	0.406261	0.133598	0.000220813	0.00733404	CA-CN
Fry	1153.42	0.407072	0.182749	0.00177236	0.0353992	CA-CN
Glg1	2688.69	0.407319	0.143184	0.00036957	0.0106766	CA-CN
Aplp2	5768.38	0.410614	0.123873	7.87459e-05	0.0033525	CA-CN
Pira6	3271.51	0.41247	0.154141	0.000677168	0.0175004	CA-CN
Atrnl1	3116.3	0.419432	0.135782	0.000164806	0.00587274	CA-CN
Trem3	824.86	0.419586	0.202724	0.00273062	0.0477062	CA-CN
Tle3	4839.05	0.422401	0.167189	0.000753139	0.018745	CA-CN
Ttyh3	6220.95	0.423317	0.192726	0.00160806	0.0333529	CA-CN
Grk6	4966.76	0.42395	0.125995	6.60547e-05	0.00301874	CA-CN
Lrp10	5250.17	0.42465	0.133439	0.000124763	0.00478267	CA-CN
Rab11fip5	1016.4	0.428294	0.208383	0.00233303	0.0430865	CA-CN
Pik3cd	12064.2	0.428896	0.129107	6.8433e-05	0.0030753	CA-CN
Zc3h12d	2118.91	0.429089	0.168156	0.000881225	0.0213152	CA-CN
Gatm	4504.68	0.429207	0.134225	0.000113529	0.00441509	CA-CN
Prkcb	5972.59	0.434711	0.128049	6.24308e-05	0.00288573	CA-CN
Slc44a2	11636.5	0.434923	0.140661	0.000183178	0.0062785	CA-CN
N4bp1	5449.84	0.435493	0.141018	0.000176751	0.00609573	CA-CN
Wfdc17	3660.07	0.435619	0.134725	9.33549e-05	0.00383324	CA-CN
Casp6	967.193	0.43771	0.208593	0.00194459	0.0377565	CA-CN
Atmin	1480.85	0.439224	0.17329	0.000694455	0.0177767	CA-CN
Fgr	20214.5	0.439888	0.125979	4.29082e-05	0.00207835	CA-CN
Ndst1	2942.81	0.441793	0.146566	0.000174511	0.00608458	CA-CN
Mxd1	1033.45	0.442712	0.198746	0.00149963	0.031611	CA-CN
Def8	914.533	0.442939	0.202283	0.00209013	0.0396273	CA-CN
C2cd2l	986.588	0.44311	0.19212	0.00136831	0.0294368	CA-CN
Mink1	3925.92	0.443733	0.133476	6.92514e-05	0.00307788	CA-CN
Naaa	6966.6	0.444476	0.126558	3.3932e-05	0.00171548	CA-CN
Bin2	10416.5	0.444627	0.118744	1.19075e-05	0.000688	CA-CN
Mif4gd	668.974	0.444673	0.218136	0.00238545	0.0437549	CA-CN
Tmem164	4619.48	0.444748	0.134526	6.6672e-05	0.00302983	CA-CN
Ptk2b	4873.96	0.444794	0.149956	0.00021459	0.00723259	CA-CN
Pithd1	569.229	0.445336	0.222115	0.00255182	0.0456487	CA-CN
Galns	1219.05	0.446037	0.167157	0.000556827	0.0150139	CA-CN
Pik3cb	1112.56	0.447056	0.208156	0.00160232	0.0333191	CA-CN
Spen	3378.49	0.447125	0.135911	7.46168e-05	0.00324503	CA-CN
Nod1	2046.48	0.448515	0.176857	0.000758205	0.0188132	CA-CN
Relb	1438.29	0.451371	0.169733	0.000512957	0.0139707	CA-CN
Ttc7	9277.6	0.453754	0.135482	5.95841e-05	0.00278599	CA-CN
Acvr1b	2146.19	0.455056	0.145772	0.000145373	0.00532092	CA-CN
Npc1	2096.66	0.456823	0.156984	0.000230682	0.00752415	CA-CN
Tmem176a	3254.74	0.460811	0.145369	0.000104256	0.00415431	CA-CN
Pcnx	2620.15	0.461737	0.139892	7.83458e-05	0.0033525	CA-CN
Pik3r2	1149.03	0.461891	0.178463	0.000578	0.0153797	CA-CN
Spata13	2336.63	0.462779	0.173742	0.000481861	0.0132577	CA-CN
Pdk3	1129.57	0.465511	0.182135	0.000769577	0.0189213	CA-CN
Clcn7	1808.61	0.467143	0.168982	0.000406108	0.0115263	CA-CN
Ttc38	500.946	0.47022	0.236878	0.00254769	0.0456487	CA-CN
Aatk	698.916	0.470551	0.214101	0.0015637	0.0326841	CA-CN
Ikbke	2382.6	0.470824	0.173458	0.000520087	0.0141174	CA-CN
Irf2bpl	1525.74	0.473225	0.221331	0.00163785	0.0336417	CA-CN
Rbl2	1648.09	0.47481	0.156765	0.000177092	0.00609573	CA-CN
Zfp36l1	1223.73	0.476875	0.243831	0.00162715	0.0335767	CA-CN
Coro2a	1313.49	0.476883	0.216921	0.00127199	0.0279596	CA-CN
Ern1	3260.4	0.478111	0.142469	5.36066e-05	0.00256582	CA-CN
Nectin4	496.835	0.478585	0.242358	0.00254105	0.0456487	CA-CN
Cep164	573.486	0.481366	0.22825	0.00201817	0.0386847	CA-CN
Sorl1	11670.6	0.483823	0.1183	3.19307e-06	0.000234807	CA-CN
Ntng2	1771.77	0.488491	0.195664	0.00073722	0.0184625	CA-CN
Dnajb12	924.736	0.488897	0.18709	0.000535651	0.0144913	CA-CN
Jaml	2886.12	0.490199	0.159819	0.00013622	0.00510558	CA-CN
Prr5l	1527.91	0.496102	0.214876	0.00104052	0.0242986	CA-CN
E330009J07Rik	789.658	0.497463	0.240184	0.0020026	0.0385692	CA-CN
Tmem110	867.453	0.497822	0.21505	0.00105514	0.0243858	CA-CN
Rsc1a1	2831.53	0.498087	0.149338	6.29301e-05	0.00289228	CA-CN
Ppt1	9423.07	0.500333	0.121941	3.406e-06	0.000246537	CA-CN
Parvg	1185.76	0.503651	0.182959	0.000379212	0.010839	CA-CN
6530402F18Rik	2248.22	0.505897	0.157016	8.46591e-05	0.00351183	CA-CN
Cpd	1553.65	0.50632	0.195512	0.000441038	0.0122596	CA-CN
Gngt2	3243.5	0.506369	0.137184	2.05038e-05	0.00112827	CA-CN
Vti1a	868.065	0.511494	0.225344	0.000944311	0.0223349	CA-CN
Itgb5	1848.83	0.512872	0.148693	3.96234e-05	0.00193081	CA-CN
Cds2	4559.8	0.514472	0.160807	9.65847e-05	0.003926	CA-CN
Fnip2	1033.44	0.516906	0.180186	0.000235771	0.00765925	CA-CN
Cyp39a1	631.307	0.520707	0.252762	0.00158239	0.0329895	CA-CN
Gypc	852.68	0.520758	0.187339	0.00033009	0.0098834	CA-CN
C3	21753.8	0.522264	0.116029	5.35158e-07	4.97574e-05	CA-CN
Serinc5	1382.09	0.52248	0.174595	0.000143512	0.00527667	CA-CN
Tspo	4995.32	0.522605	0.12603	2.44044e-06	0.000184493	CA-CN
Bhlhe40	705.772	0.531348	0.257033	0.00205851	0.0391796	CA-CN
Card14	441.586	0.539992	0.248257	0.00139393	0.0298204	CA-CN
Susd6	5241.95	0.541395	0.152524	2.13134e-05	0.00115707	CA-CN
H6pd	2423.02	0.542001	0.171209	6.89484e-05	0.00307788	CA-CN
B4galt6	997.952	0.544423	0.225393	0.000718049	0.0181509	CA-CN
Arid5a	2481.69	0.545984	0.13805	5.18752e-06	0.00034395	CA-CN
Trappc12	675.262	0.551536	0.244104	0.000912479	0.0219022	CA-CN
Sys1	1476.48	0.551768	0.178923	9.41878e-05	0.0038479	CA-CN
Cd302	2793	0.556544	0.14193	4.998e-06	0.000336907	CA-CN
Xxylt1	629.8	0.559379	0.211533	0.000411333	0.0116338	CA-CN
Acaa1a	1746.78	0.561276	0.149262	1.04451e-05	0.000621251	CA-CN
B9d2	872.687	0.567226	0.201897	0.000245179	0.00787007	CA-CN
Pag1	2001.08	0.571136	0.165676	3.77306e-05	0.00186099	CA-CN
Ampd3	3749.63	0.574638	0.137119	1.91043e-06	0.000150034	CA-CN
Bckdha	2046.92	0.57582	0.14404	3.50447e-06	0.000250864	CA-CN
Wdr7	991.834	0.57754	0.22008	0.000351418	0.0102253	CA-CN
Fam110a	316.112	0.57856	0.293235	0.0019464	0.0377565	CA-CN
Agtrap	1423.34	0.580578	0.171867	3.49306e-05	0.00175499	CA-CN
Acp5	1201.78	0.581384	0.166281	3.24964e-05	0.00165323	CA-CN
Ddi2	4241.57	0.588851	0.133696	7.05406e-07	6.41127e-05	CA-CN
Gyg	4656.49	0.590366	0.138074	1.51936e-06	0.000121684	CA-CN
Trappc9	664.255	0.594073	0.223901	0.000334637	0.0099153	CA-CN
P2ry12	387.41	0.60369	0.25905	0.000895226	0.021552	CA-CN
Rest	1449.4	0.603855	0.179899	3.73744e-05	0.00185474	CA-CN
Eps8	405.193	0.606293	0.282609	0.00122721	0.0273423	CA-CN
Lrp1	28819.6	0.608683	0.117517	8.59409e-09	1.33688e-06	CA-CN
Kremen1	882.419	0.610964	0.21355	0.000170329	0.00596447	CA-CN
Tmem131	6077.38	0.617703	0.129688	1.2e-07	1.42747e-05	CA-CN
Cd40	1036.09	0.618049	0.222866	0.000223208	0.00734396	CA-CN
Slc22a4	310.254	0.622351	0.322763	0.00219255	0.0411497	CA-CN
Gab1	563.637	0.622457	0.230136	0.000332784	0.00989666	CA-CN
Rem1	485.592	0.623665	0.309425	0.0019082	0.0373152	CA-CN
Arhgap26	7466.96	0.626587	0.121719	1.89429e-08	2.73623e-06	CA-CN
Cux1	2514.76	0.636215	0.165979	9.40515e-06	0.000567748	CA-CN
Tgfbi	34741.2	0.636264	0.113596	1.55044e-09	2.72642e-07	CA-CN
Trem2	1268.93	0.639532	0.185923	3.2029e-05	0.00163976	CA-CN
Bcl2l1	389.59	0.642836	0.291444	0.000864025	0.0210515	CA-CN
Eif2b2	1095.19	0.646885	0.171413	9.26968e-06	0.000563778	CA-CN
Cd300lf	1997.26	0.648764	0.151989	9.85994e-07	8.76451e-05	CA-CN
Aig1	188.192	0.649485	0.380299	0.00278066	0.0482678	CA-CN
Tfec	627.32	0.656507	0.250384	0.000455119	0.0126077	CA-CN
Lrrc8b	2727.53	0.656751	0.144977	4.22108e-07	4.21535e-05	CA-CN
Nrbf2	248.378	0.657596	0.378842	0.00200979	0.0386156	CA-CN
Slc28a2	684.744	0.665032	0.233487	0.000163545	0.00585361	CA-CN
Ripor2	1880.8	0.668393	0.183903	1.82814e-05	0.00101985	CA-CN
Ctnnd1	3644.62	0.668437	0.141074	1.44342e-07	1.66798e-05	CA-CN
Scarb1	8241.44	0.670895	0.139171	7.36826e-08	9.03058e-06	CA-CN
Cyp4f18	1037.72	0.682123	0.212015	7.52825e-05	0.00325647	CA-CN
Gatsl2	584.425	0.684541	0.215414	7.3478e-05	0.00321761	CA-CN
Mcm4	584.839	0.69181	0.21279	5.93839e-05	0.00278599	CA-CN
Cd200r1	271.723	0.696463	0.323711	0.00125994	0.0277702	CA-CN
Cttnbp2nl	381.612	0.709453	0.289089	0.000429157	0.012012	CA-CN
Dhx38	2218.68	0.710019	0.151134	1.09193e-07	1.3183e-05	CA-CN
Ptgr1	547.803	0.713203	0.271728	0.000413873	0.011644	CA-CN
Sgsh	1792.58	0.715933	0.162071	4.94293e-07	4.75992e-05	CA-CN
Cfh	3774.16	0.721536	0.132729	3.70055e-09	6.36889e-07	CA-CN
Nxpe5	321.056	0.728973	0.308266	0.000768827	0.0189213	CA-CN
Ms4a4a	1049.66	0.730504	0.200843	1.51893e-05	0.000859202	CA-CN
Emilin1	1688.72	0.732359	0.16422	3.12364e-07	3.28145e-05	CA-CN
Bmf	2082.5	0.737539	0.198897	5.81103e-06	0.000376431	CA-CN
Ptpn1	15594.1	0.743419	0.128575	4.07657e-10	8.45523e-08	CA-CN
Mrpl52	802.763	0.75199	0.201641	7.35863e-06	0.000466321	CA-CN
Gaa	990.441	0.763612	0.182993	1.12574e-06	9.68738e-05	CA-CN
2810025M15Rik	360.956	0.772071	0.254418	0.00010575	0.0041932	CA-CN
Flot1	1954.49	0.789159	0.147977	6.30389e-09	9.99846e-07	CA-CN
Hebp1	2547.02	0.790495	0.159995	5.49495e-08	7.05534e-06	CA-CN
Cd274	389.658	0.792234	0.247877	6.07723e-05	0.00282521	CA-CN
Nfil3	1885.38	0.792405	0.161831	5.31689e-08	6.93683e-06	CA-CN
1600014C10Rik	3511.52	0.794085	0.137372	4.88864e-10	9.64492e-08	CA-CN
Hp	15566.6	0.811294	0.124723	6.15268e-12	1.60545e-09	CA-CN
Paqr3	561.772	0.843831	0.232734	1.13926e-05	0.000667788	CA-CN
Cdk20	217.433	0.847402	0.331592	0.000350591	0.0102253	CA-CN
Sbno2	9829.22	0.850232	0.129852	4.0017e-12	1.07899e-09	CA-CN
Bcl3	3457.5	0.8528	0.149041	5.57824e-10	1.02551e-07	CA-CN
Csf2rb	14876.9	0.858503	0.118542	2.43299e-14	1.09336e-11	CA-CN
Slc12a7	518.025	0.863219	0.217563	3.41354e-06	0.000246537	CA-CN
Fam234b	1581.28	0.866885	0.152242	7.36528e-10	1.32395e-07	CA-CN
Gpr146	1560.27	0.878566	0.203922	8.08252e-07	7.26439e-05	CA-CN
Camk2d	3506.09	0.890949	0.168849	1.18256e-08	1.73923e-06	CA-CN
Id3	287.143	0.892572	0.295035	0.000113386	0.00441509	CA-CN
Nlrx1	1187.83	0.89714	0.169542	5.41031e-09	8.7528e-07	CA-CN
Cyfip2	1597.77	0.919739	0.153712	1.34481e-10	2.94005e-08	CA-CN
Shtn1	980.02	0.919794	0.263511	2.49902e-05	0.00131264	CA-CN
Sfxn5	546.697	0.921877	0.222933	1.39658e-06	0.000114111	CA-CN
Ctdspl	1339.34	0.947417	0.204207	1.23285e-07	1.44529e-05	CA-CN
Ccdc86	339.838	0.948349	0.258034	1.0725e-05	0.000633242	CA-CN
Ipcef1	673.111	0.977522	0.205497	6.83046e-08	8.63306e-06	CA-CN
Abi3	5853.49	0.986009	0.140513	1.61388e-13	6.09687e-11	CA-CN
Tmem268	2430.17	0.999834	0.141713	1.11585e-13	4.75059e-11	CA-CN
0610040J01Rik	357.669	1.00173	0.255821	4.48832e-06	0.000310308	CA-CN
Chil1	4225	1.00441	0.150474	1.83664e-12	5.30593e-10	CA-CN
Serpina3f	171.068	1.00753	0.507769	0.00063551	0.016709	CA-CN
Fam217b	294.592	1.01004	0.284058	1.34953e-05	0.000768755	CA-CN
Flot2	2590.27	1.05033	0.149358	3.24406e-13	1.00928e-10	CA-CN
Jak3	1679.54	1.06442	0.153038	3.04578e-13	1.00928e-10	CA-CN
Sema6b	448.278	1.1529	0.269079	1.01392e-06	8.91476e-05	CA-CN
Atp11a	2959.15	1.15735	0.152002	2.12591e-15	1.07478e-12	CA-CN
Insl3	119.997	1.17769	0.433936	0.000197289	0.00673362	CA-CN
Il4ra	4291.2	1.18058	0.127635	1.20858e-21	1.95524e-18	CA-CN
Prtn3	725.341	1.18473	0.235843	3.24112e-08	4.52024e-06	CA-CN
C1rl	613.608	1.19177	0.227661	1.0282e-08	1.56927e-06	CA-CN
Csf2rb2	3389.33	1.24423	0.136485	2.68298e-21	3.61711e-18	CA-CN
Tgm1	262.296	1.24431	0.314636	3.81765e-06	0.00026869	CA-CN
Serpina3g	705.941	1.26615	0.259792	5.14385e-08	6.82108e-06	CA-CN
Hba-a1	1567.42	1.29372	0.792174	0.00182025	0.0358844	CA-CN
Hba-a2	1567.42	1.29372	0.792174	0.00182025	0.0358844	CA-CN
P2ry13	322.337	1.31457	0.269677	3.83571e-08	5.25882e-06	CA-CN
Tarm1	253.58	1.3195	0.336949	4.3287e-06	0.000301852	CA-CN
Arhgap24	332.743	1.36171	0.254807	4.41155e-09	7.28265e-07	CA-CN
Ppp1r3d	299.638	1.3846	0.279679	2.55497e-08	3.62582e-06	CA-CN
Ptgfrn	1191.98	1.41566	0.172888	8.70842e-18	6.40386e-15	CA-CN
Socs3	4605.93	1.45335	0.18257	5.84821e-16	3.15374e-13	CA-CN
Phospho1	766.159	1.50484	0.1865	2.56664e-17	1.73013e-14	CA-CN
Alas2	120.772	1.53151	0.685537	0.000585101	0.0155176	CA-CN
Pam	571.349	1.56732	0.228129	3.12255e-13	1.00928e-10	CA-CN
Gcnt2	2160.55	2.32774	0.181547	3.43142e-38	2.77568e-34	CA-CN
A730081D07Rik	334.768	2.34893	0.279529	4.0682e-18	3.29077e-15	CA-CN
Upp1	115	2.54311	0.424799	7.01485e-11	1.66892e-08	CA-CN
F11r	235.711	3.14984	0.403671	5.30743e-16	3.06656e-13	CA-CN
Cxcr2	221.917	3.35717	0.355694	3.53008e-22	7.13871e-19	CA-CN
Igfbp6	116.697	4.03852	0.515576	5.15139e-16	3.06656e-13	CA-CN
Wfdc21	87.3946	6.40924	0.946563	2.5416e-12	7.08932e-10	CA-CN

## Sheet: FC>2
GENE	baseMean	log2FoldChange	lfcSE	stat	pvalue	padj	contrast
Wfdc21	87.3946	6.6927	0.955965	-7.00099	2.5416e-12	7.08932e-10	CA-CN
Lrg1	873.154	5.94842	1.25615	-4.73543	2.18596e-06	0.000168403	CA-CN
Retnlg	68.6534	4.60486	1.66369	-2.76787	0.00564246	0.078884	CA-CN
Saa3	619.756	4.24053	1.20107	-3.53063	0.000414573	0.011644	CA-CN
Igfbp6	116.697	4.16665	0.513901	-8.10787	5.15139e-16	3.06656e-13	CA-CN
S100a8	611.596	3.9496	0.779261	-5.06839	4.01205e-07	4.10803e-05	CA-CN
Cxcr2	221.917	3.43333	0.35454	-9.68389	3.53008e-22	7.13871e-19	CA-CN
F11r	235.711	3.2504	0.401074	-8.10424	5.30743e-16	3.06656e-13	CA-CN
S100a9	724.369	3.23357	0.715342	-4.52032	6.17459e-06	0.000396399	CA-CN
Upp1	115	2.67999	0.41102	-6.52034	7.01485e-11	1.66892e-08	CA-CN
Lcn2	290.712	2.66432	0.900997	-2.95708	0.00310564	0.053111	CA-CN
A730081D07Rik	334.768	2.41354	0.278158	-8.67687	4.0682e-18	3.29077e-15	CA-CN
Gcnt2	2160.55	2.35662	0.182388	-12.9209	3.43142e-38	2.77568e-34	CA-CN
Lbp	204.104	2.21202	0.93337	-2.36992	0.0177918	0.159201	CA-CN
Hbb-bt	279.364	2.12316	1.11127	-1.91058	0.0560587	0.304131	CA-CN
Hbb-b2	279.364	2.12316	1.11127	-1.91058	0.0560587	0.304131	CA-CN
Hbb-b1	1405.92	2.05783	0.642134	-3.20467	0.00135219	0.0291676	CA-CN
Hbb-bs	1405.57	2.05757	0.641939	-3.20524	0.00134948	0.0291676	CA-CN
Alas2	120.772	1.96325	0.570973	-3.43843	0.000585101	0.0155176	CA-CN
Hba-a1	1567.42	1.82466	0.585185	-3.11809	0.00182025	0.0358844	CA-CN
Hba-a2	1567.42	1.82466	0.585185	-3.11809	0.00182025	0.0358844	CA-CN
Pam	571.349	1.63449	0.224241	-7.289	3.12255e-13	1.00928e-10	CA-CN
Phospho1	766.159	1.55068	0.183192	-8.46477	2.56664e-17	1.73013e-14	CA-CN
Ppp1r3d	299.638	1.48743	0.267068	-5.56948	2.55497e-08	3.62582e-06	CA-CN
Socs3	4605.93	1.47523	0.182297	-8.09244	5.84821e-16	3.15374e-13	CA-CN
Tarm1	253.58	1.46891	0.31968	-4.59494	4.3287e-06	0.000301852	CA-CN
Ptgfrn	1191.98	1.45208	0.169046	-8.58985	8.70842e-18	6.40386e-15	CA-CN
Arhgap24	332.743	1.45135	0.247335	-5.86797	4.41155e-09	7.28265e-07	CA-CN
Fcnb	92.4959	1.44174	0.494463	-2.91576	0.00354818	0.0576858	CA-CN
Insl3	119.997	1.42217	0.382051	-3.72246	0.000197289	0.00673362	CA-CN
P2ry13	322.337	1.41456	0.257275	-5.49825	3.83571e-08	5.25882e-06	CA-CN
Spink2	67.8427	1.39159	0.590065	-2.35836	0.0183557	0.162628	CA-CN
Mt1	94.7919	1.38639	0.503143	-2.75546	0.00586091	0.0807898	CA-CN
Tgm1	262.296	1.38264	0.299202	-4.62107	3.81765e-06	0.00026869	CA-CN
Serpina3g	705.941	1.36646	0.250899	-5.44627	5.14385e-08	6.82108e-06	CA-CN
Serpina3f	171.068	1.35032	0.395295	-3.41599	0.00063551	0.016709	CA-CN
Csf2rb2	3389.33	1.27226	0.134284	-9.4744	2.68298e-21	3.61711e-18	CA-CN
C1rl	613.608	1.27106	0.221979	-5.72601	1.0282e-08	1.56927e-06	CA-CN
Prtn3	725.341	1.26975	0.229699	-5.52789	3.24112e-08	4.52024e-06	CA-CN
Sema6b	448.278	1.26347	0.258436	-4.88892	1.01392e-06	8.91476e-05	CA-CN
Gm15350	76.4144	1.24133	0.578509	-2.14573	0.0318943	0.222962	CA-CN
Il4ra	4291.2	1.20698	0.126289	-9.55731	1.20858e-21	1.95524e-18	CA-CN
Atp11a	2959.15	1.19538	0.150669	-7.93377	2.12591e-15	1.07478e-12	CA-CN
Ift27	123.671	1.16982	0.39592	-2.95467	0.00312999	0.0533021	CA-CN
Fam217b	294.592	1.14224	0.262469	-4.35192	1.34953e-05	0.000768755	CA-CN
0610040J01Rik	357.669	1.11401	0.242841	-4.58739	4.48832e-06	0.000310308	CA-CN
Jak3	1679.54	1.09892	0.150695	-7.29236	3.04578e-13	1.00928e-10	CA-CN
Flot2	2590.27	1.07738	0.147913	-7.28386	3.24406e-13	1.00928e-10	CA-CN
Ccdc86	339.838	1.06693	0.242373	-4.40202	1.0725e-05	0.000633242	CA-CN
Chil3	41217.2	1.05852	0.667407	-1.58602	0.112734	0.439397	CA-CN
Ipcef1	673.111	1.05291	0.195143	-5.39557	6.83046e-08	8.63306e-06	CA-CN
Cd24a	211.322	1.05272	0.355605	-2.96036	0.00307281	0.052661	CA-CN
Id3	287.143	1.04768	0.271419	-3.86	0.000113386	0.00441509	CA-CN
Chil1	4225	1.04687	0.148569	-7.04636	1.83664e-12	5.30593e-10	CA-CN
Shtn1	980.02	1.04515	0.247966	-4.21489	2.49902e-05	0.00131264	CA-CN
Cdk20	217.433	1.041	0.291211	-3.57473	0.000350591	0.0102253	CA-CN
Tmem268	2430.17	1.03744	0.139696	-7.42641	1.11585e-13	4.75059e-11	CA-CN
F10	5184.73	1.03073	0.371837	-2.77199	0.00557154	0.0783795	CA-CN
Ctdspl	1339.34	1.02356	0.193543	-5.28856	1.23285e-07	1.44529e-05	CA-CN
Abi3	5853.49	1.02322	0.138696	-7.37742	1.61388e-13	6.09687e-11	CA-CN
Sfxn5	546.697	1.01081	0.209472	-4.82549	1.39658e-06	0.000114111	CA-CN
Rpl30	68.091	1.00902	0.605535	-1.66632	0.0956494	0.40572	CA-CN
Foxq1	215.908	-1.00037	0.443753	2.25433	0.0241754	0.189125	CA-CN
Rhebl1	130.621	-1.00135	0.374888	2.67106	0.00756122	0.0945328	CA-CN
Ms4a7	867.481	-1.00559	0.220132	4.56813	4.92103e-06	0.000336907	CA-CN
Alox5	375.11	-1.0139	0.257613	3.93576	8.29324e-05	0.00345794	CA-CN
Lmtk2	690.355	-1.02561	0.204433	5.01688	5.25186e-07	4.93981e-05	CA-CN
Ifit3	205.39	-1.02936	0.404042	2.54767	0.0108446	0.119349	CA-CN
Il12rb2	423.558	-1.04239	0.2434	4.28261	1.84711e-05	0.00102338	CA-CN
Lmna	825.094	-1.04694	1.02216	1.02423	0.305725	0.668019	CA-CN
Tsc22d1	991.514	-1.0533	0.203142	5.18505	2.15953e-07	2.3606e-05	CA-CN
Ifit1	269.22	-1.05722	0.331842	3.18592	0.00144294	0.0306351	CA-CN
Pgap1	2063.87	-1.05804	0.147661	7.16534	7.75948e-13	2.32468e-10	CA-CN
Hist1h1c	164.673	-1.08626	0.385702	2.81631	0.00485781	0.071882	CA-CN
Hcfc2	210.532	-1.08739	0.288767	3.76561	0.000166143	0.00588627	CA-CN
Ppbp	688.113	-1.08835	0.572442	1.90124	0.0572709	0.307817	CA-CN
Il15	425.462	-1.09766	0.221254	4.96108	7.01034e-07	6.41127e-05	CA-CN
Tubb1	211.144	-1.10765	0.399676	2.77138	0.00558197	0.0783898	CA-CN
Sult1a1	139.226	-1.11163	0.367628	3.02379	0.00249632	0.045377	CA-CN
Tnf	251.511	-1.11424	0.276852	4.02468	5.70529e-05	0.00269883	CA-CN
Pdlim7	183.284	-1.12636	0.357781	3.14819	0.00164287	0.0336417	CA-CN
Rtp4	687.917	-1.13642	0.245929	4.62095	3.81992e-06	0.00026869	CA-CN
Usp18	569.785	-1.16797	0.23962	4.87427	1.0921e-06	9.49892e-05	CA-CN
Gng11	119.79	-1.17621	0.445292	2.64143	0.00825571	0.099228	CA-CN
Rpl10	140.767	-1.17801	0.356606	3.30339	0.000955243	0.0225276	CA-CN
Olfr433	88.1322	-1.19842	0.476781	2.51357	0.0119516	0.127206	CA-CN
Plekhh3	558.623	-1.21208	0.239569	5.05944	4.20483e-07	4.21535e-05	CA-CN
Crip2	329.596	-1.22416	0.9605	1.2745	0.202486	0.578562	CA-CN
Rnase2a	133.949	-1.2478	0.373815	3.33802	0.000843786	0.0206205	CA-CN
Ctla2a	354.222	-1.25578	0.249636	5.03043	4.89382e-07	4.75992e-05	CA-CN
Ifit2	588.976	-1.26441	0.5851	2.16102	0.0306938	0.217791	CA-CN
Sqle	428.035	-1.28586	0.247711	5.19098	2.09192e-07	2.31802e-05	CA-CN
H2-T24	1735.92	-1.29088	0.199869	6.45865	1.05645e-10	2.4416e-08	CA-CN
E230016K23Rik	604.171	-1.29567	0.19609	6.60755	3.90738e-11	9.87712e-09	CA-CN
Ifi208	323.34	-1.30685	0.251075	5.20502	1.9398e-07	2.17931e-05	CA-CN
Hist1h4i	21.6715	-1.31858	0.943975	1.39684	0.162462	0.52756	CA-CN
Lyz1	776.843	-1.32622	0.21351	6.2115	5.24802e-10	1.00146e-07	CA-CN
Pf4	203.423	-1.35489	0.351224	3.85763	0.000114493	0.00443127	CA-CN
Siglec1	821.042	-1.36935	0.271147	5.05022	4.4131e-07	4.35336e-05	CA-CN
Fos	12439.4	-1.38773	0.660066	2.10241	0.0355173	0.235684	CA-CN
Rps13	34.4059	-1.39899	0.735558	1.90195	0.0571776	0.30752	CA-CN
Itga2b	301.099	-1.40983	0.275936	5.10926	3.23418e-07	3.35401e-05	CA-CN
Gp9	129.173	-1.42815	0.472834	3.0204	0.00252444	0.0456487	CA-CN
Ccl5	45.3742	-1.43787	0.617041	2.33026	0.0197925	0.169244	CA-CN
Tlr11	304.158	-1.49793	1.03393	1.44878	0.1474	0.502239	CA-CN
Dusp1	4258.66	-1.53109	0.602557	2.54099	0.011054	0.120506	CA-CN
Tgtp2	183.846	-1.54586	1.09606	1.41038	0.158428	0.52266	CA-CN
Cd9	482.914	-1.56893	0.21277	7.37381	1.65819e-13	6.09687e-11	CA-CN
Dok2	587.114	-1.57314	0.212849	7.3909	1.45837e-13	5.89839e-11	CA-CN
Klrk1	339.983	-1.57703	0.823343	1.9154	0.0554421	0.302408	CA-CN
Fhl1	143.791	-1.58084	0.45913	3.44312	0.000575042	0.0153515	CA-CN
Pcp4l1	131.982	-1.64295	0.445387	3.68881	0.000225306	0.00737856	CA-CN
5730408K05Rik	59.756	-1.65238	0.514847	3.20946	0.00132985	0.0289951	CA-CN
Nab2	684.892	-1.71898	0.193469	8.88505	6.3891e-19	7.21009e-16	CA-CN
Asgr2	140.445	-1.72648	0.361137	4.78067	1.74714e-06	0.000138555	CA-CN
Cd209d	137.677	-1.78525	0.424078	4.20972	2.55687e-05	0.00133427	CA-CN
Alox12	145.49	-1.78645	0.399876	4.4675	7.91392e-06	0.000492428	CA-CN
Tmod4	142.963	-1.80148	0.371207	4.85303	1.21587e-06	0.00010245	CA-CN
Nrgn	655.364	-1.80734	0.207976	8.69013	3.62023e-18	3.25378e-15	CA-CN
4931408C20Rik	2019.71	-1.89905	0.152261	12.4723	1.05708e-35	4.27537e-32	CA-CN
Cd209a	1623.74	-1.92461	0.565642	3.40253	0.000667655	0.0173655	CA-CN
Cd83	199.286	-1.93569	0.36939	5.24023	1.60375e-07	1.82714e-05	CA-CN
Clec1b	77.7798	-2.04921	0.519465	3.94486	7.98482e-05	0.00336402	CA-CN
Mrc1	540.211	-2.10401	0.632092	3.32864	0.000872708	0.0211992	CA-CN
Cd36	480.314	-2.43082	0.309433	7.8557	3.9753e-15	1.89154e-12	CA-CN
Ccl2	53.1305	-2.51131	0.659368	3.80866	0.000139722	0.00518444	CA-CN
Lpl	384.553	-2.51215	0.283128	8.87283	7.13076e-19	7.21009e-16	CA-CN
Itga8	484.088	-2.569	0.870508	2.95115	0.0031659	0.0538003	CA-CN
Ccl3	84.2463	-2.58172	0.553884	4.66113	3.14481e-06	0.000233379	CA-CN
Hspa1b	1712.87	-2.94817	1.27327	2.31542	0.0205897	0.172591	CA-CN
Egr1	449.573	-2.96074	0.826769	3.58109	0.000342161	0.0100907	CA-CN
Fosb	911.293	-2.97241	0.256721	11.5784	5.30481e-31	1.43035e-27	CA-CN
Hist1h2bg	32.0243	-3.0716	0.923663	3.32545	0.000882752	0.0213152	CA-CN
Hspa1a	1170.44	-3.10054	1.4981	2.06965	0.0384849	0.24648	CA-CN
Jun	2334	-3.2881	1.27533	2.57823	0.00993077	0.11235	CA-CN
